# Supplementary material for: Validation of a Point-of-Care Optical Coherence Tomography Device with Machine Learning Algorithm for Detection of Oral Potentially Malignant and Malignant Lesions
Source: MDPI journal article supplement (doi:10.3390/cancers13143583), 2021-07-17
Supplement: s1 [file s1]

## Article

# Validation of a Point-of-Care Optical Coherence Tomography Device with Machine Learning Algorithm for Detection of Oral Potentially Malignant and Malignant Lesions

Bonney Lee James<sup>1,2,†</sup>, Sumsum P. Sunny<sup>1,2,3,†</sup>, Andrew Emon Heidari<sup>4</sup>, Ravindra D Ramanjinappa<sup>1</sup>, Tracie Lam<sup>4</sup>, Anne V. Tran<sup>4</sup>, Sandeep Kankanala<sup>5</sup>, Shiladitya Sil<sup>5</sup>, Vidya Tiwari<sup>6</sup>, Sanjana Patrick<sup>6</sup>, Vijay Pillai<sup>3</sup>, Vivek Shetty<sup>3</sup>, Naveen Hedne<sup>3</sup>, Darshat Shah<sup>7</sup>, Nameeta Shah<sup>7</sup>, Zhong-ping Chen<sup>4</sup>, Uma Kandasarma<sup>8</sup>, Shubhasini Attavar Raghavan<sup>5</sup>, Subha Gurudath<sup>5</sup>, Praveen Birur Nagraj<sup>1,5,6</sup>, Petra Wilder-Smith<sup>4</sup>, Amritha Suresh<sup>1,3,\*</sup>, and Moni Abraham Kuriakose<sup>1,3,\*</sup>

<sup>1</sup> Integrated Head and Neck Oncology Program (DSRG-5), Mazumdar Shaw Center for Translational Research (MSCTR), Mazumdar Shaw Medical Foundation, NH Health City, 560099 Bangalore, India; [bonney.lee.james@ms-mf.org](mailto:bonney.lee.james@ms-mf.org) (B.L.J.); [sumsumsp@gmail.com](mailto:sumsumsp@gmail.com) (S.P.S.); [ravindradr88@gmail.com](mailto:ravindradr88@gmail.com) (R.D.R.); [praveen.birur@gmail.com](mailto:praveen.birur@gmail.com) (P.B.N.); [amritha.suresh@ms-mf.org](mailto:amritha.suresh@ms-mf.org) (A.S.); [makuriakose@gmail.com](mailto:makuriakose@gmail.com) (M.A.K.)

<sup>2</sup> Manipal Academy of Higher Education (MAHE), Manipal, 576104 Karnataka, India

<sup>3</sup> Department of Head and Neck Oncology, Mazumdar Shaw Medical Center, NH Health City, 560099 Bangalore, India; [drvijaypillai@gmail.com](mailto:drvijaypillai@gmail.com) (V.P.); [vivek.shetty.dr@narayanahealth.org](mailto:vivek.shetty.dr@narayanahealth.org) (V.S.); [hednenaveen@gmail.com](mailto:hednenaveen@gmail.com) (N.H)

<sup>4</sup> Beckman Laser Institute, UCI, Irvine, California 92612, USA.; [aheidari.uci@gmail.com](mailto:aheidari.uci@gmail.com) (A.E.H.); [tracielam.m@gmail.com](mailto:tracielam.m@gmail.com) (T.L.); [annevt@uci.edu](mailto:annevt@uci.edu) (A.V.T.); [z2chen@uci.edu](mailto:z2chen@uci.edu) (Z.C.); [pwsmith@uci.edu](mailto:pwsmith@uci.edu) (P.W.-S.)

<sup>5</sup> Department of Oral Medicine and Radiology, KLE Society's Institute of Dental Sciences, 560022 Bangalore, India; [kankanala.sandeep86@gmail.com](mailto:kankanala.sandeep86@gmail.com) (S.K.); [shiladitya.sil@gmail.com](mailto:shiladitya.sil@gmail.com) (S.S.); [subhashiniar@gmail.com](mailto:subhashiniar@gmail.com) (S.A.); [drshubha.gurudath@gmail.com](mailto:drshubha.gurudath@gmail.com) (S.G.)

<sup>6</sup> Biocon Foundation, 560100 Bangalore, India; [vidyatiwari96@gmail.com](mailto:vidyatiwari96@gmail.com) (V.T.); [tanjupat@yahoo.com](mailto:tanjupat@yahoo.com) (S.P.)

<sup>7</sup> Mazumdar Shaw Center for Translational Research (MSCTR), Mazumdar Shaw Medical Foundation, NH Health City, 560099 Bangalore, India; [dshahms@hotmail.com](mailto:dshahms@hotmail.com) (D.S.); [nameeta.shah@ms-mf.org](mailto:nameeta.shah@ms-mf.org) (N.S.)

<sup>8</sup> Department of Oral and Maxillofacial Pathology, KLE Society's Institute of Dental Sciences, 560022 Bangalore, India; [umak235@gmail.com](mailto:umak235@gmail.com)

\* Correspondence: [amritha.suresh@gmail.com](mailto:amritha.suresh@gmail.com), [amritha.suresh@ms-mf.org](mailto:amritha.suresh@ms-mf.org) (A.S.); [makuriakose@gmail.com](mailto:makuriakose@gmail.com) (M.A.K.)

† Contributed Equally.

**Citation:** James, B.L.; Sunny, S.P.; Heidari, A.E.; Ramanjinappa, R.D.; Tran, A.V.; Kankanala, S.; Sil, S.; Tiwari, V.; Patrick, S.; Shetty, V.; et al. Validation of a Point-of-Care Optical Coherence Tomography Device with Machine Learning Algorithm for Detection of Oral Potentially Malignant and Malignant Lesions. *Cancers* **2021**, *13*, x. <https://doi.org/10.3390/xxxxx>

Academic Editor: Andreas Stadlbauer, Anke Meyer-Baese and Max Zimmermann

Received: date  
Accepted: date  
Published: date

**Publisher's Note:** MDPI stays neutral with regard to jurisdictional claims in published maps and institutional affiliations.

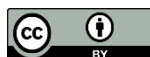

**Copyright:** © 2021 by the authors. Licensee MDPI, Basel, Switzerland. This article is an open access article distributed under the terms and conditions of the Creative Commons Attribution (CC BY) license (<http://creativecommons.org/licenses/by/4.0/>).

**Table S1.** Data set for artificial neural network (ANN) training and testing from current study and previous study data-set.

| Cases Used for ANN Based Training and Validation |               |                   |               |                   |                |                   |            |
|--------------------------------------------------|---------------|-------------------|---------------|-------------------|----------------|-------------------|------------|
| Histology                                        | Cancer        |                   | Dysplastic    |                   | Non-dysplastic |                   | Total      |
| Merged-Studies                                   | Present study | Previous study[1] | Present study | Previous study[1] | Present study  | Previous study[1] |            |
| <b>Total cases (n)</b>                           | <b>85</b>     |                   | <b>147</b>    |                   | <b>167</b>     |                   | <b>399</b> |
| <b>Study wise(n)</b>                             | 75            | 10                | 121           | 26                | 151            | 16                | 399        |
| <b>Training set (n)</b>                          | 25            | 10                | 24            | 26                | 27             | 16                | 128        |
| <b>Test Set (n)</b>                              | 50            |                   | 97            |                   | 124            |                   | 271        |
| <b>Training set (%)</b>                          | <b>41</b>     |                   | <b>34</b>     |                   | <b>26</b>      |                   | <b>32</b>  |
| <b>Test set (%)</b>                              | <b>59</b>     |                   | <b>66</b>     |                   | <b>74</b>      |                   | <b>68</b>  |

**Table 2.** Artificial neural networks ( $n = 14$ ) used for Feature Extraction and number of layers of each neural Network.

| Neural Network Used | Layers |
|---------------------|--------|
| AlexNet             | 25     |
| VGG16               | 41     |
| VGG19               | 47     |
| ResNet-18           | 72     |
| GoogLeNet           | 144    |
| MobileNetV2         | 155    |
| Xception            | 171    |
| ResNet-50           | 177    |
| InceptionV3         | 316    |
| ResNet-101          | 347    |
| DenseNet-201        | 709    |
| InceptionResnet-V2  | 825    |
| NASNetMobile        | 914    |
| NASNetLarge         | 1244   |

**Table S3.** Test sensitivity and specificity of 14 ANN-SVM models.

| Diagnosis                  | Neural Network     | Sensitivity | 95% CI      | Specificity | 95% CI     | Accuracy |
|----------------------------|--------------------|-------------|-------------|-------------|------------|----------|
| Cancer Vs Others           | NASNetLarge        | 84.5        | 70.9–92.8   | 72.5        | 66.2–78.2  | 74.5618  |
|                            | DenseNet-201       | 86.2        | 74.62–93.85 | 81.4        | 74.7–85.55 | 81.936   |
|                            | InceptionResNet-v2 | 94.4        | 83.5–98.7   | 66.4        | 59.9–72.5  | 71.3516  |
|                            | Xception           | 84.3        | 70.9–92.8   | 78.2        | 72.2–83.3  | 79.2194  |
|                            | ResNet-101         | 78.6        | 64.0–88.5   | 83.8        | 78.4–88.4  | 82.7888  |
|                            | NASNetMobile       | 82.5        | 68.6–91.4   | 84.7        | 79.4–89.1  | 84.2304  |
|                            | VGG19              | 96.6        | 86.3–99.5   | 62.0        | 55.4–68.3  | 68.1282  |
|                            | VGG16              | 86.3        | 73.3–94.2   | 74.7        | 68.5–80.2  | 76.7094  |
|                            | MobileNetV2        | 92.4        | 80.8–97.8   | 63.8        | 57.2–70.0  | 68.8432  |
|                            | ResNet-50          | 98.5        | 89.4–99.9   | 52.0        | 45.3–58.6  | 60.2554  |
|                            | ResNet-18          | 90.8        | 78.2–96.7   | 68.1        | 61.7–74.1  | 72.0584  |
|                            | GoogLeNet          | 90.6        | 78.2–96.7   | 51.5        | 44.9–58.2  | 58.4546  |
|                            | AlexNet            | 86.7        | 73.3–94.2   | 66.4        | 59.9–72.5  | 69.9116  |
|                            | InceptionV3        | 92.4        | 80.8–97.8   | 69.0        | 62.6–74.9  | 73.14    |
| Dysplasia Vs Non-Dysplasia | NASNetLarge        | 80.4        | 71.1–87.8   | 57.3        | 48.1–66.1  | 67.446   |
|                            | DenseNet-201       | 83.5        | 74.6–90.3   | 81.5        | 73.5–87.9  | 82.3564  |
|                            | InceptionResNet-v2 | 88.7        | 80.6–94.2   | 63.7        | 54.6–72.2  | 74.688   |
|                            | Xception           | 93.8        | 87.0–97.7   | 47.6        | 38.5–56.7  | 67.9212  |
|                            | ResNet-101         | 90.7        | 83.1–95.7   | 62.9        | 53.8–71.4  | 75.1408  |
|                            | NASNetMobile       | 70.1        | 60.0–79.0   | 66.1        | 57.1–74.4  | 67.8768  |
|                            | VGG19              | 88.7        | 80.6–94.2   | 52.4        | 43.3–61.5  | 68.3656  |

|                                                 |                    |      |           |      |           |          |
|-------------------------------------------------|--------------------|------|-----------|------|-----------|----------|
| High Grade dysplasia Vs Low Grade/Benign/Normal | VGG16              | 77.3 | 67.7–85.2 | 61.3 | 52.1–69.9 | 68.3432  |
|                                                 | MobileNetV2        | 65.0 | 54.6–74.4 | 79.8 | 71.7–86.5 | 73.2884  |
|                                                 | ResNet-50          | 94.9 | 88.4–98.3 | 48.4 | 39.3–57.5 | 68.8324  |
|                                                 | ResNet-18          | 87.6 | 79.4–93.4 | 53.2 | 44.1–62.2 | 68.366   |
|                                                 | GoogLeNet          | 92.8 | 85.7–97.0 | 49.2 | 40.1–58.3 | 68.3696  |
|                                                 | AlexNet            | 80.4 | 71.1–87.8 | 62.1 | 52.9–70.7 | 70.1564  |
|                                                 | InceptionV3        | 80.4 | 71.1–87.8 | 68.6 | 59.6–76.6 | 73.7684  |
|                                                 | NASNetLarge        | 57.3 | 45.4–68.7 | 76.0 | 68.3–82.7 | 69.6907  |
|                                                 | DenseNet-201       | 94.7 | 86.9–98.5 | 35.6 | 27.9–44.0 | 55.63795 |
|                                                 | InceptionResNet-v2 | 82.7 | 72.2–90.4 | 68.5 | 60.3–75.9 | 73.29702 |
|                                                 | Xception           | 92.0 | 83.4–97.0 | 58.9 | 50.5–67.0 | 70.1209  |
|                                                 | ResNet-101         | 94.7 | 86.9–98.5 | 49.3 | 41.0–57.7 | 64.69365 |
|                                                 | NASNetMobile       | 80.0 | 69.2–88.4 | 61.6 | 53.2–69.6 | 67.86404 |
|                                                 | VGG19              | 96.0 | 88.8–99.2 | 37.7 | 29.8–46.1 | 57.44387 |
|                                                 | VGG16              | 76.0 | 64.7–85.1 | 63.7 | 55.3–71.5 | 67.8697  |
|                                                 | MobileNetV2        | 94.7 | 86.9–98.5 | 30.8 | 23.5–39.0 | 52.46515 |
|                                                 | ResNet-50          | 45.3 | 33.8–57.3 | 87.7 | 81.2–92.5 | 73.31674 |
|                                                 | ResNet-18          | 73.3 | 61.9–82.9 | 73.3 | 65.3–80.3 | 73.30356 |
|                                                 | GoogLeNet          | 77.3 | 66.2–86.2 | 61.6 | 53.2–69.6 | 66.95891 |
|                                                 | AlexNet            | 64.0 | 52.1–74.8 | 76.0 | 68.3–82.7 | 71.95183 |
|                                                 | InceptionV3        | 90.7 | 81.7–96.2 | 43.8 | 35.6–52.3 | 59.71537 |

1. Sunny, S.P.; Agarwal, S.; James, B.L.; Heidari, E.; Muralidharan, A.; Yadav, V.; Shetty, V.; Chen, Z.; Hedne, N.; et al. Intra-operative point-of-procedure delineation of oral cancer margins using optical coherence tomography. *Oral. Oncol.* **2019**, *92*, 12–19. doi: 10.1016/j.oraloncology.2019.03.006.
