# Supplementary material for: Validation of a Point-of-Care Optical Coherence Tomography Device with Machine Learning Algorithm for Detection of Oral Potentially Malignant and Malignant Lesions
Source: MDPI journal article supplement (doi:10.3390/cancers13143583), 2021-07-17
Supplement: s1 [file s1]

**A. Normal oral mucosal sub-sites**

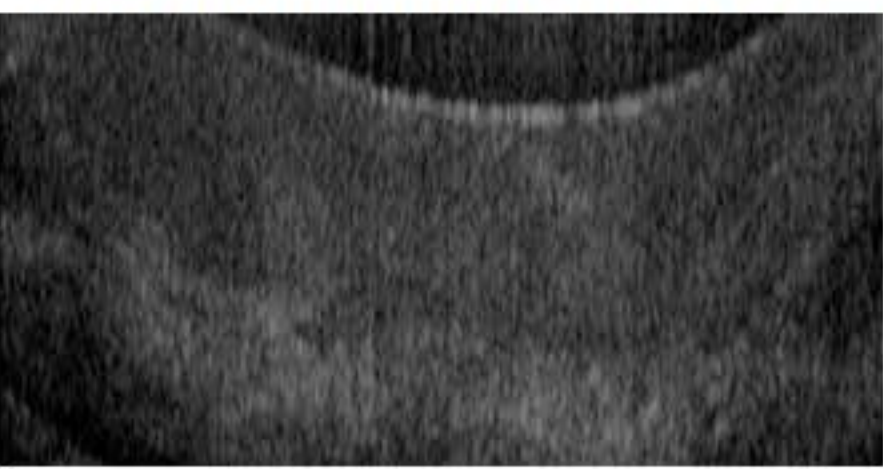

Buccal mucosa

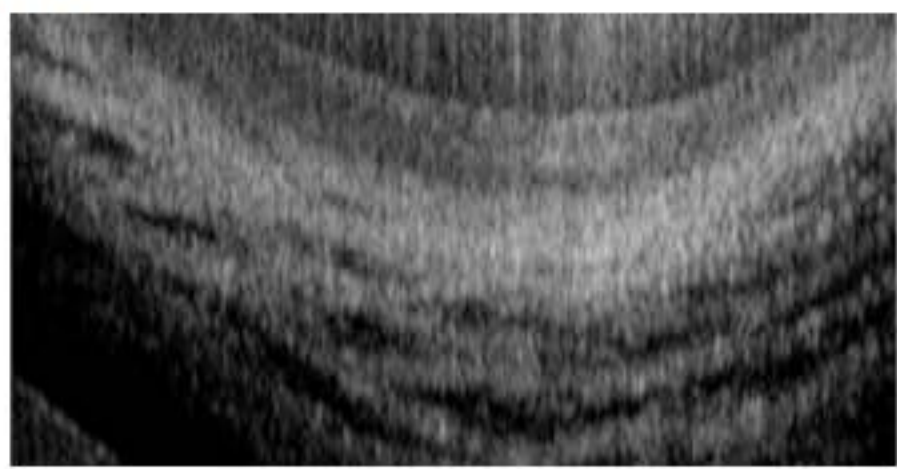

Floor of the mouth

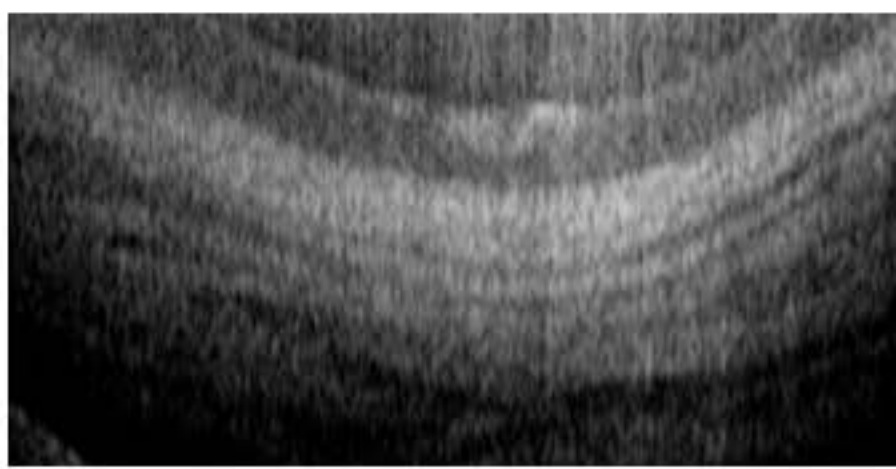

Gingiva

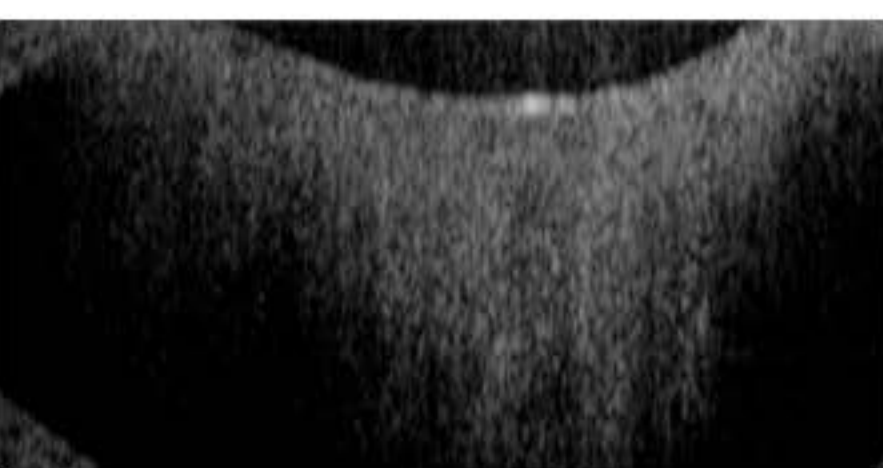

Dorsal Tongue

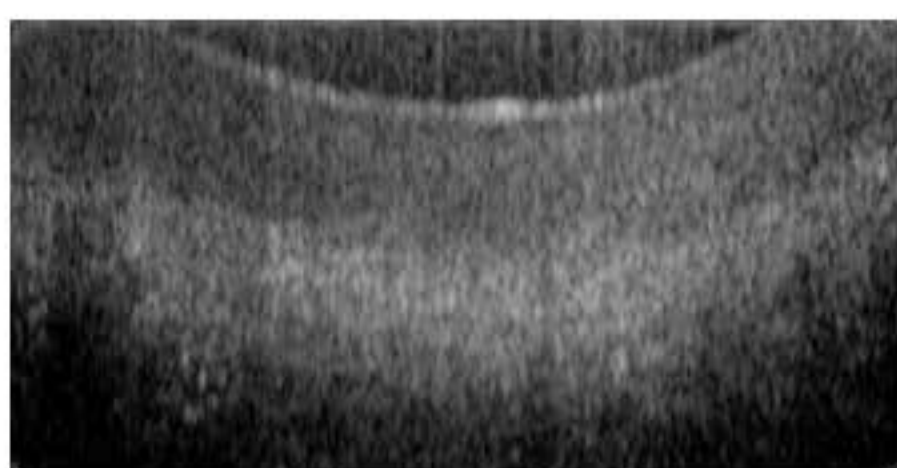

Ventral Tongue

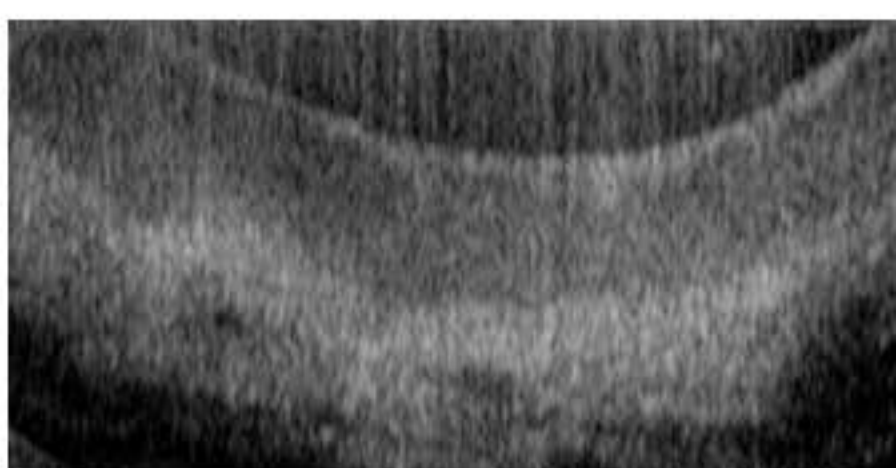

Retro-molar trigone

**B. Multiple tongue lesions**

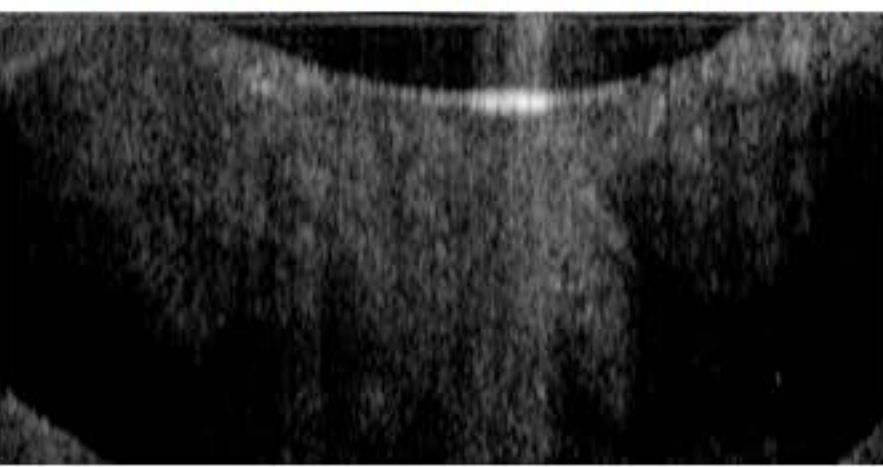

Normal

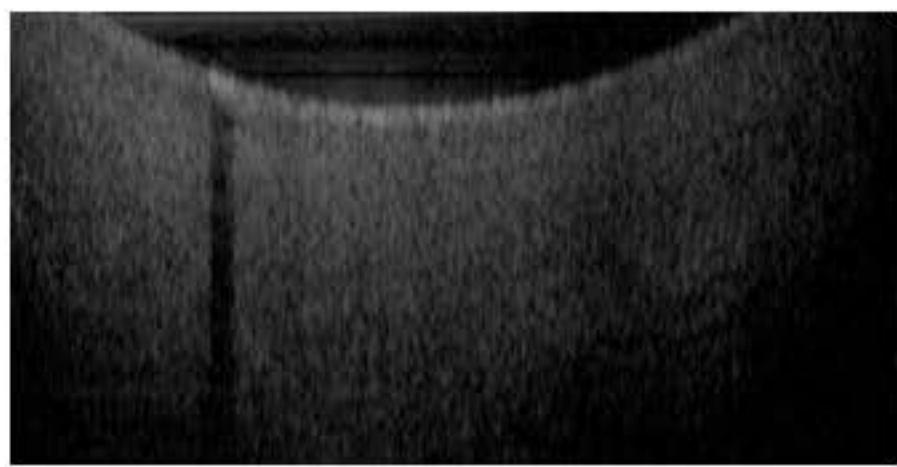

Aphthous ulcer

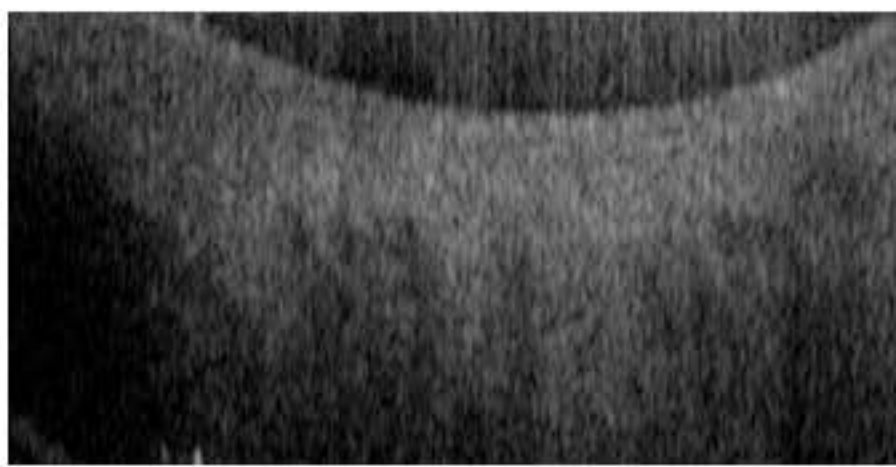

Lichen Planus

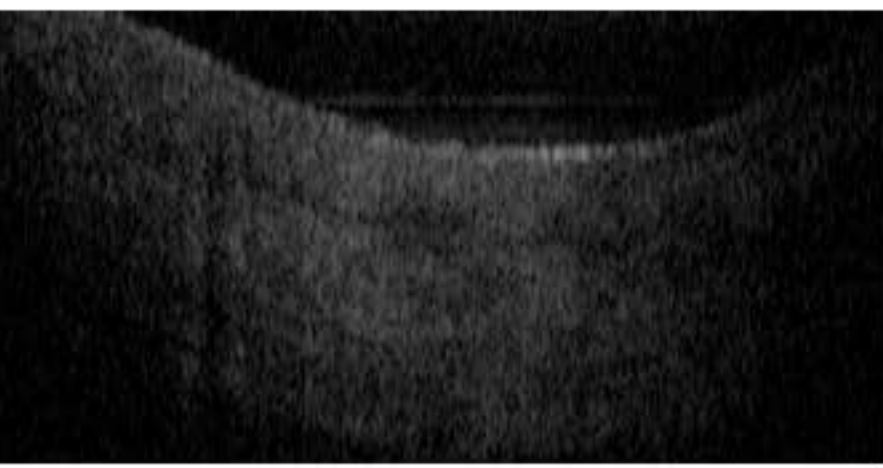

Dysplasia

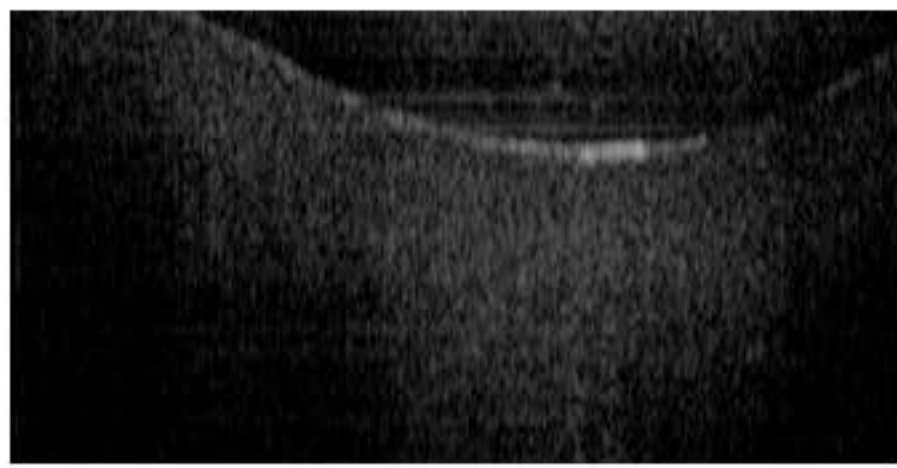

OSCC
