# Supplementary material for: Validation of a Point-of-Care Optical Coherence Tomography Device with Machine Learning Algorithm for Detection of Oral Potentially Malignant and Malignant Lesions
Source: MDPI journal article supplement (doi:10.3390/cancers13143583), 2021-07-17

AlexNet

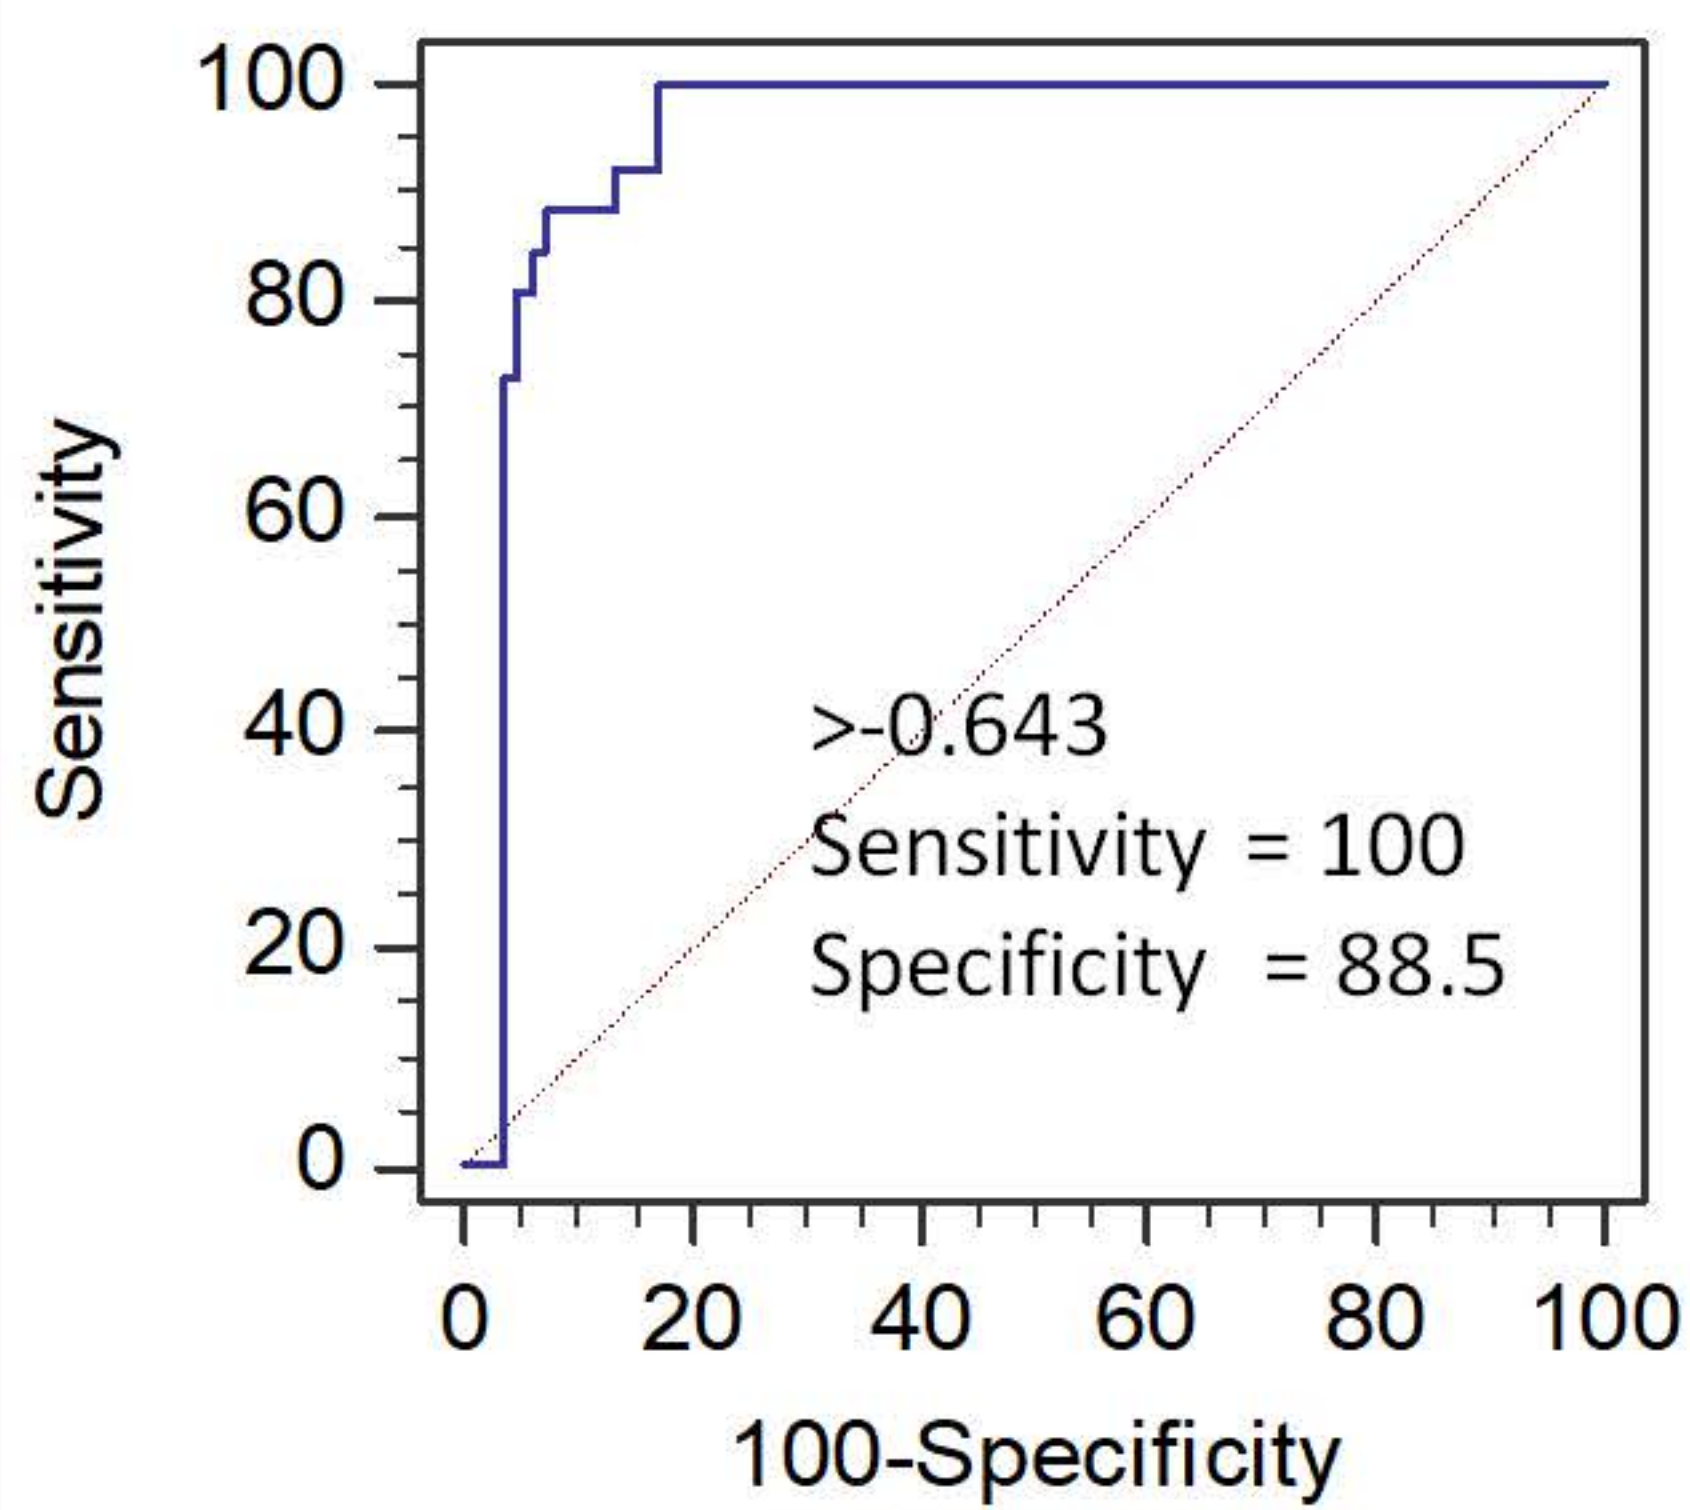

DenseNet-201

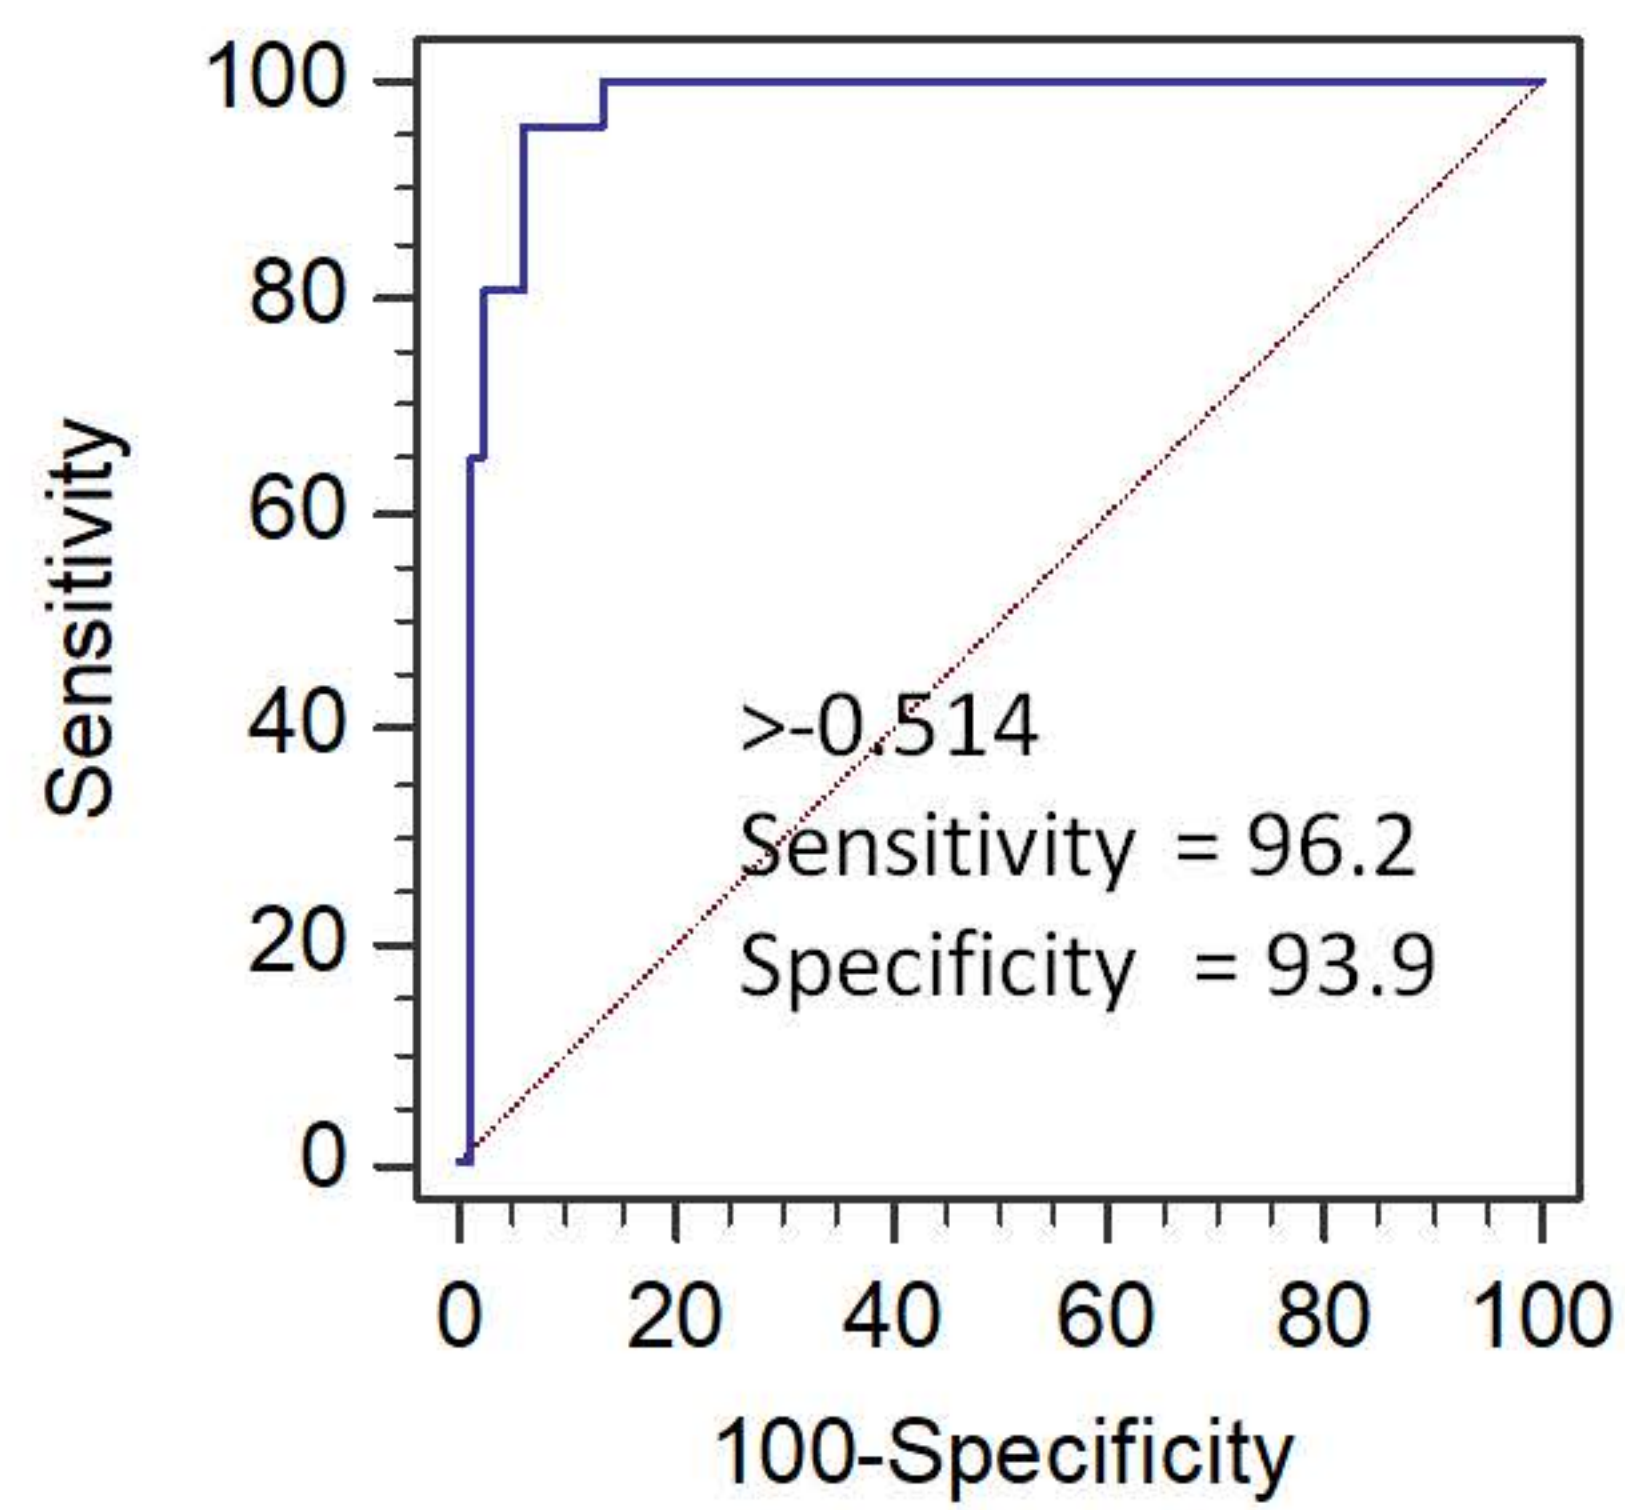

GoogLeNet

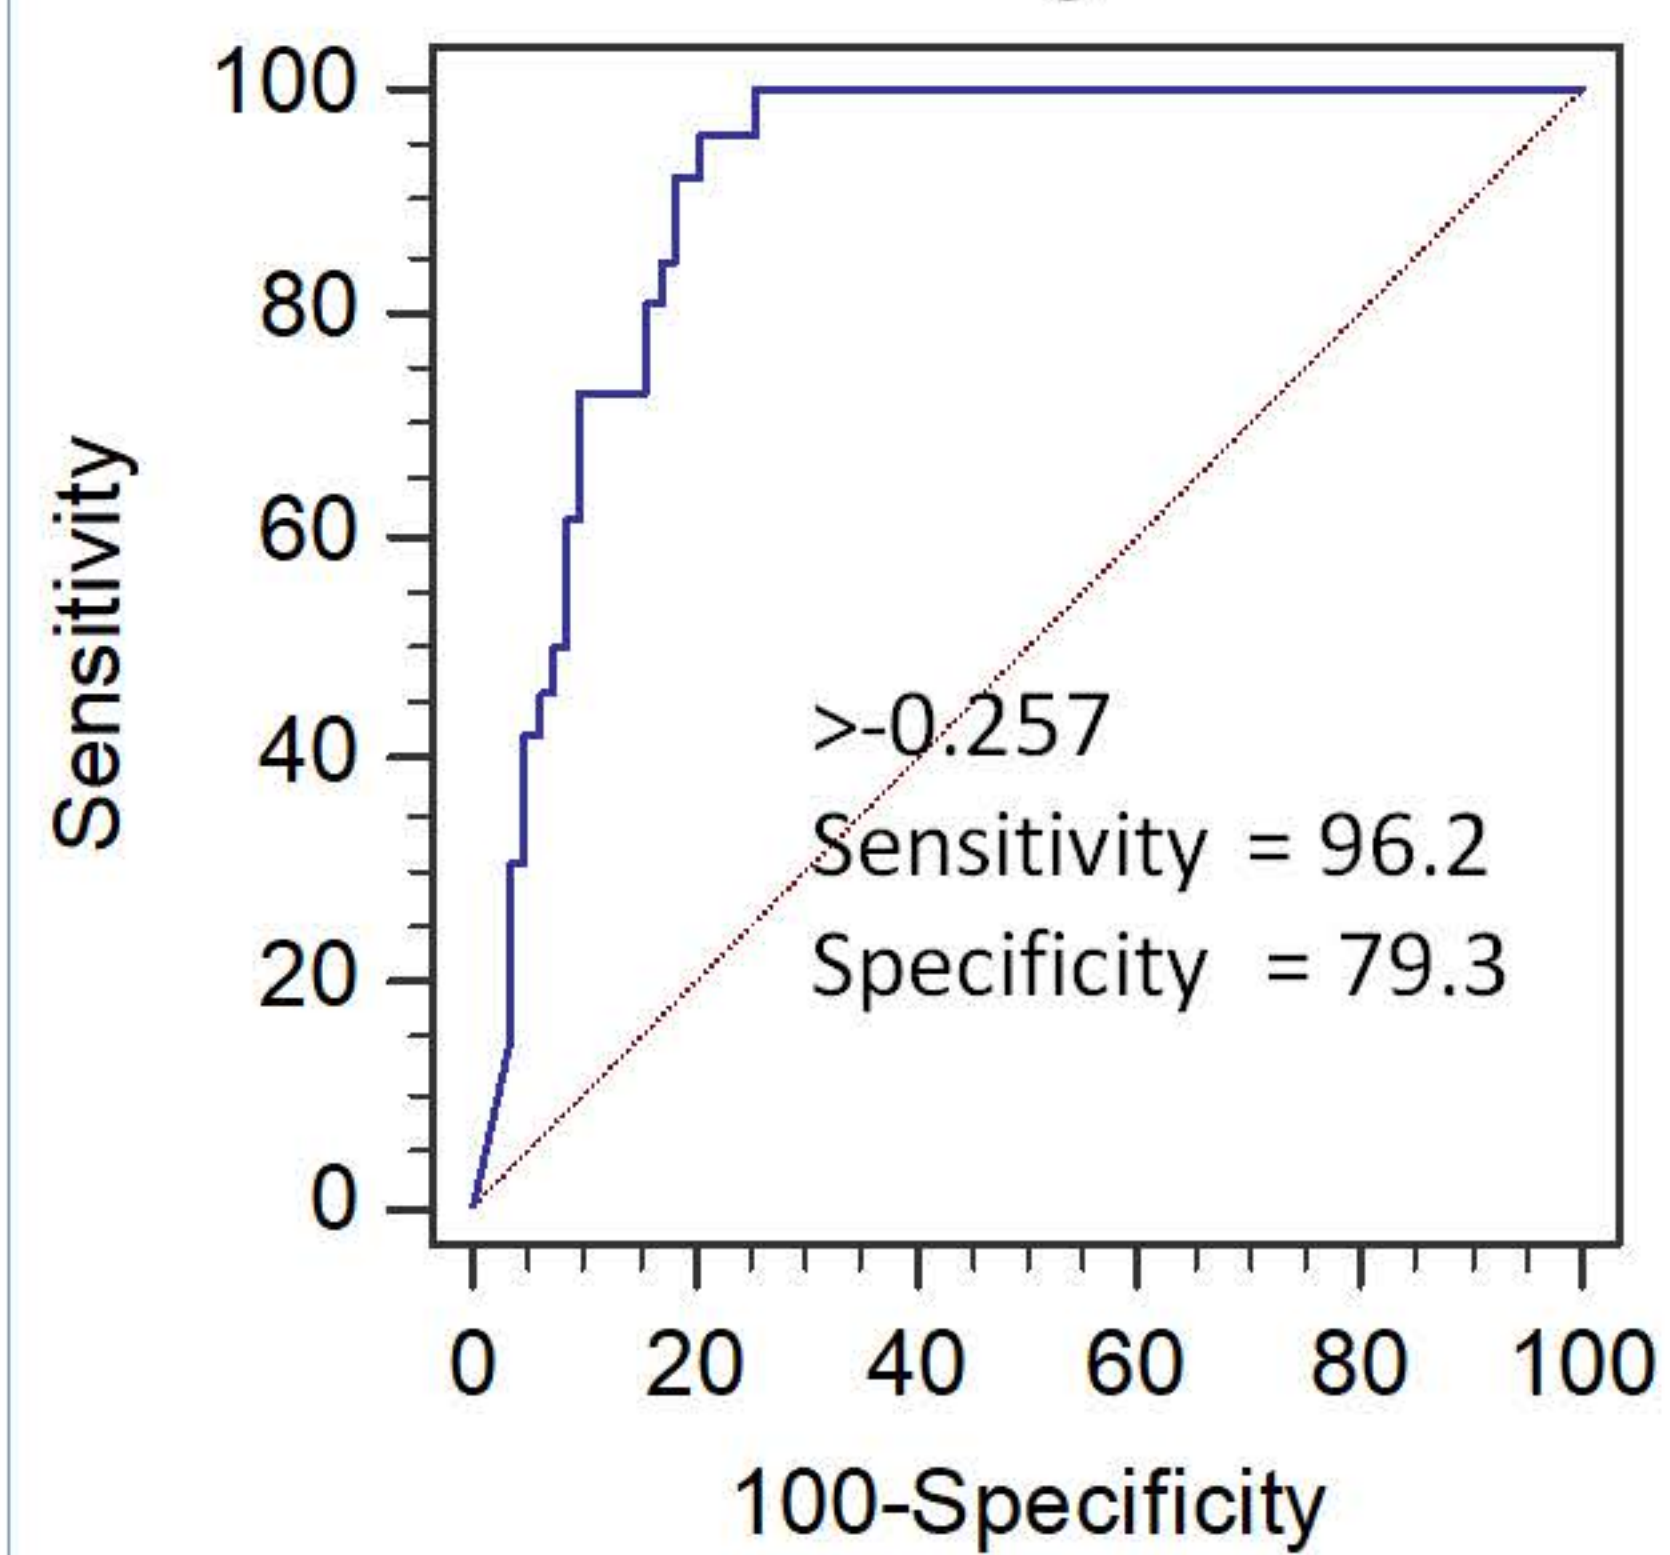

InceptionV3

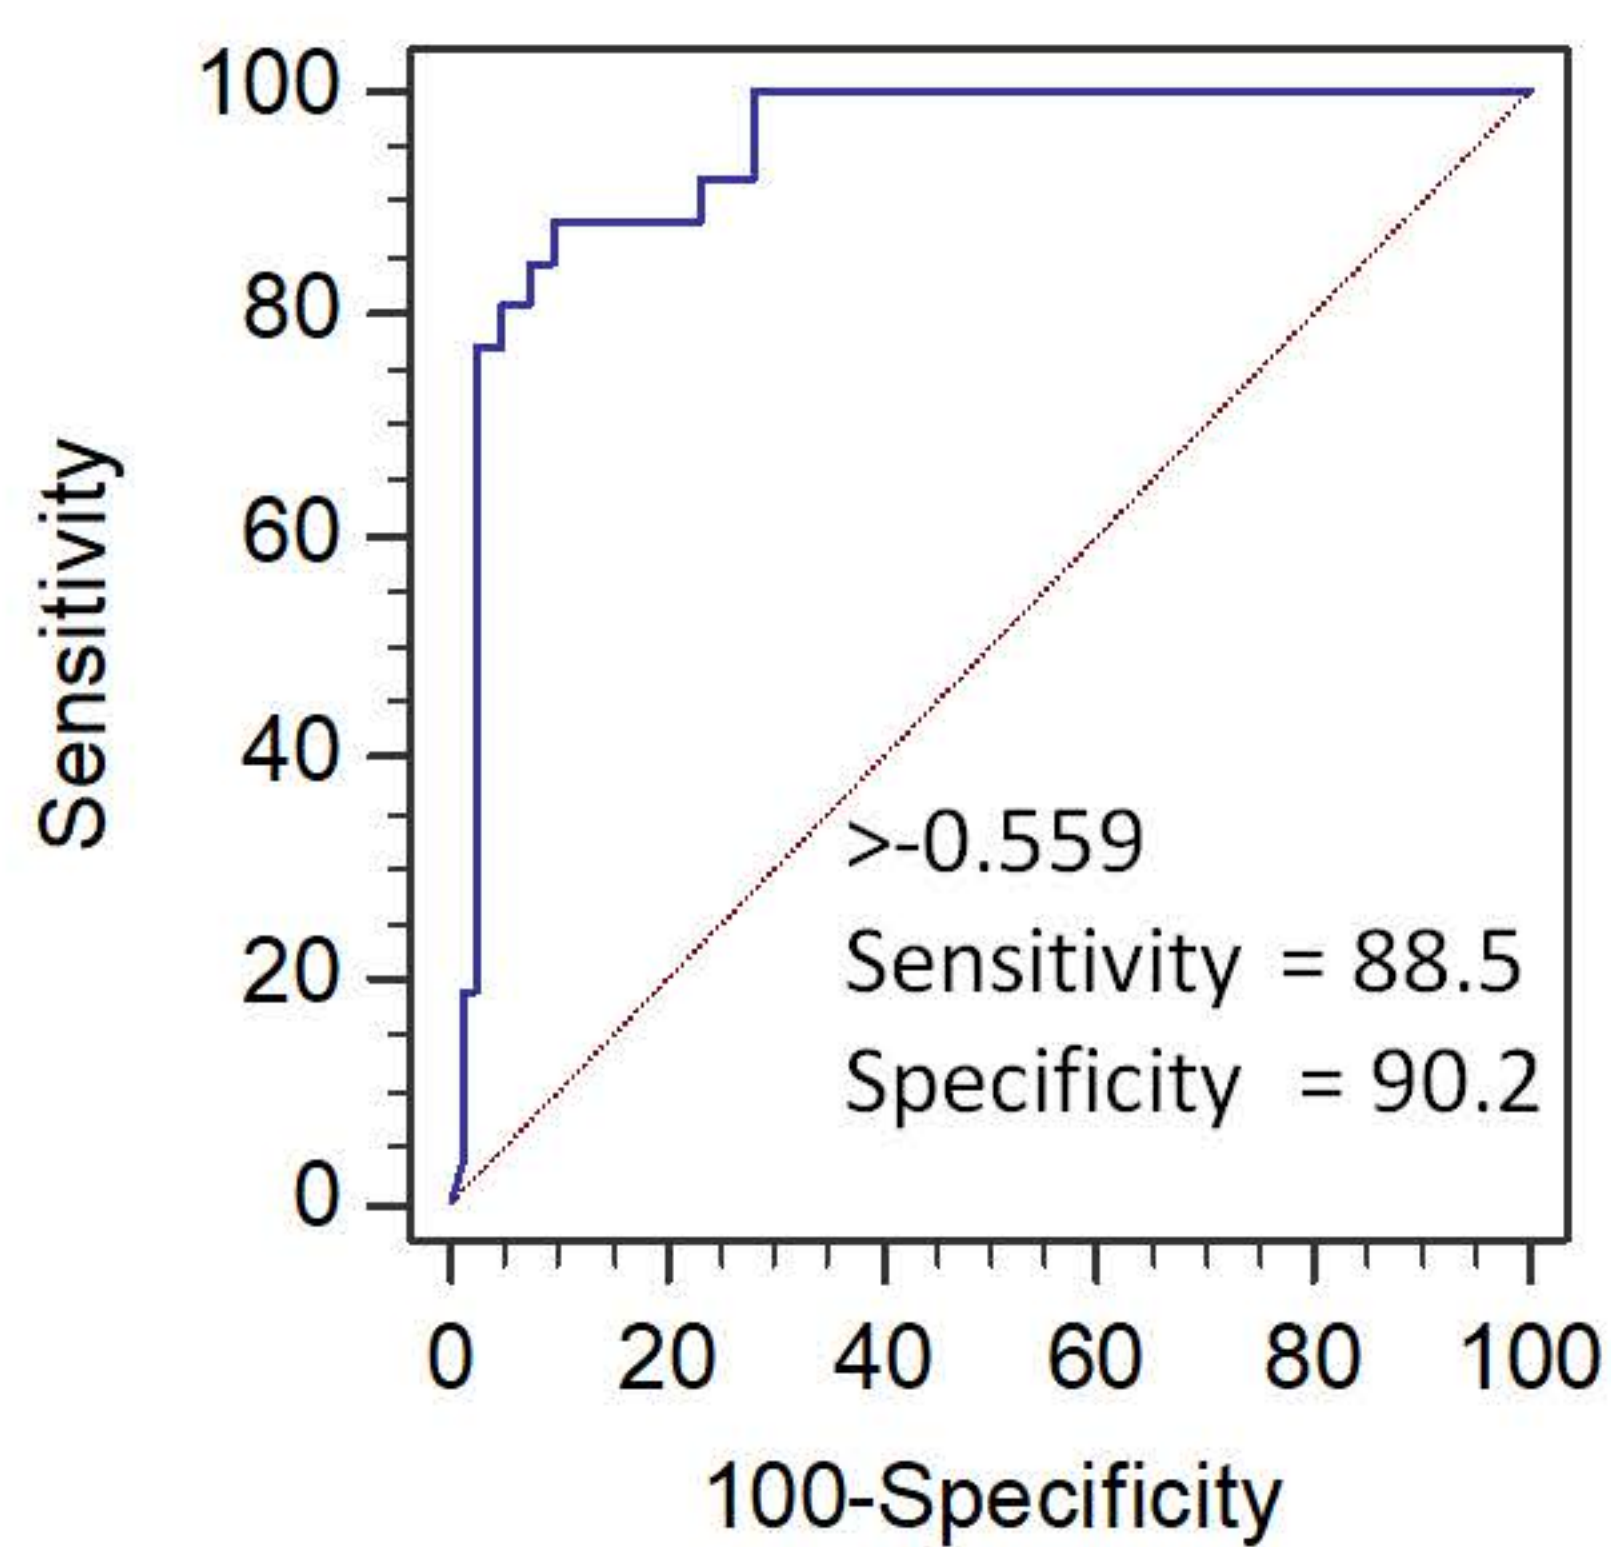

MobileNetV2

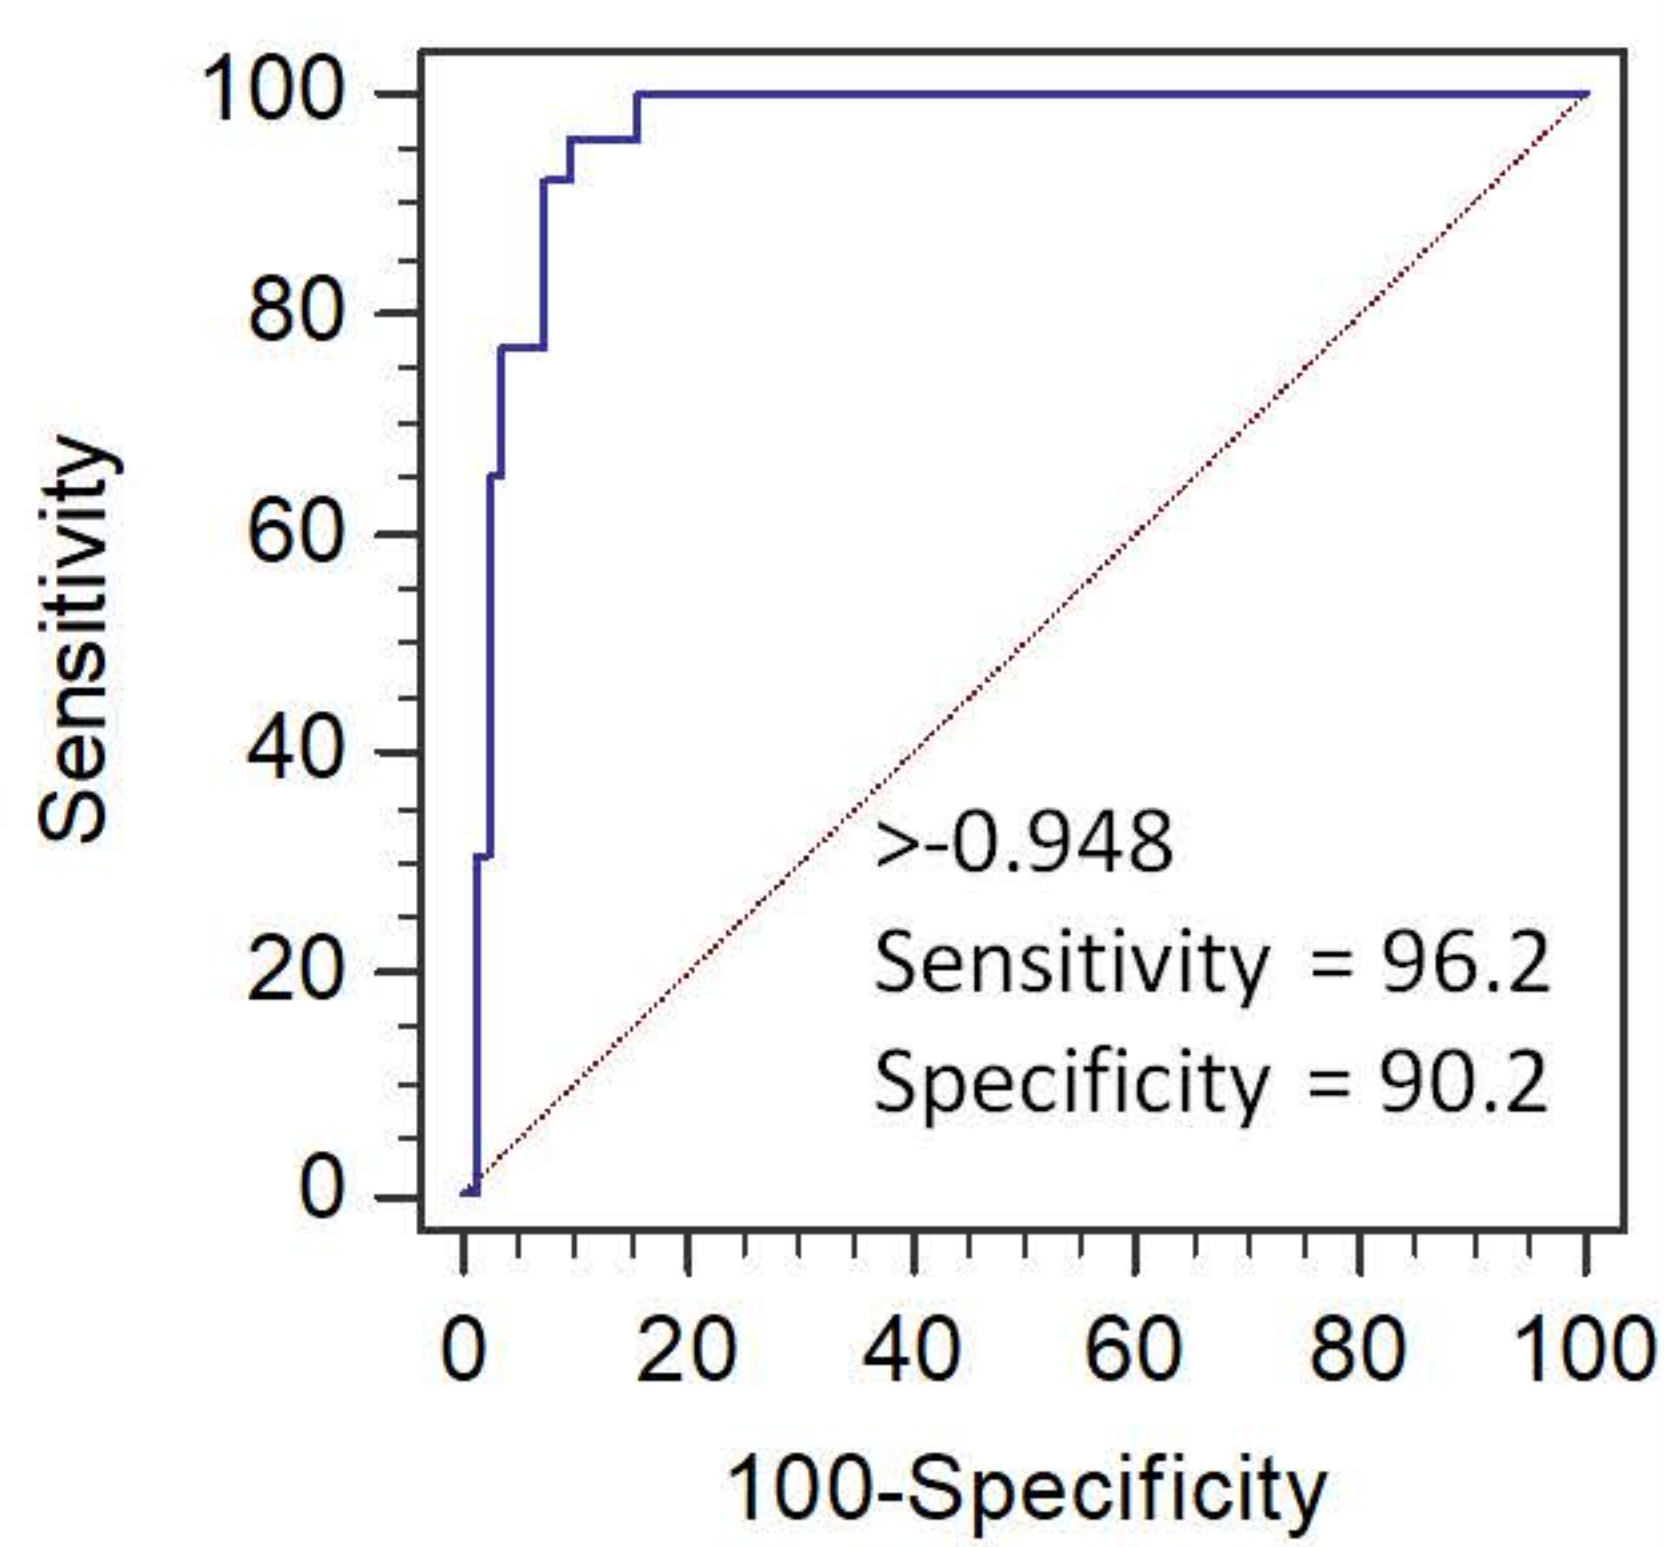

NASNetLarge

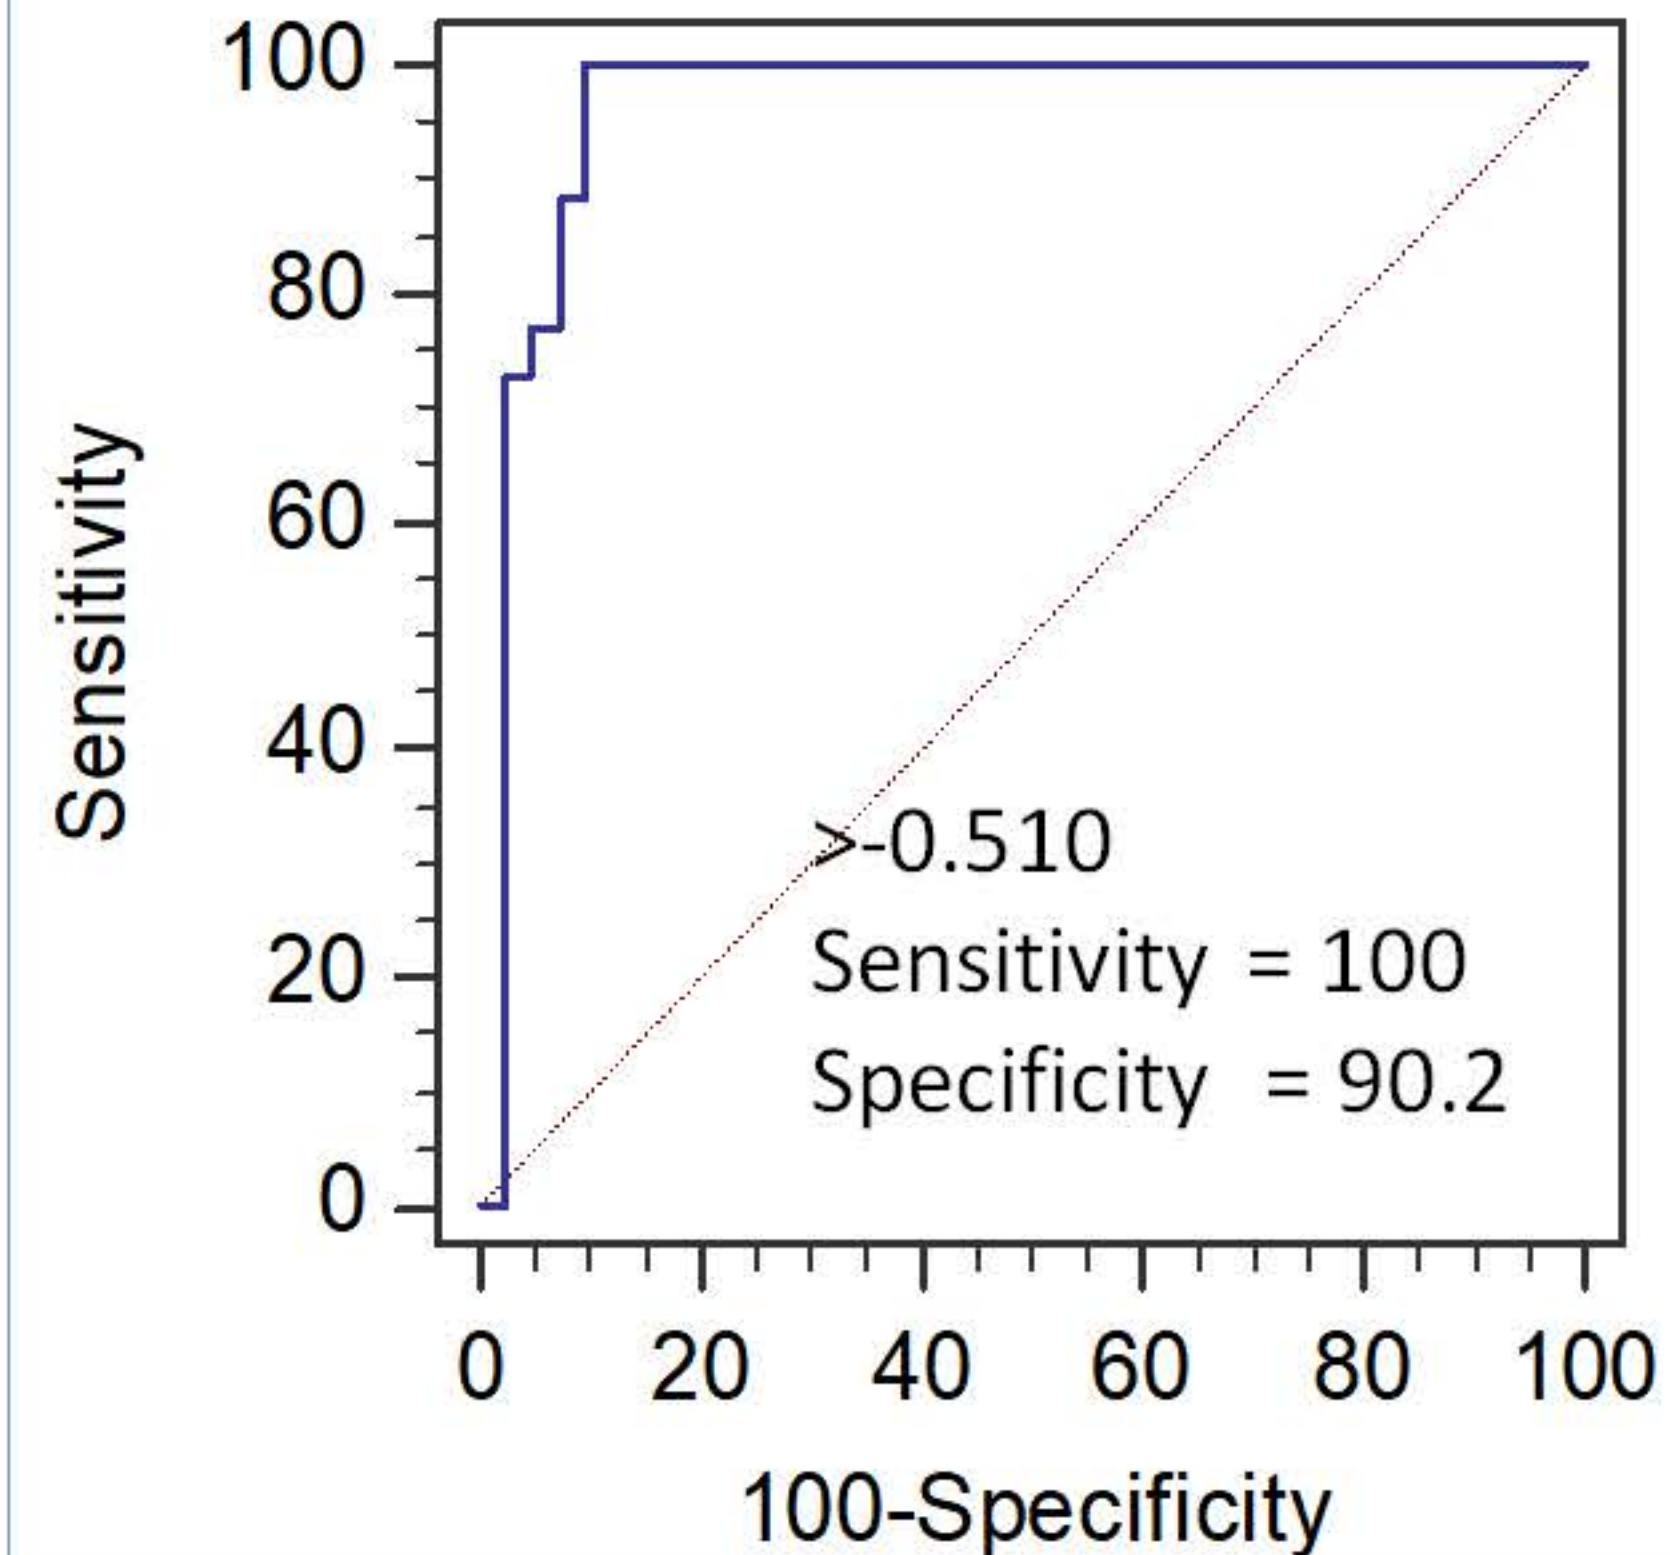

InceptionResNetV2

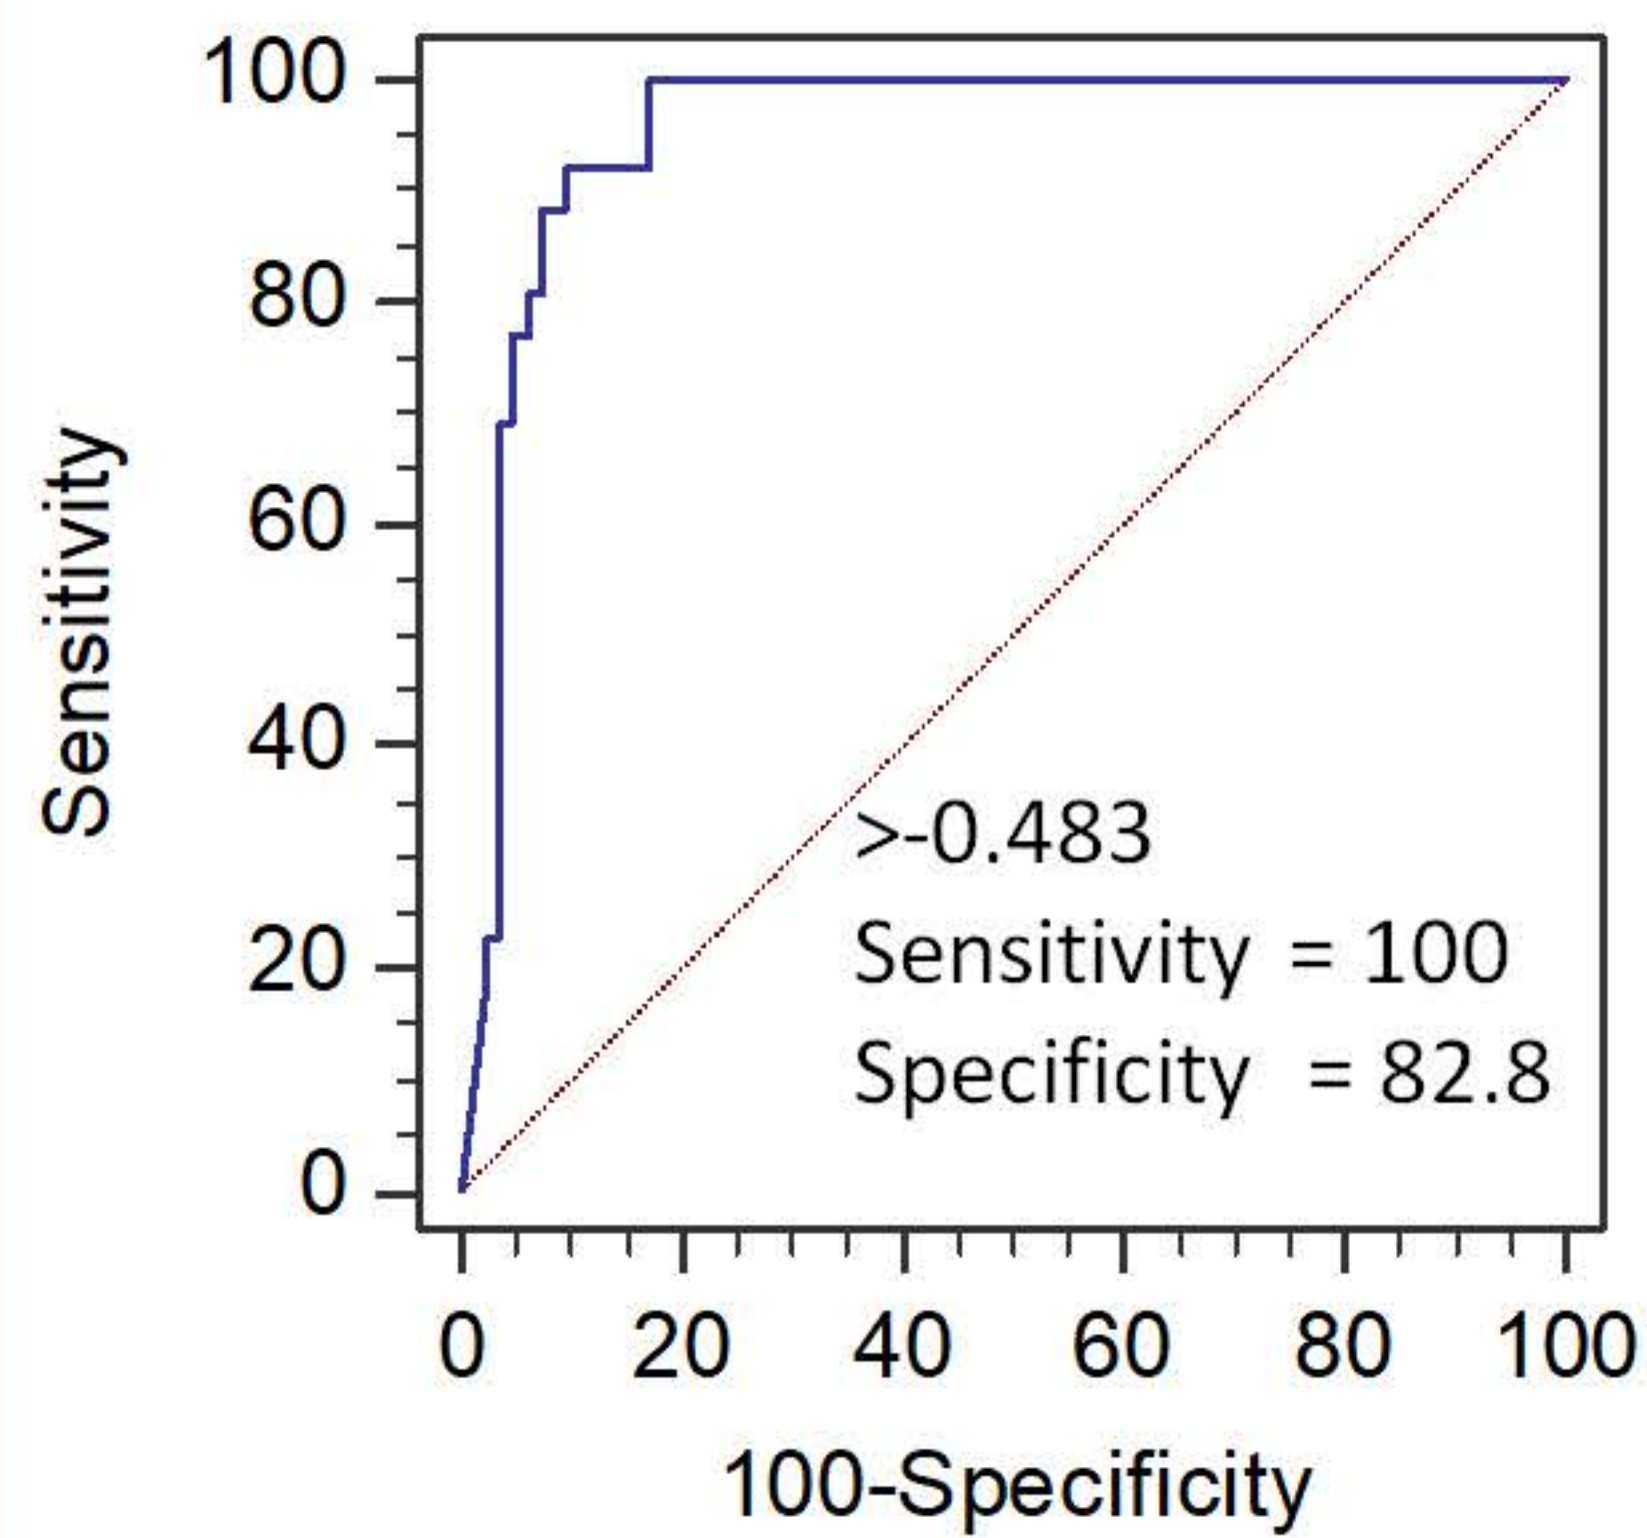

NasNetMobile

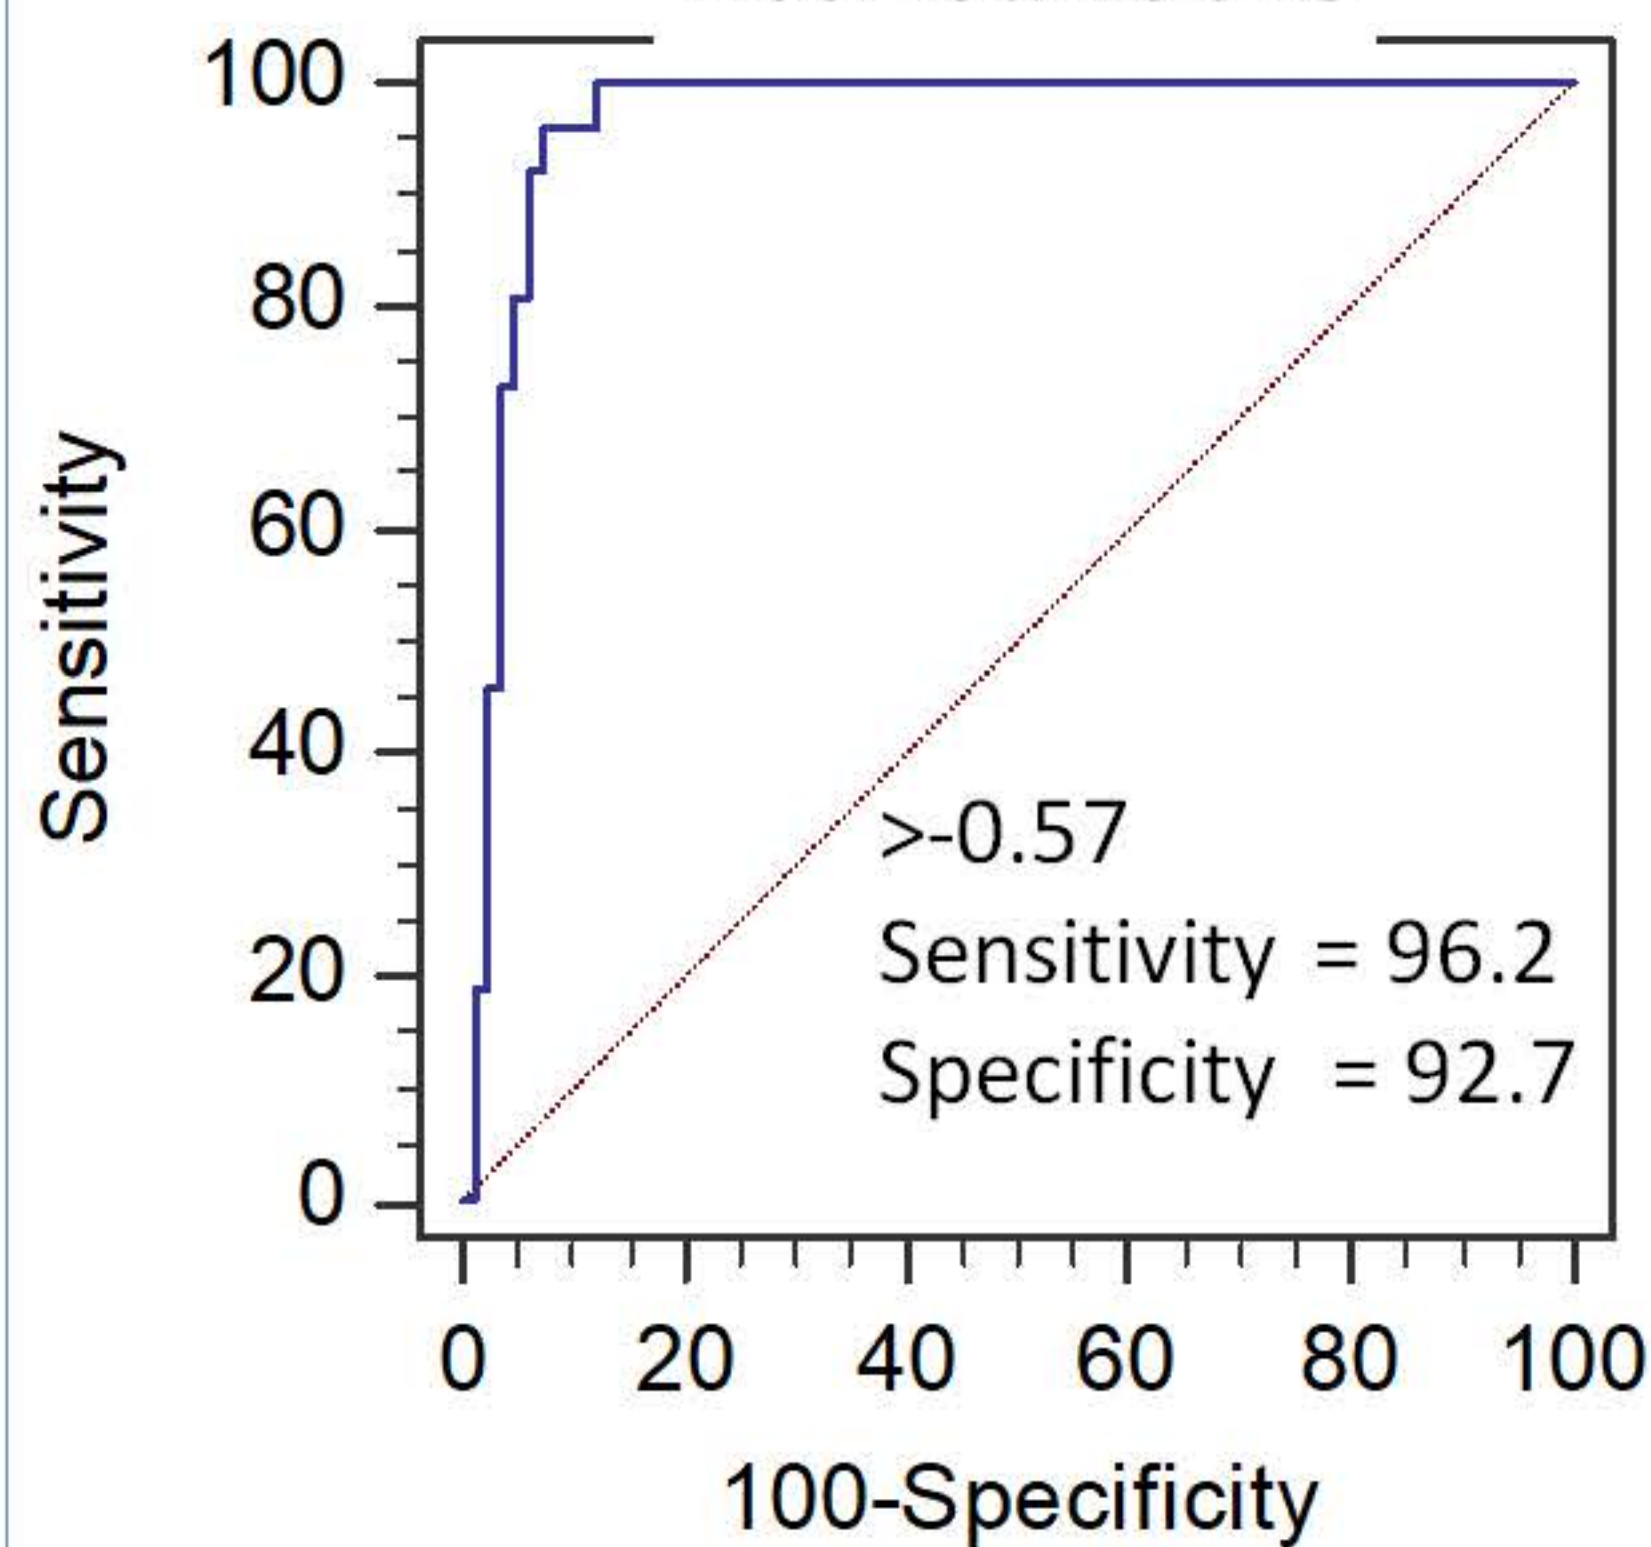

ResNet-101

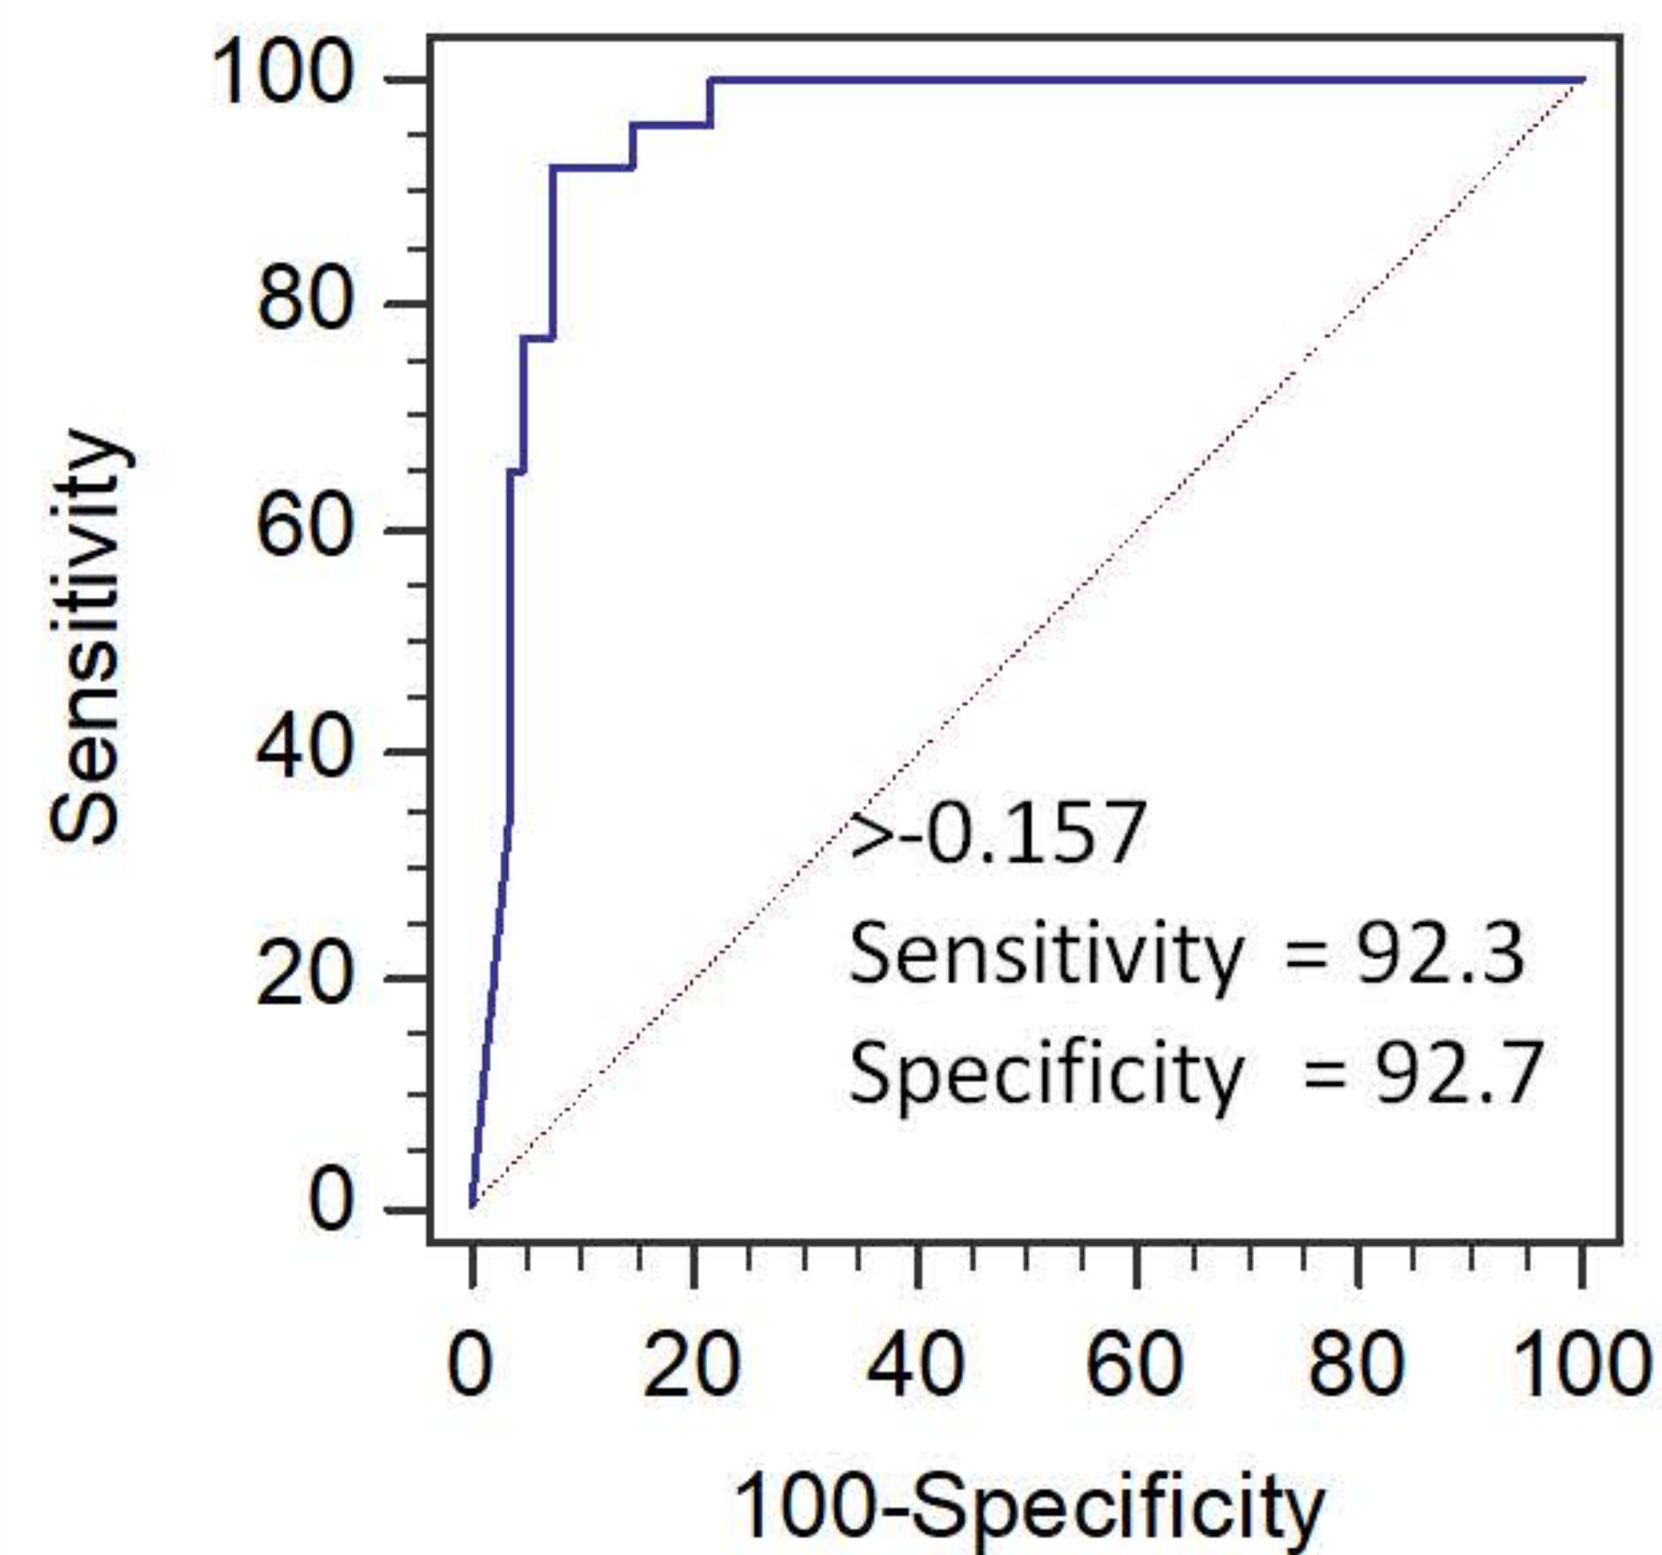

ResNet-18

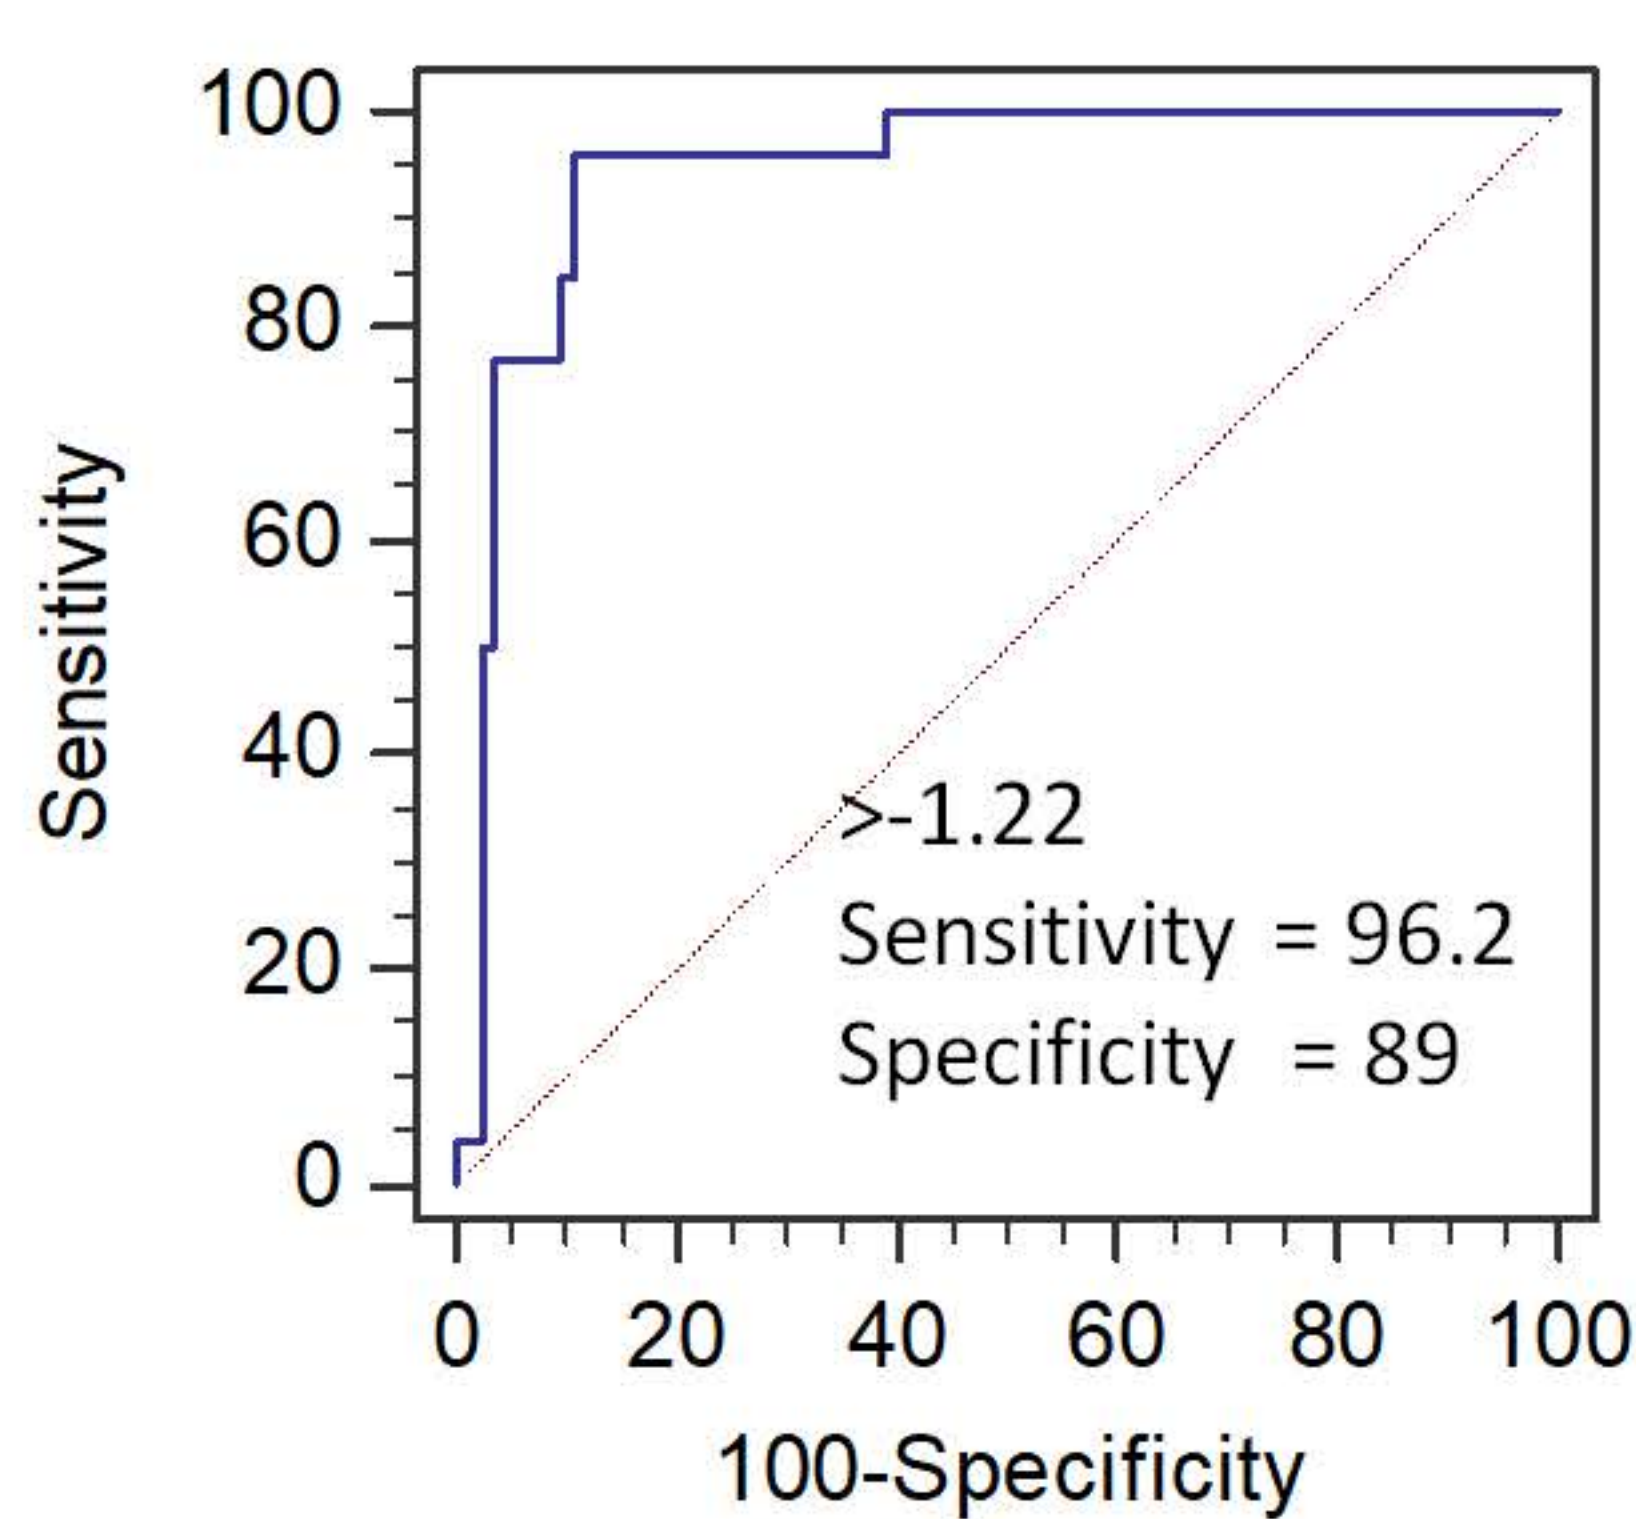

ResNet-50

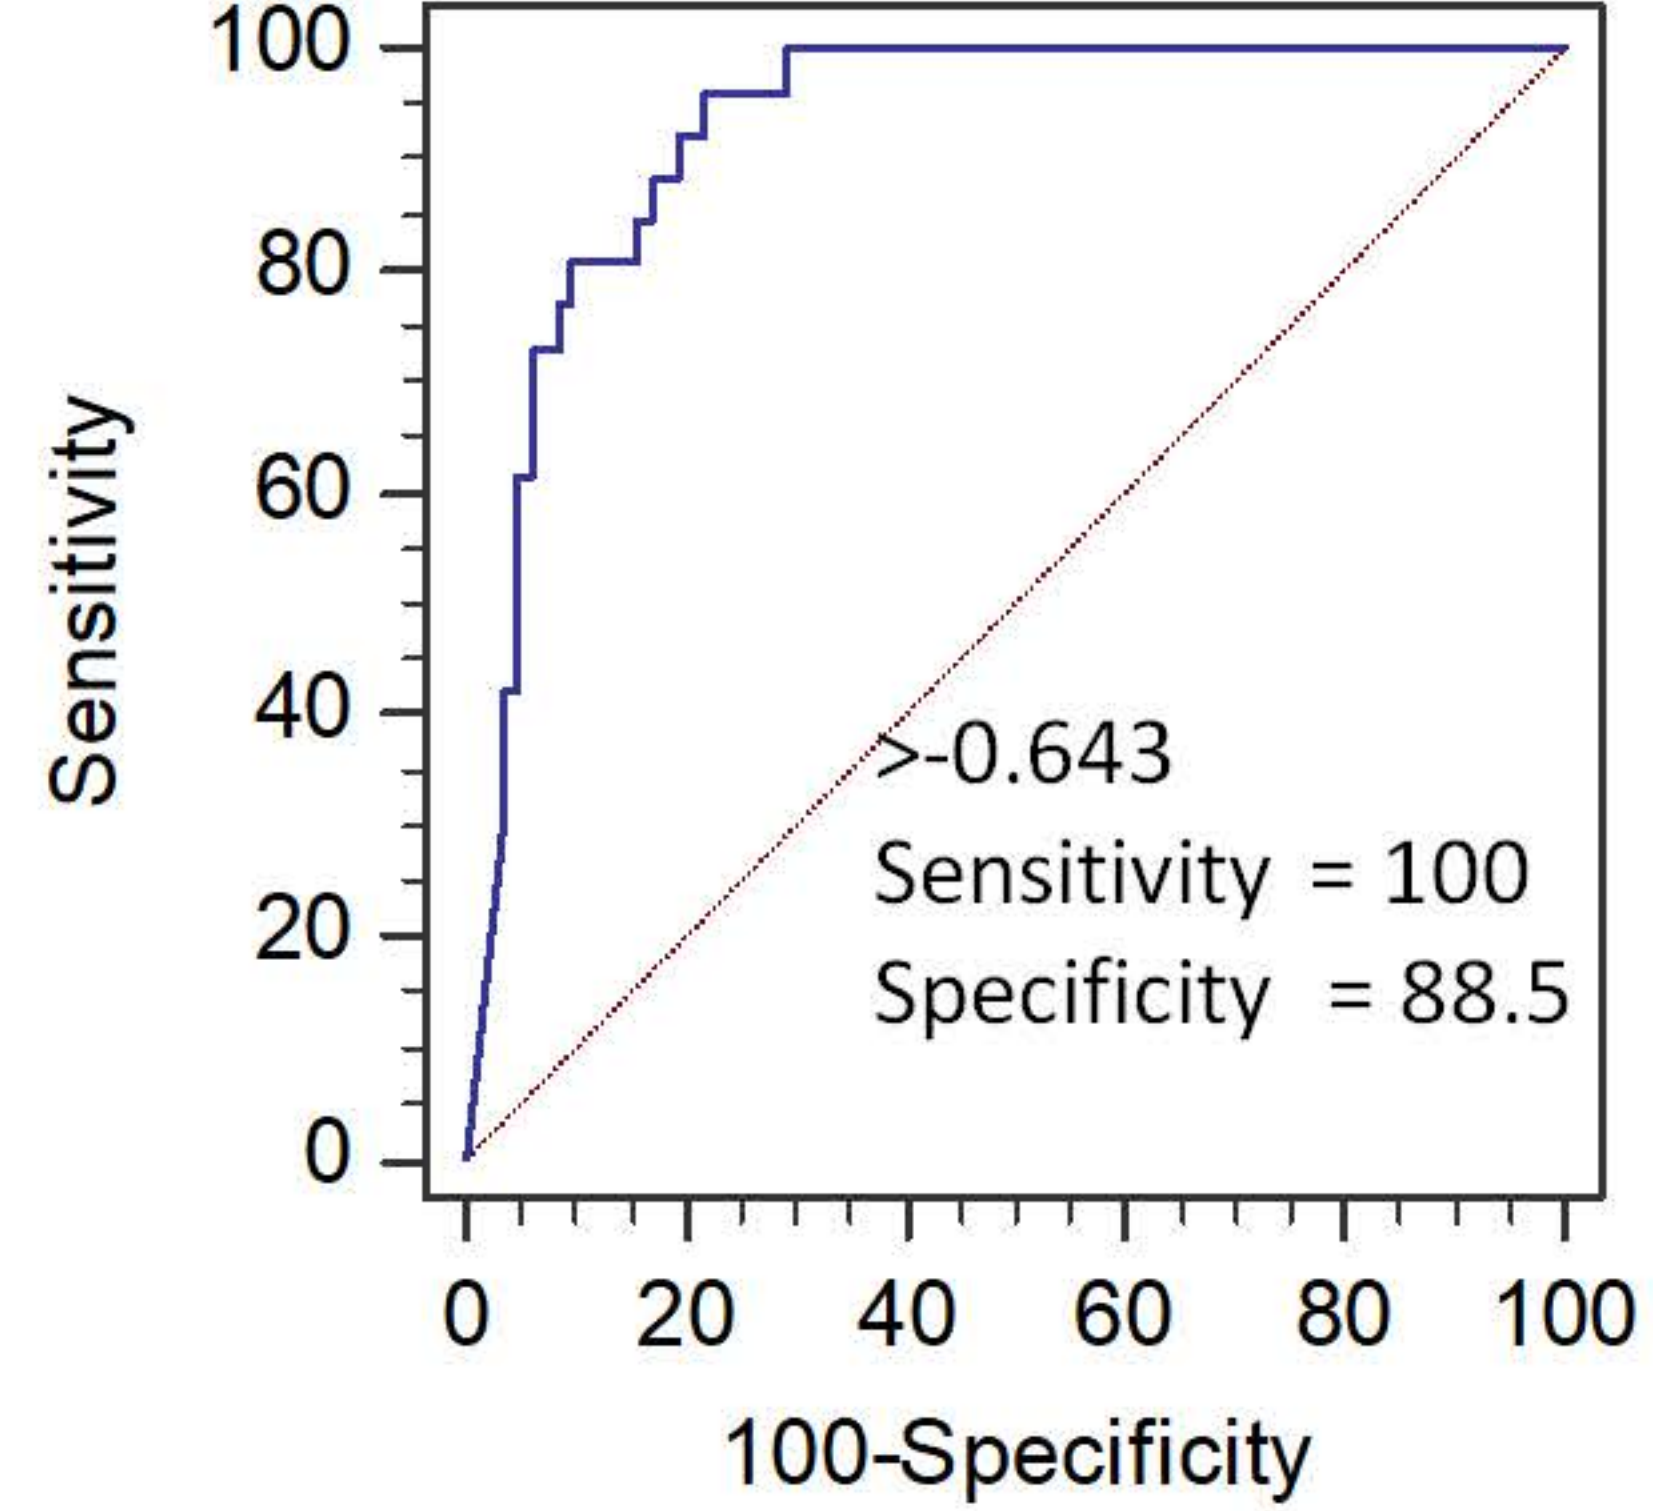

VGG16

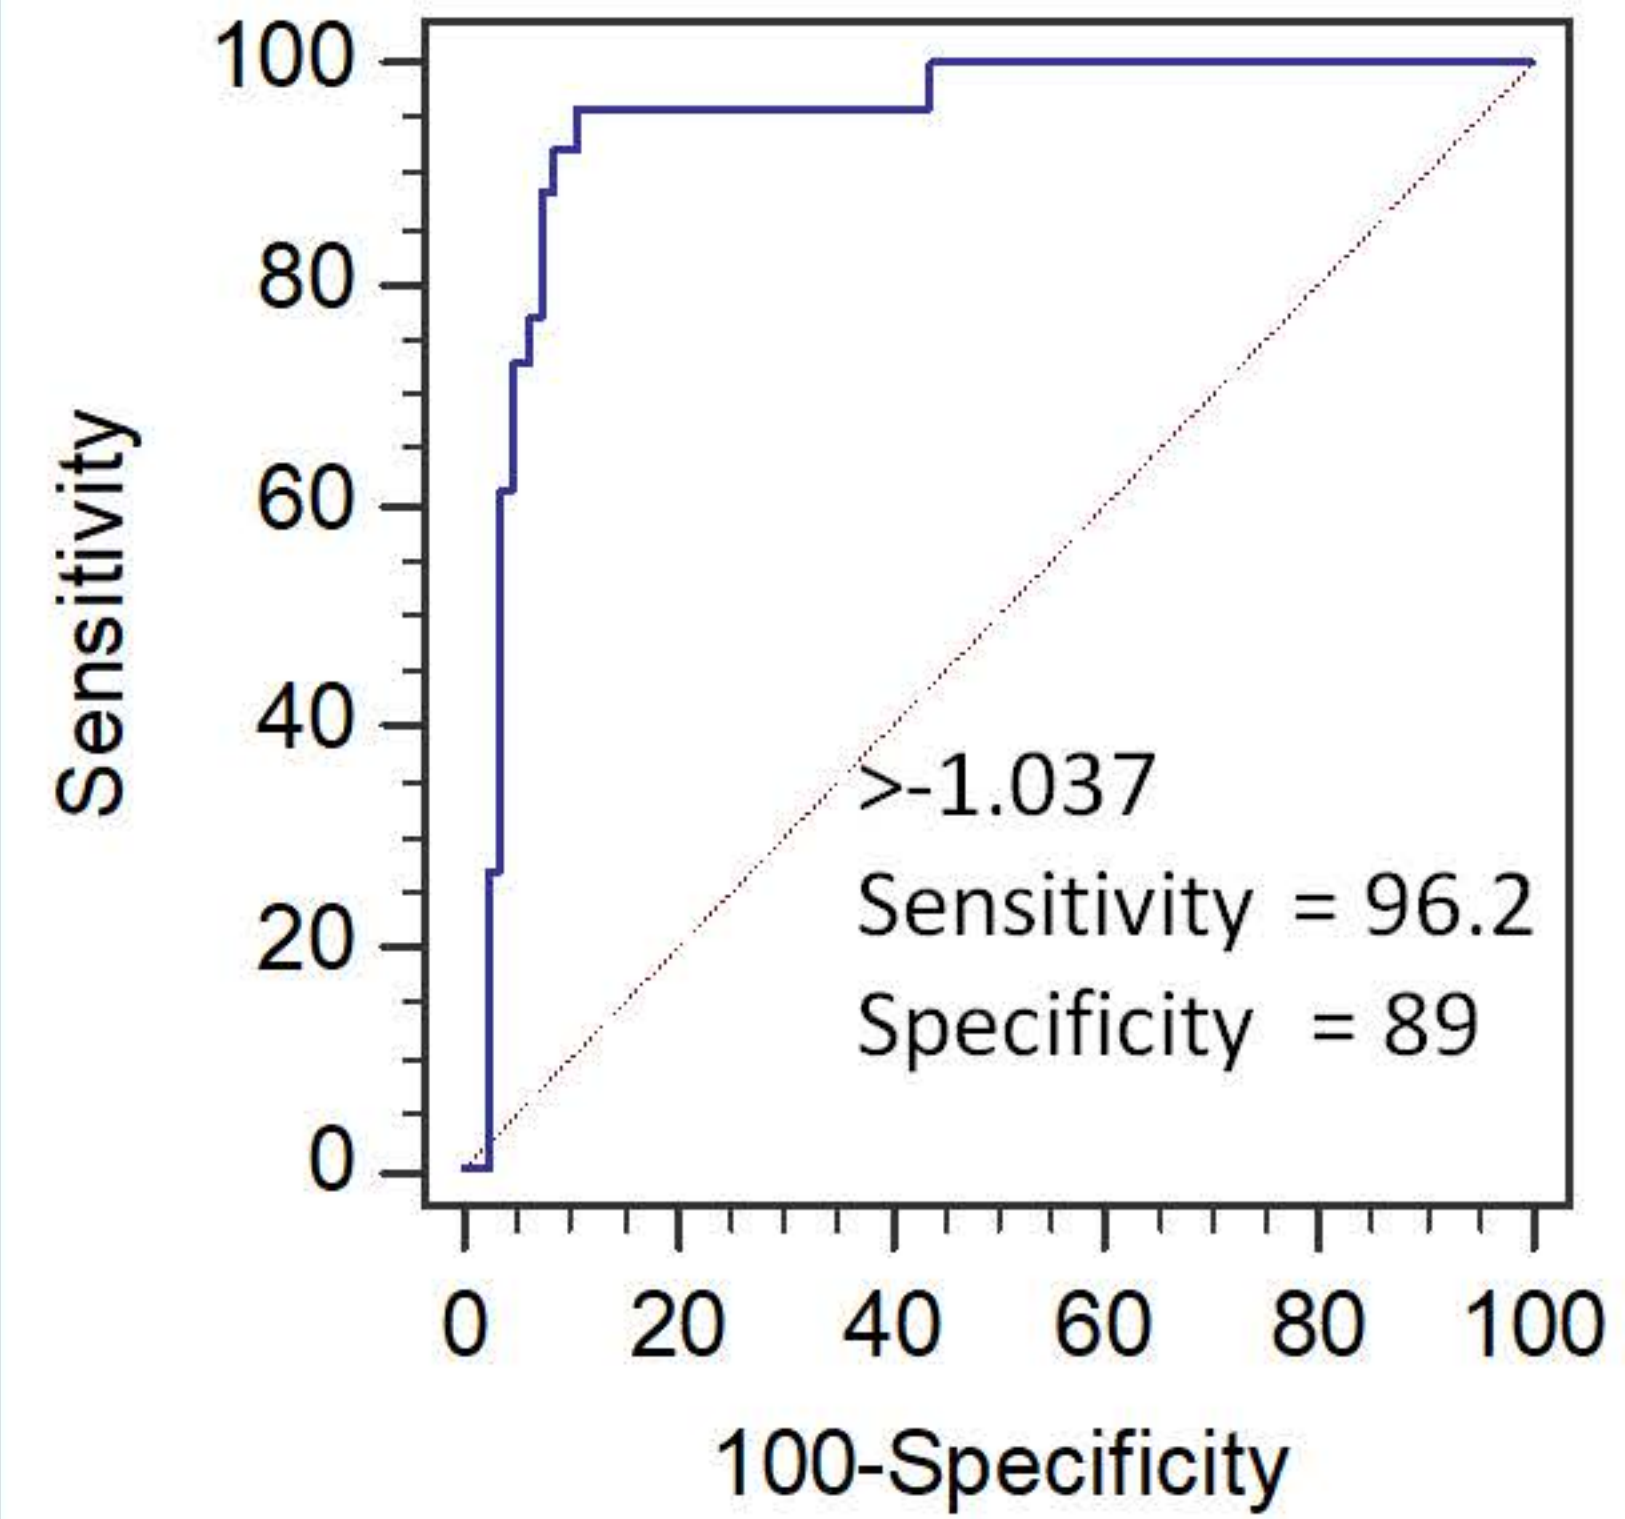

VGG19

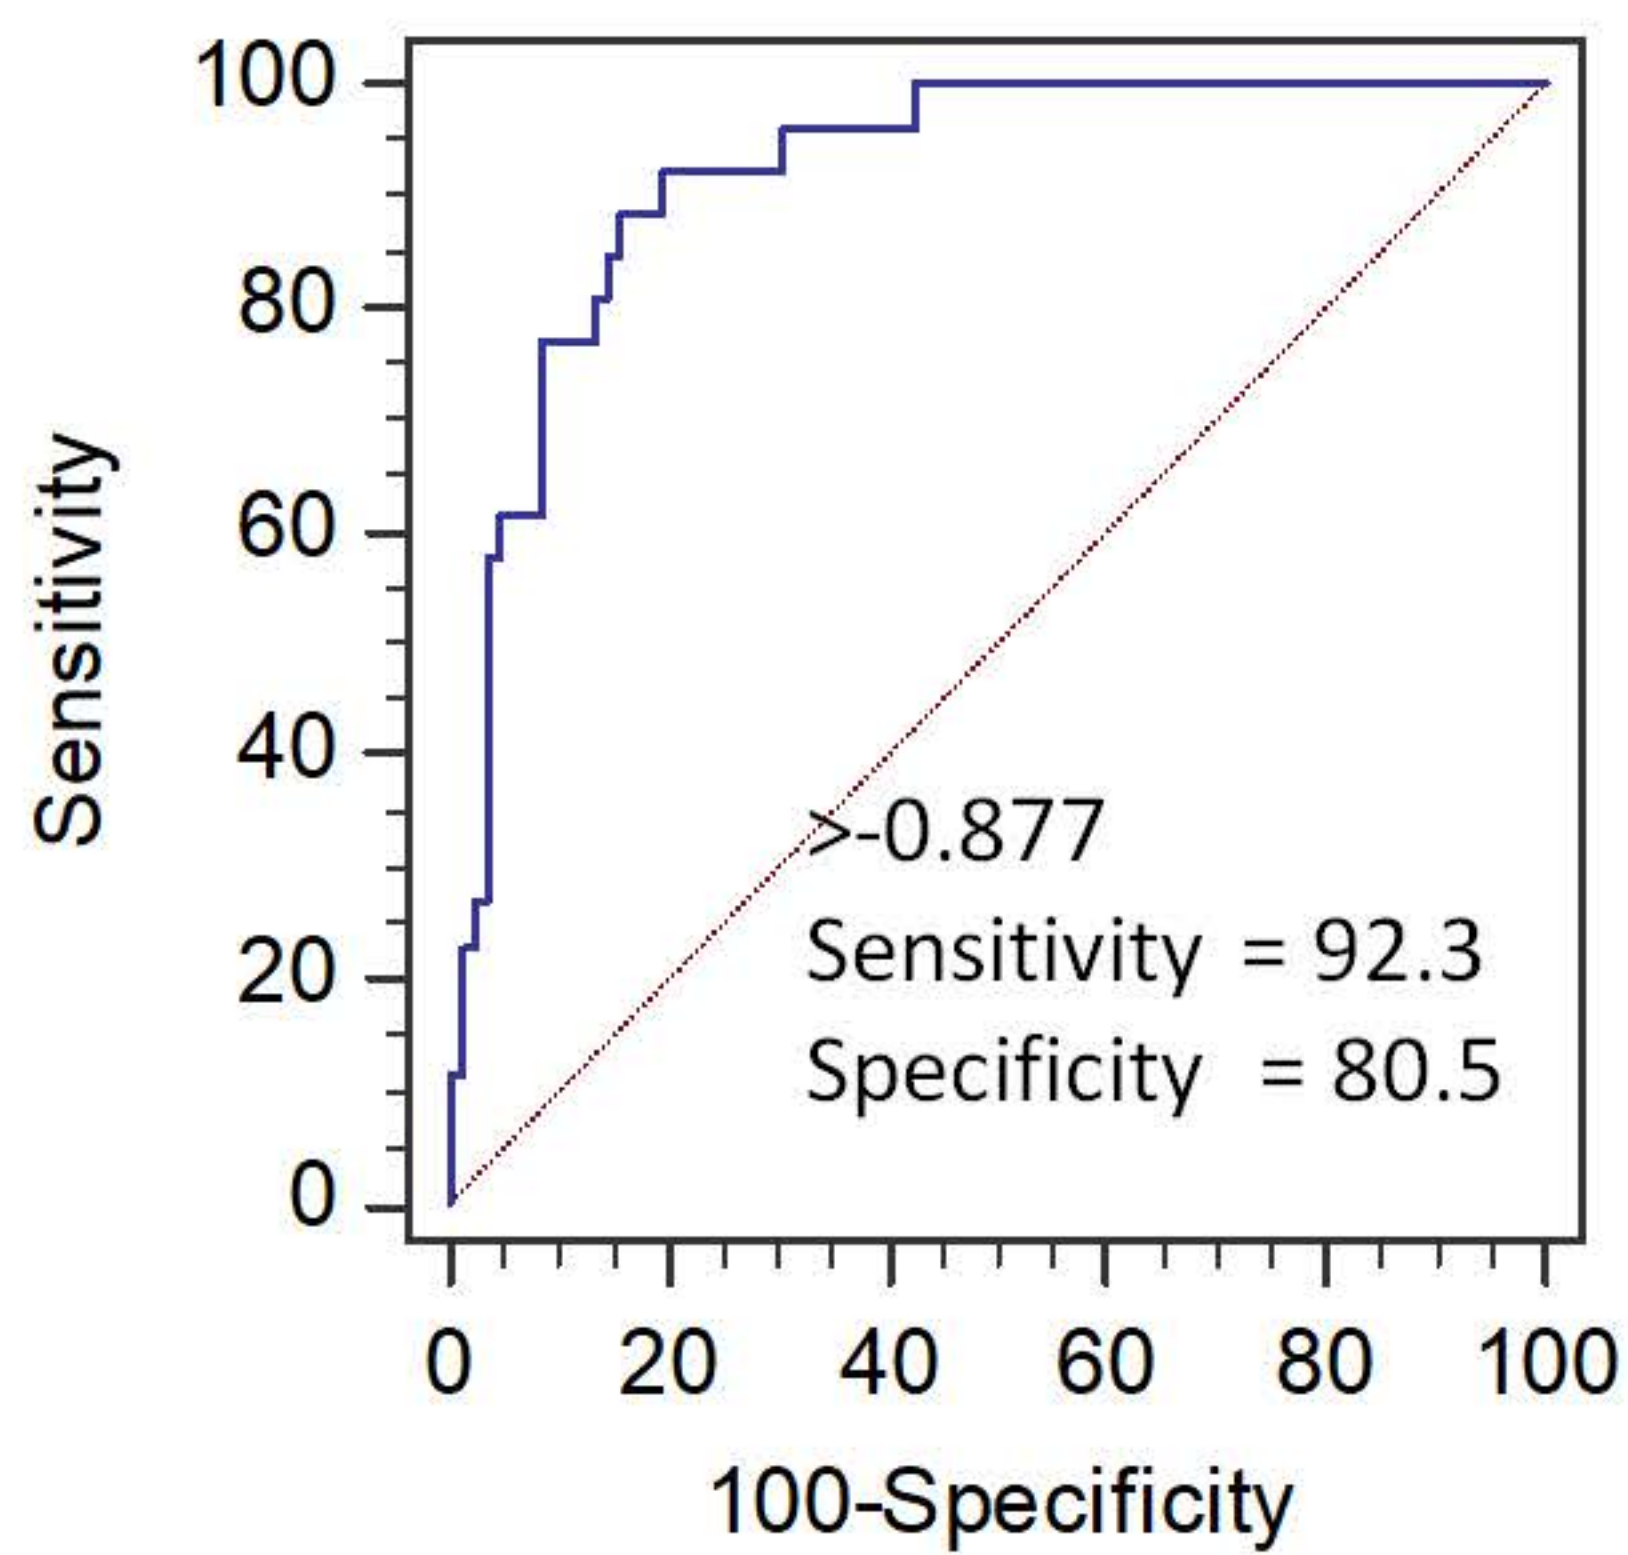

Xception

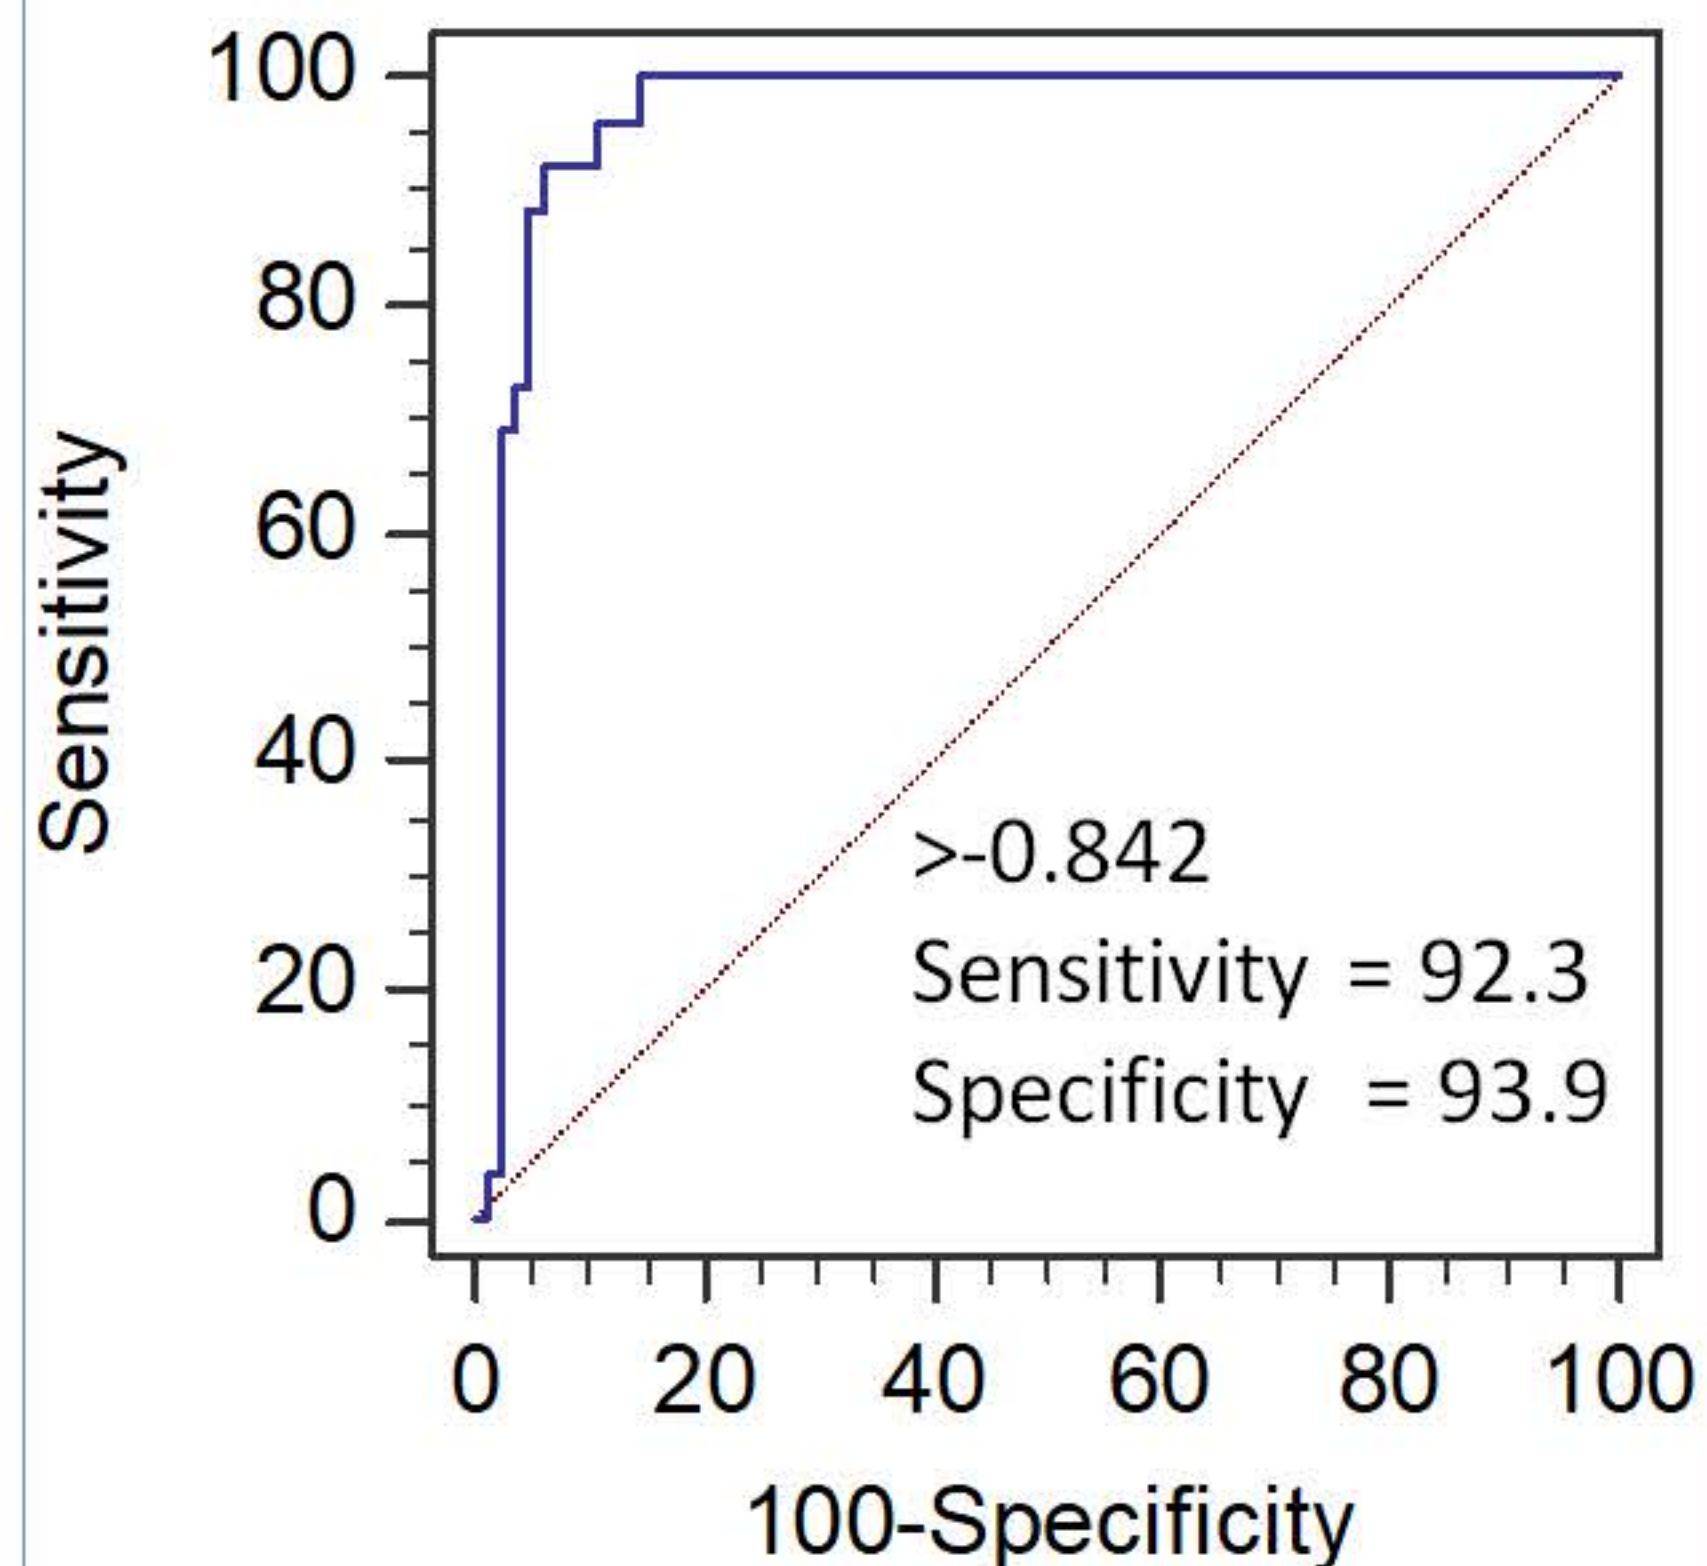

Supplement: s1 [file s1]
