# Supplementary figures and images for: Validation of a Point-of-Care Optical Coherence Tomography Device with Machine Learning Algorithm for Detection of Oral Potentially Malignant and Malignant Lesions
Source: MDPI journal article supplement (doi:10.3390/cancers13143583), 2021-07-17

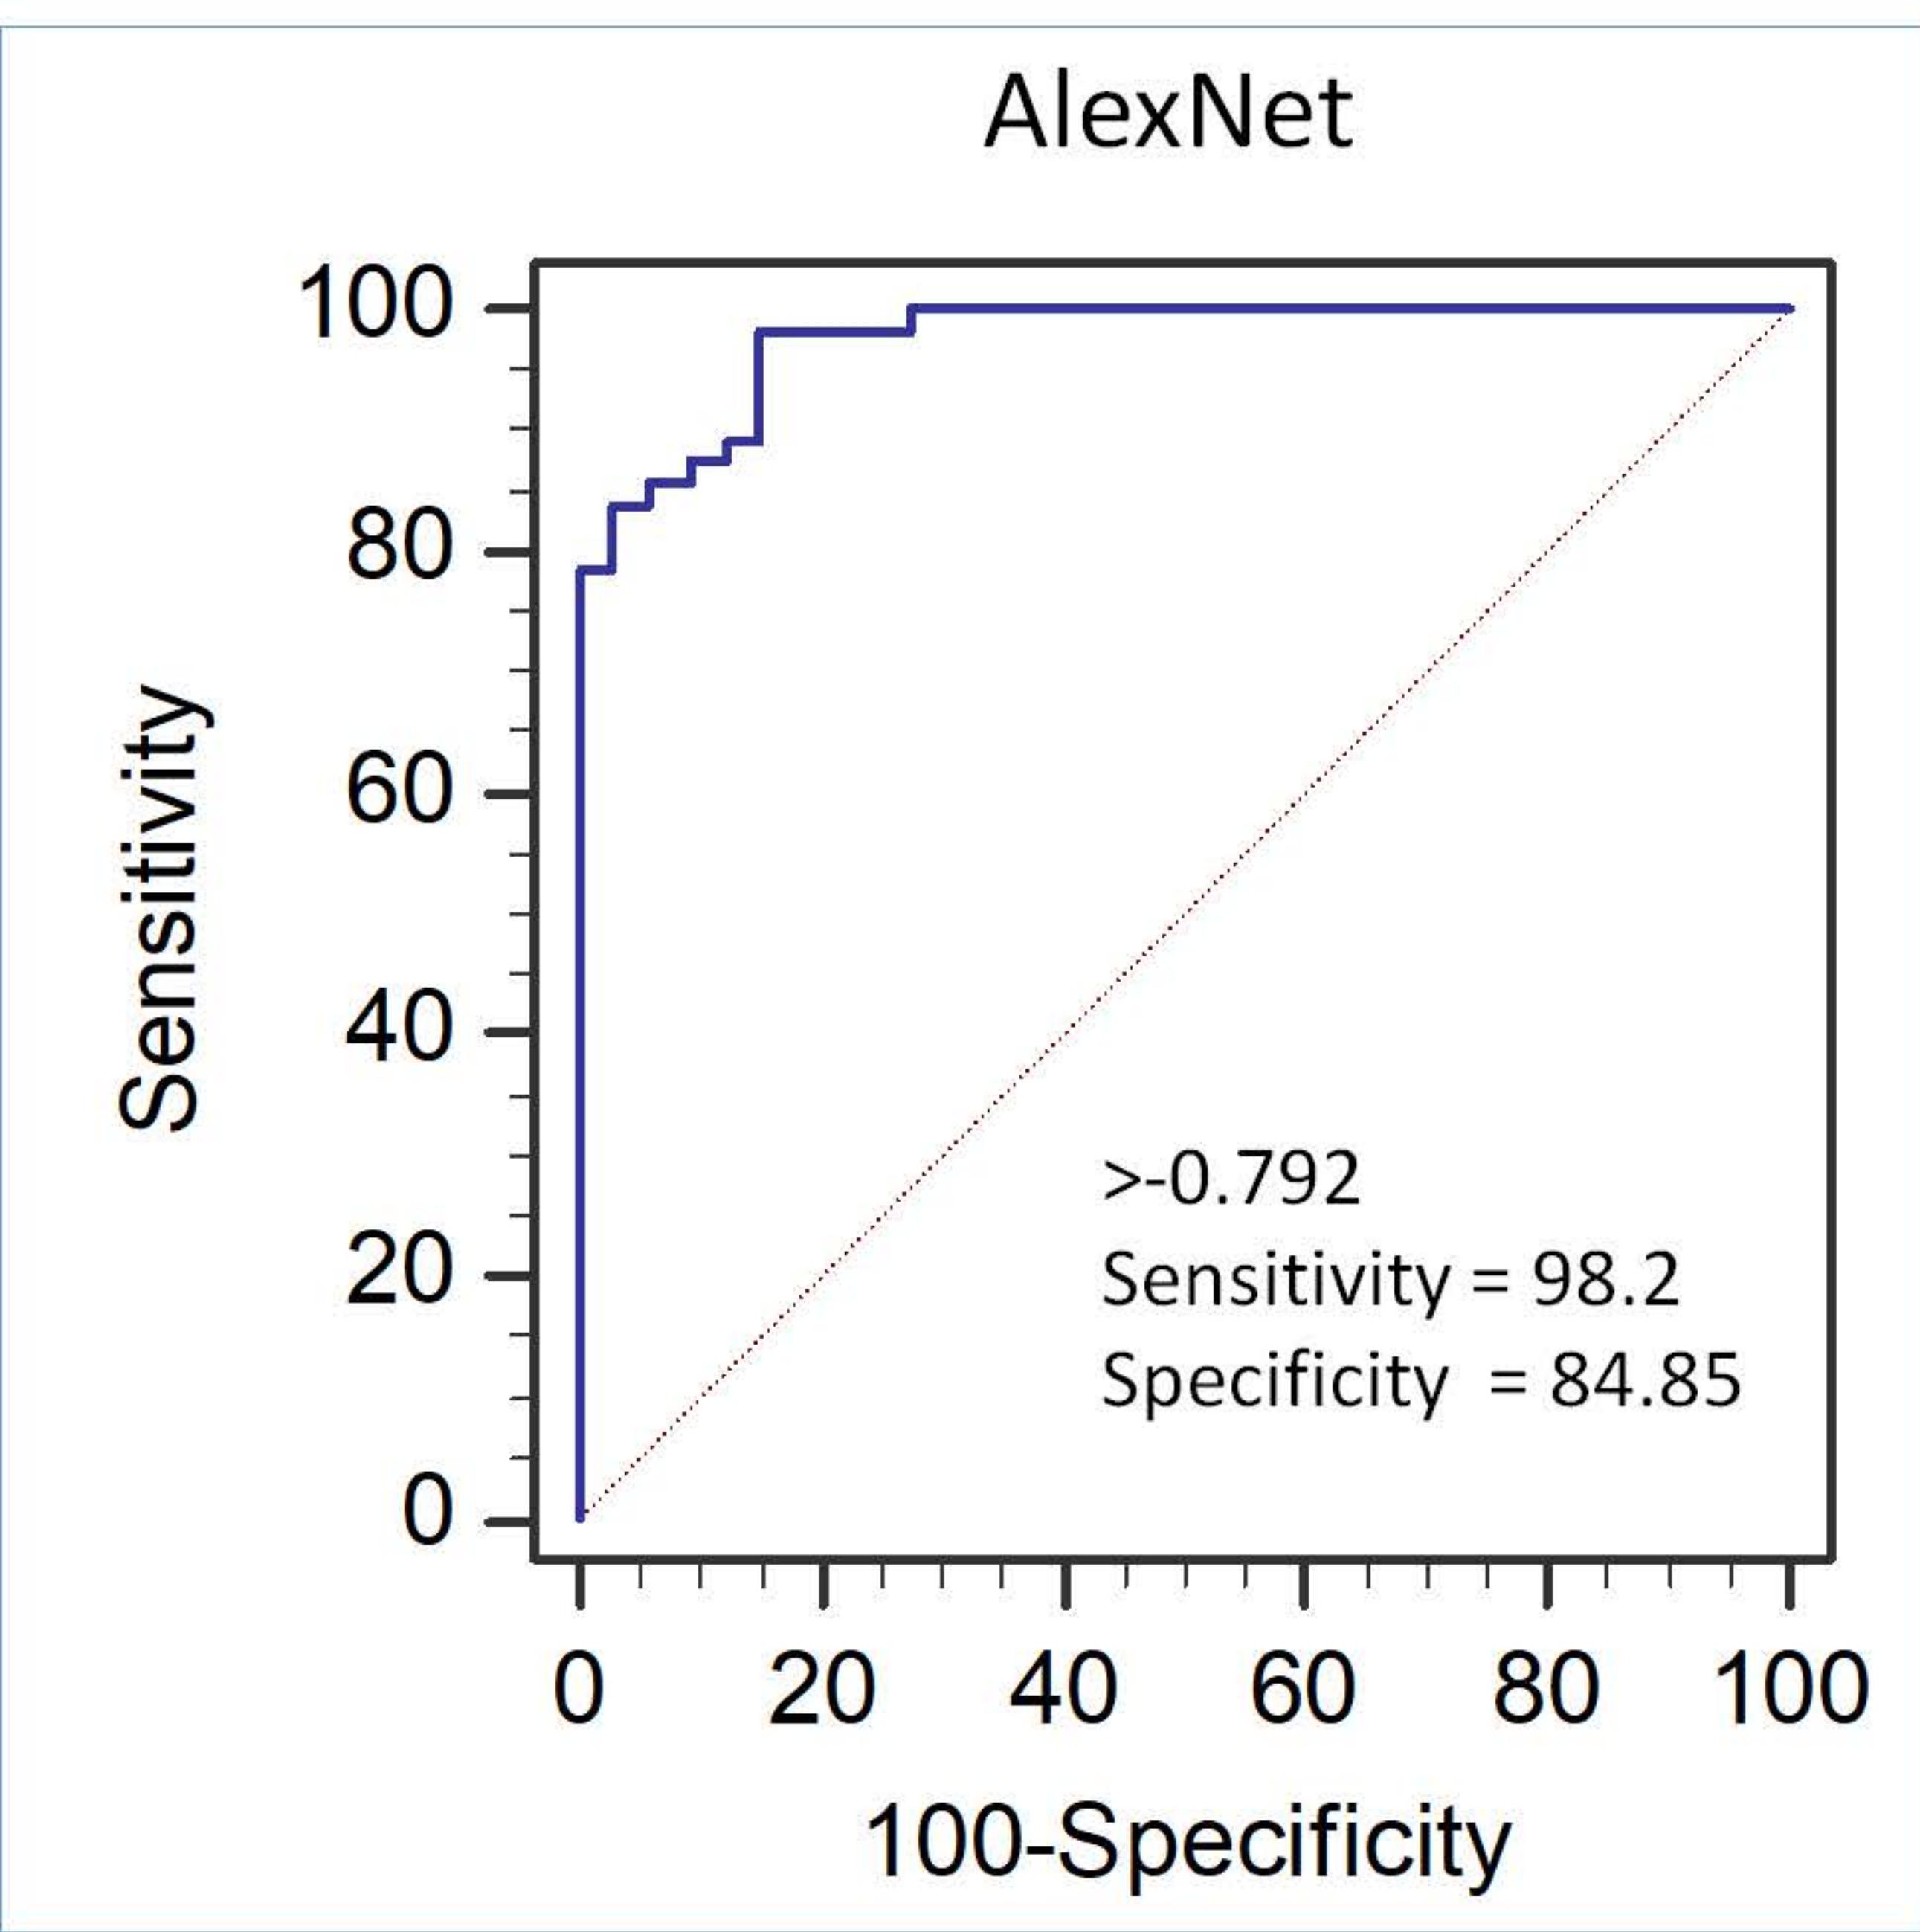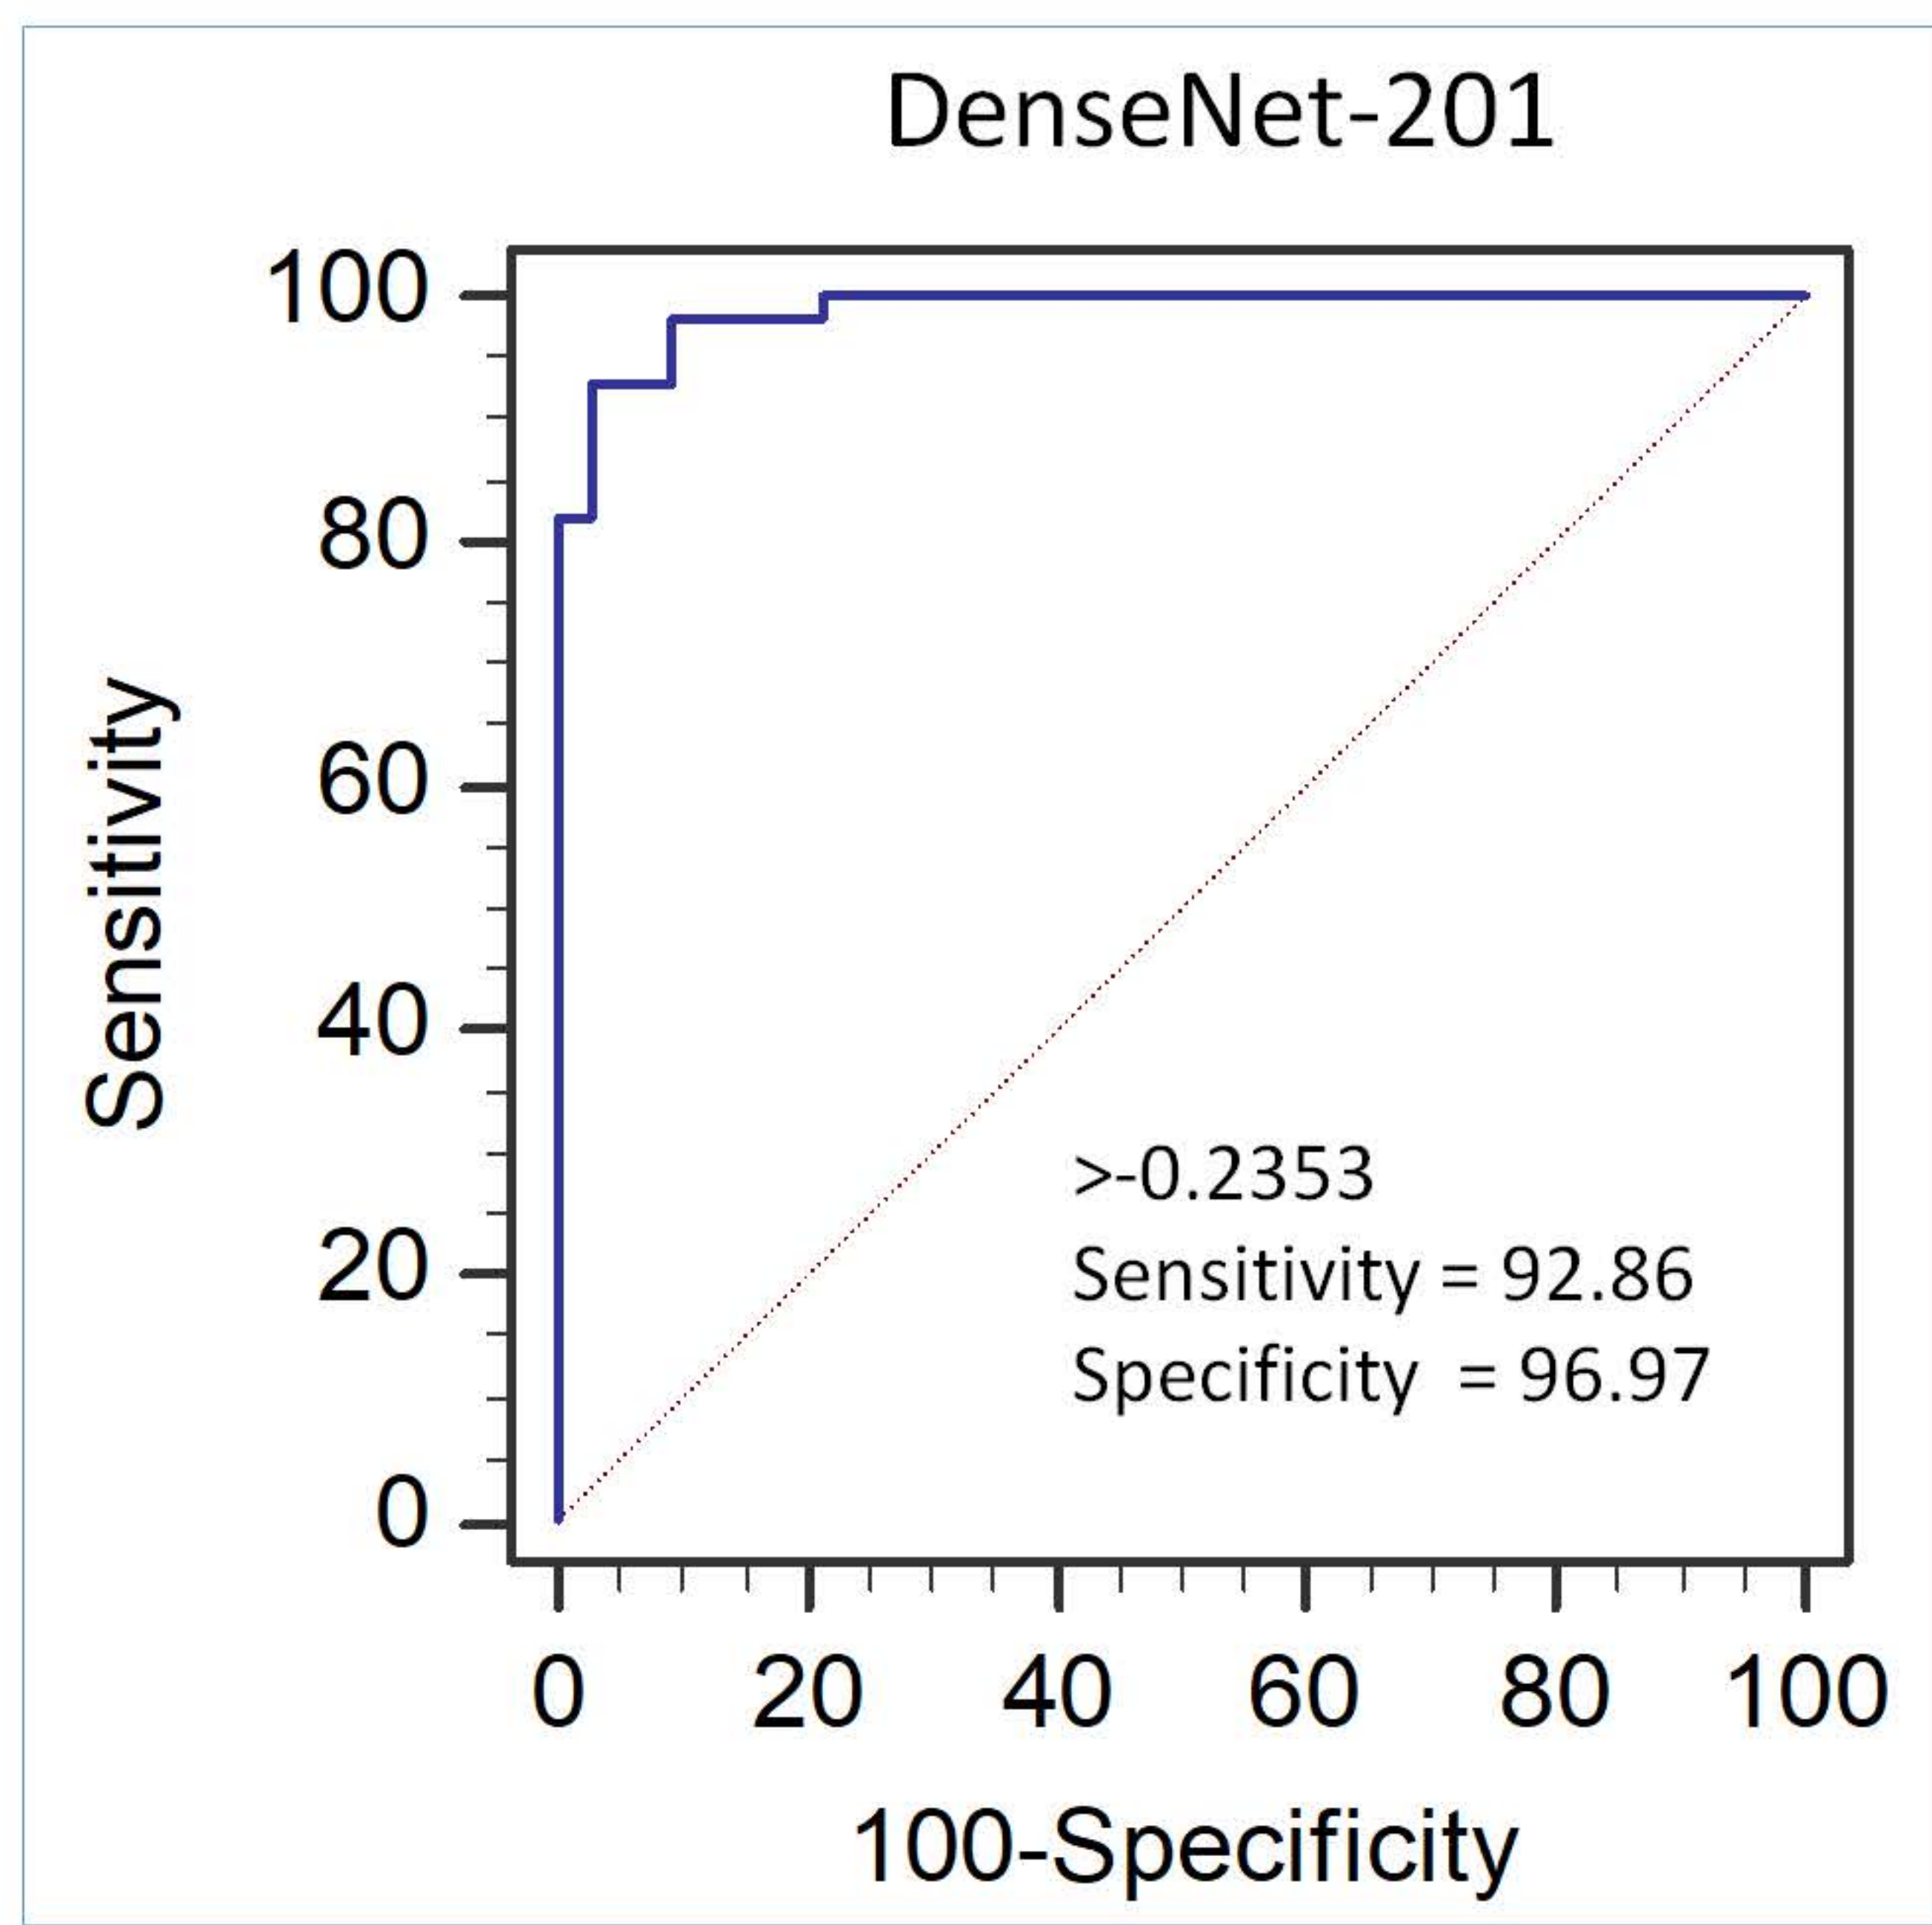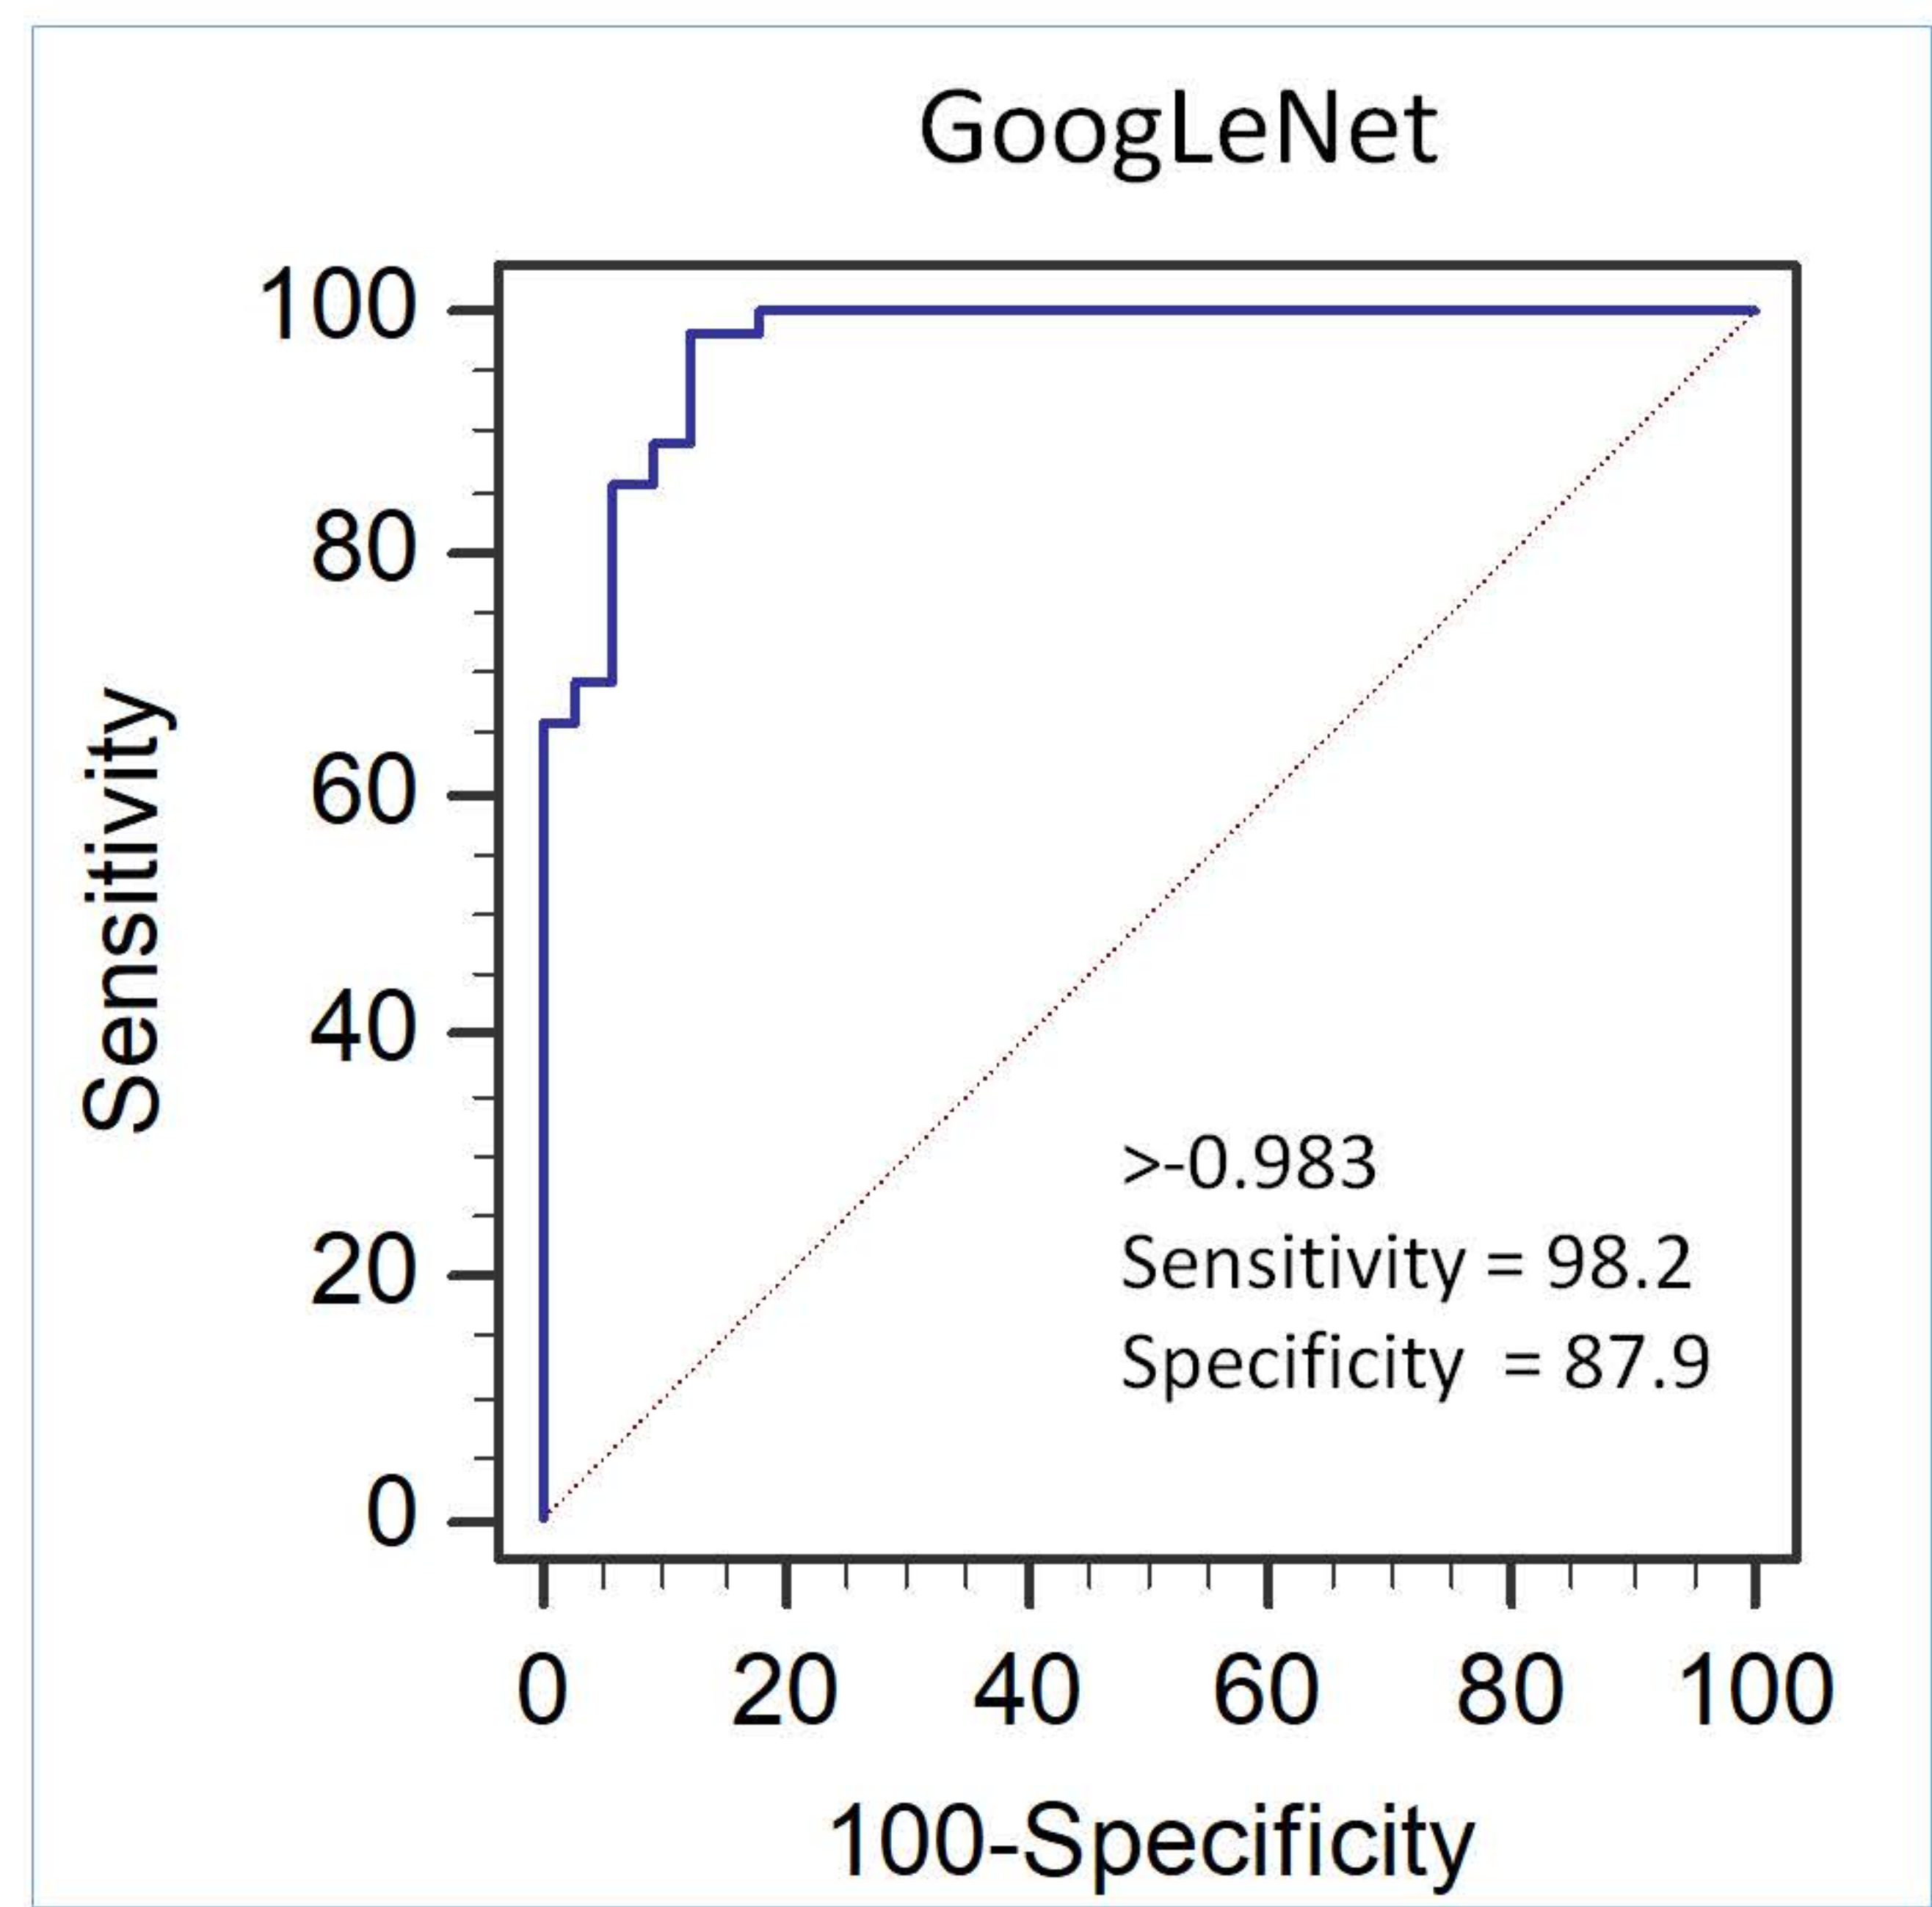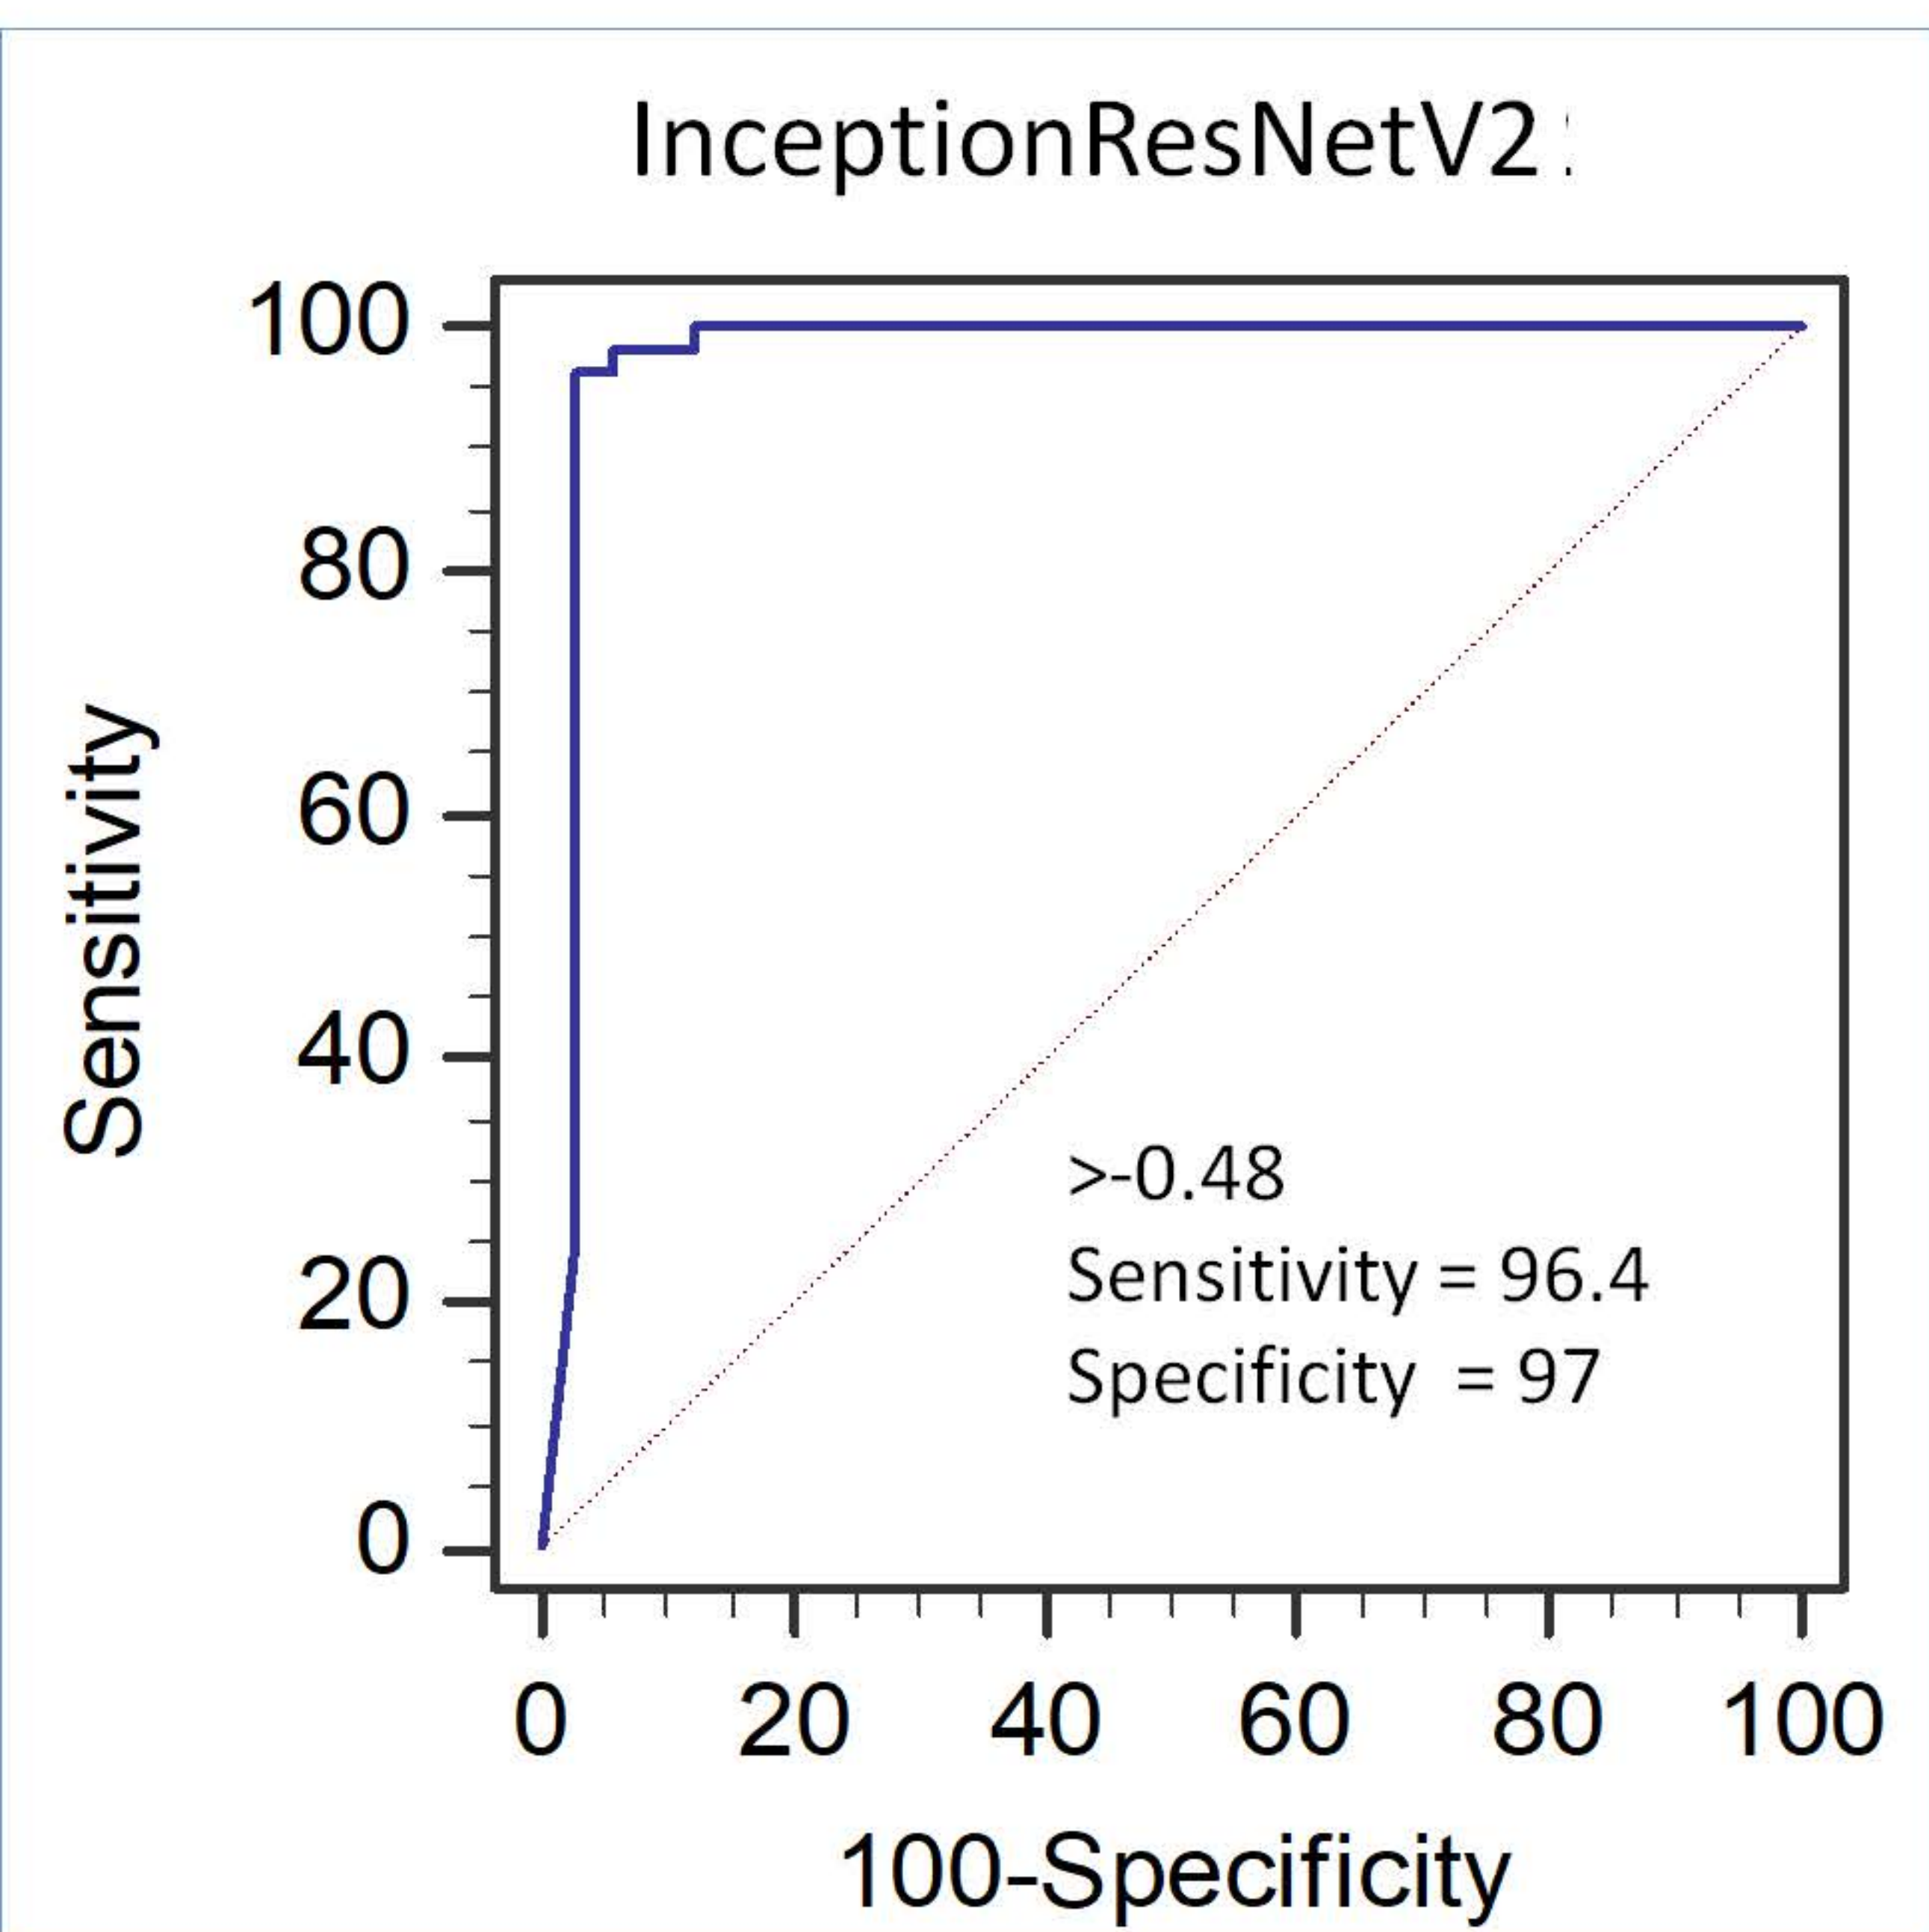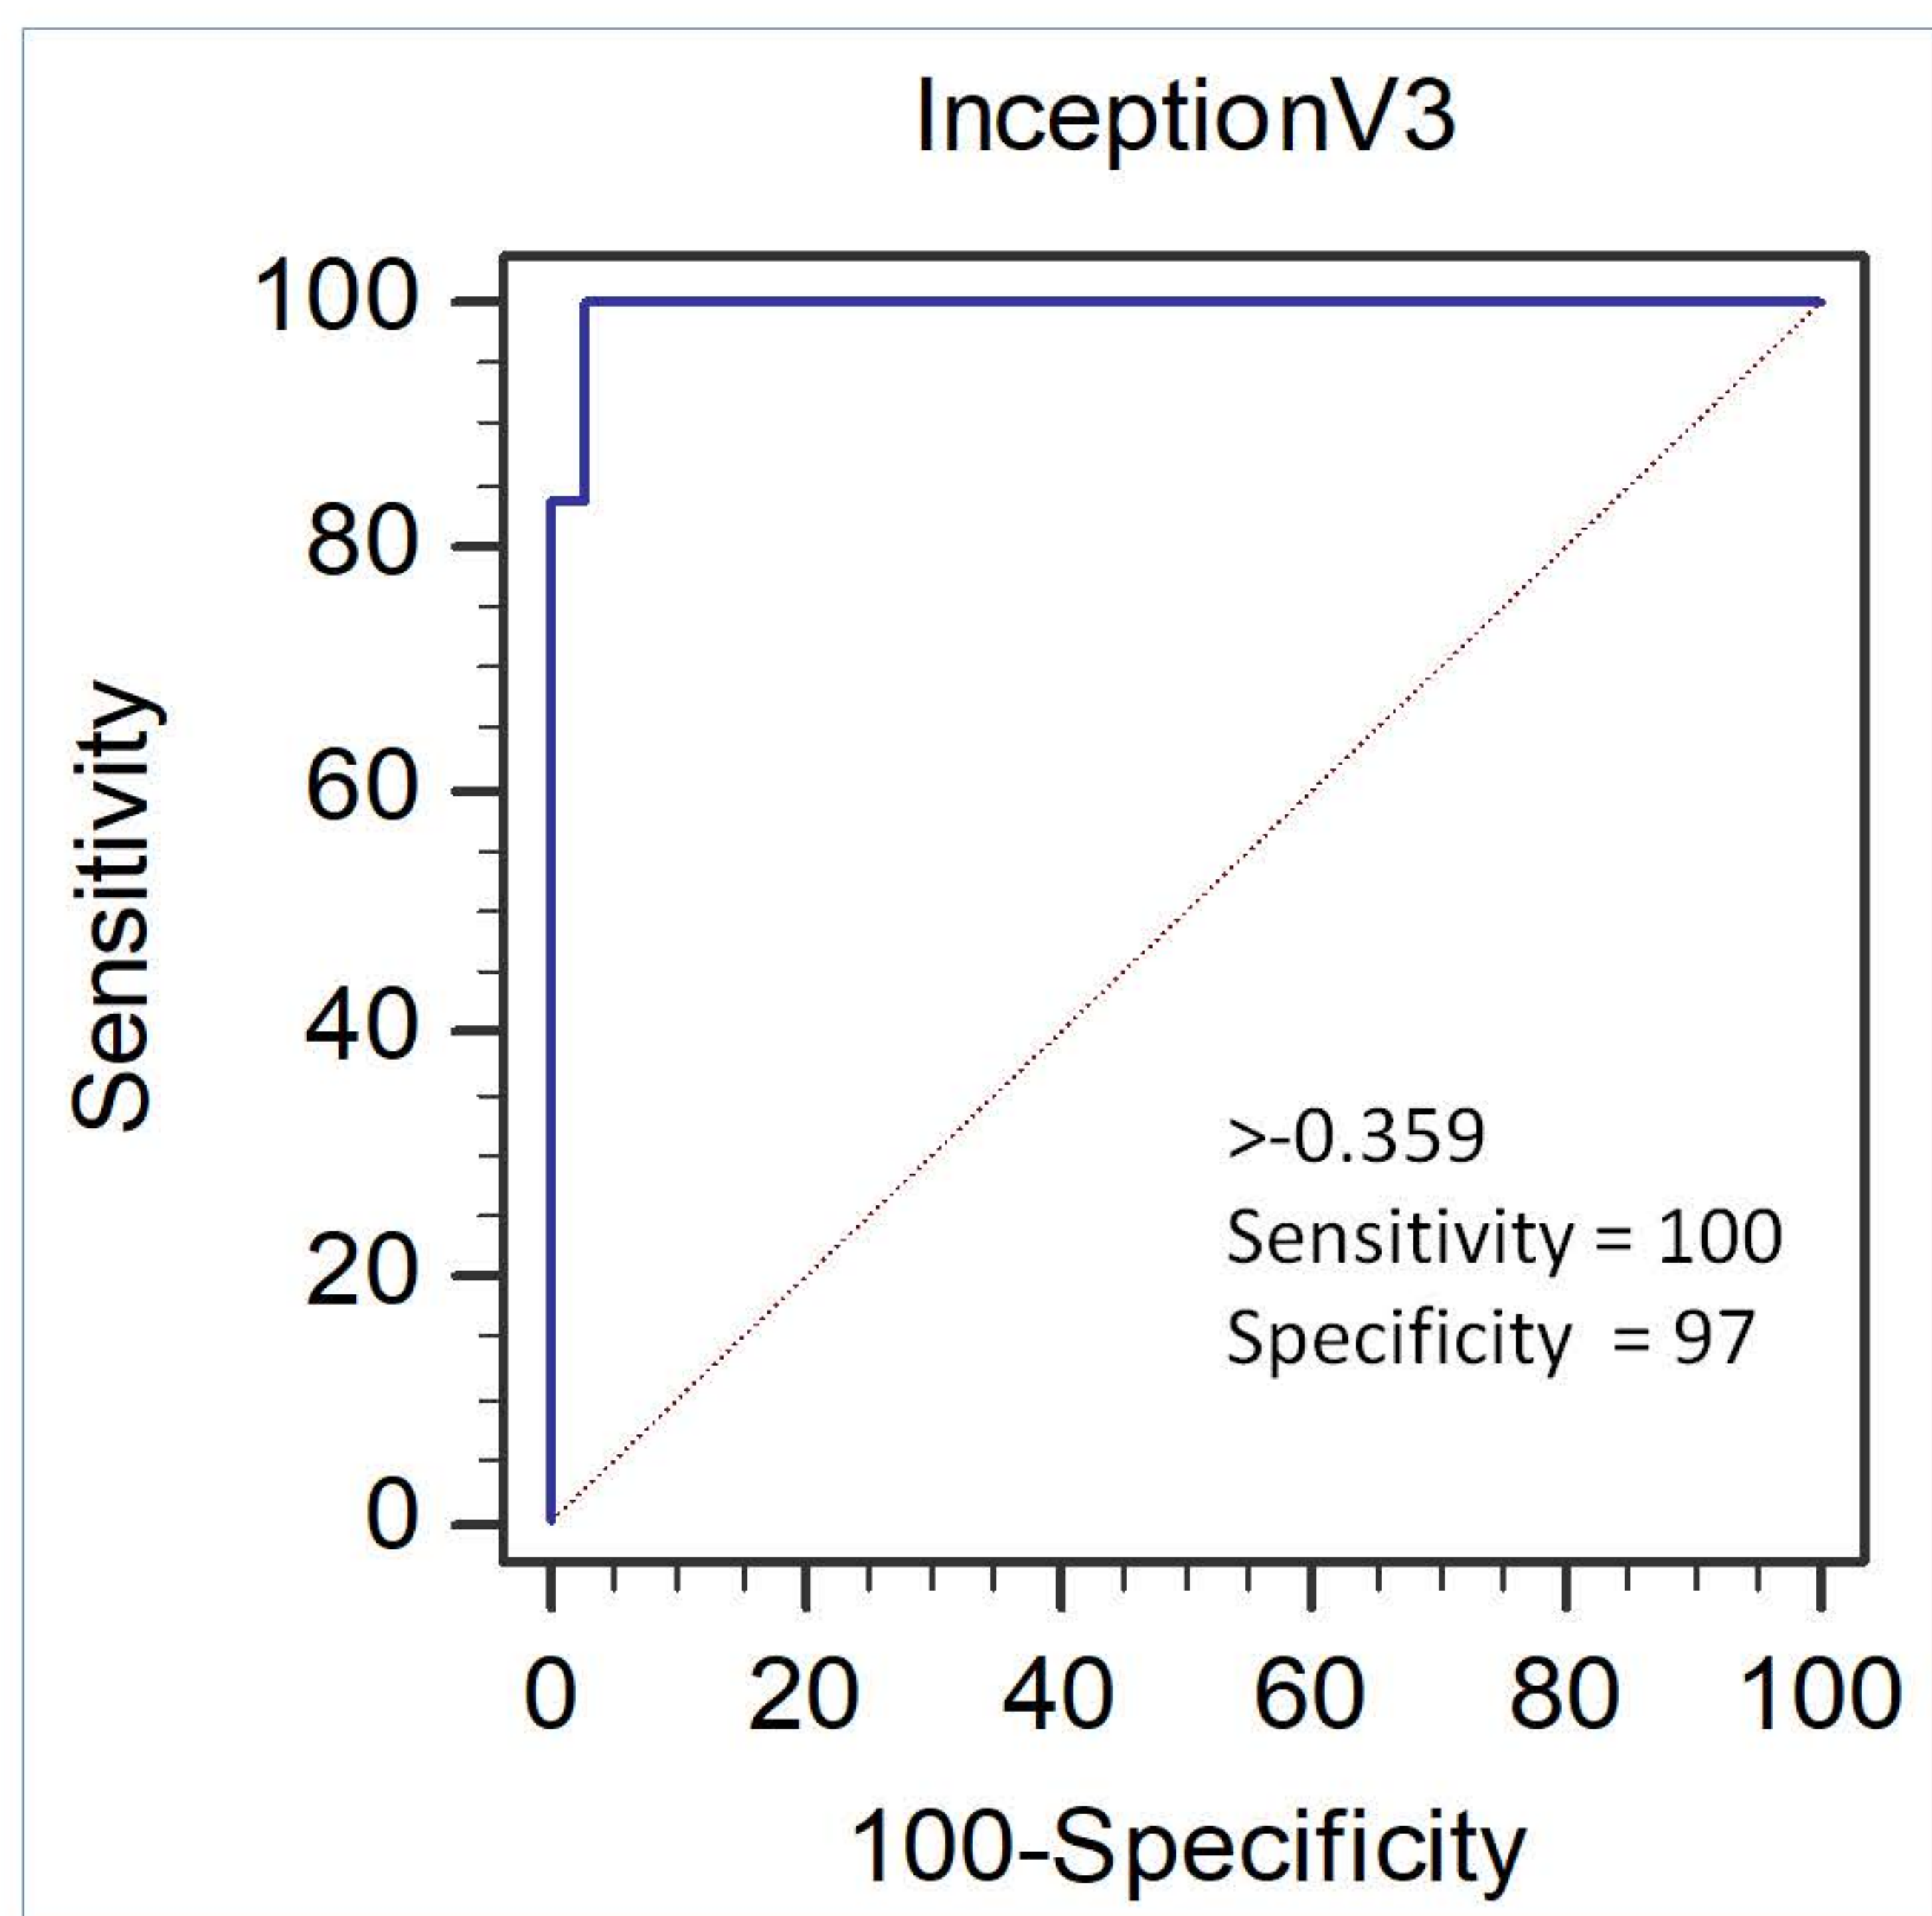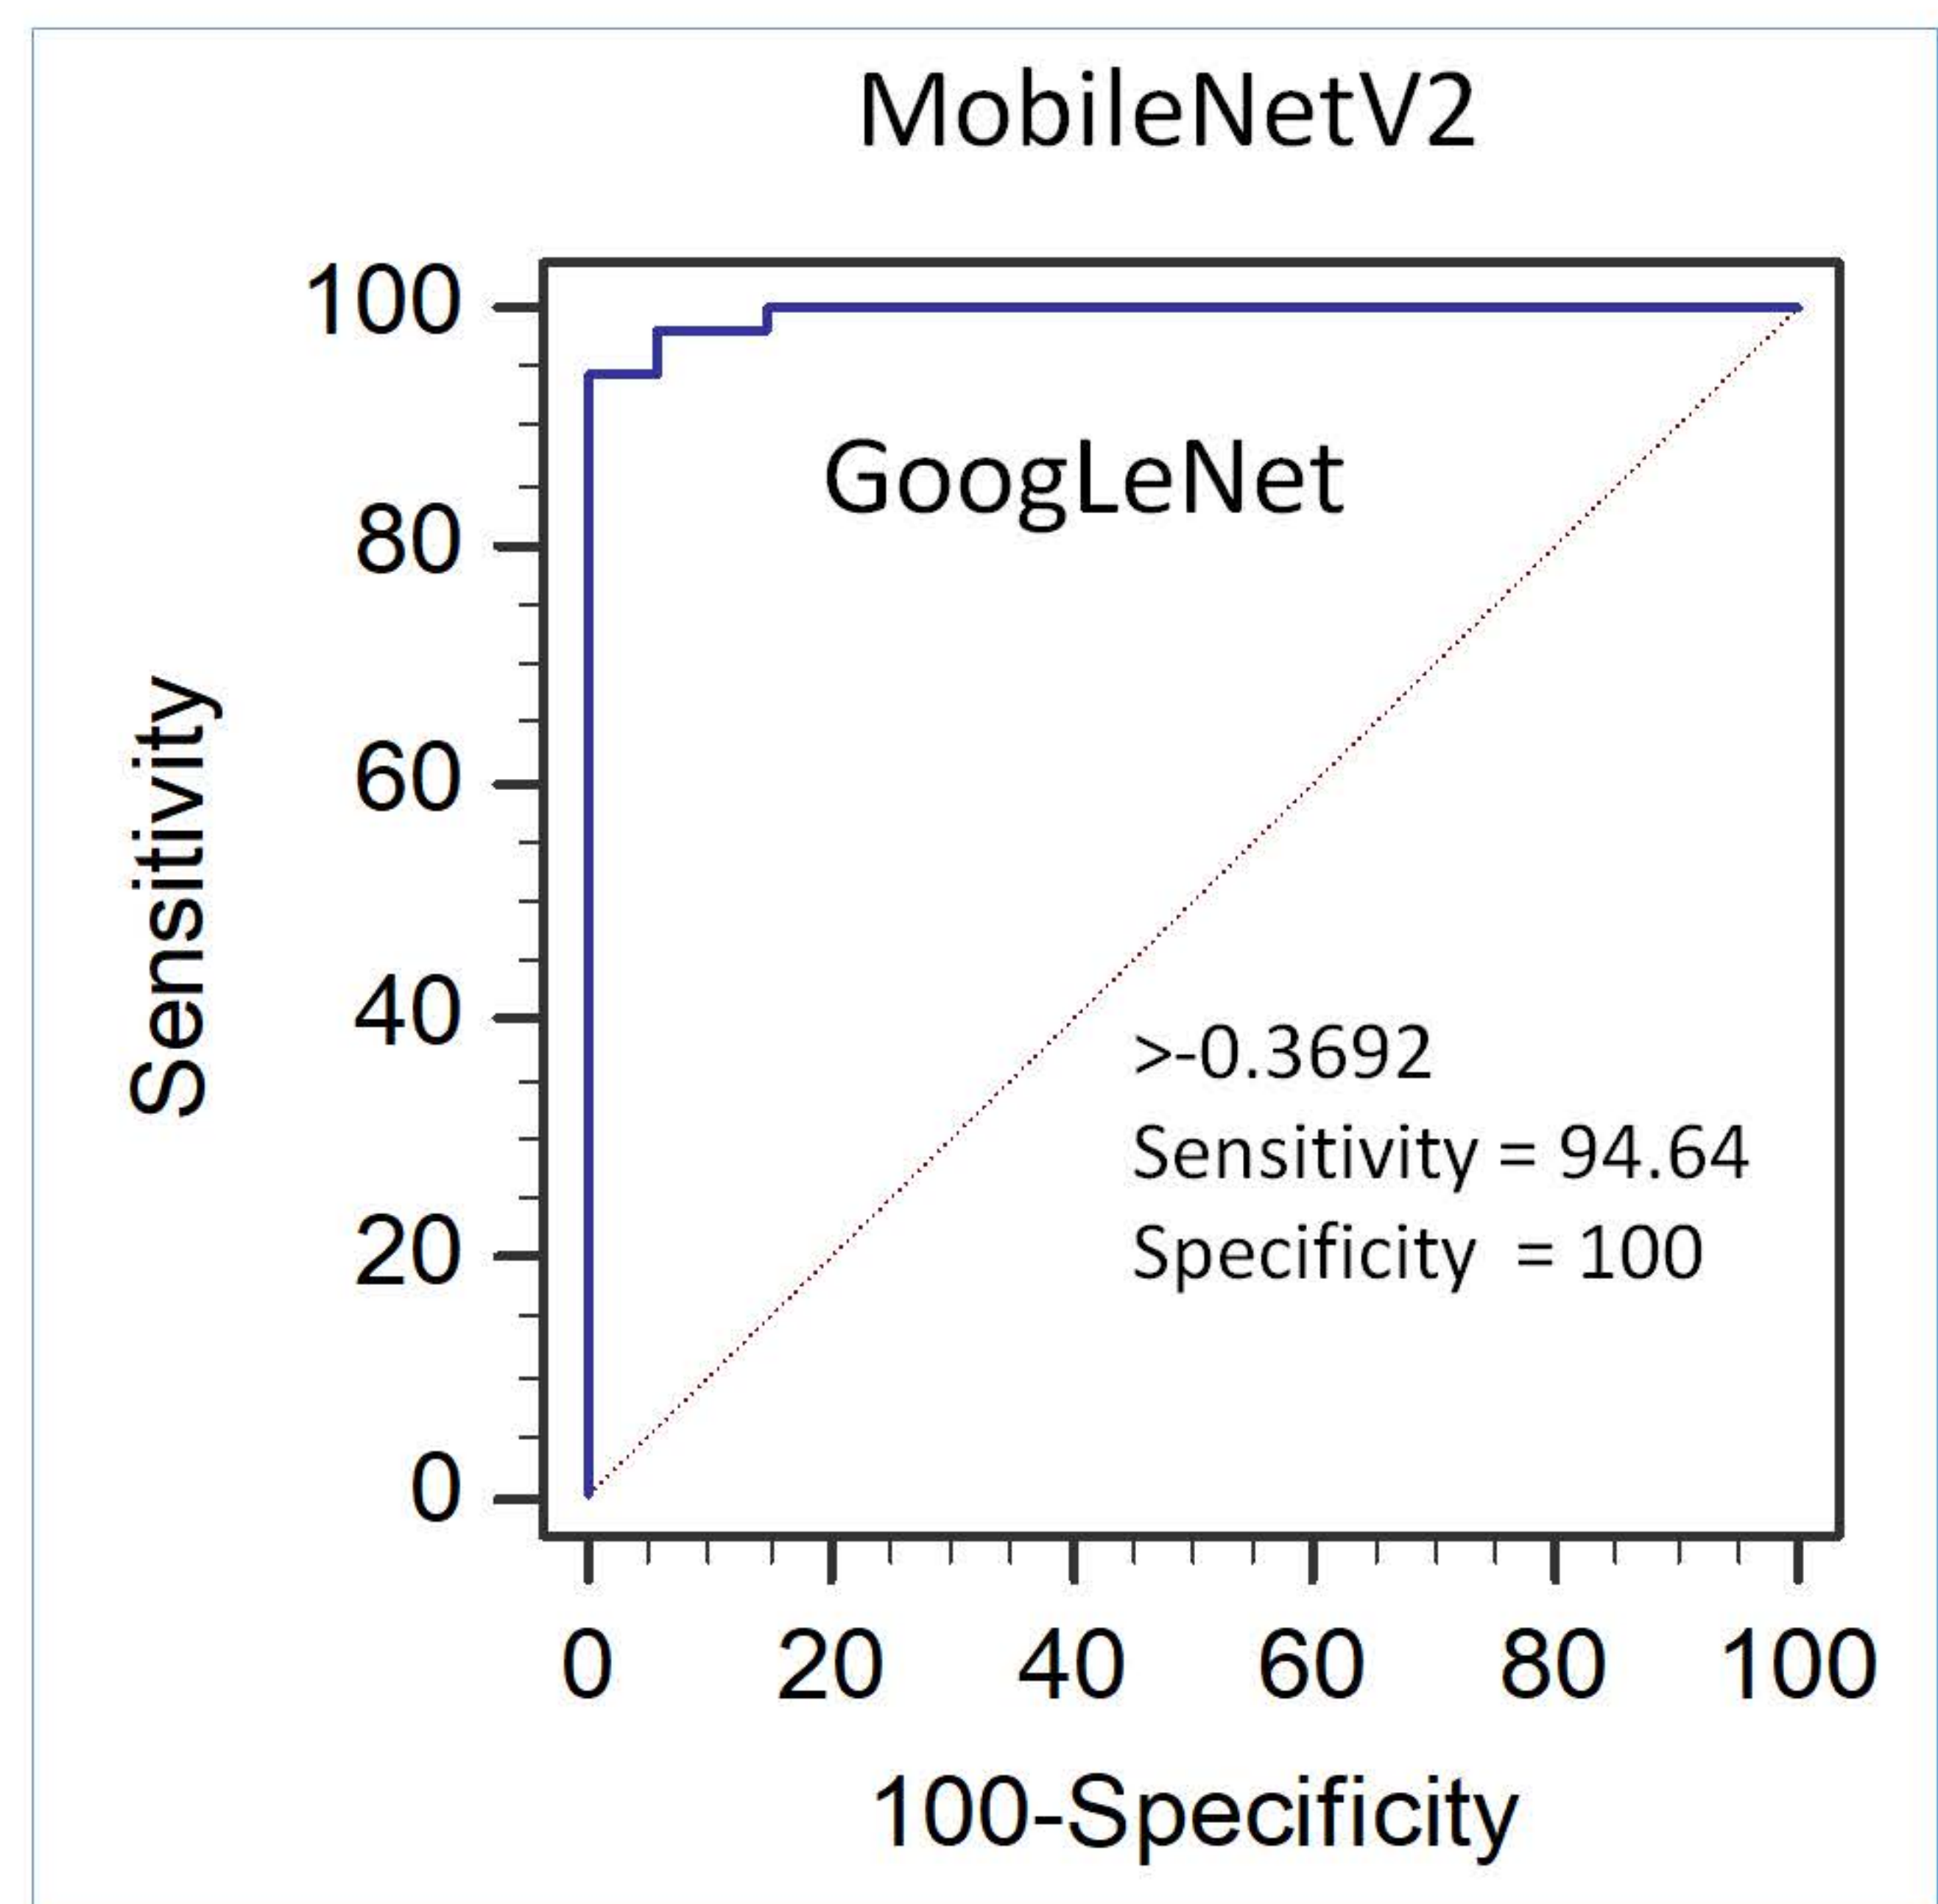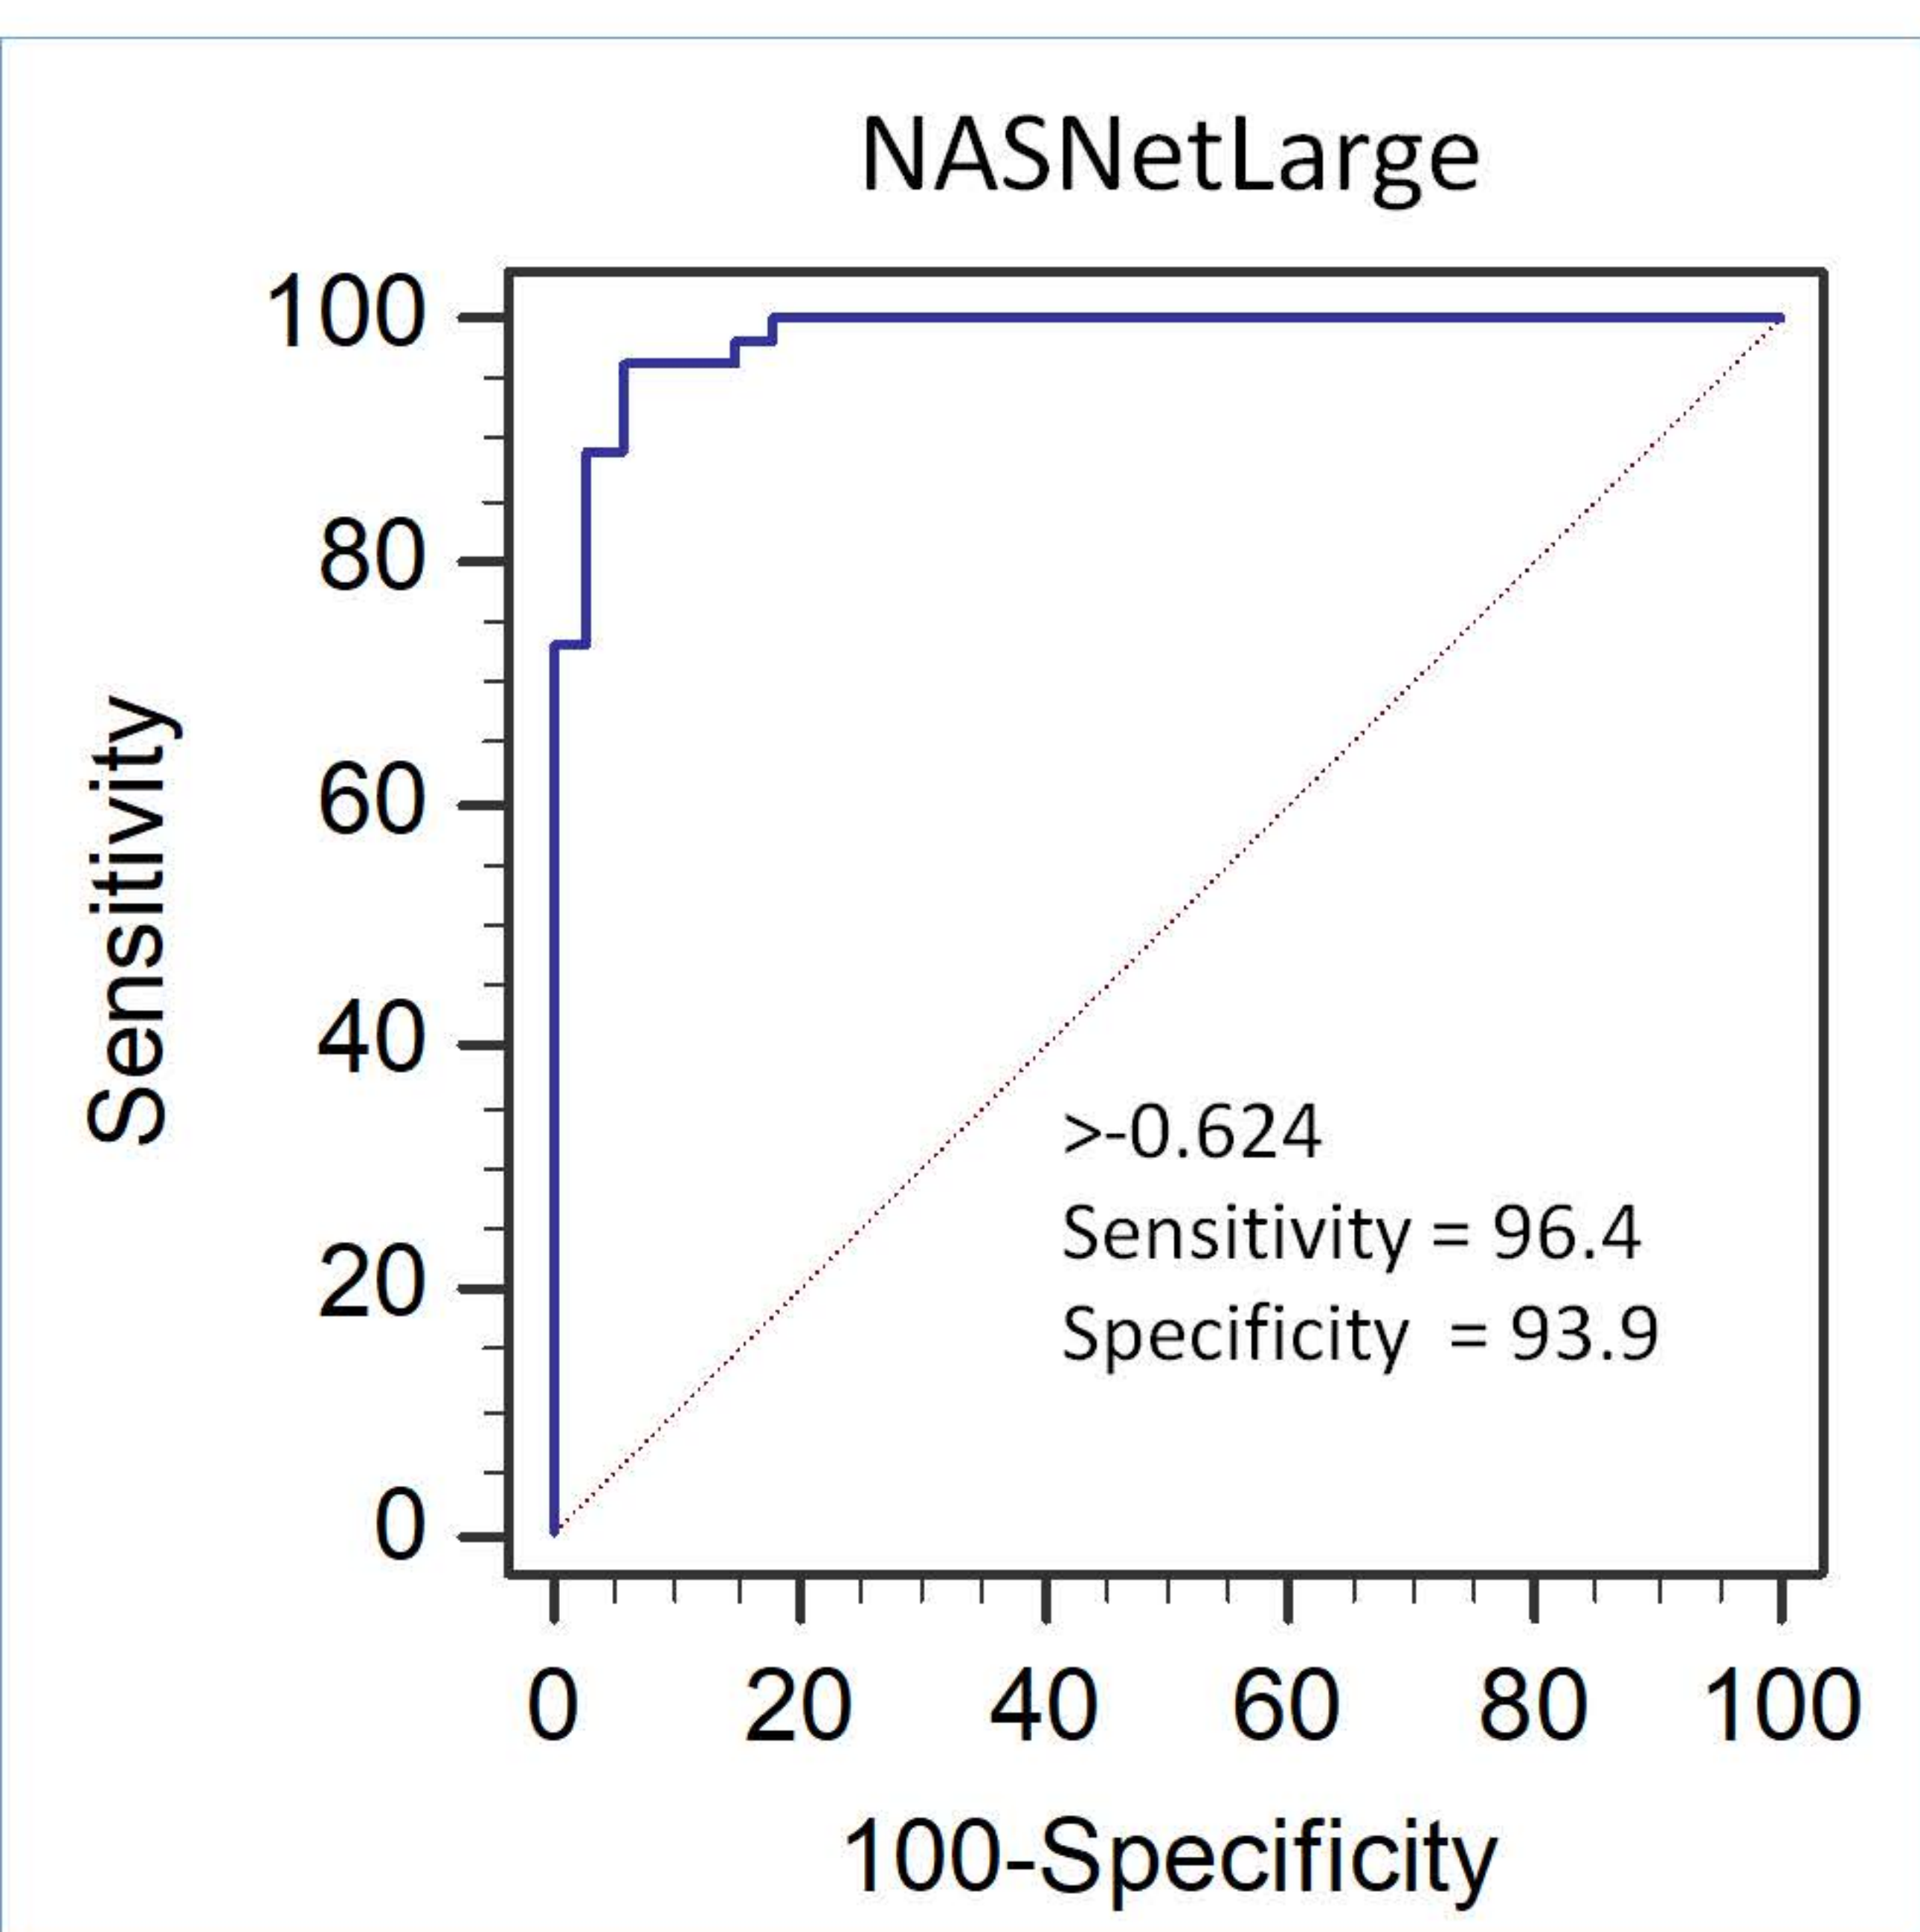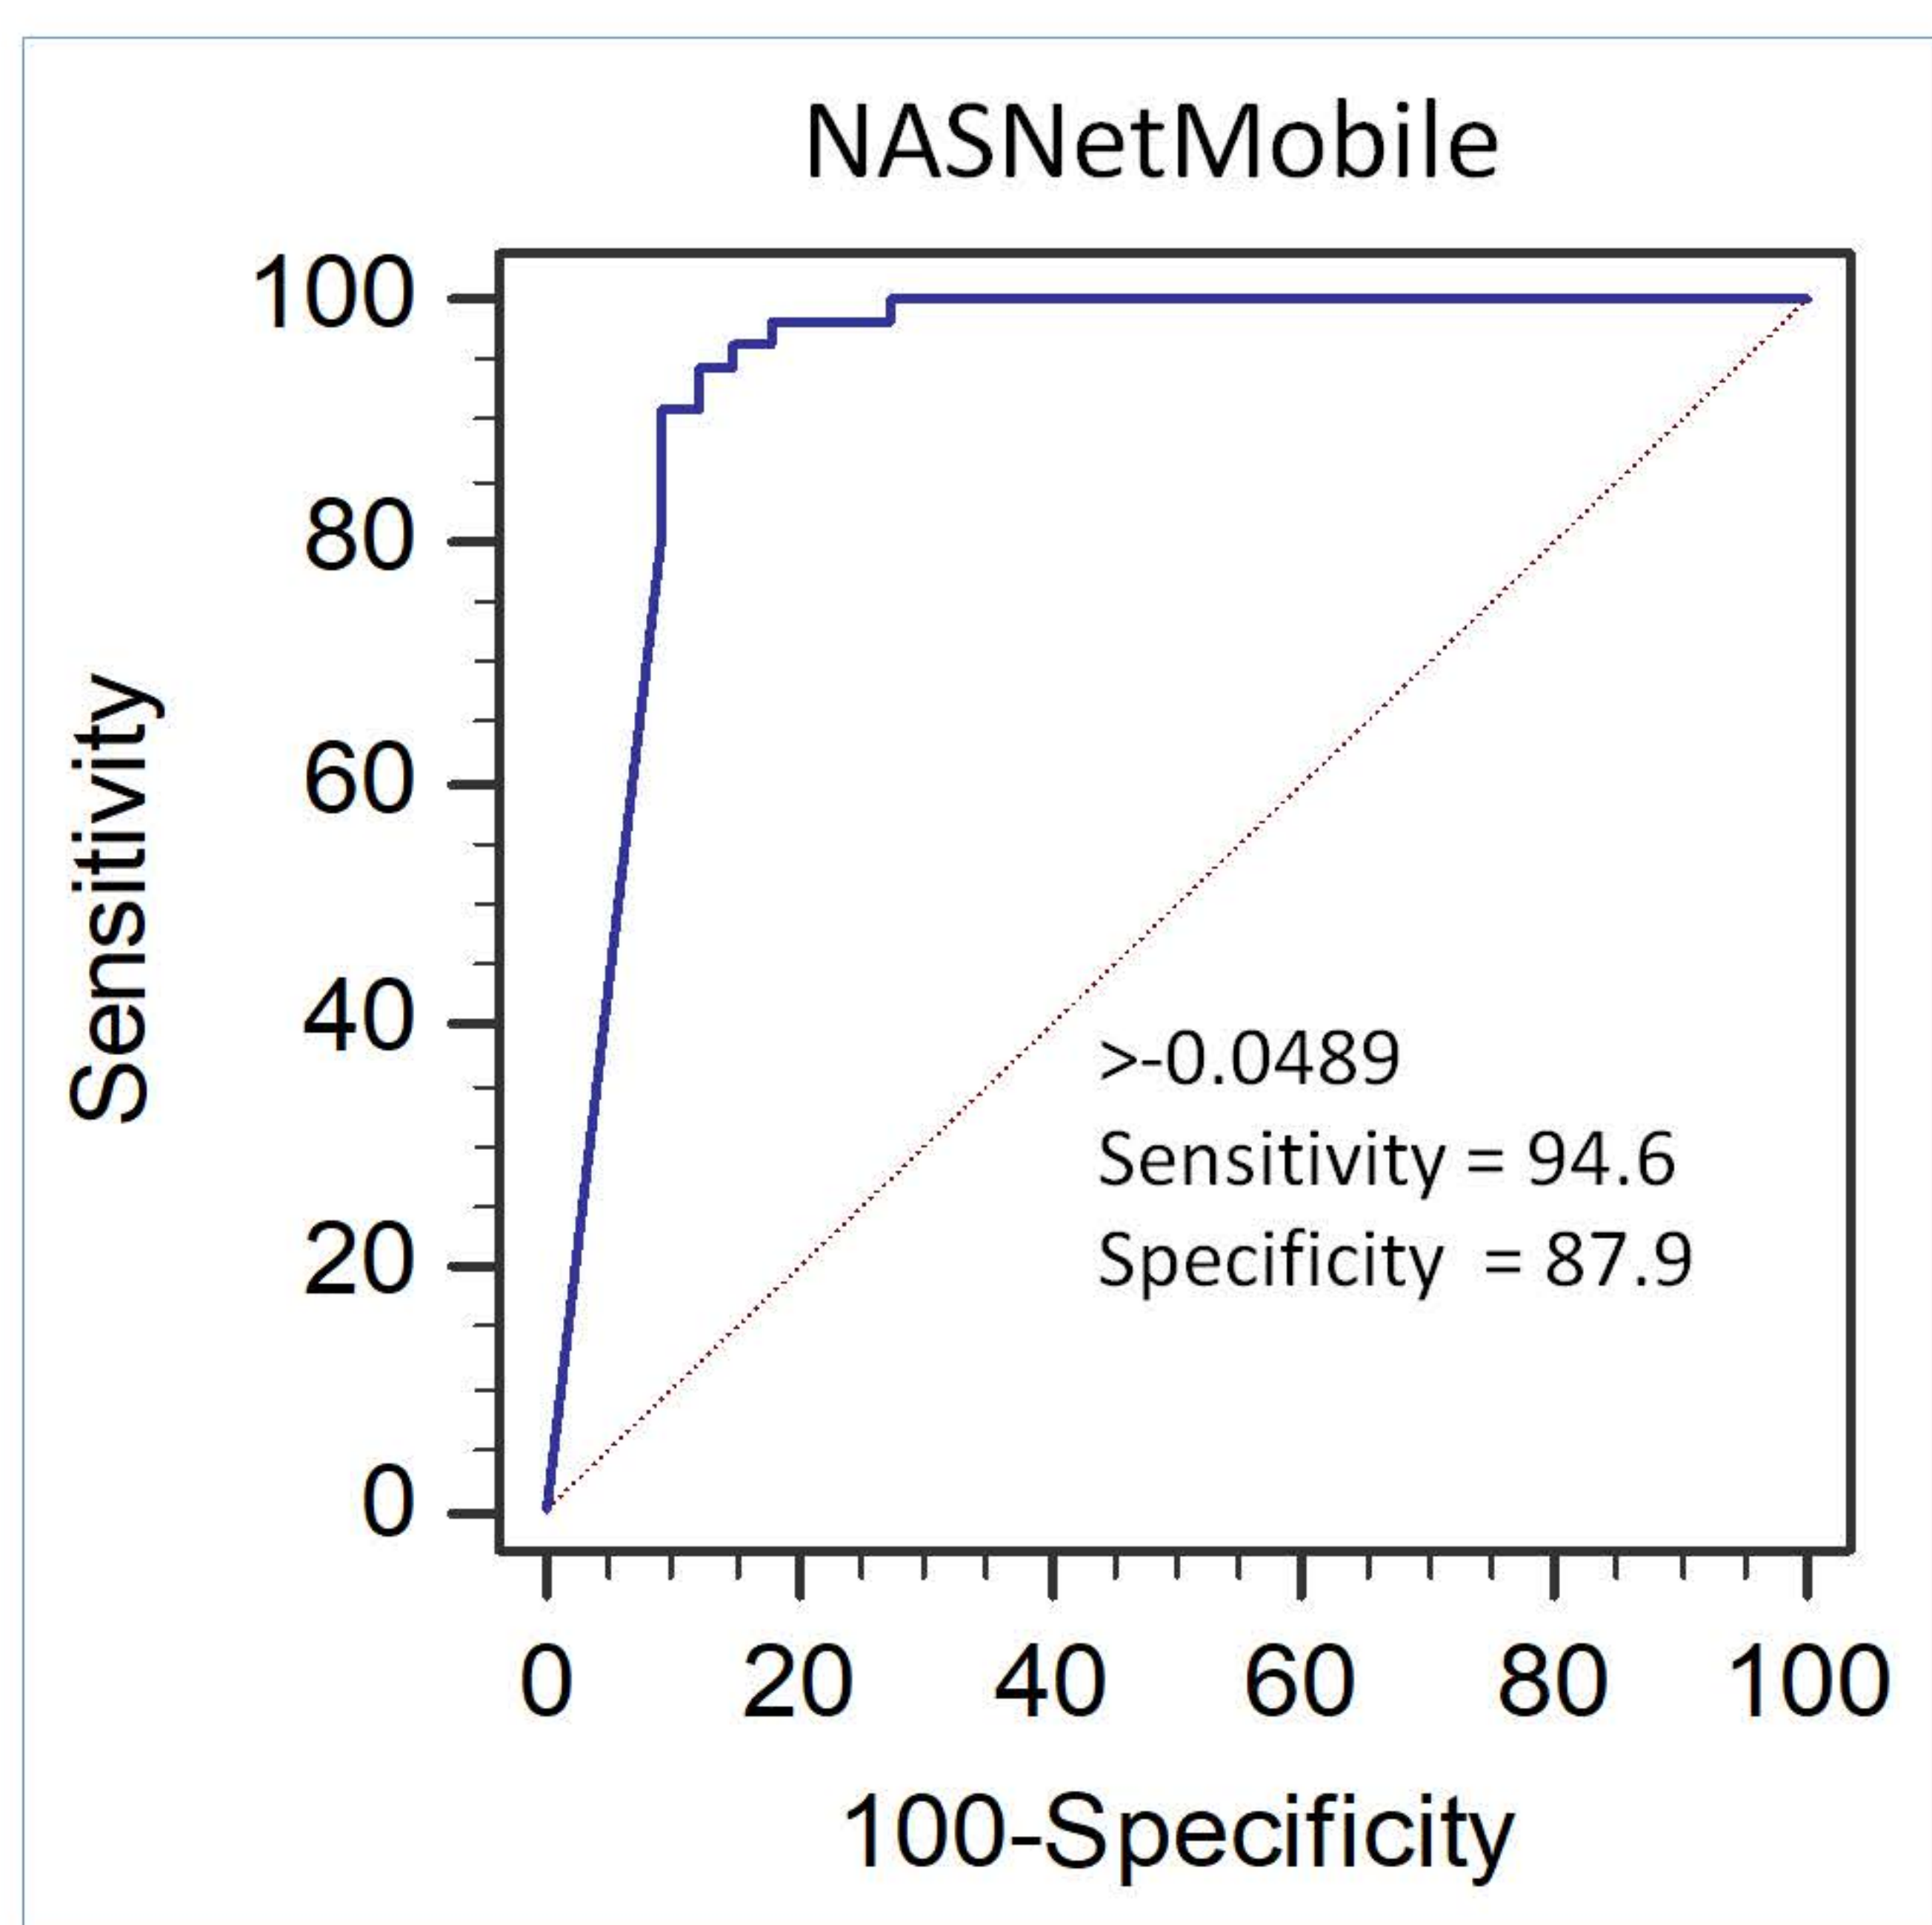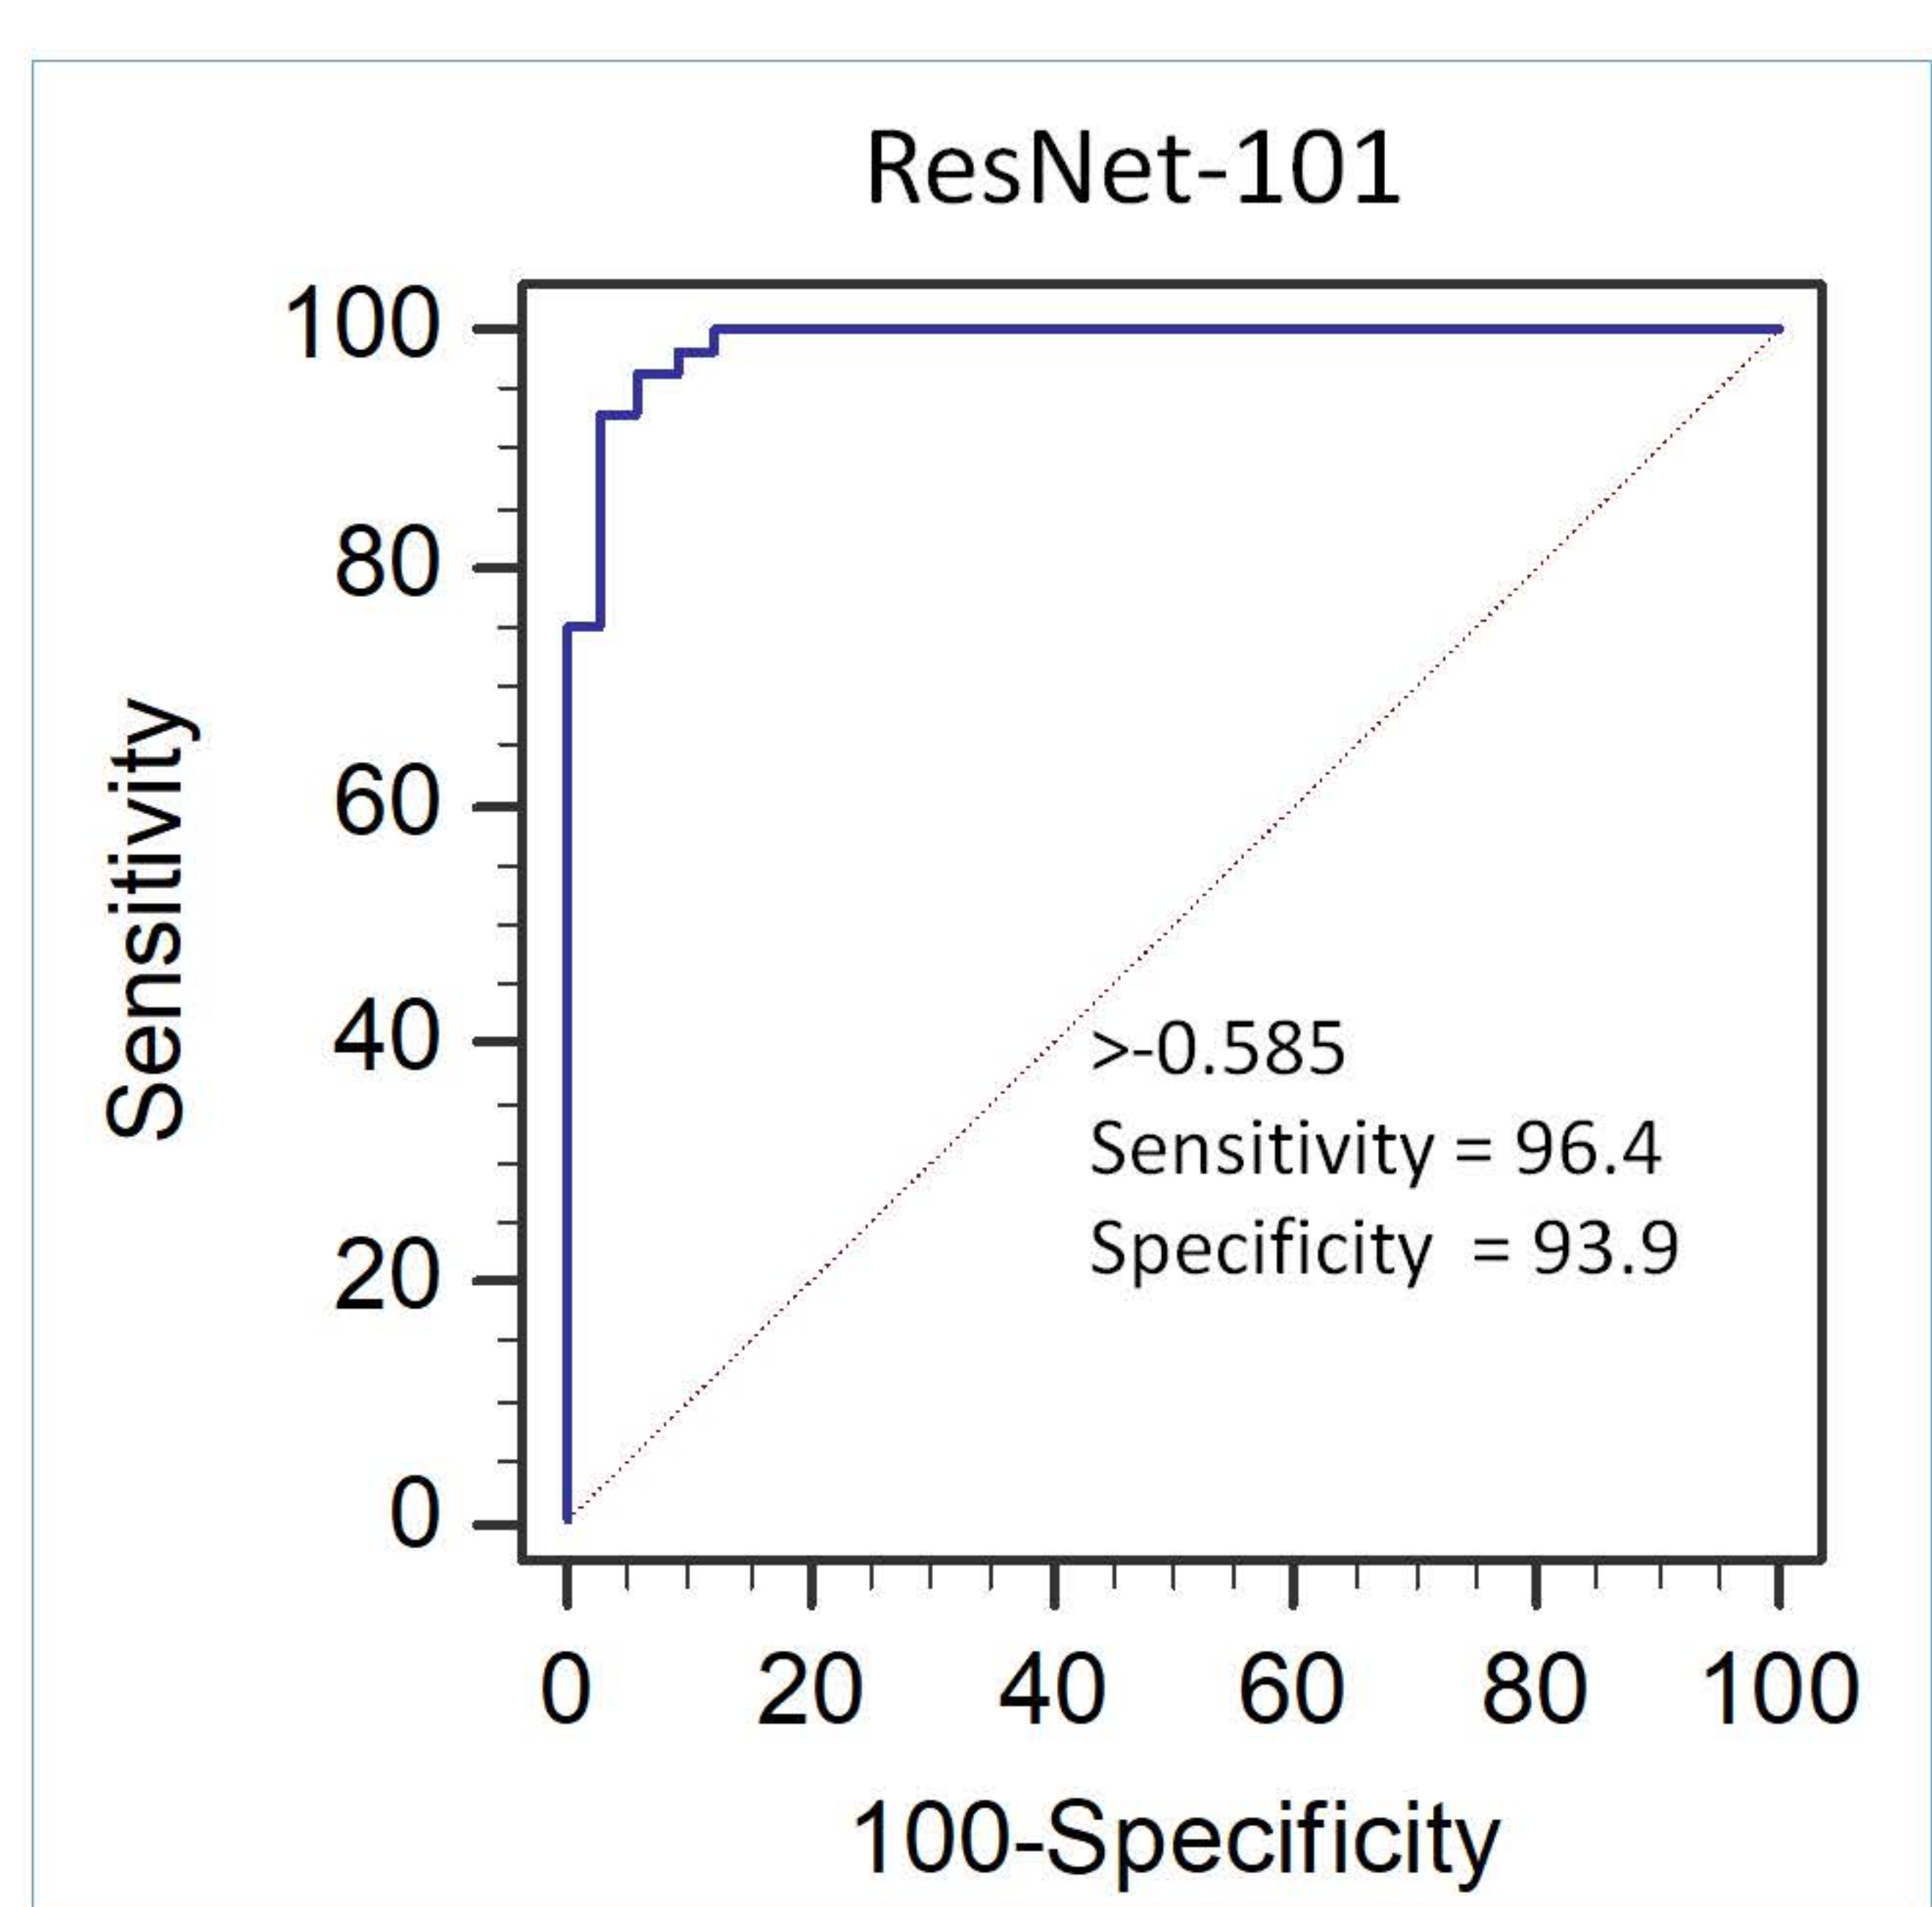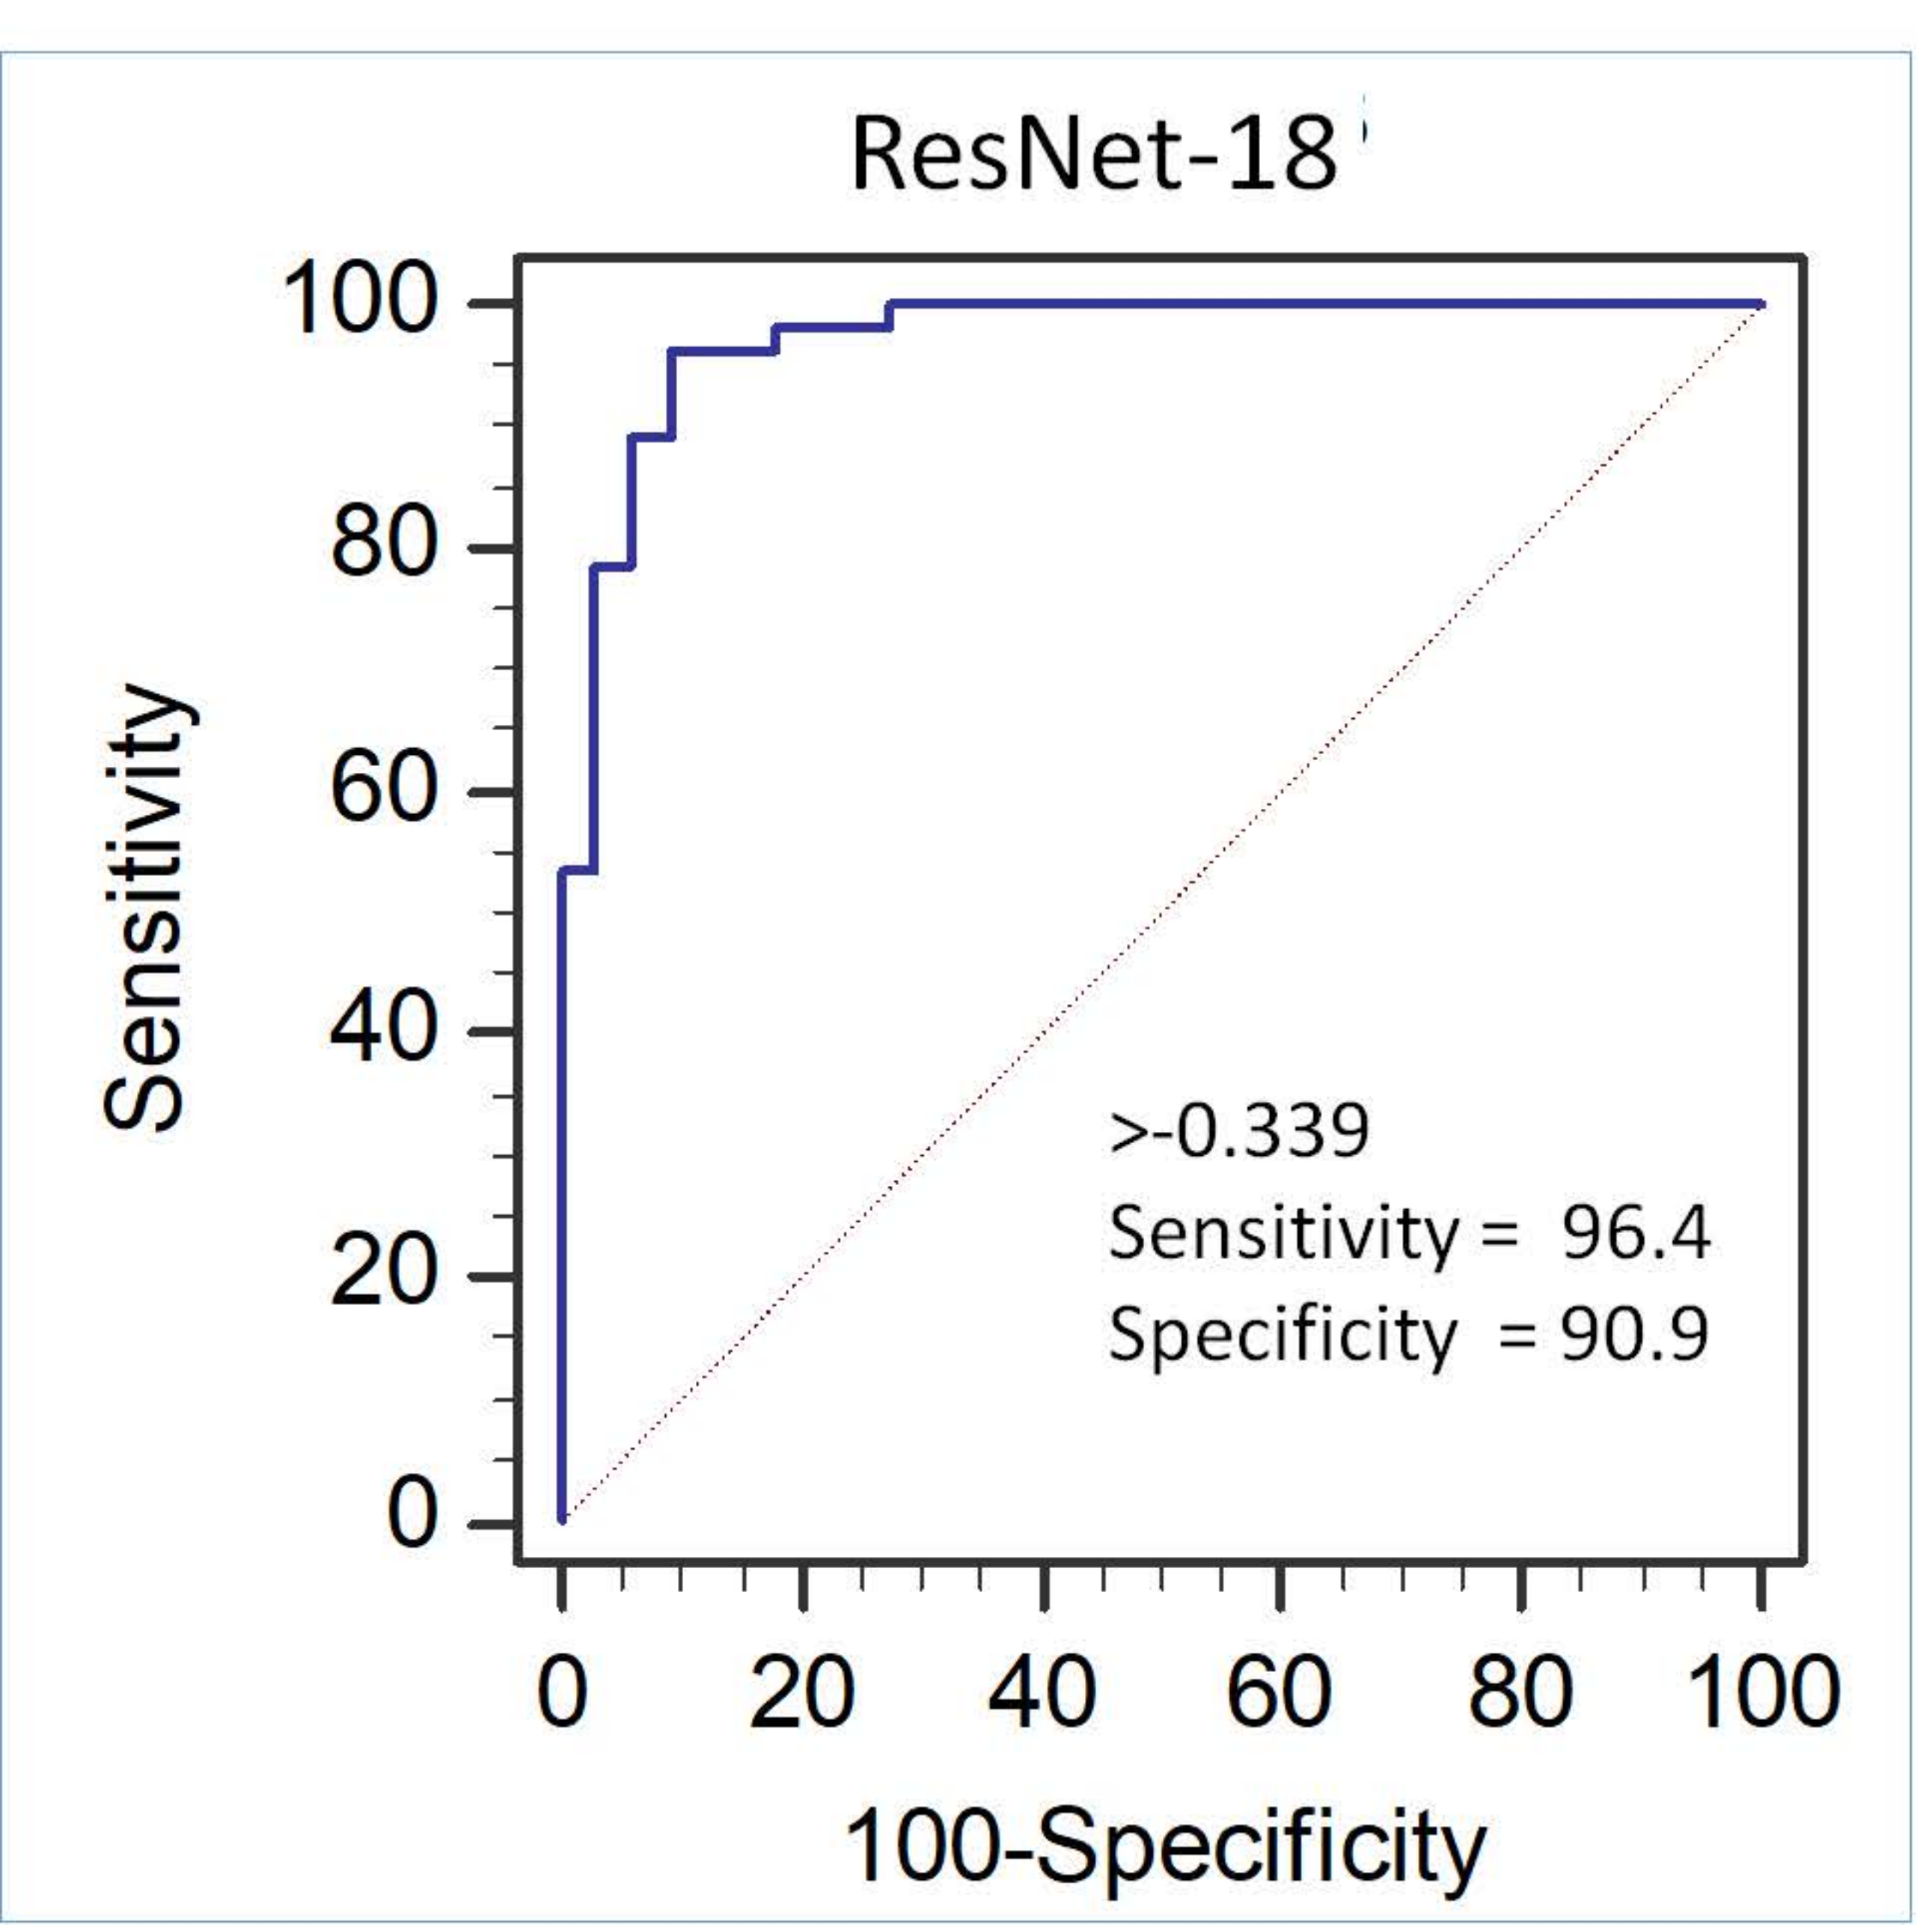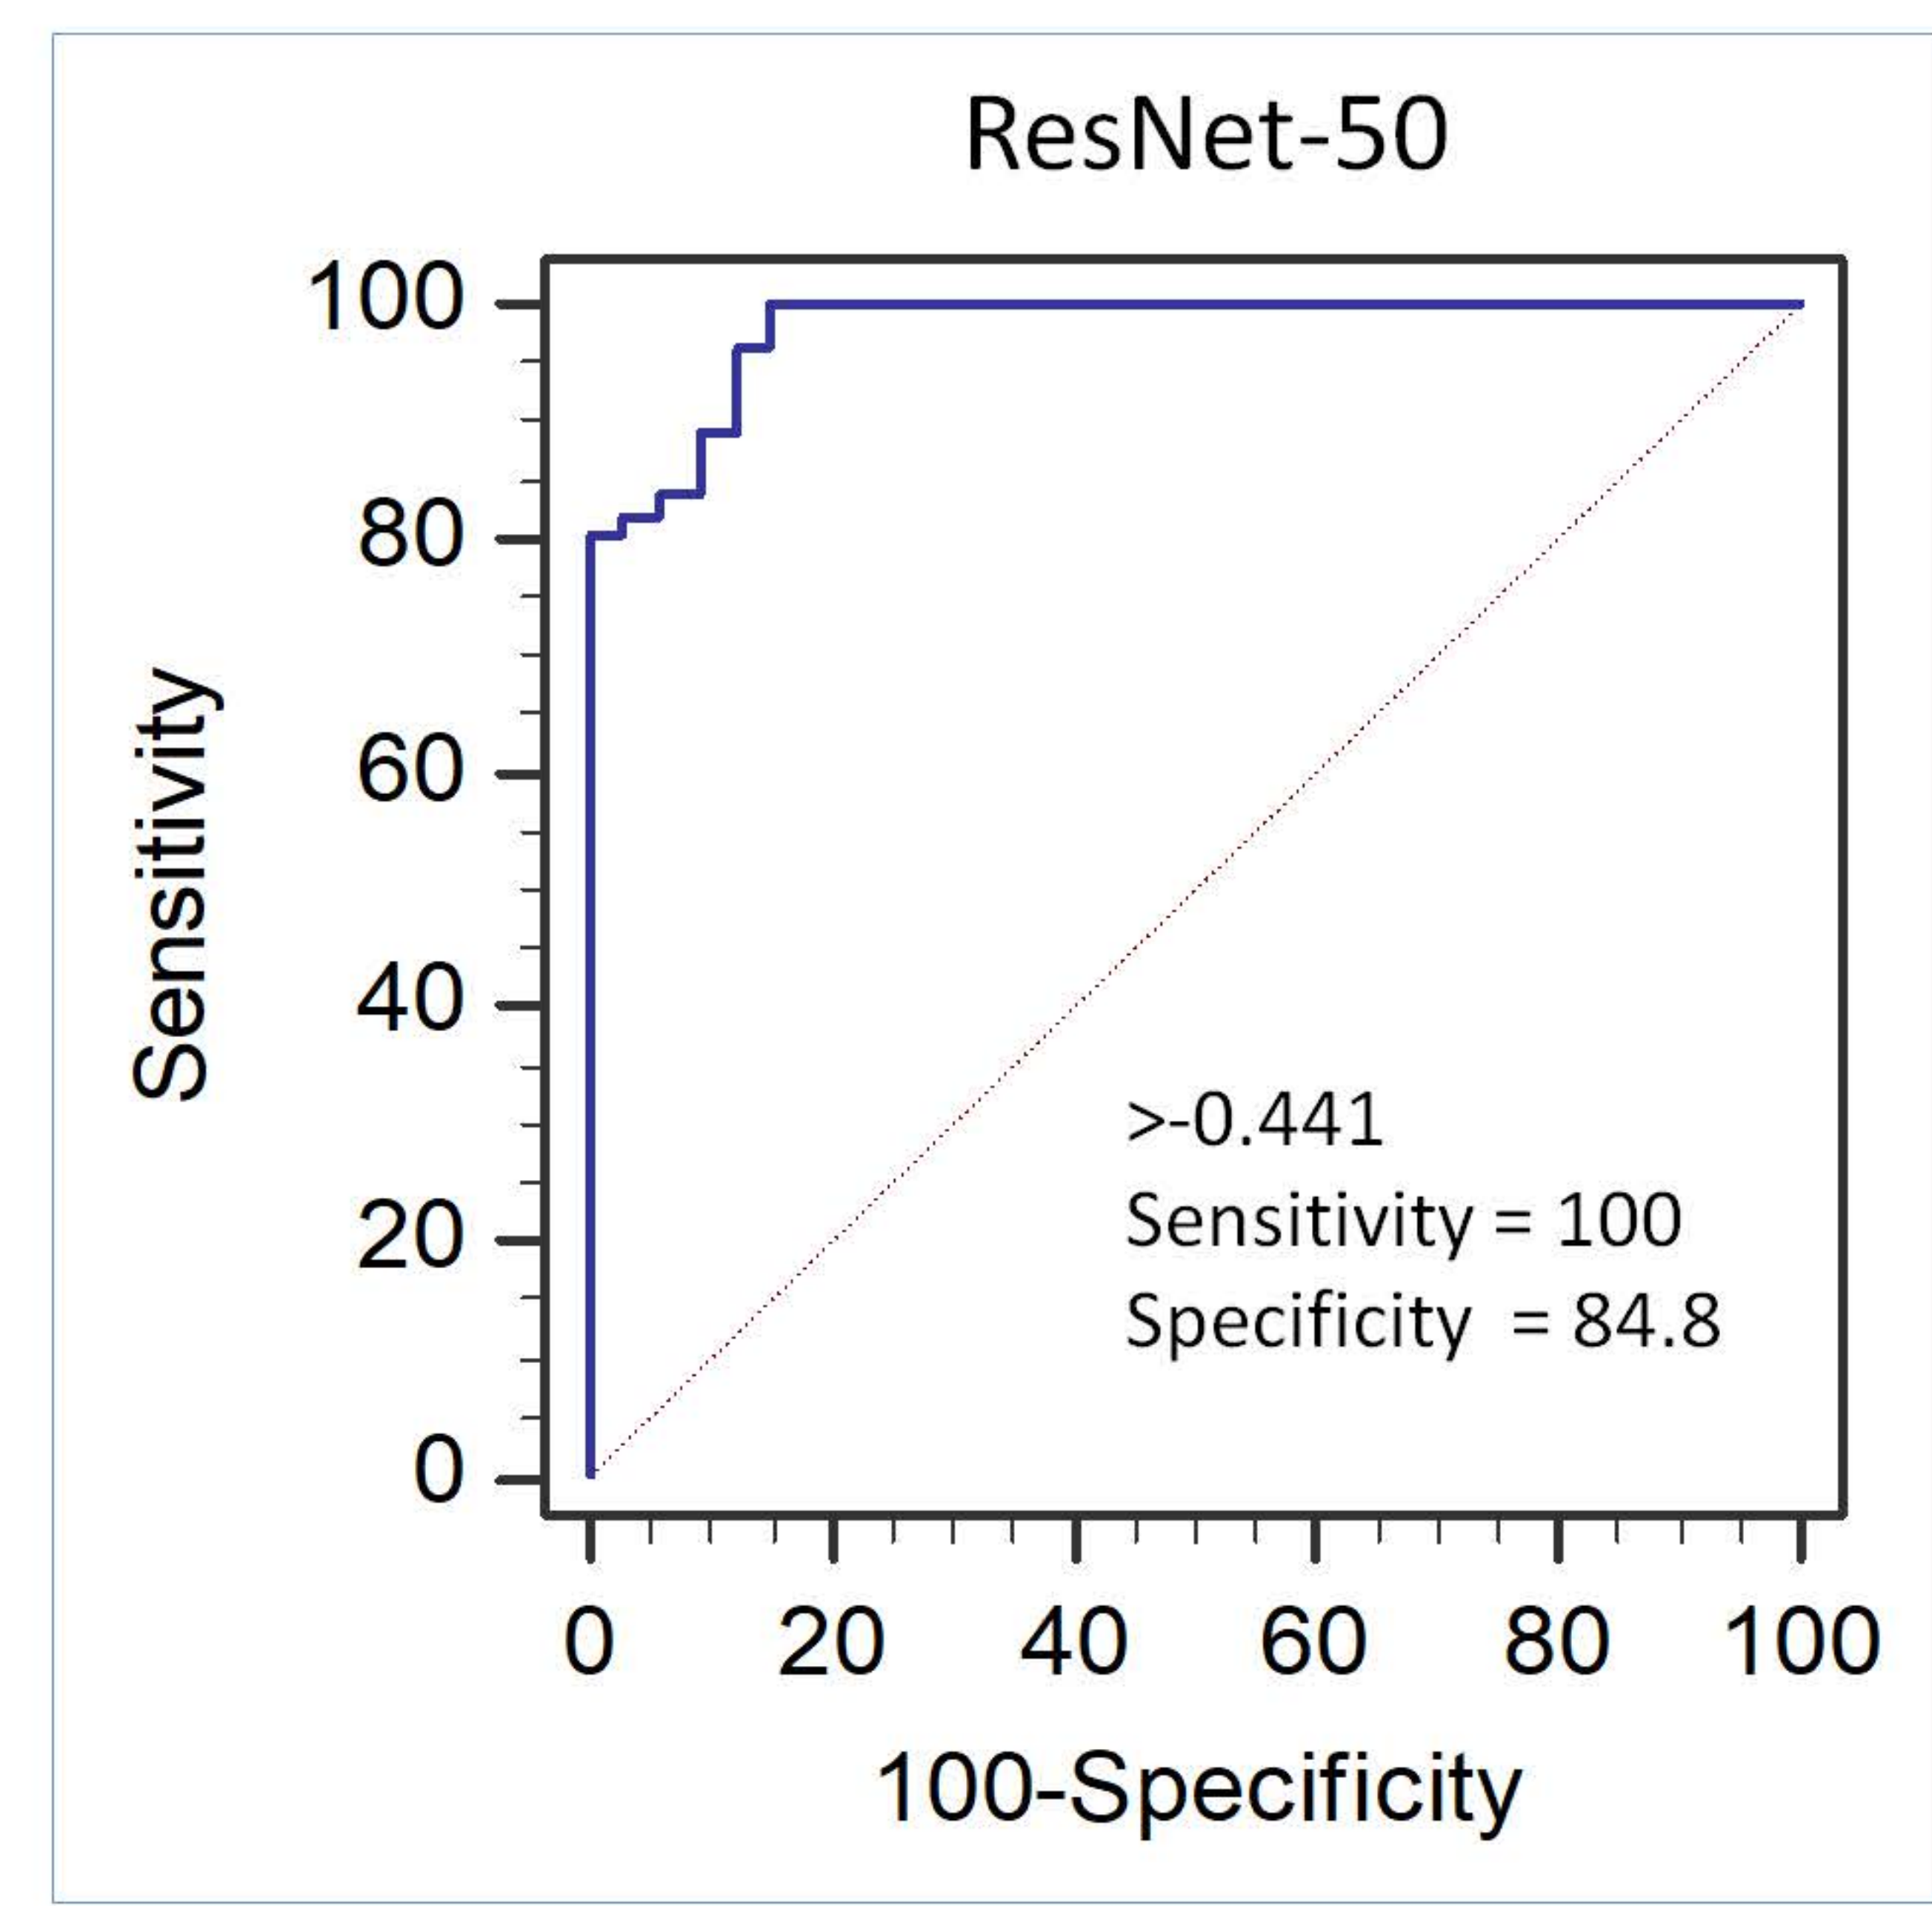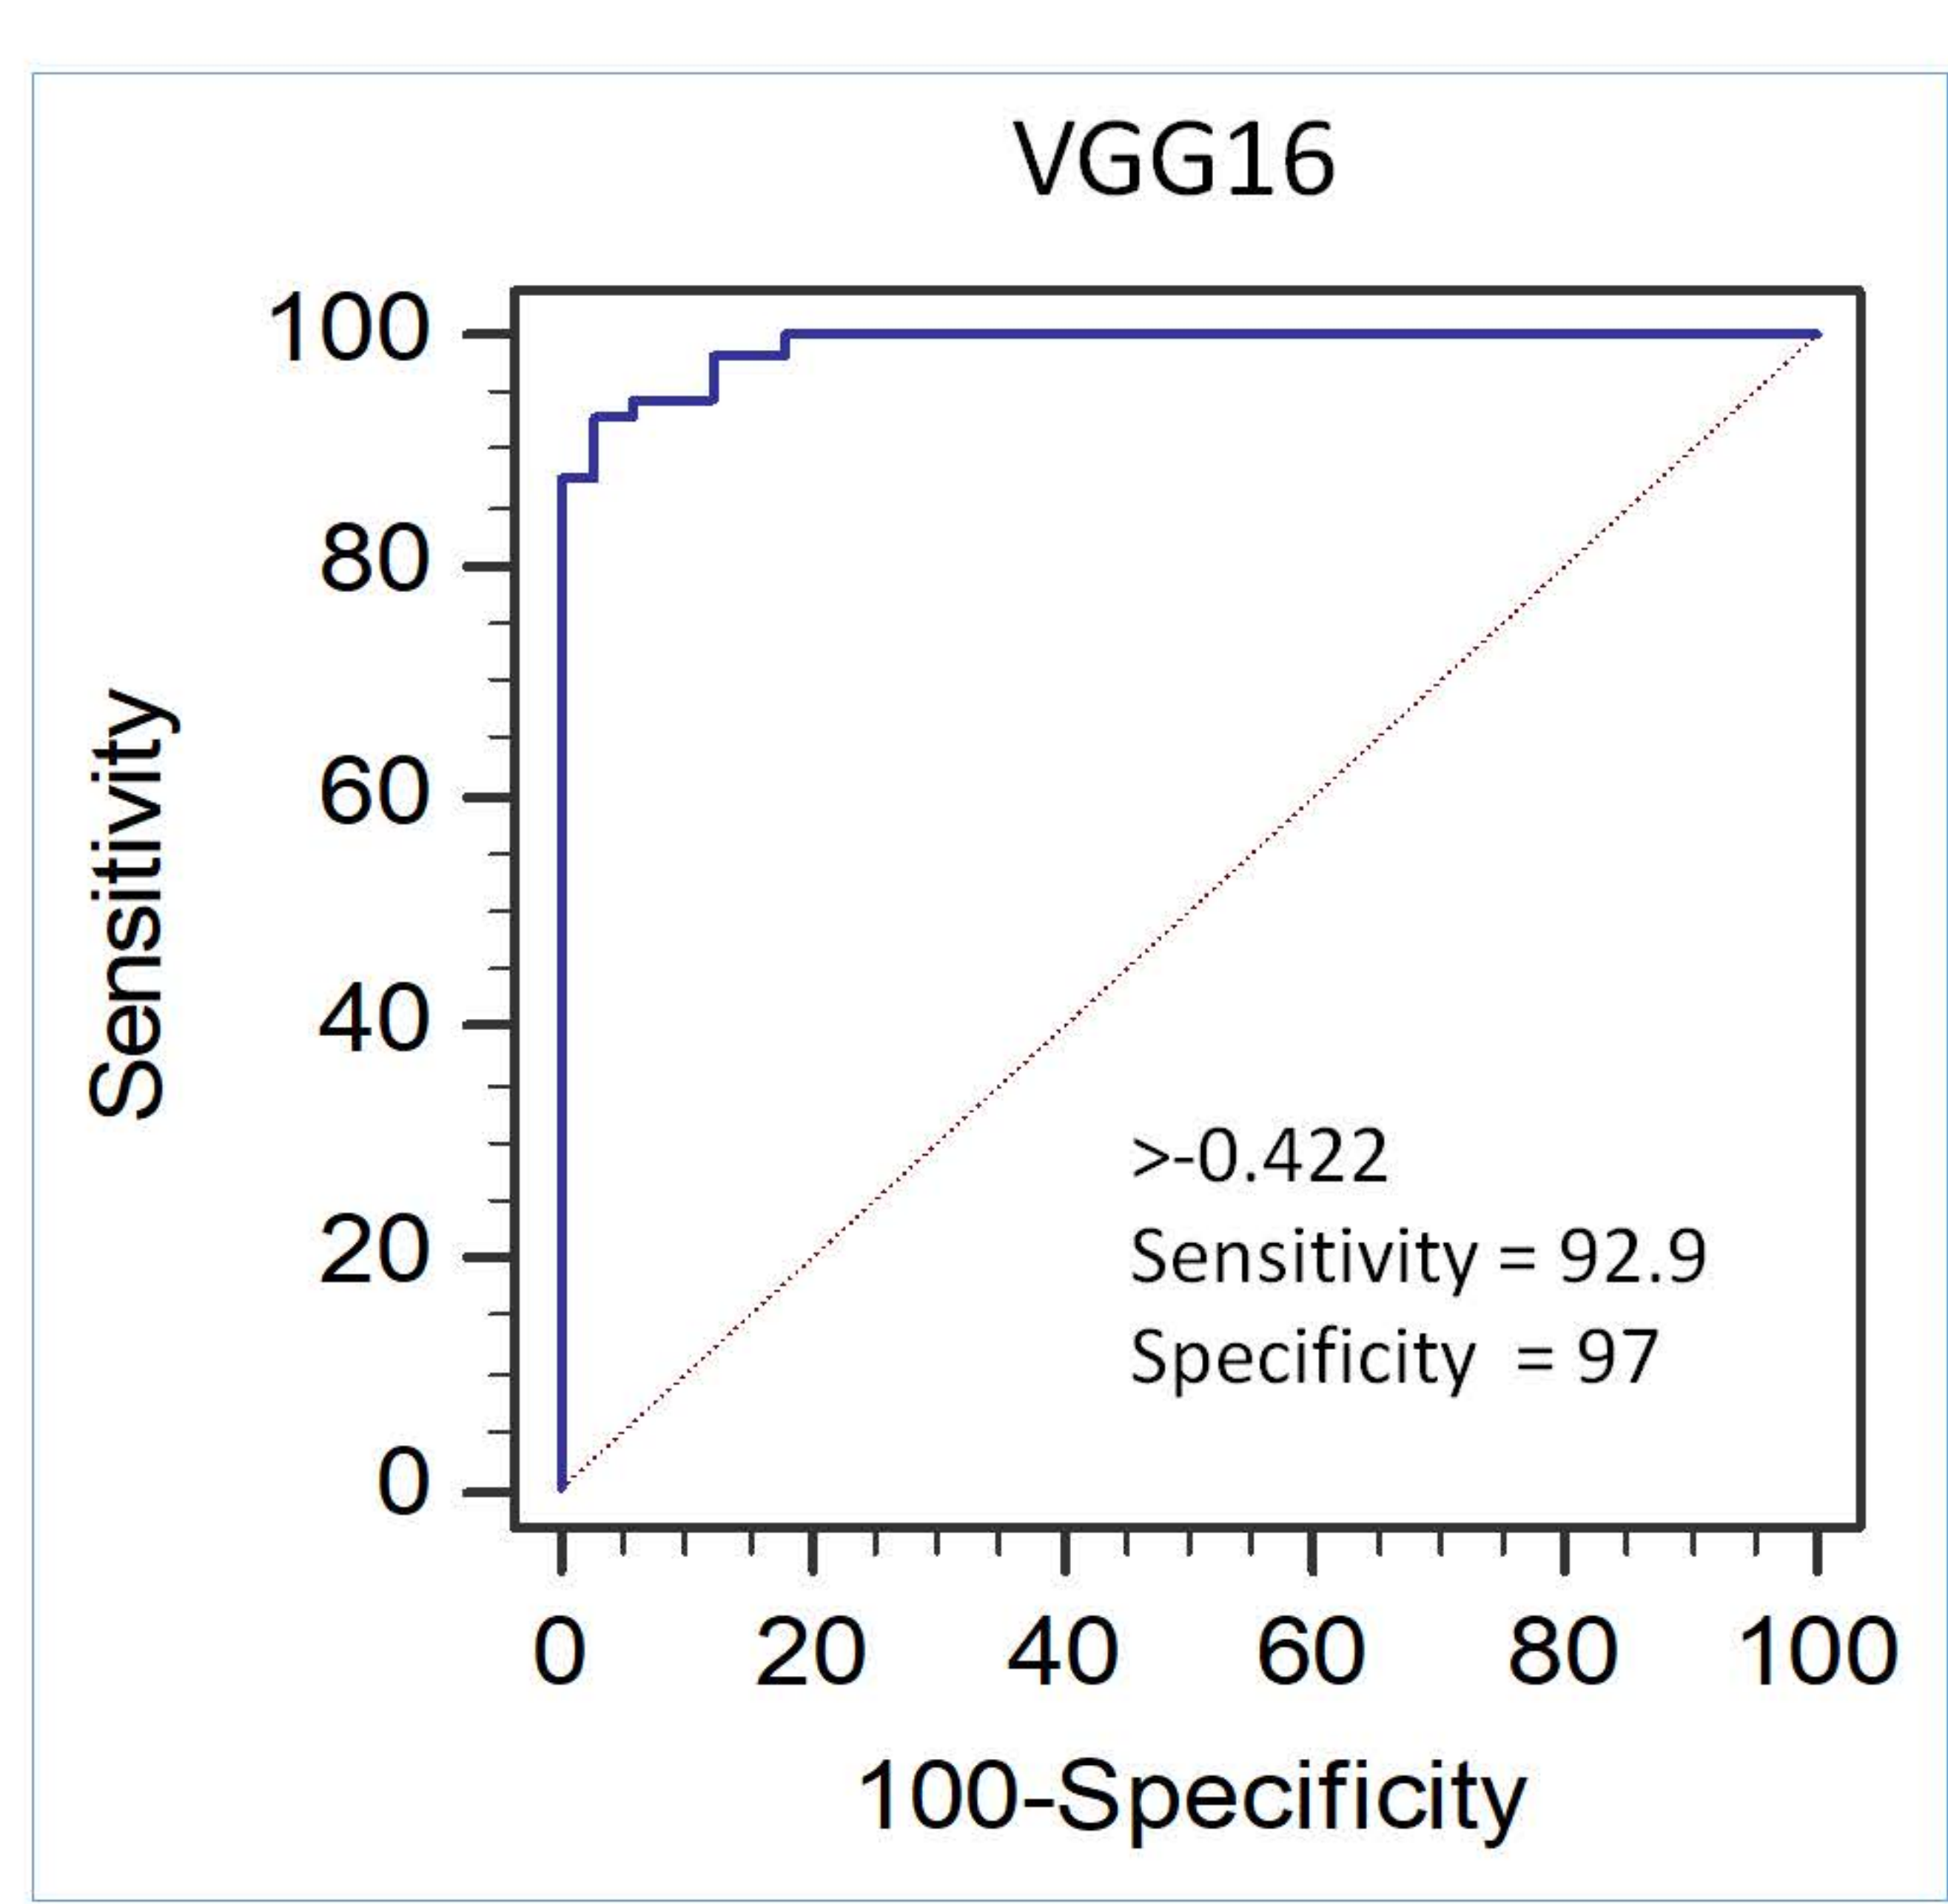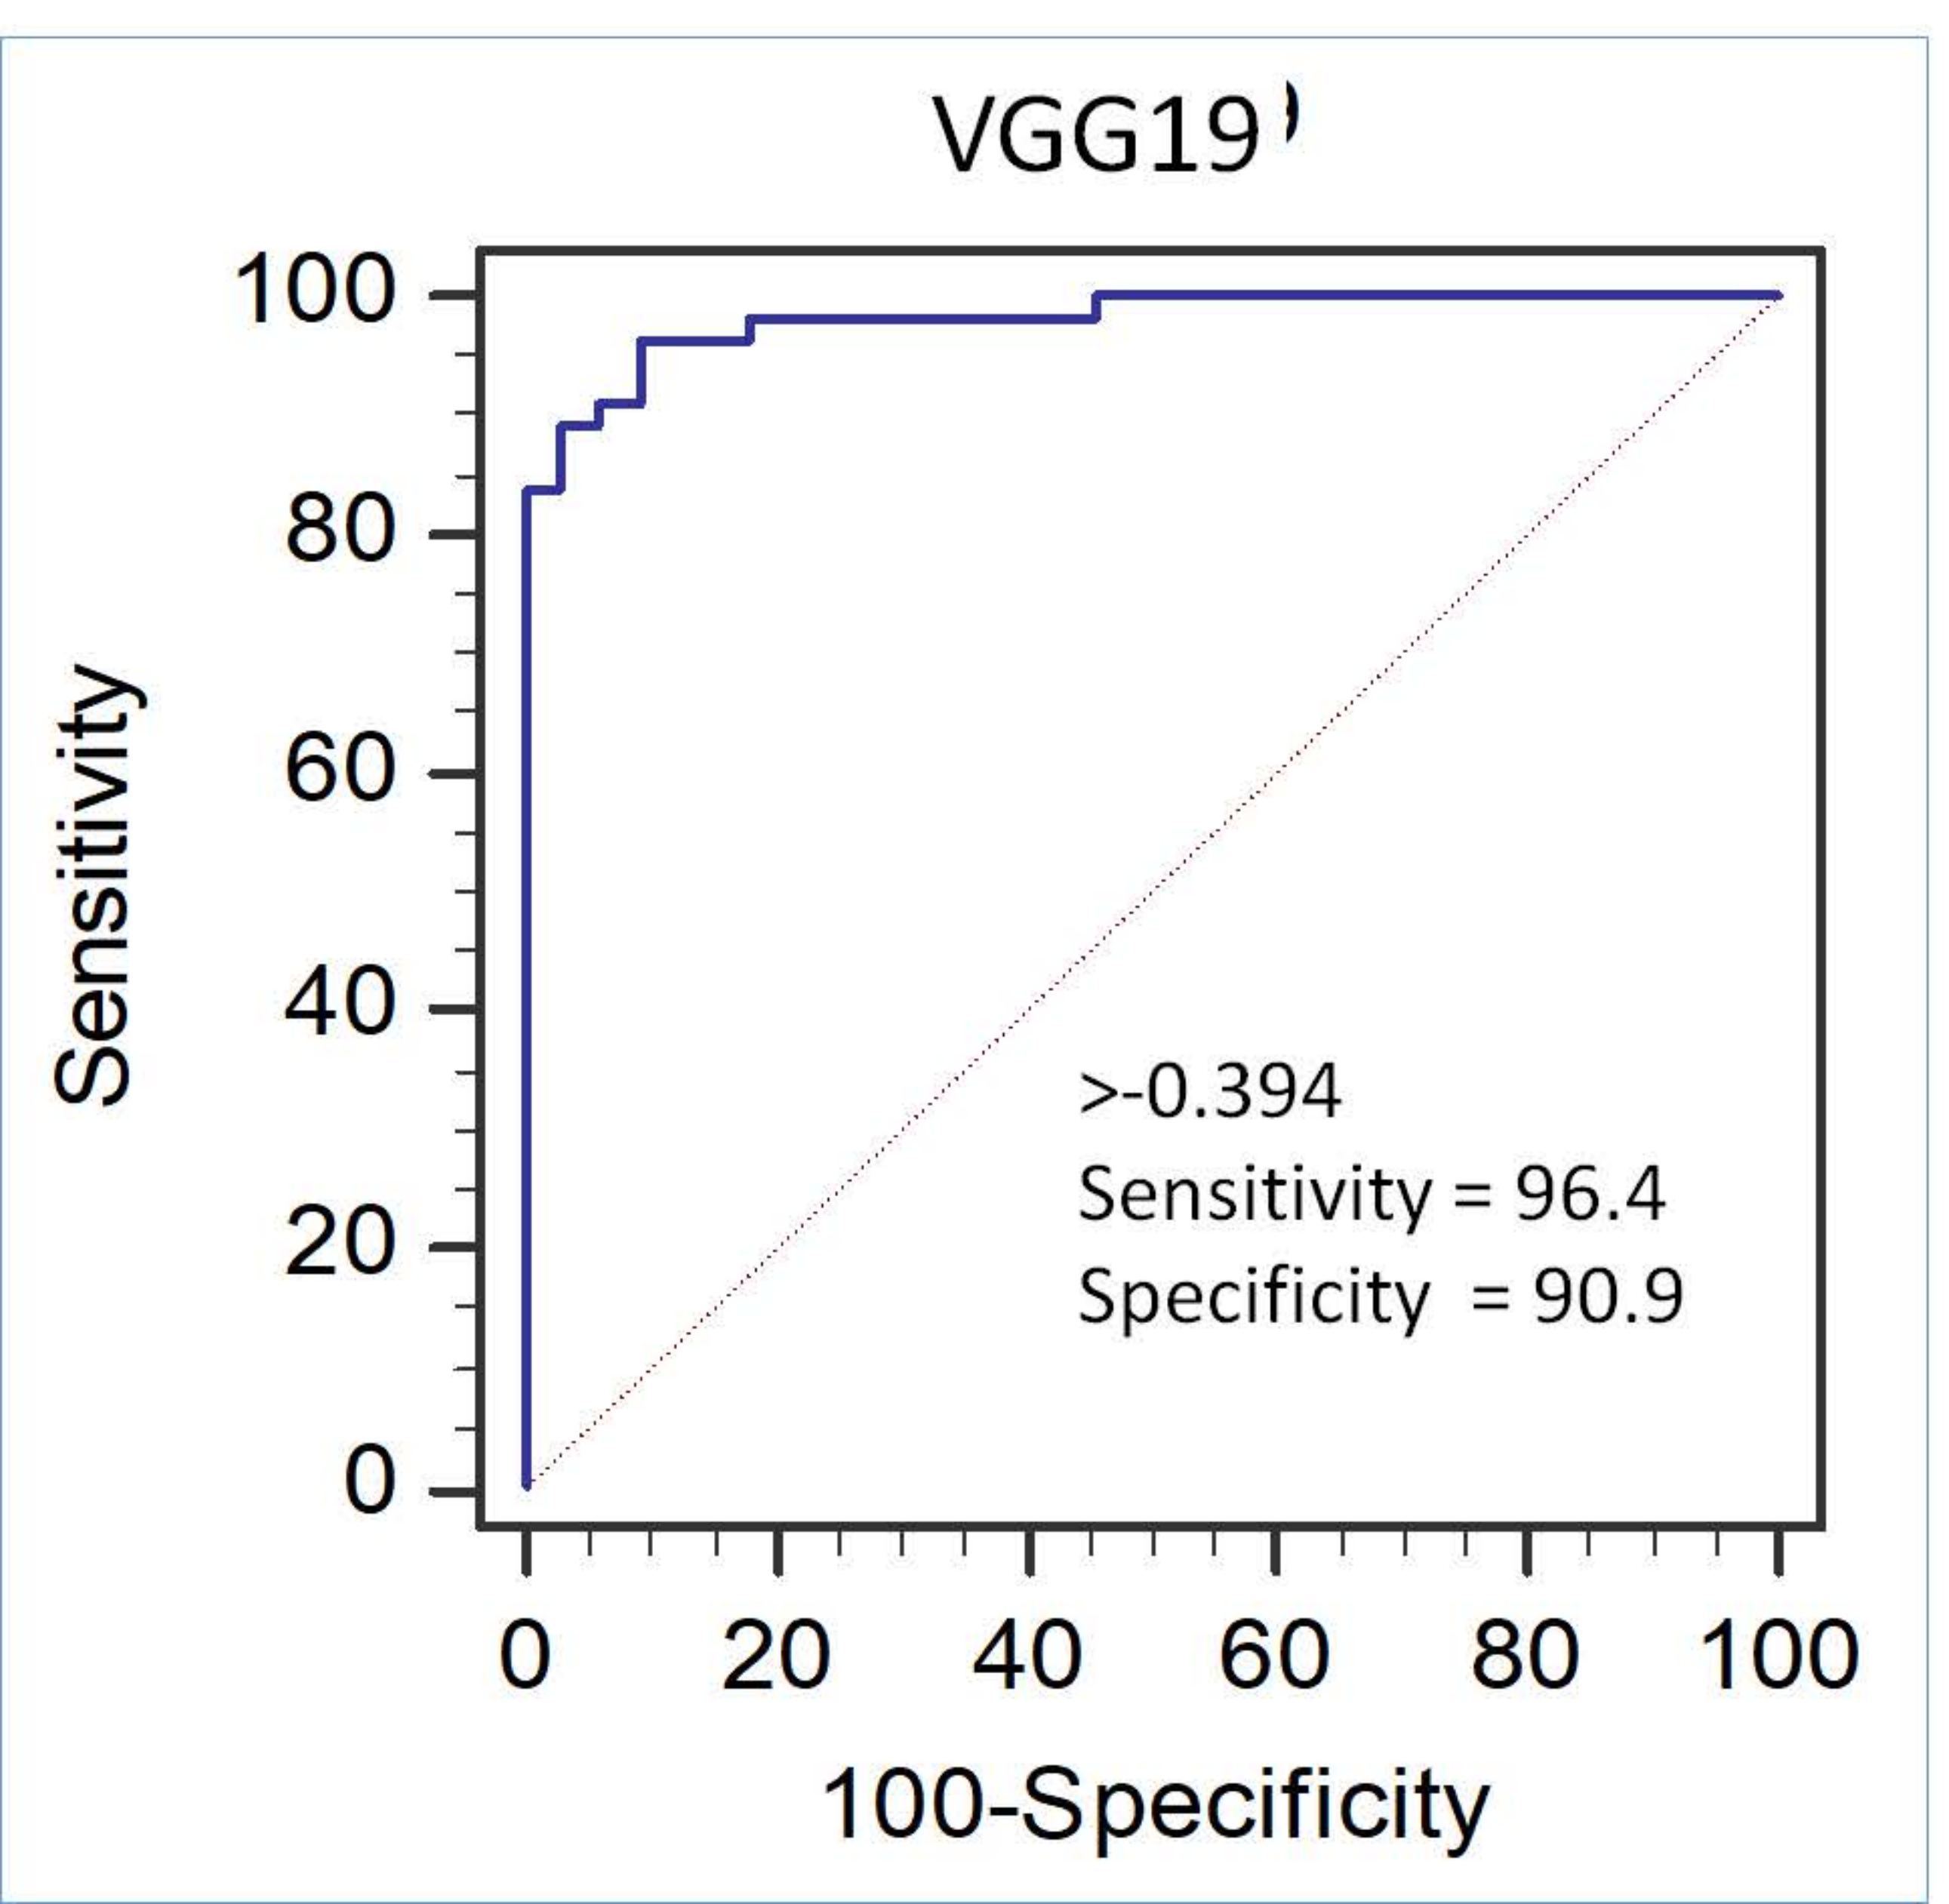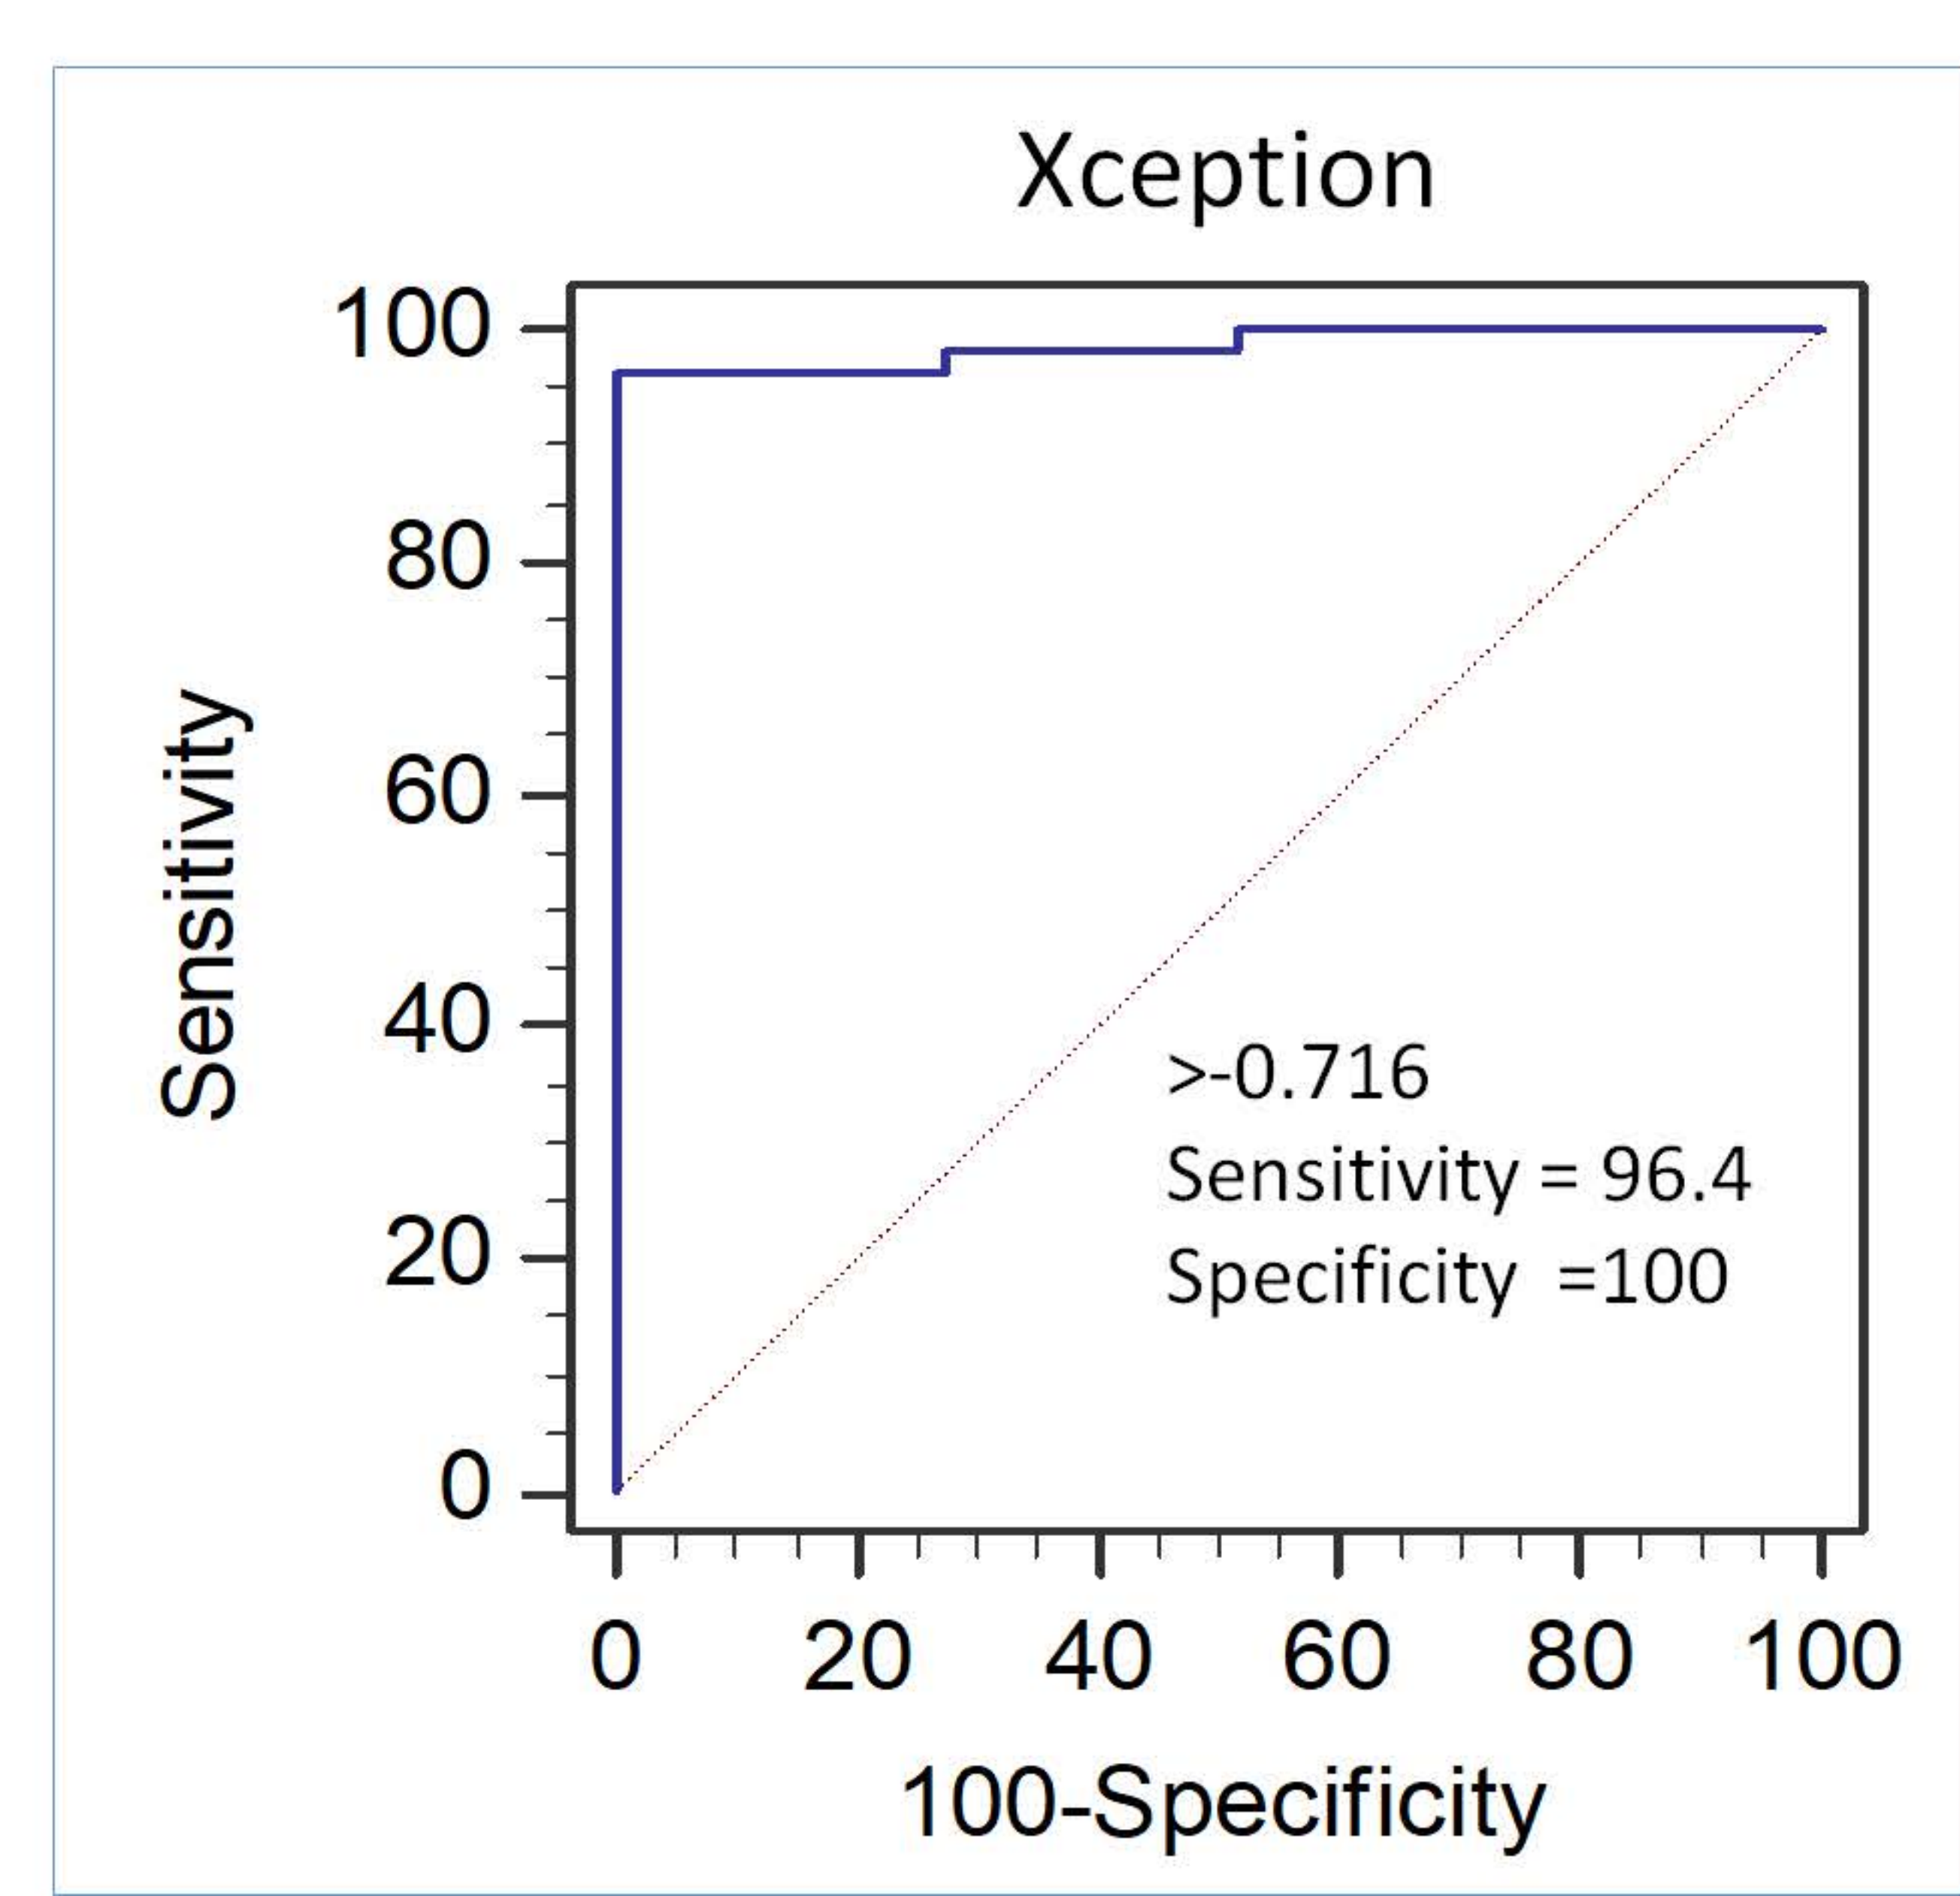

Supplement: s1 [file s1]

Sub-sites

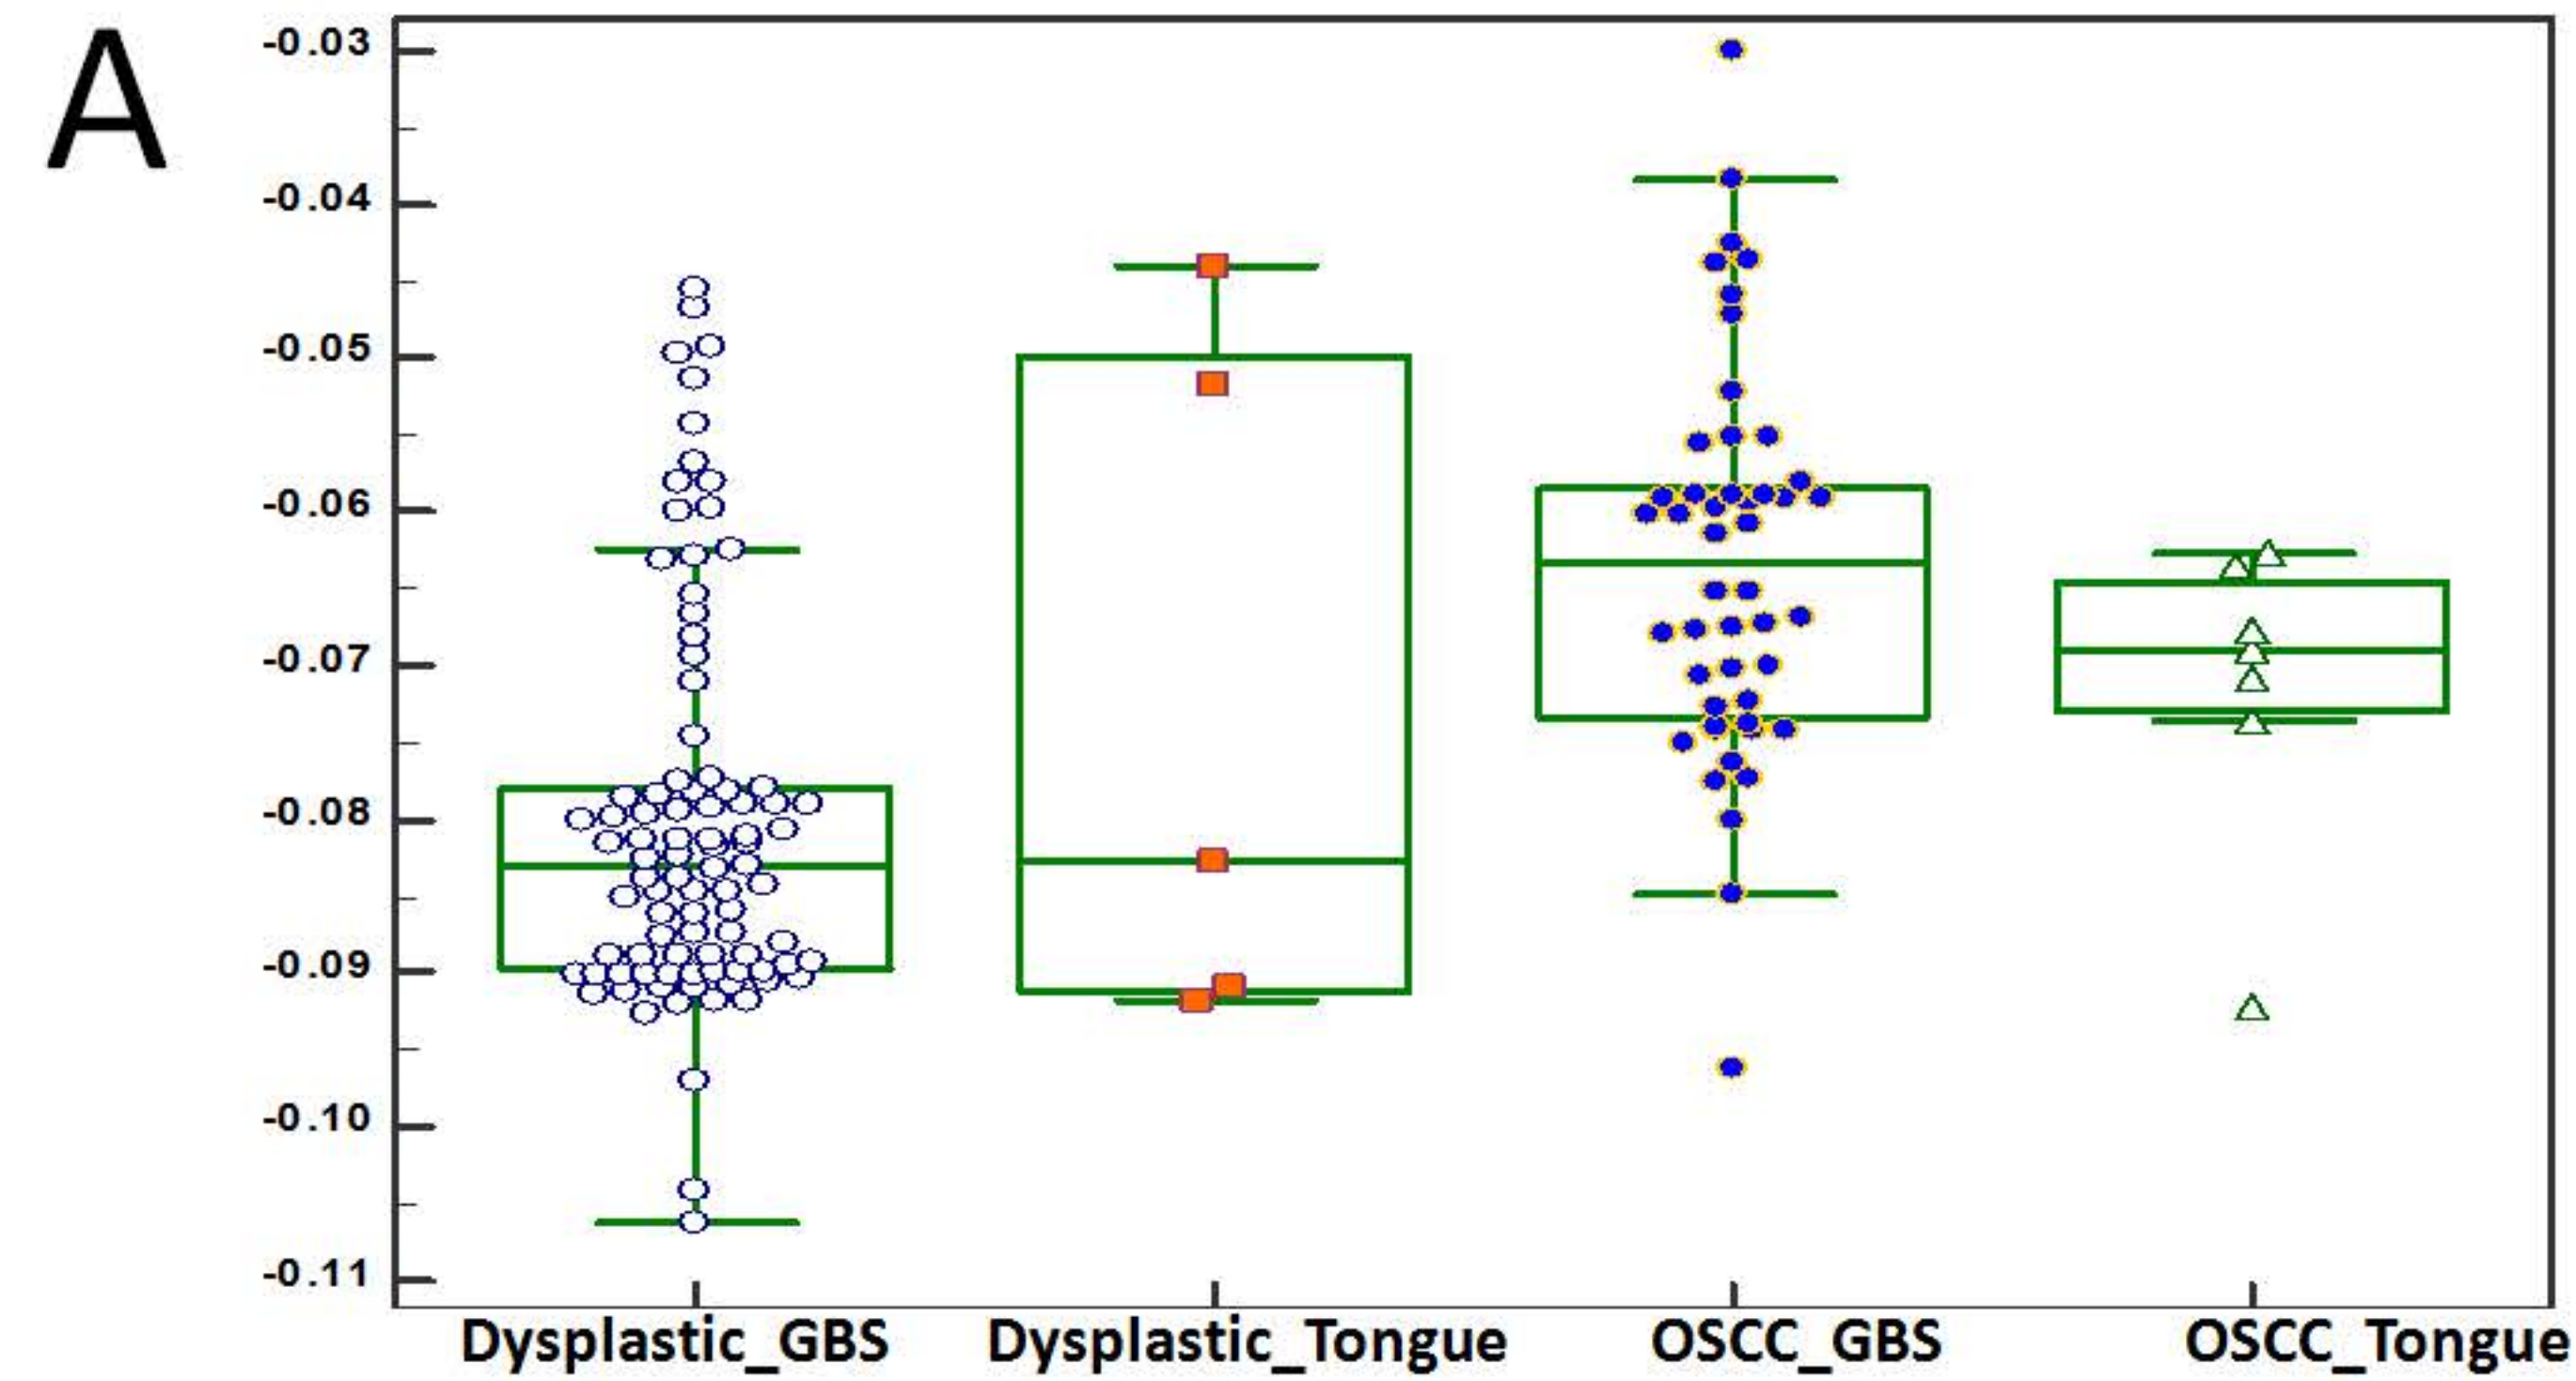

Gender

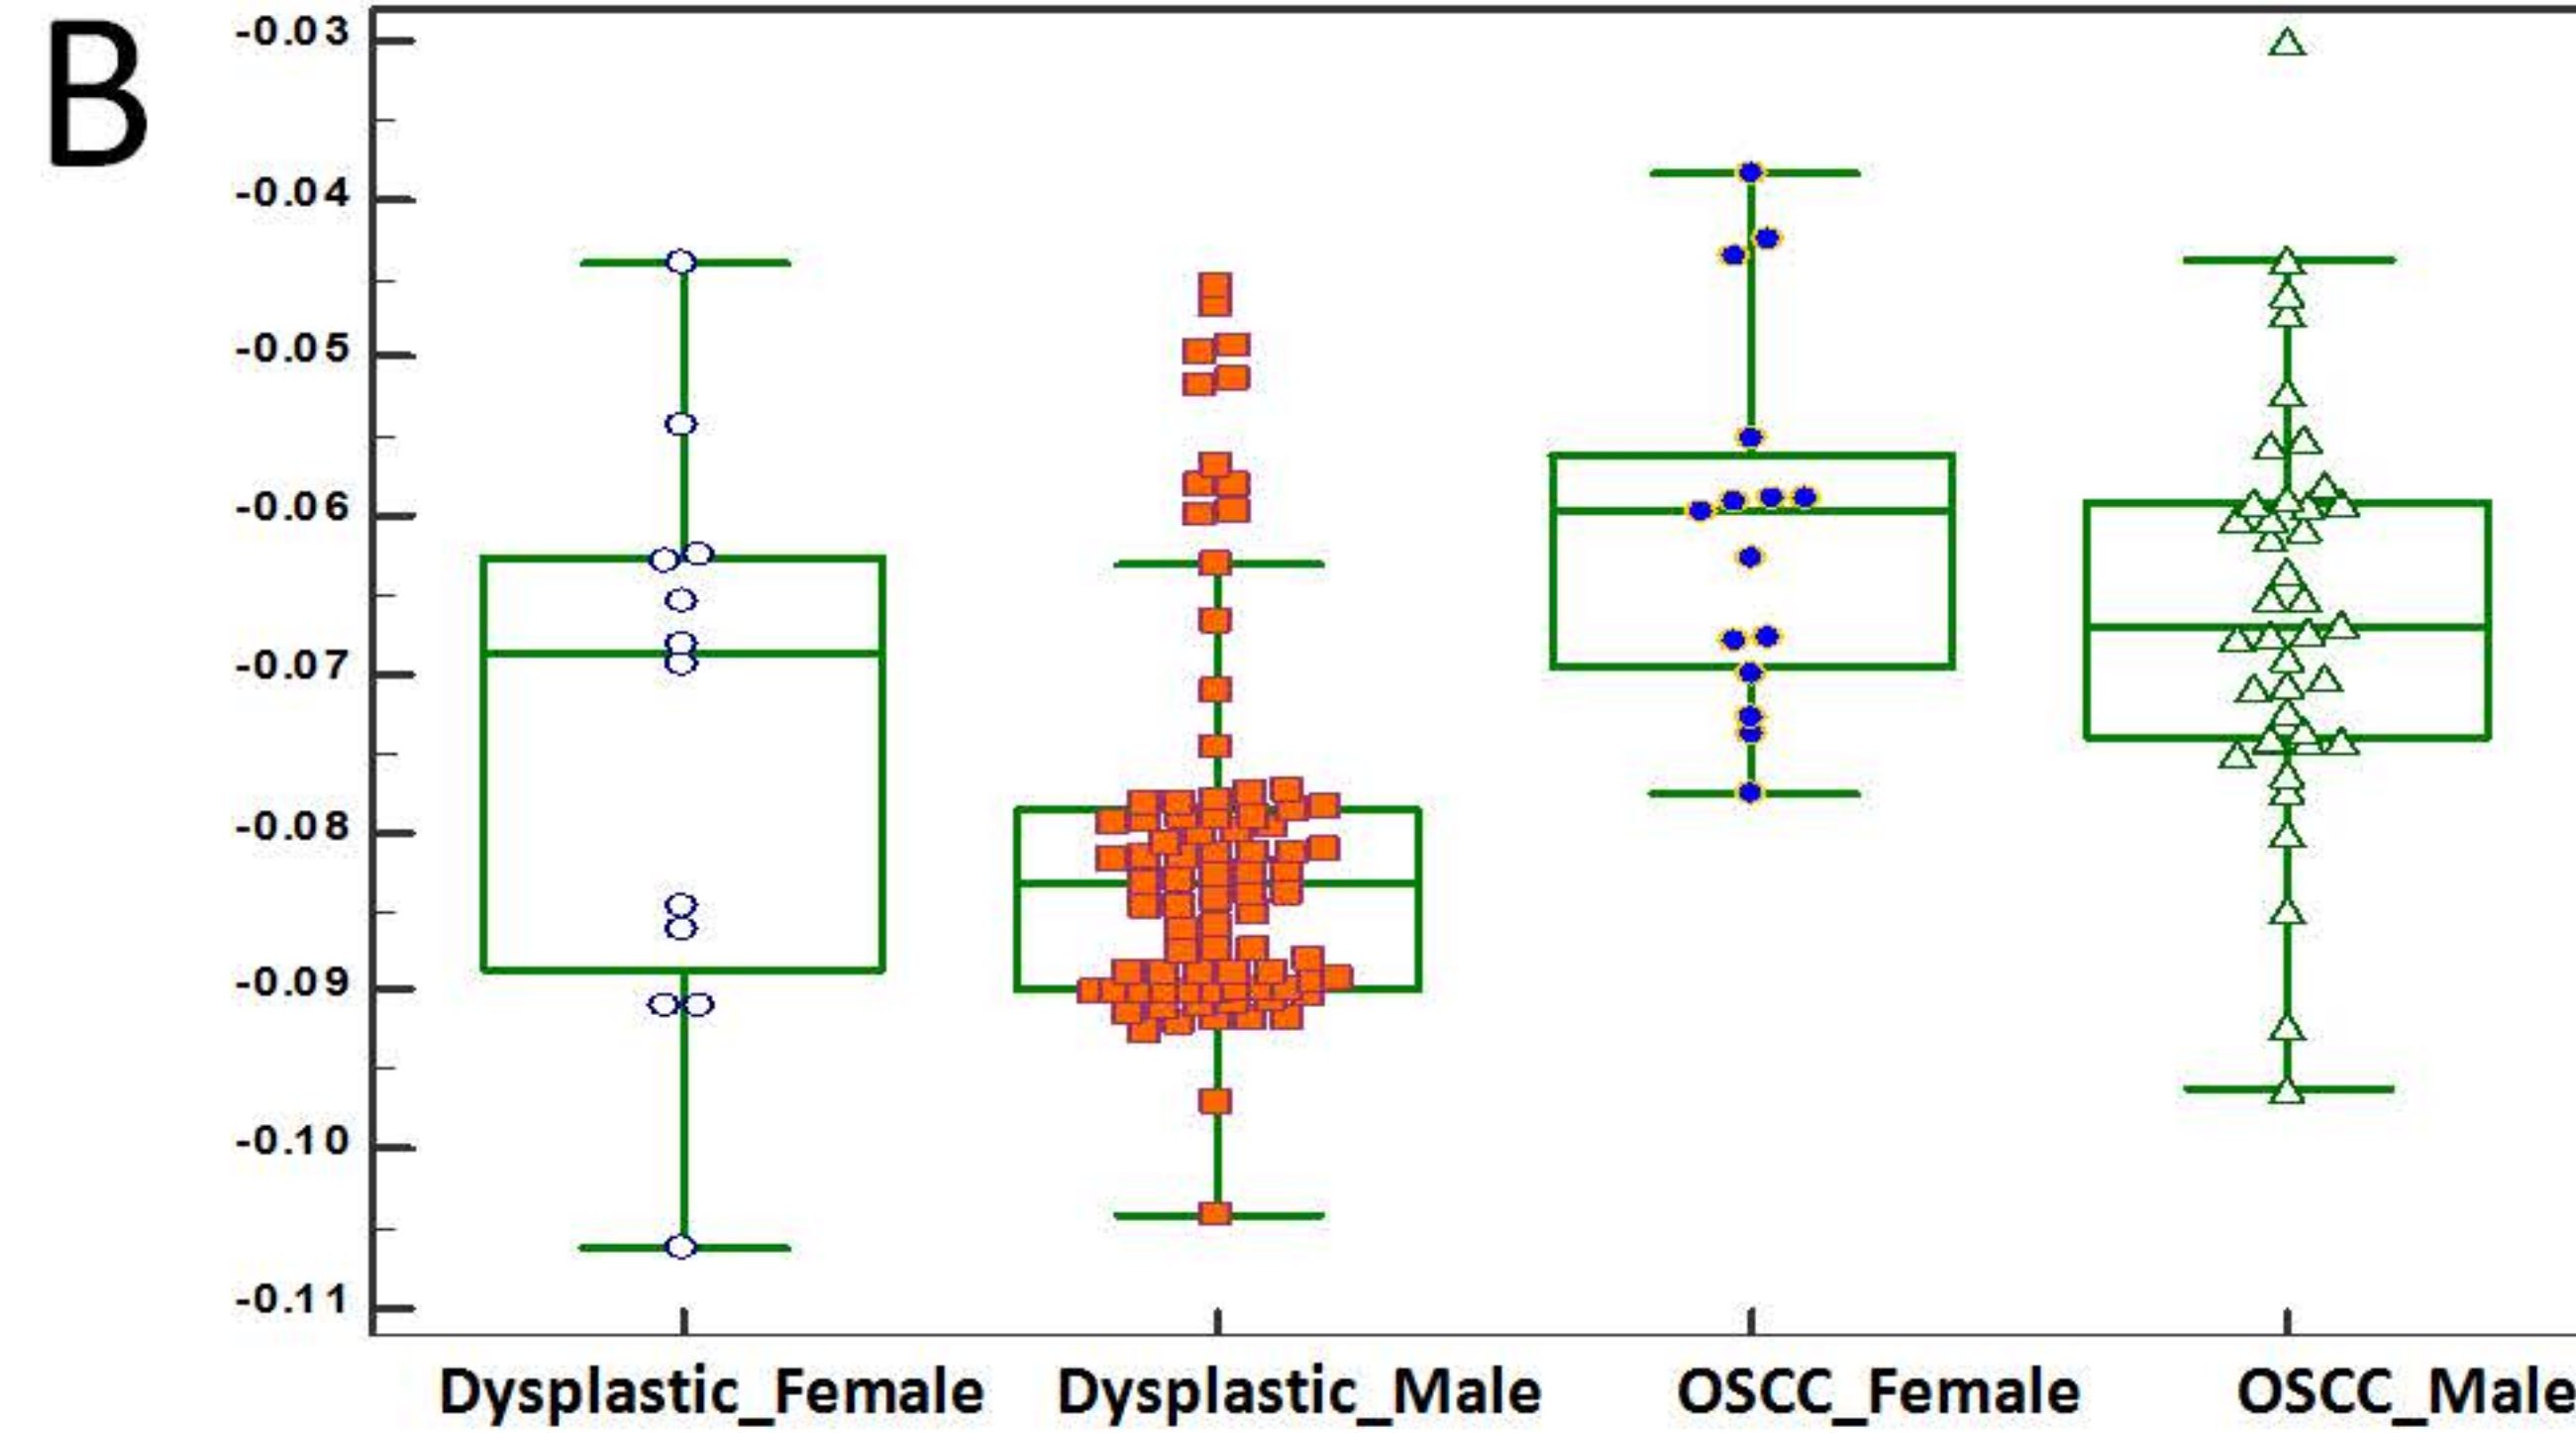

Age

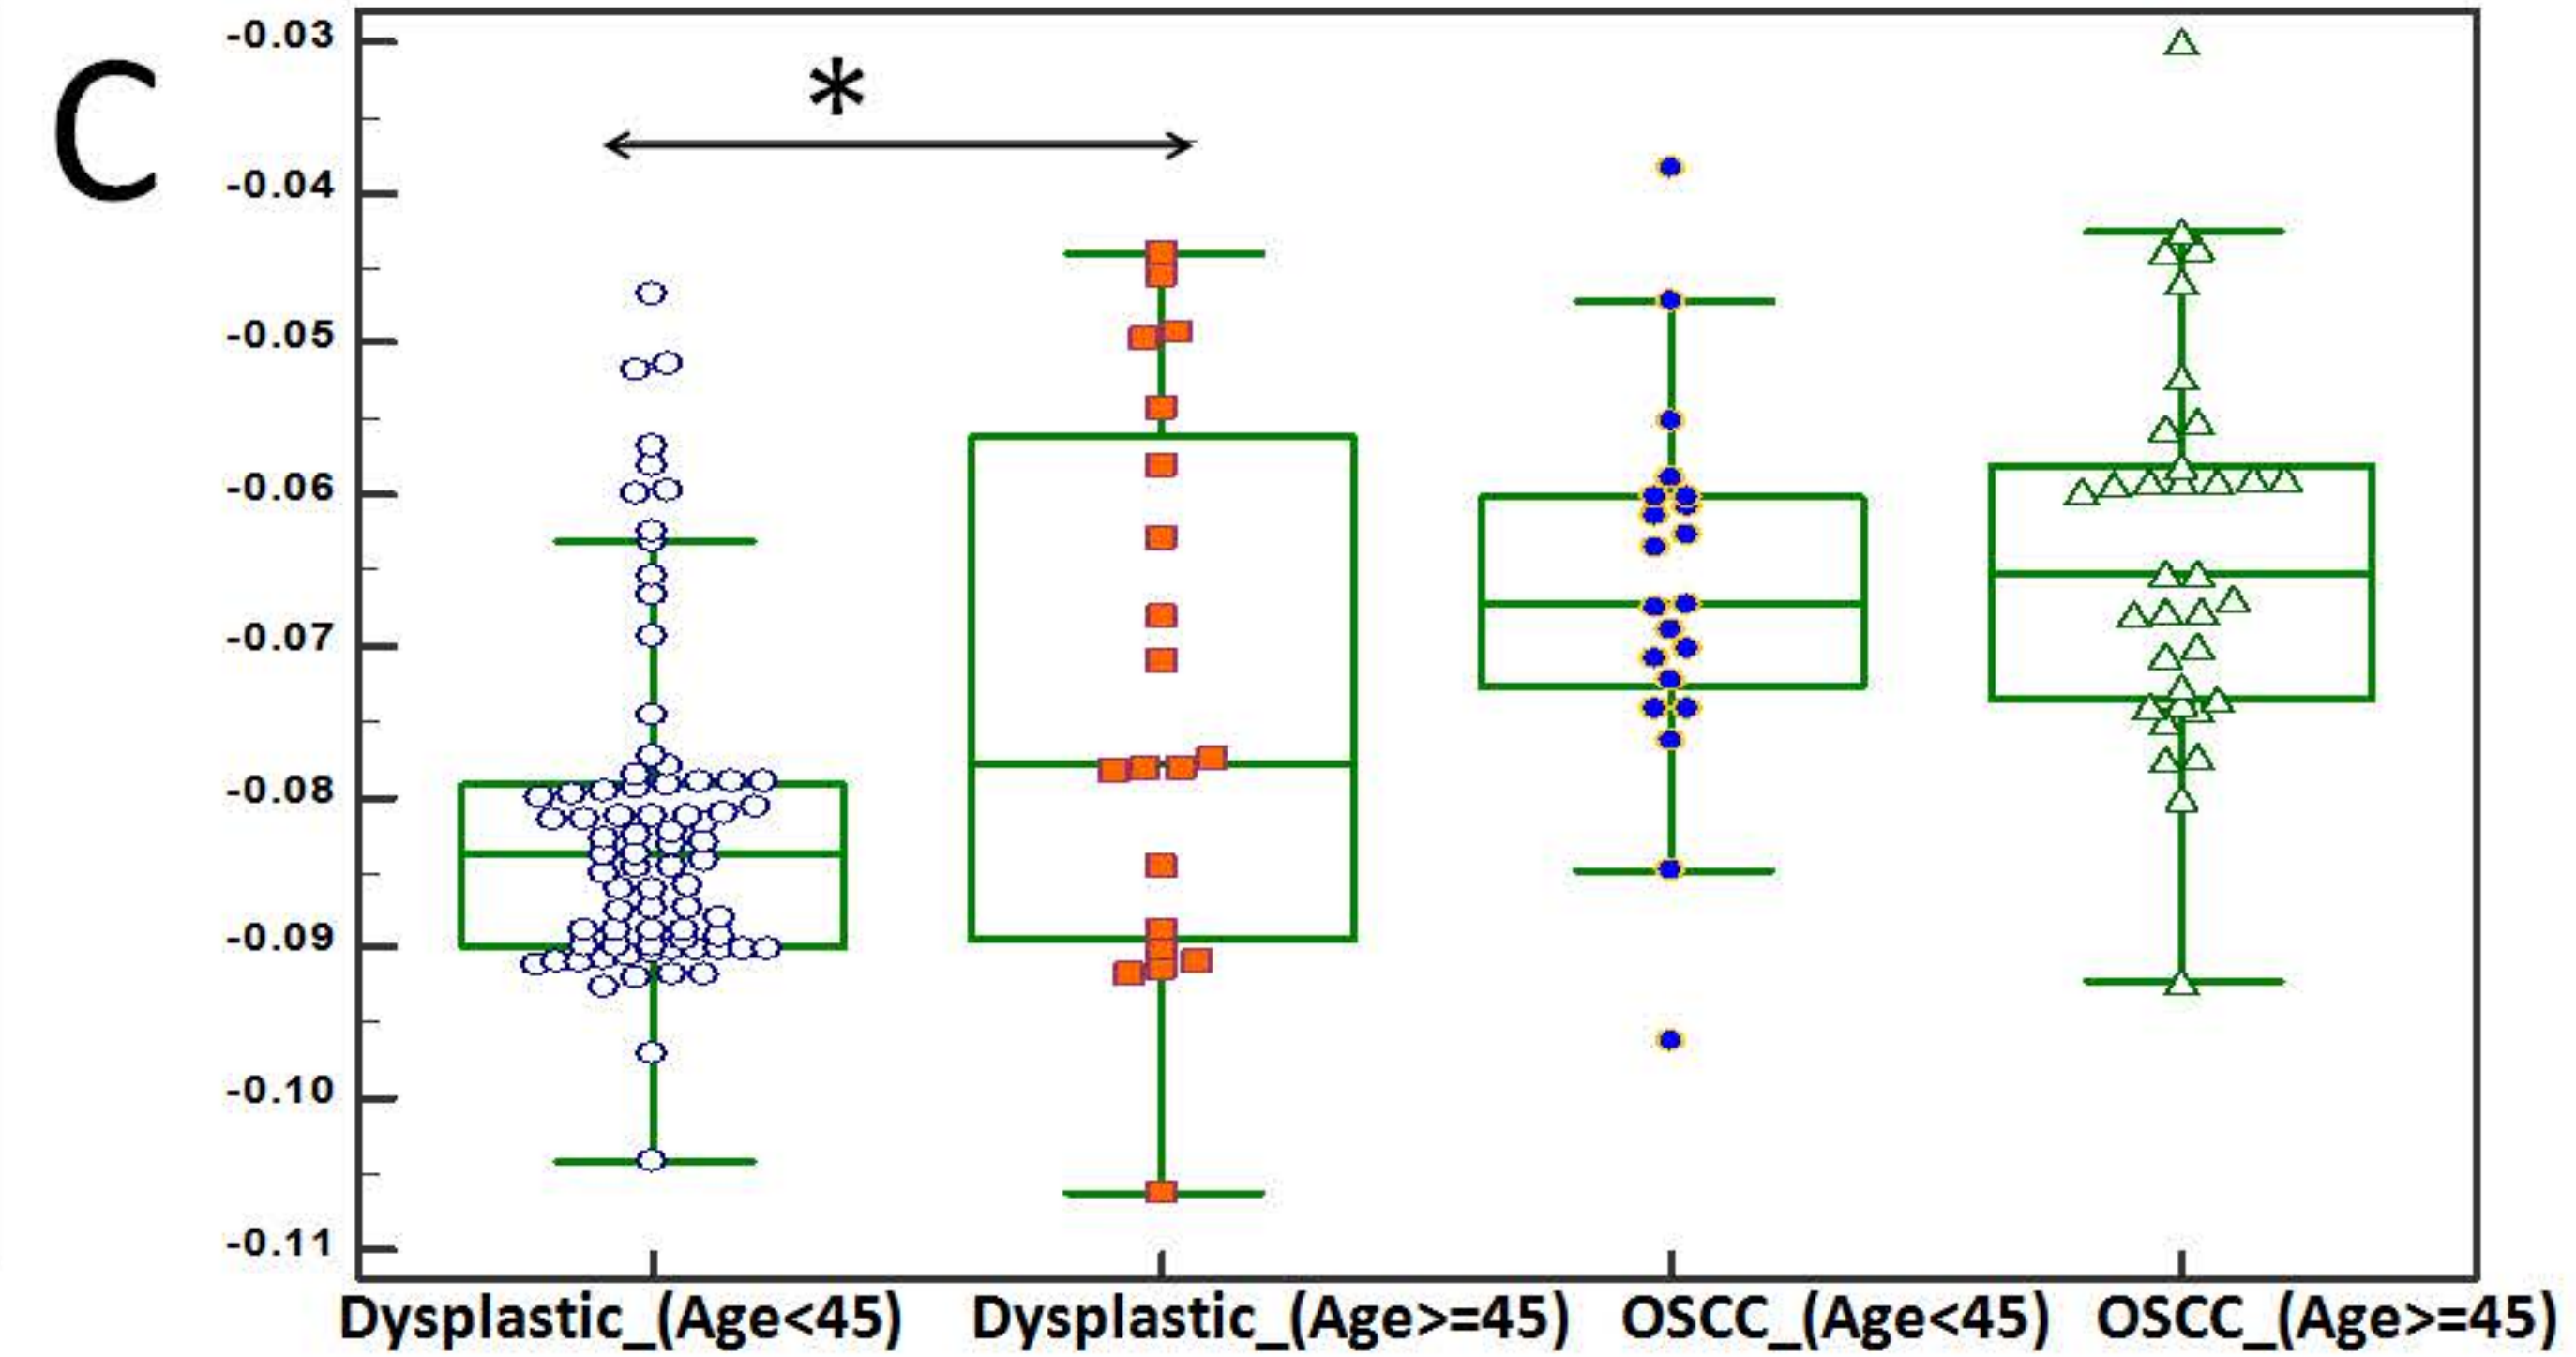

Habit history

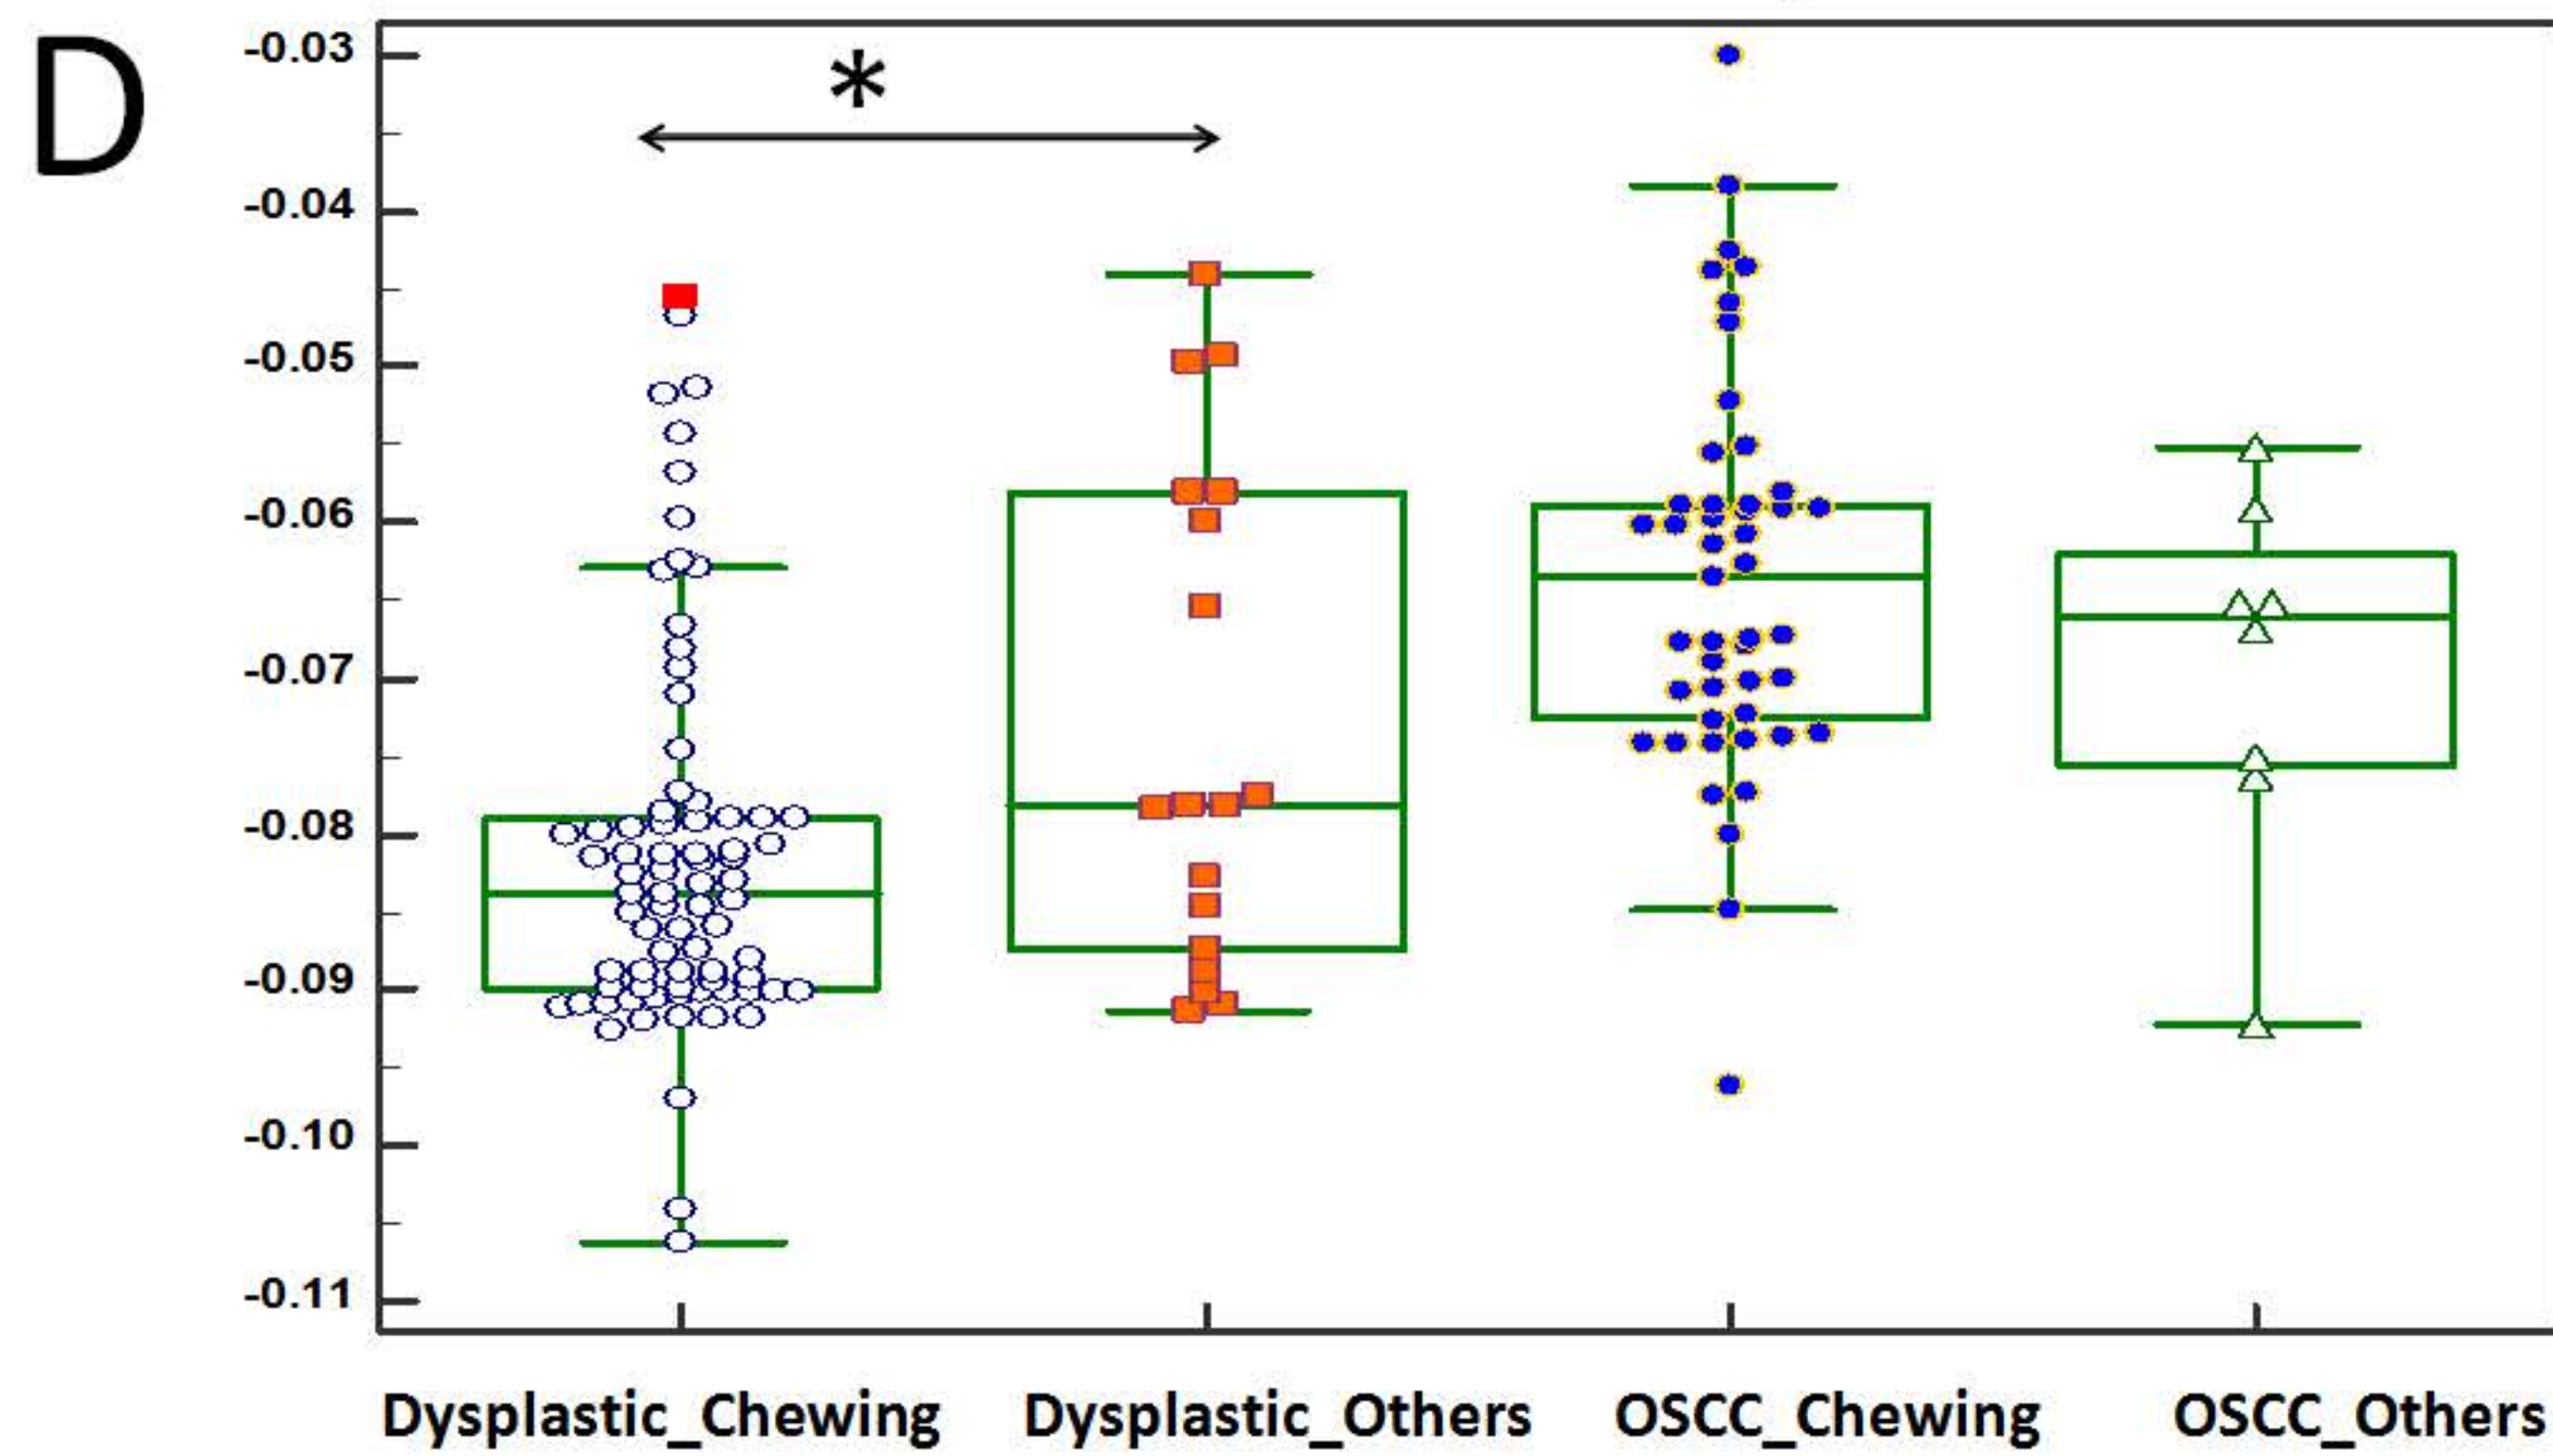

Grades of dysplasia

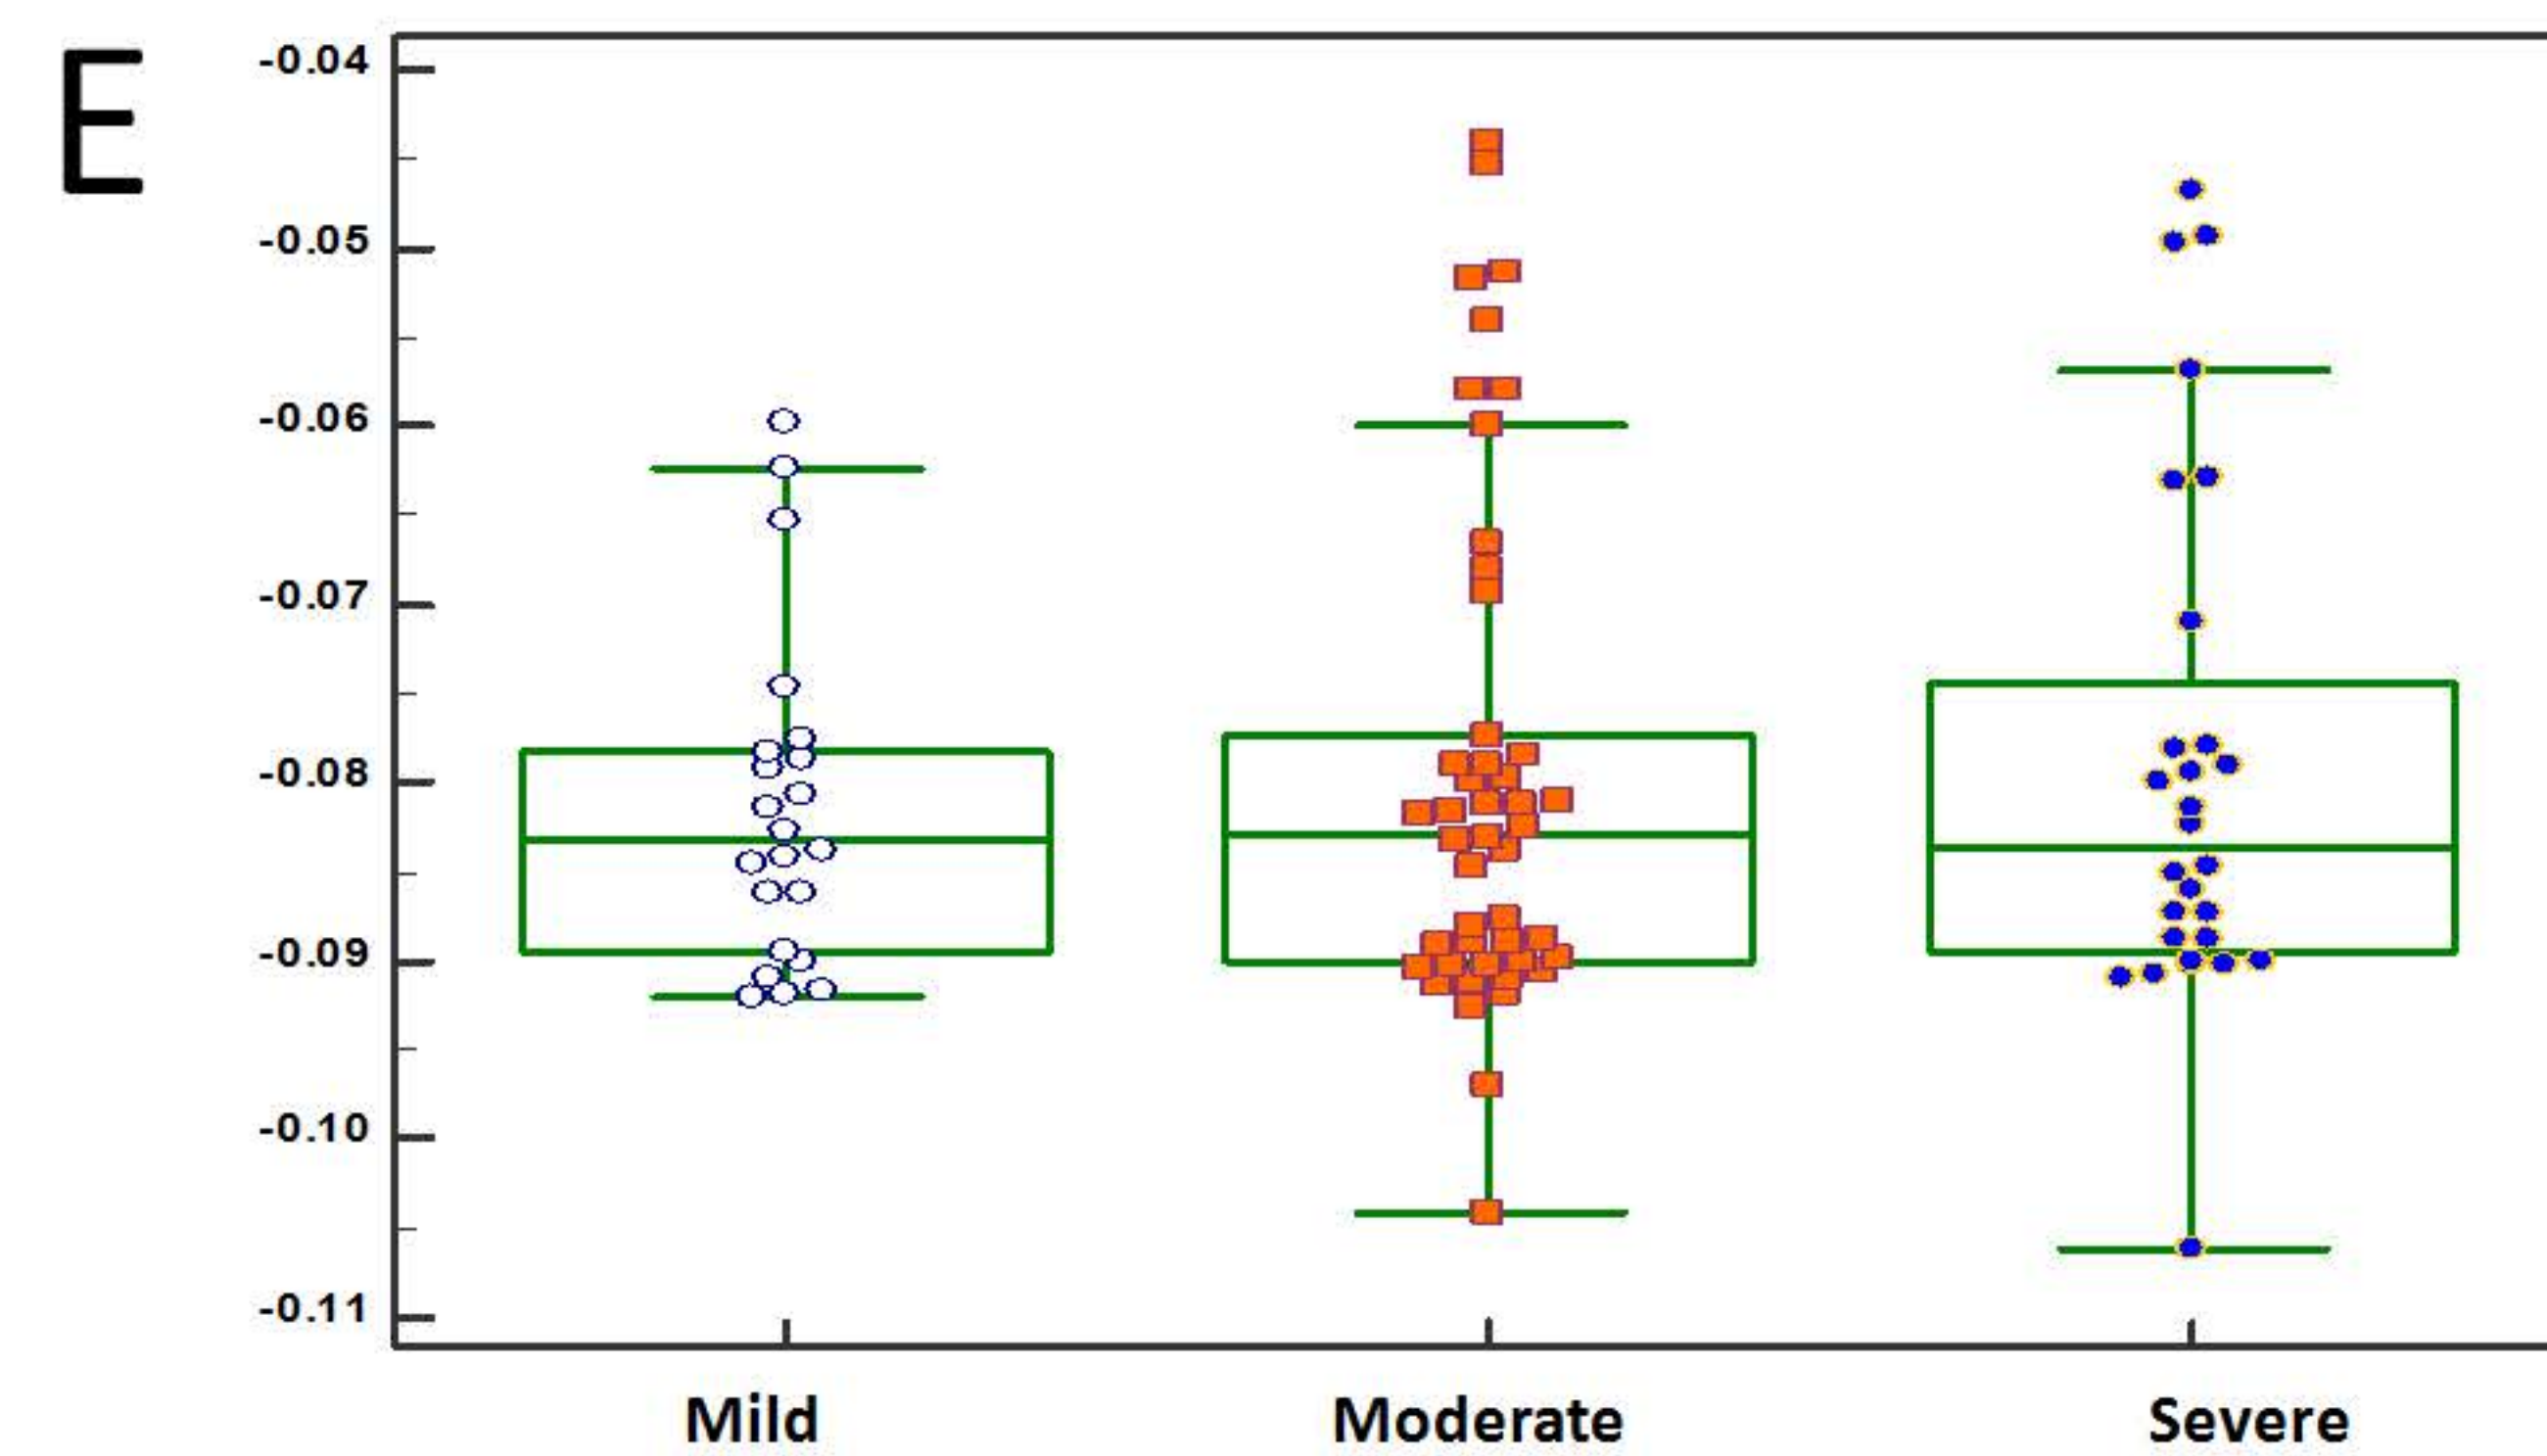

HGD Vs LGD

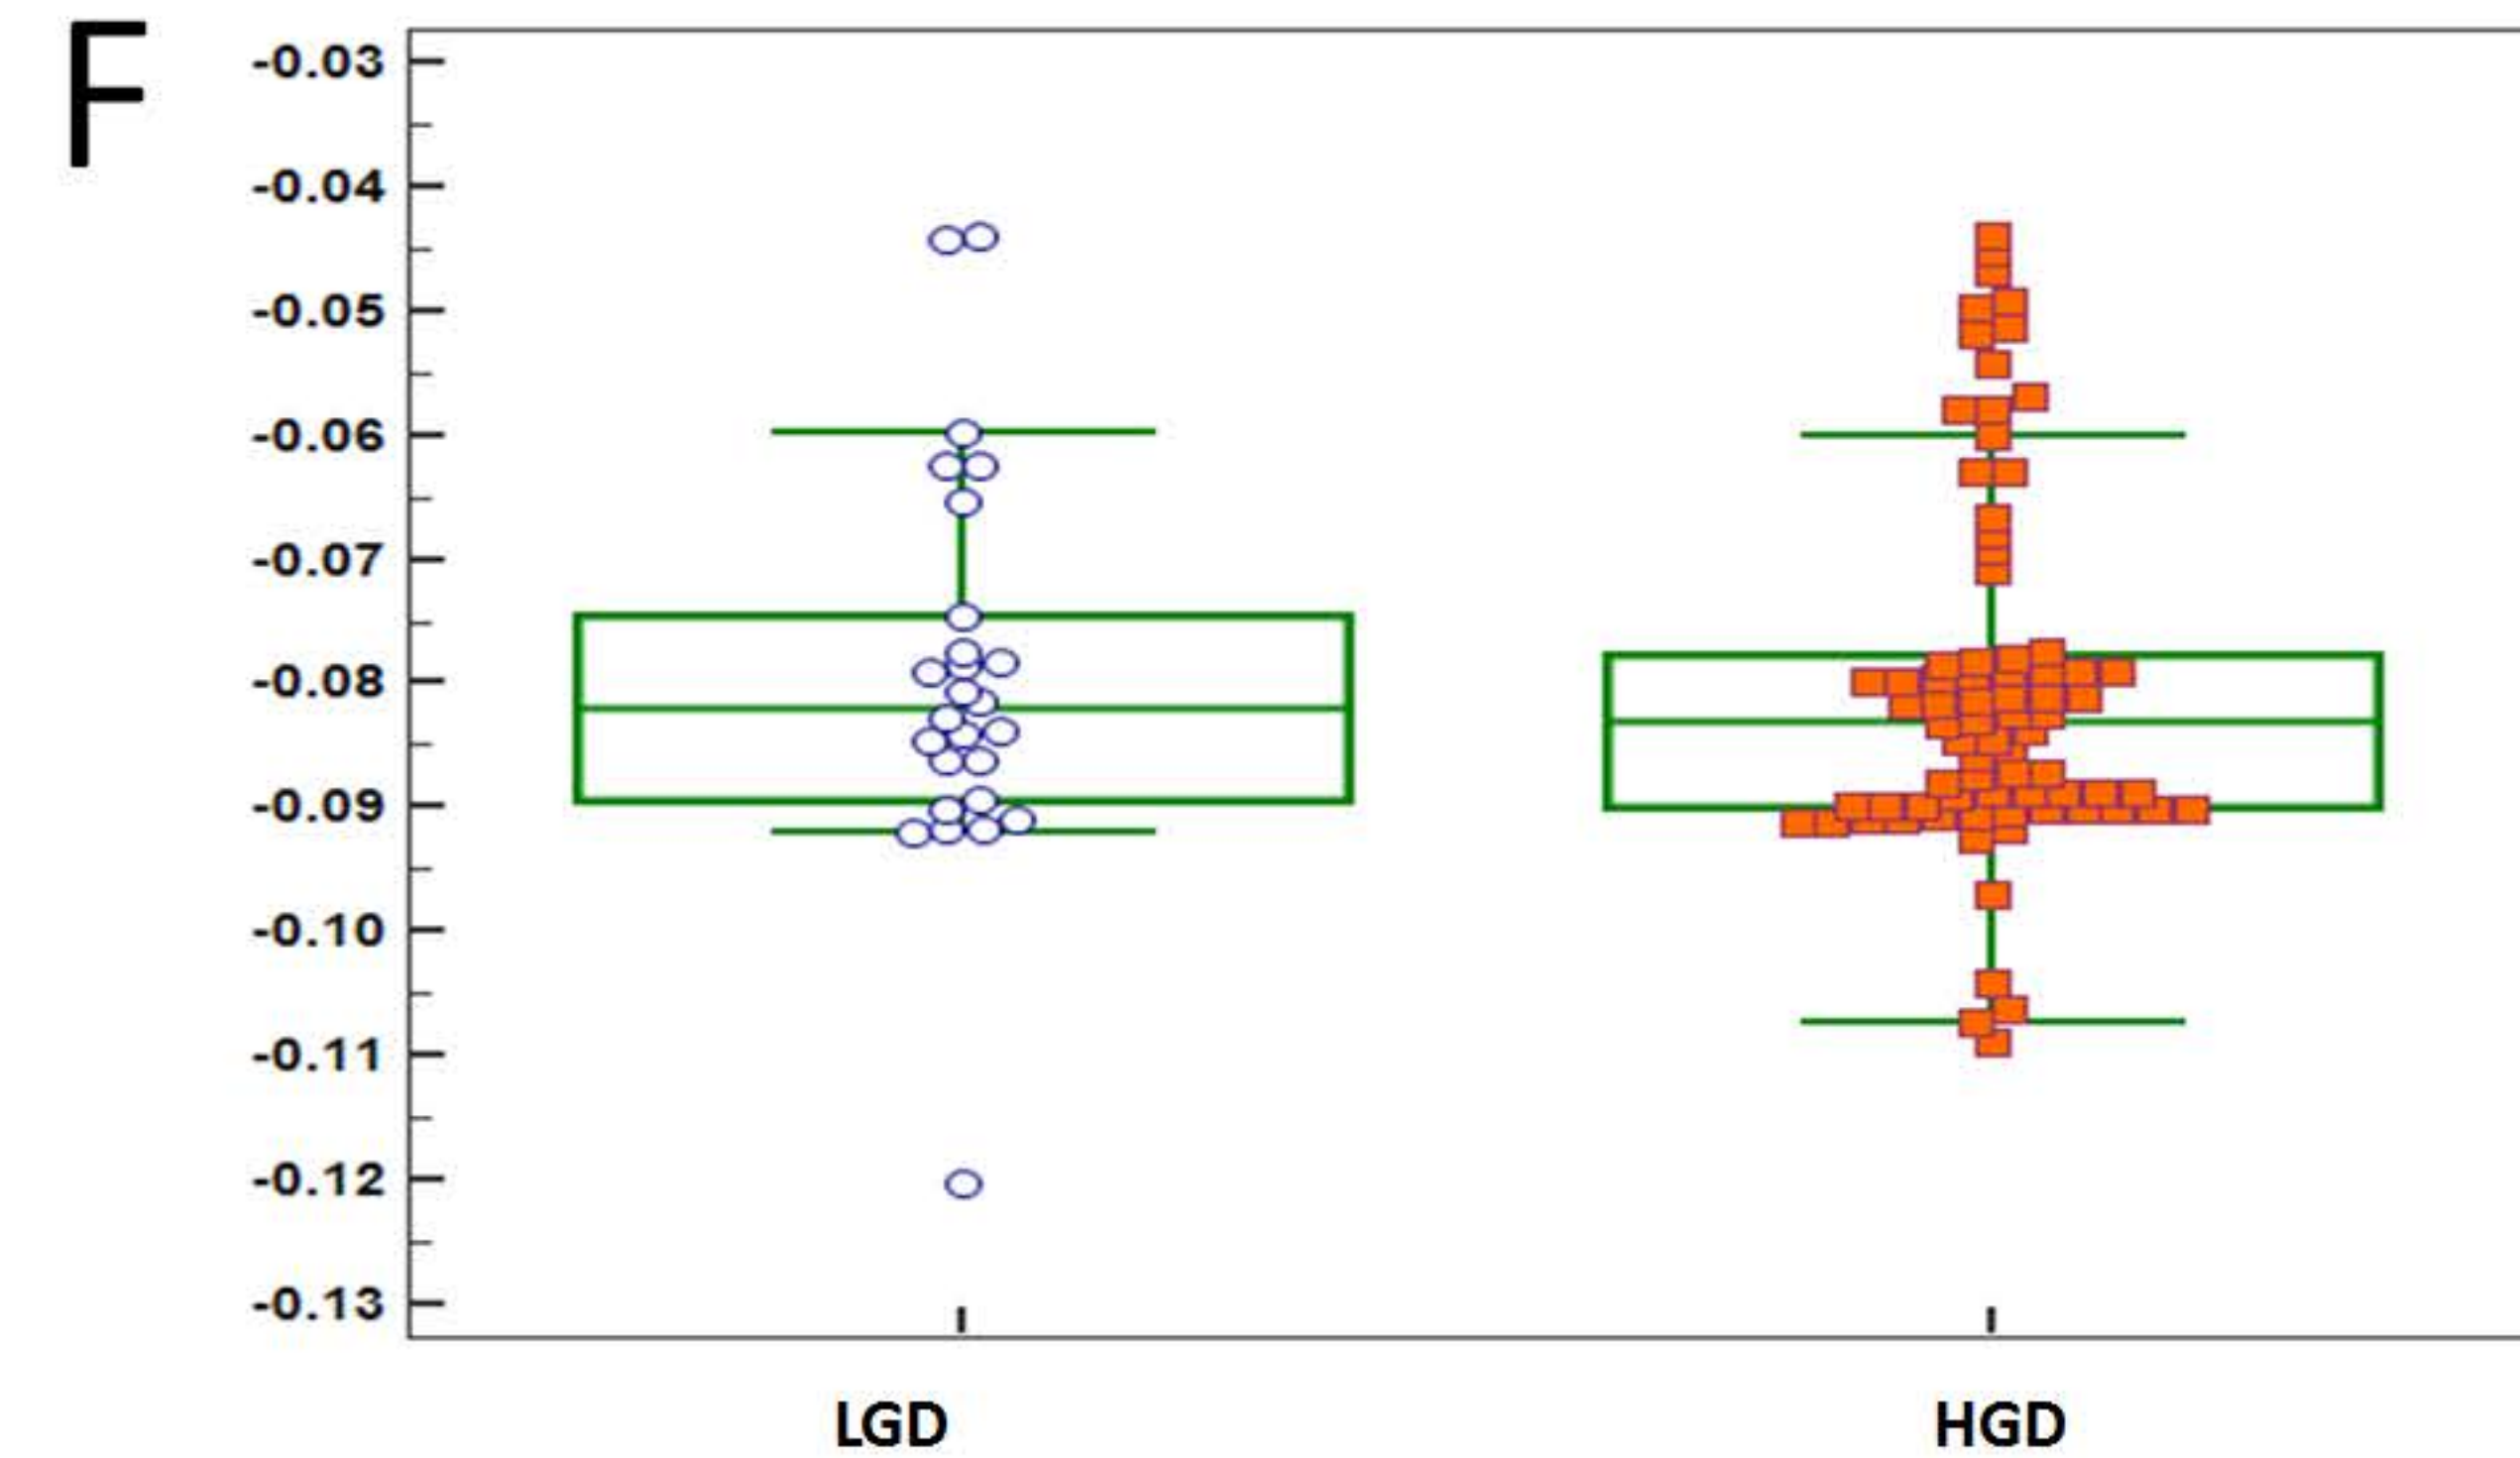

Supplement: s1 [file s1]

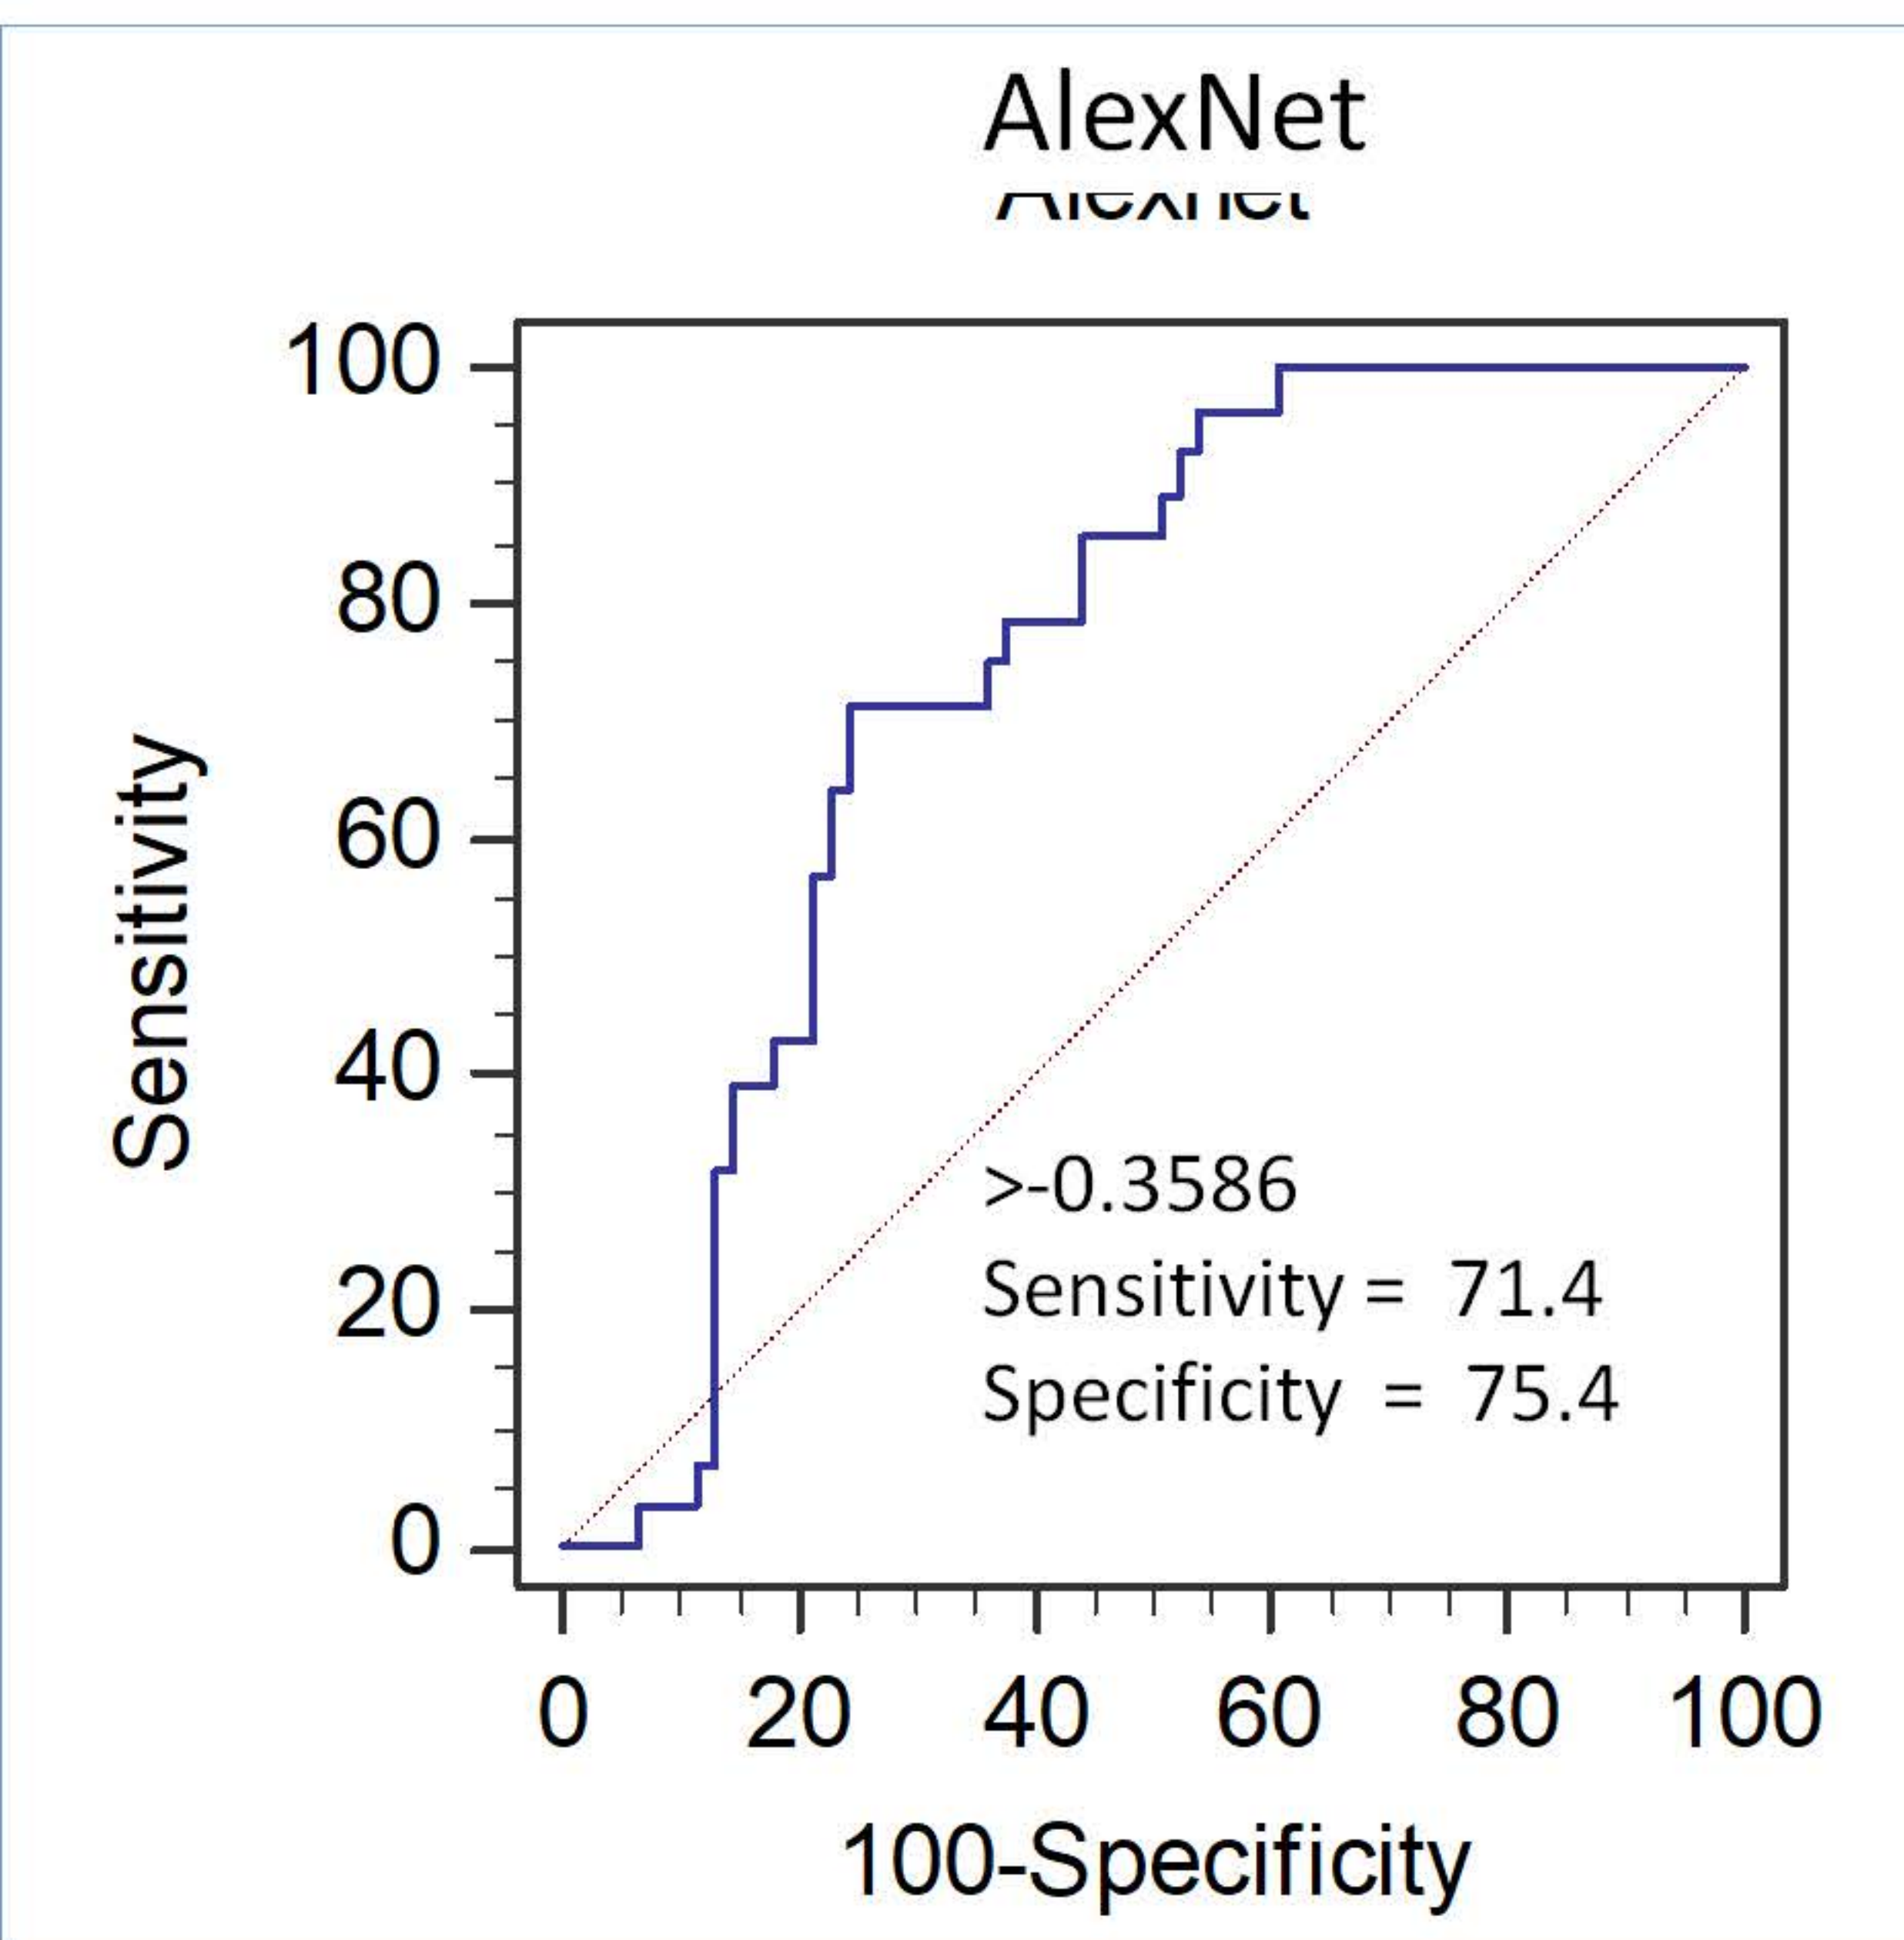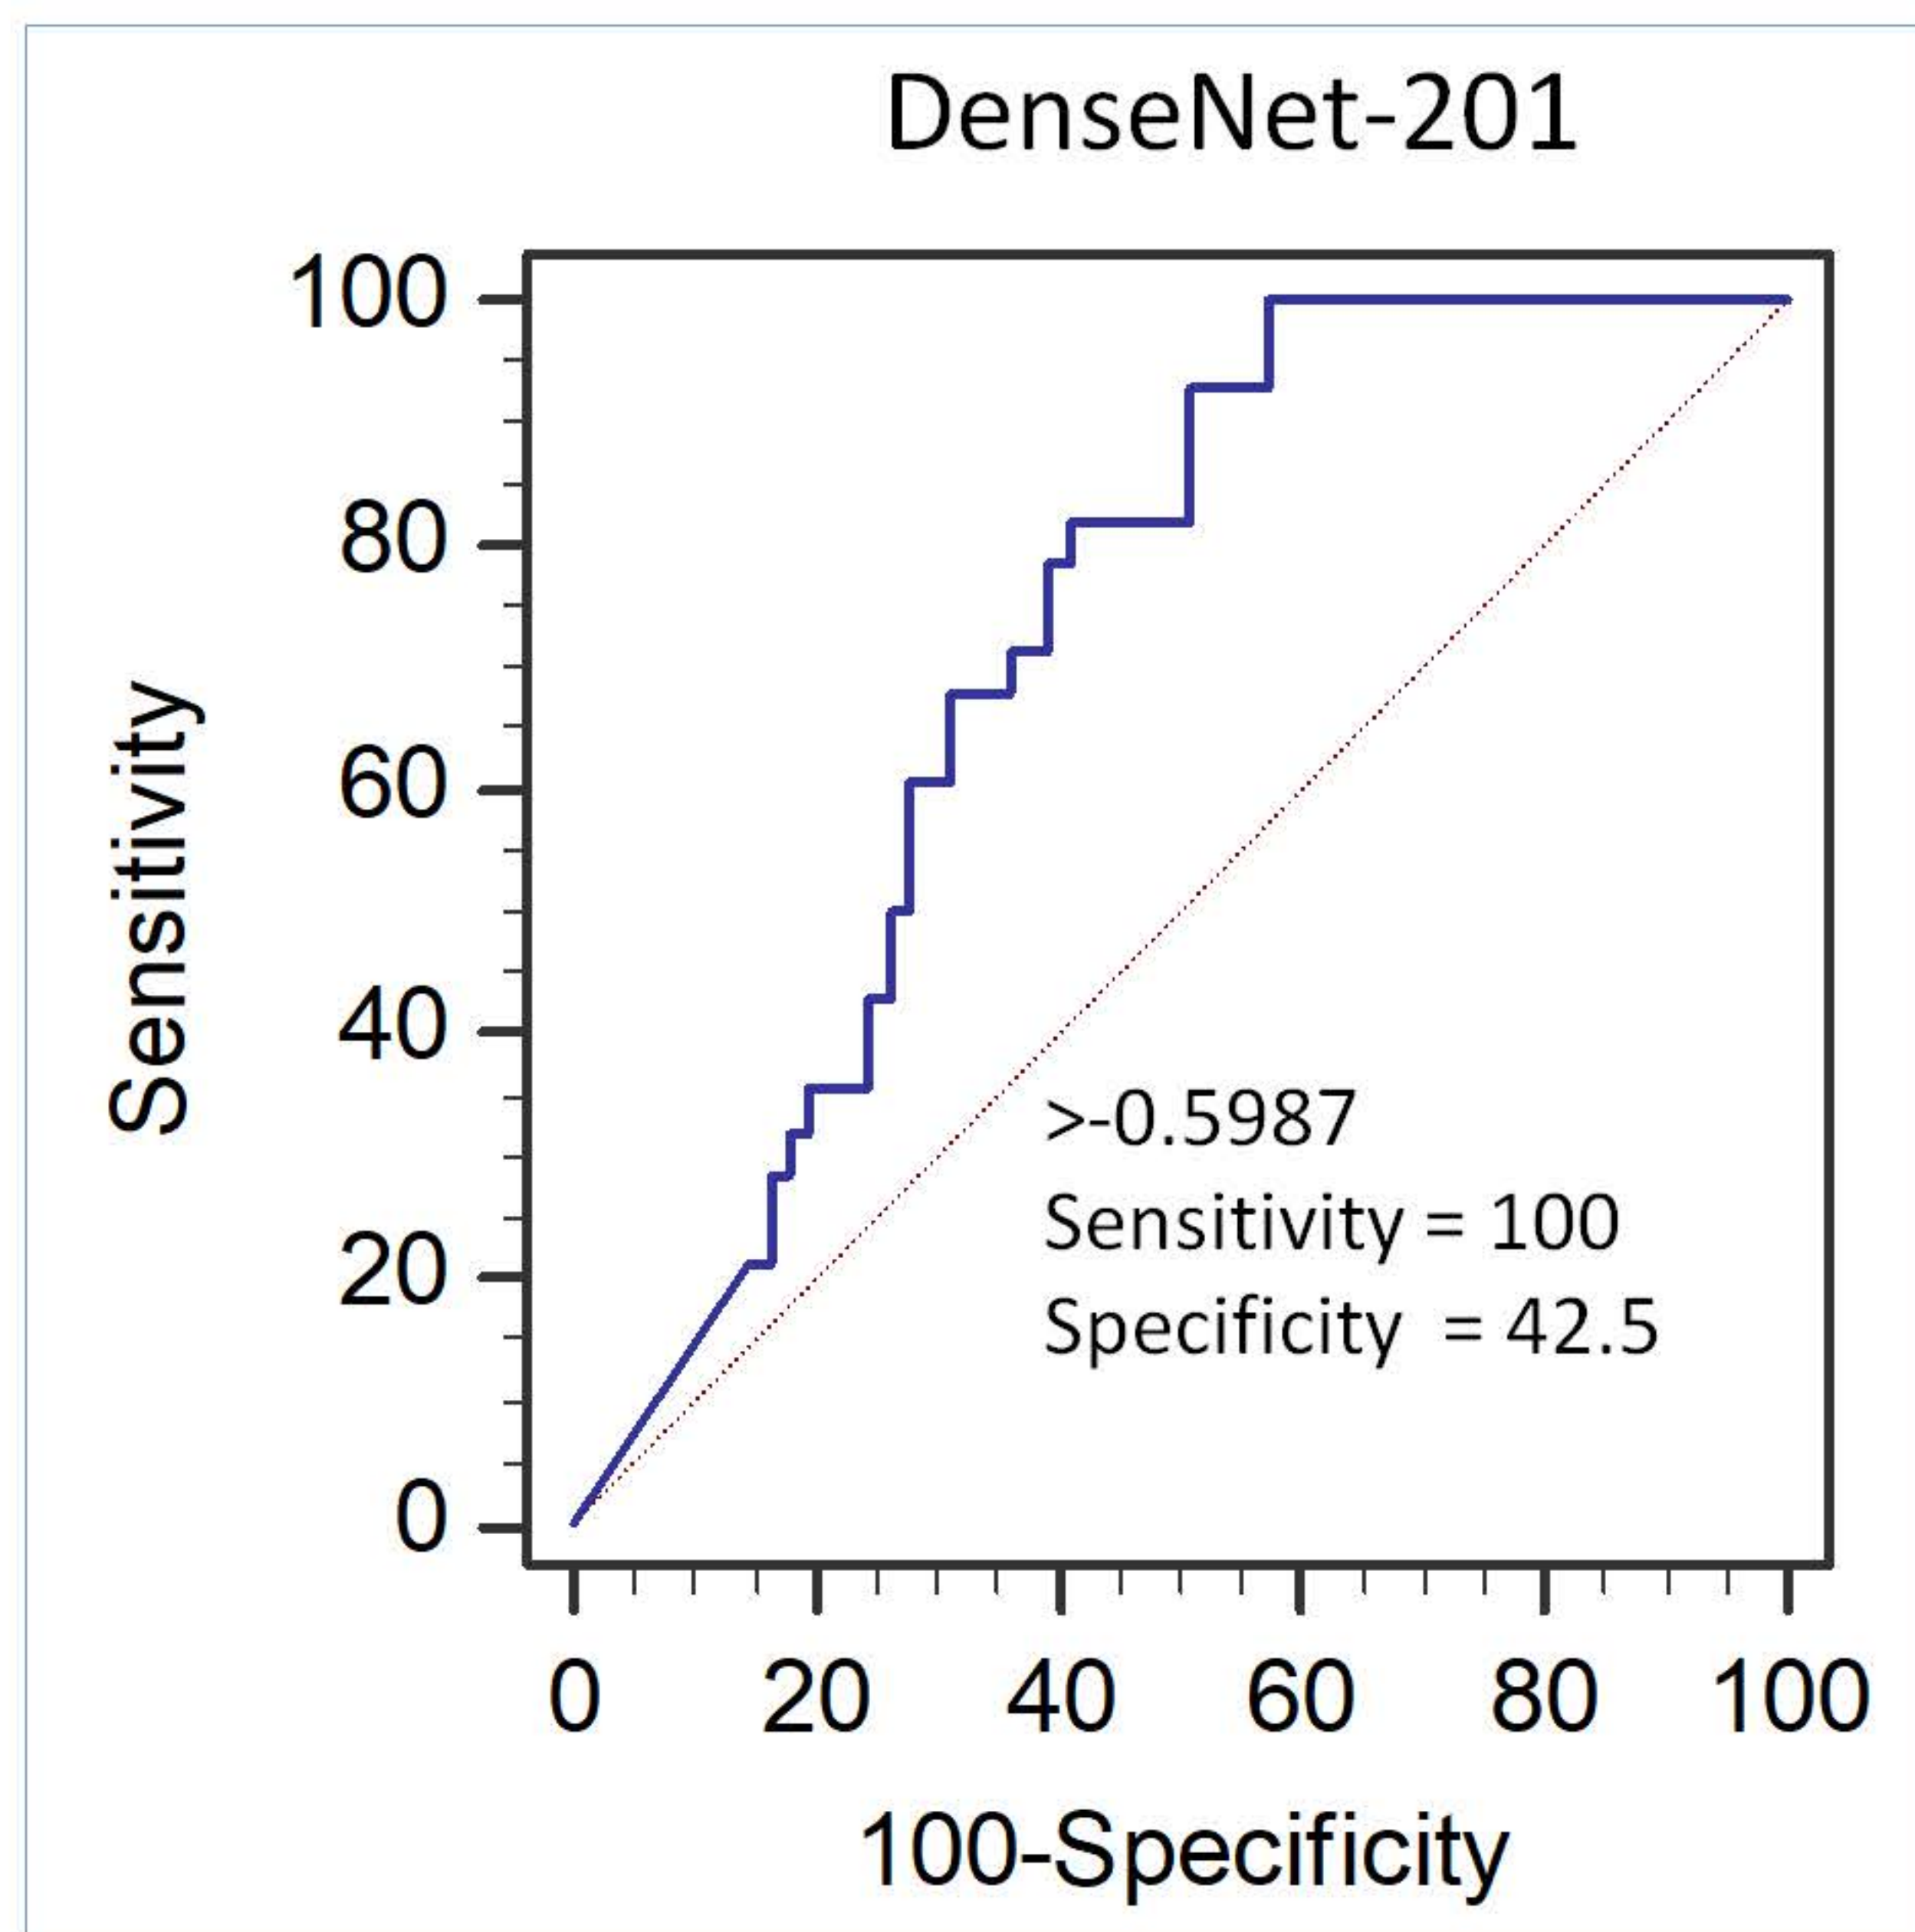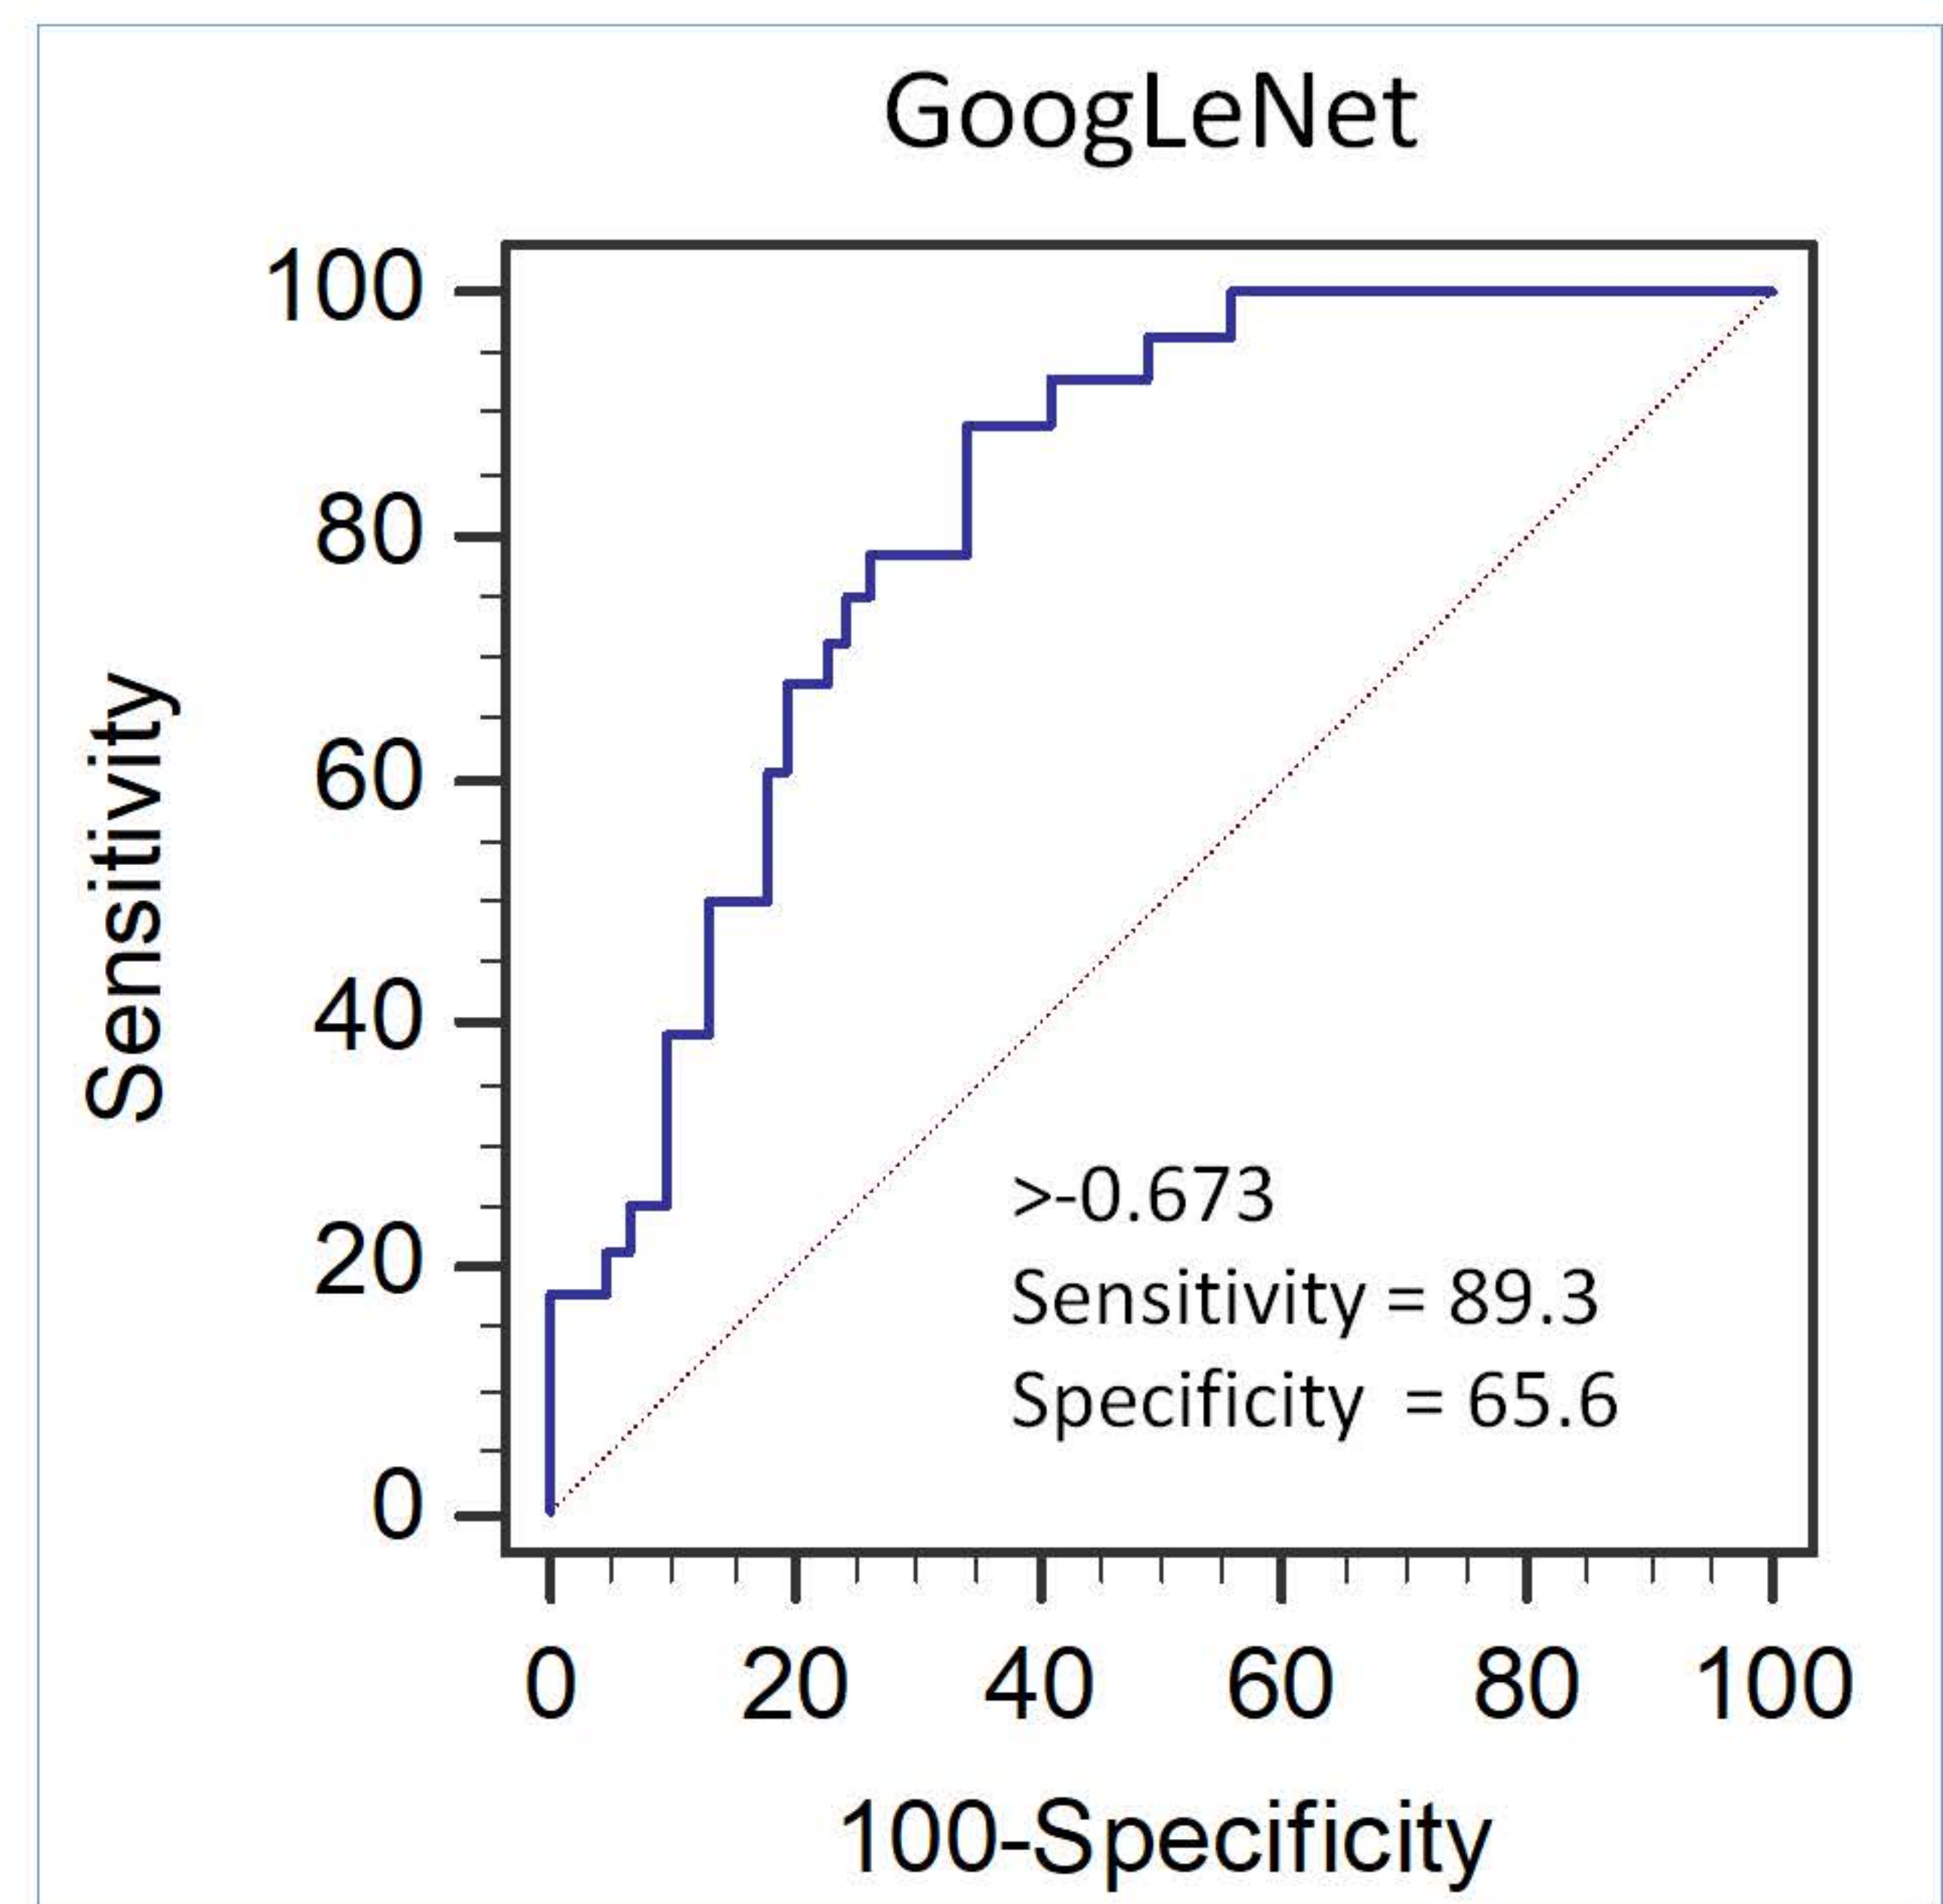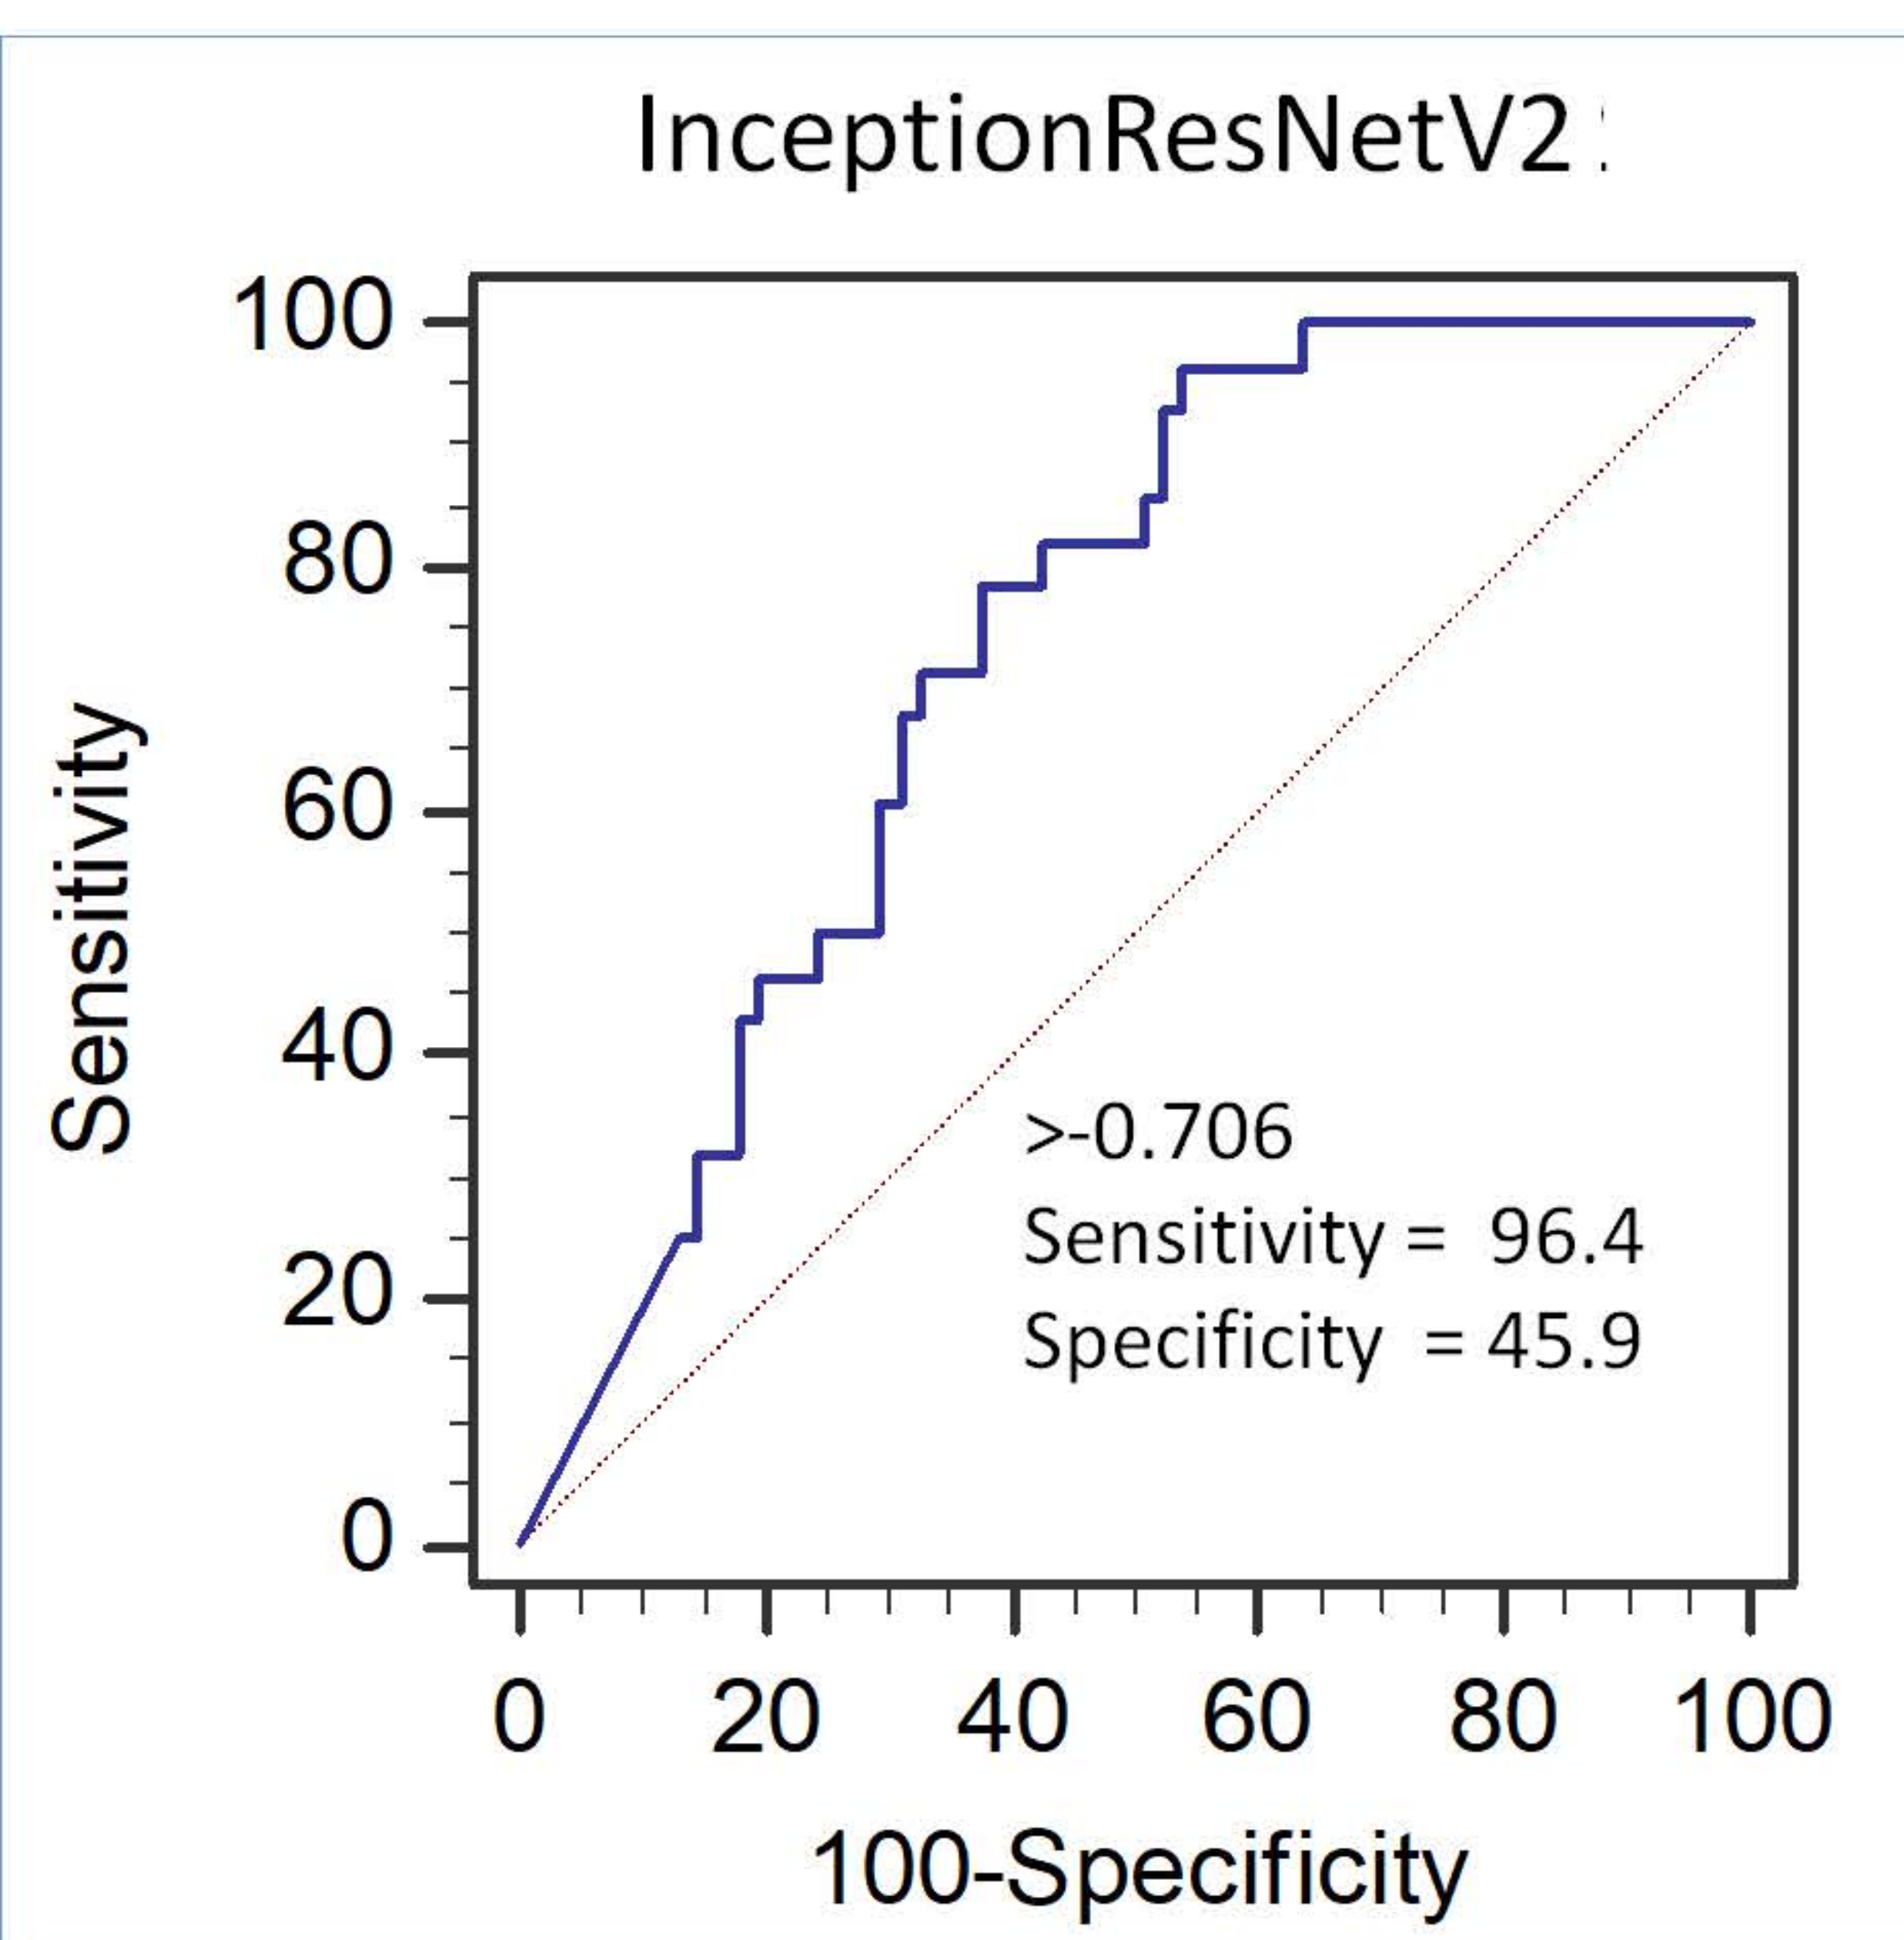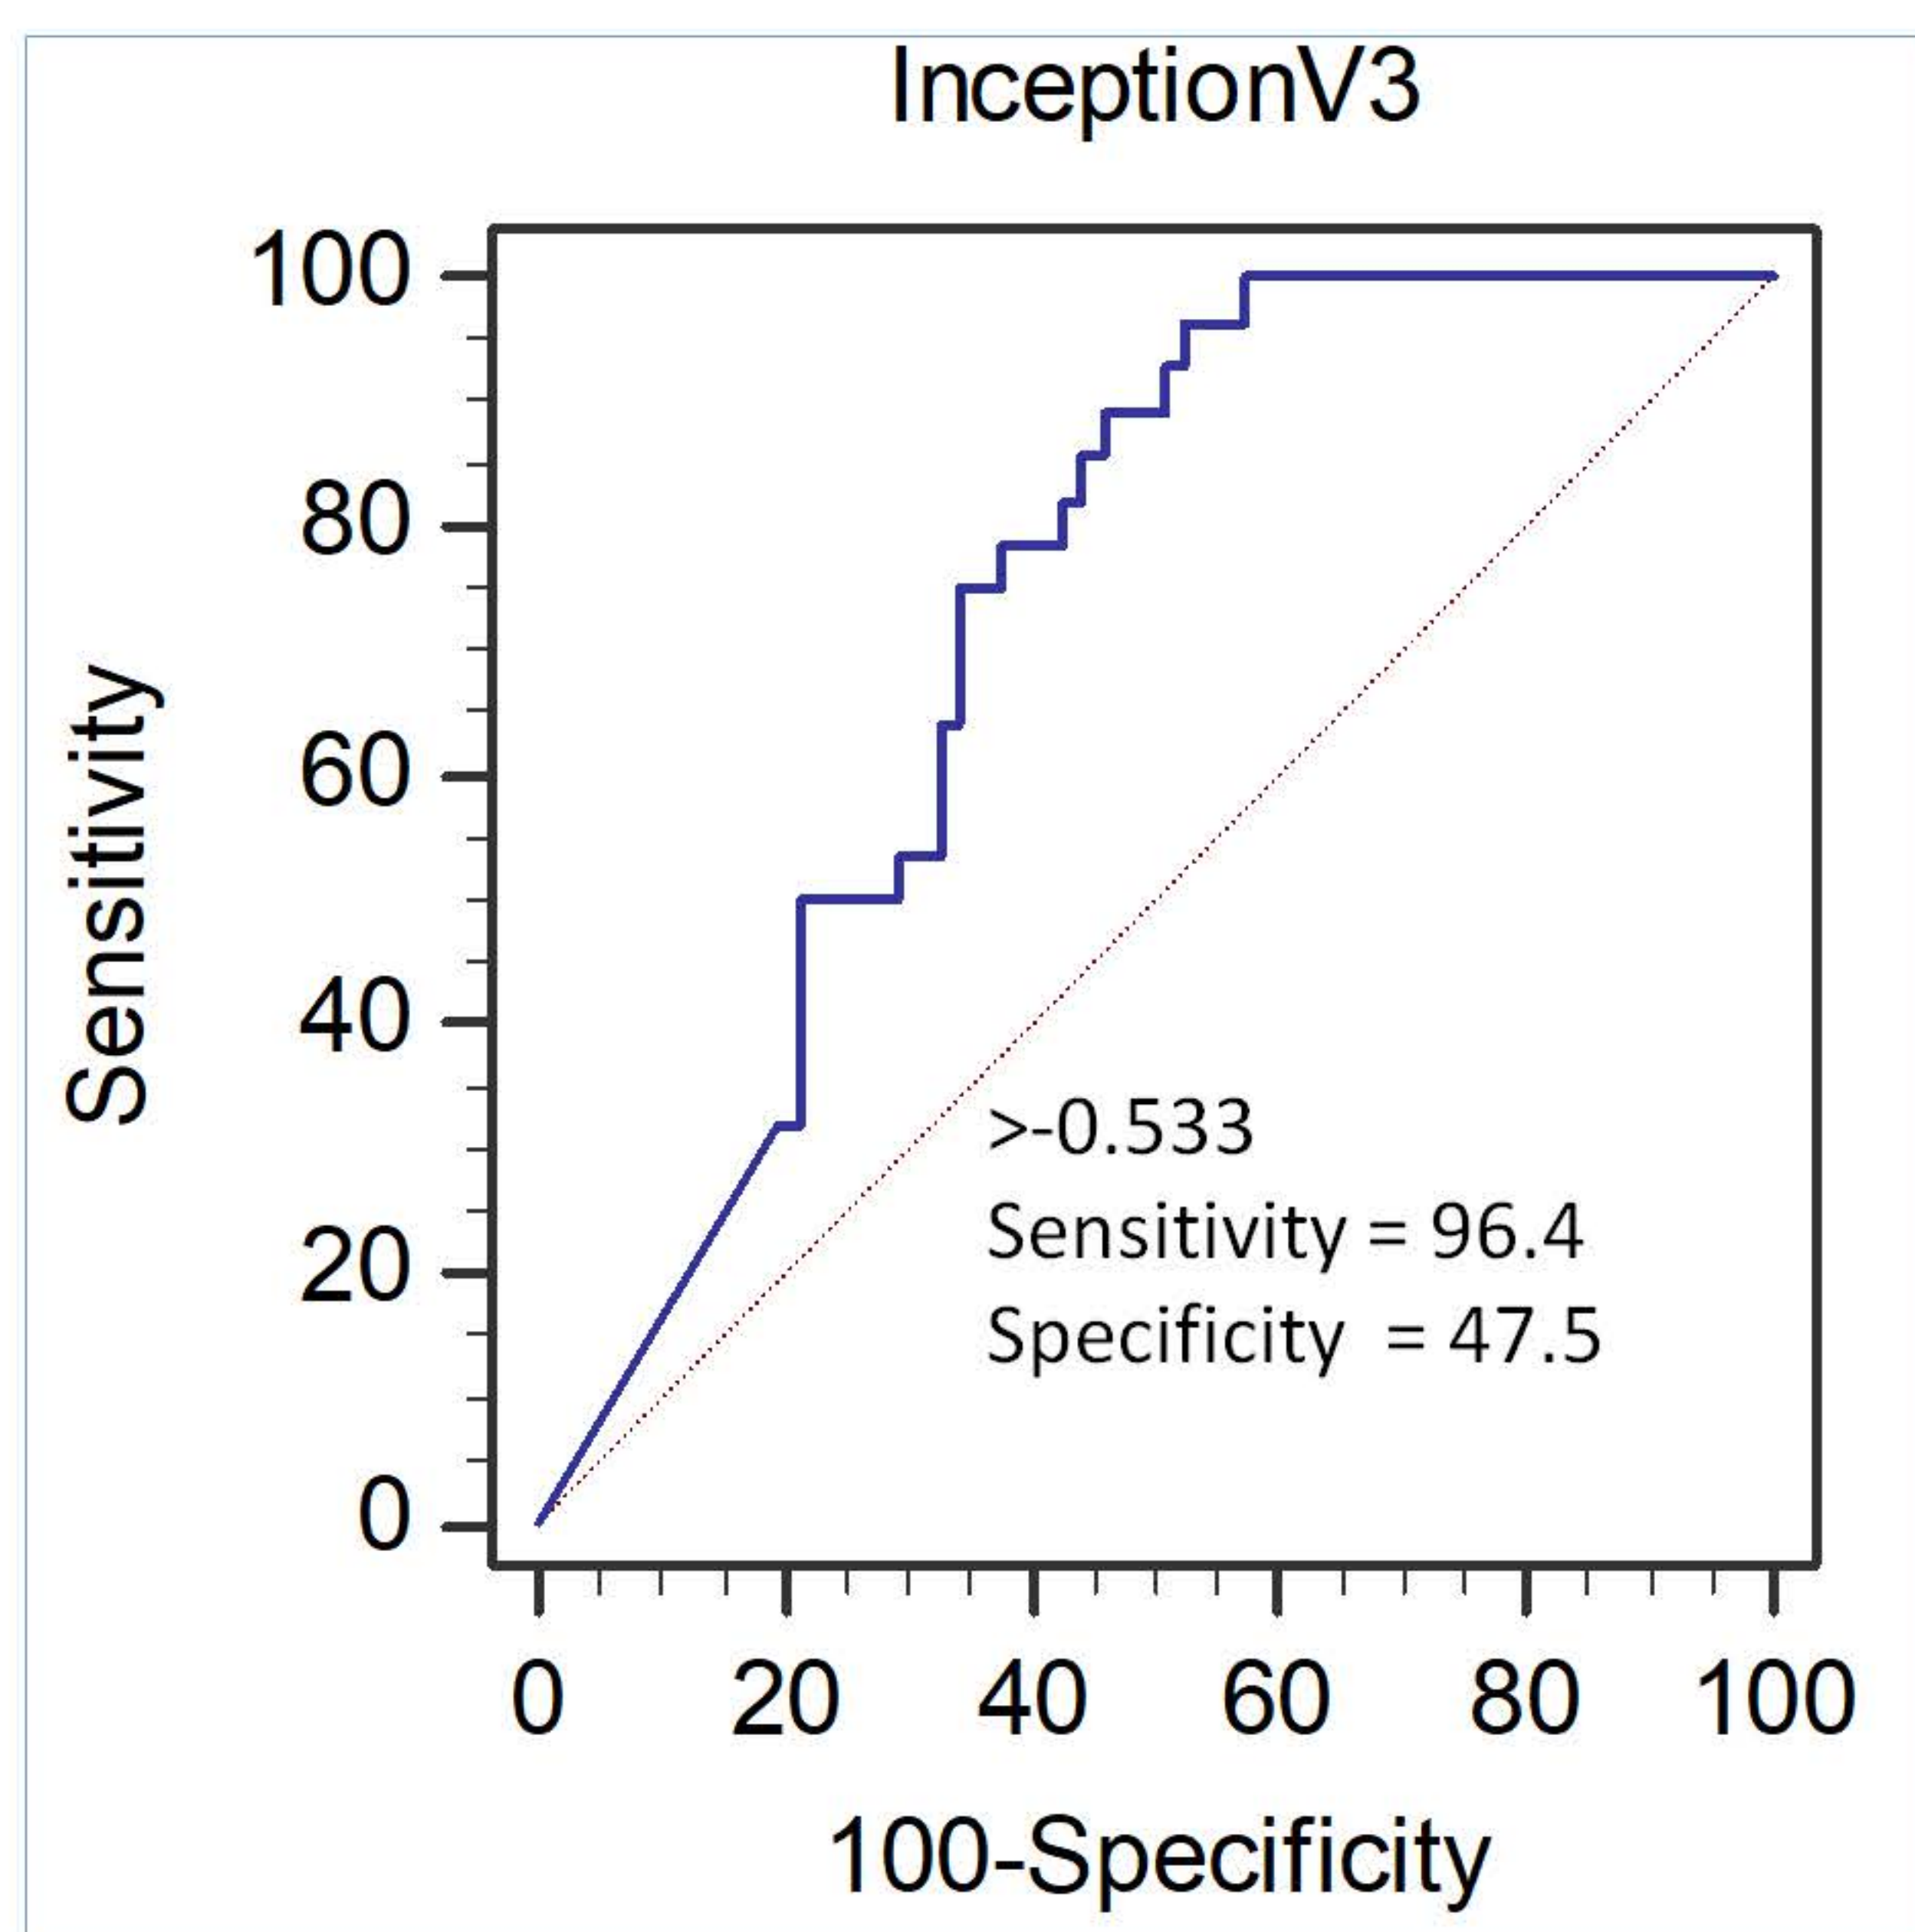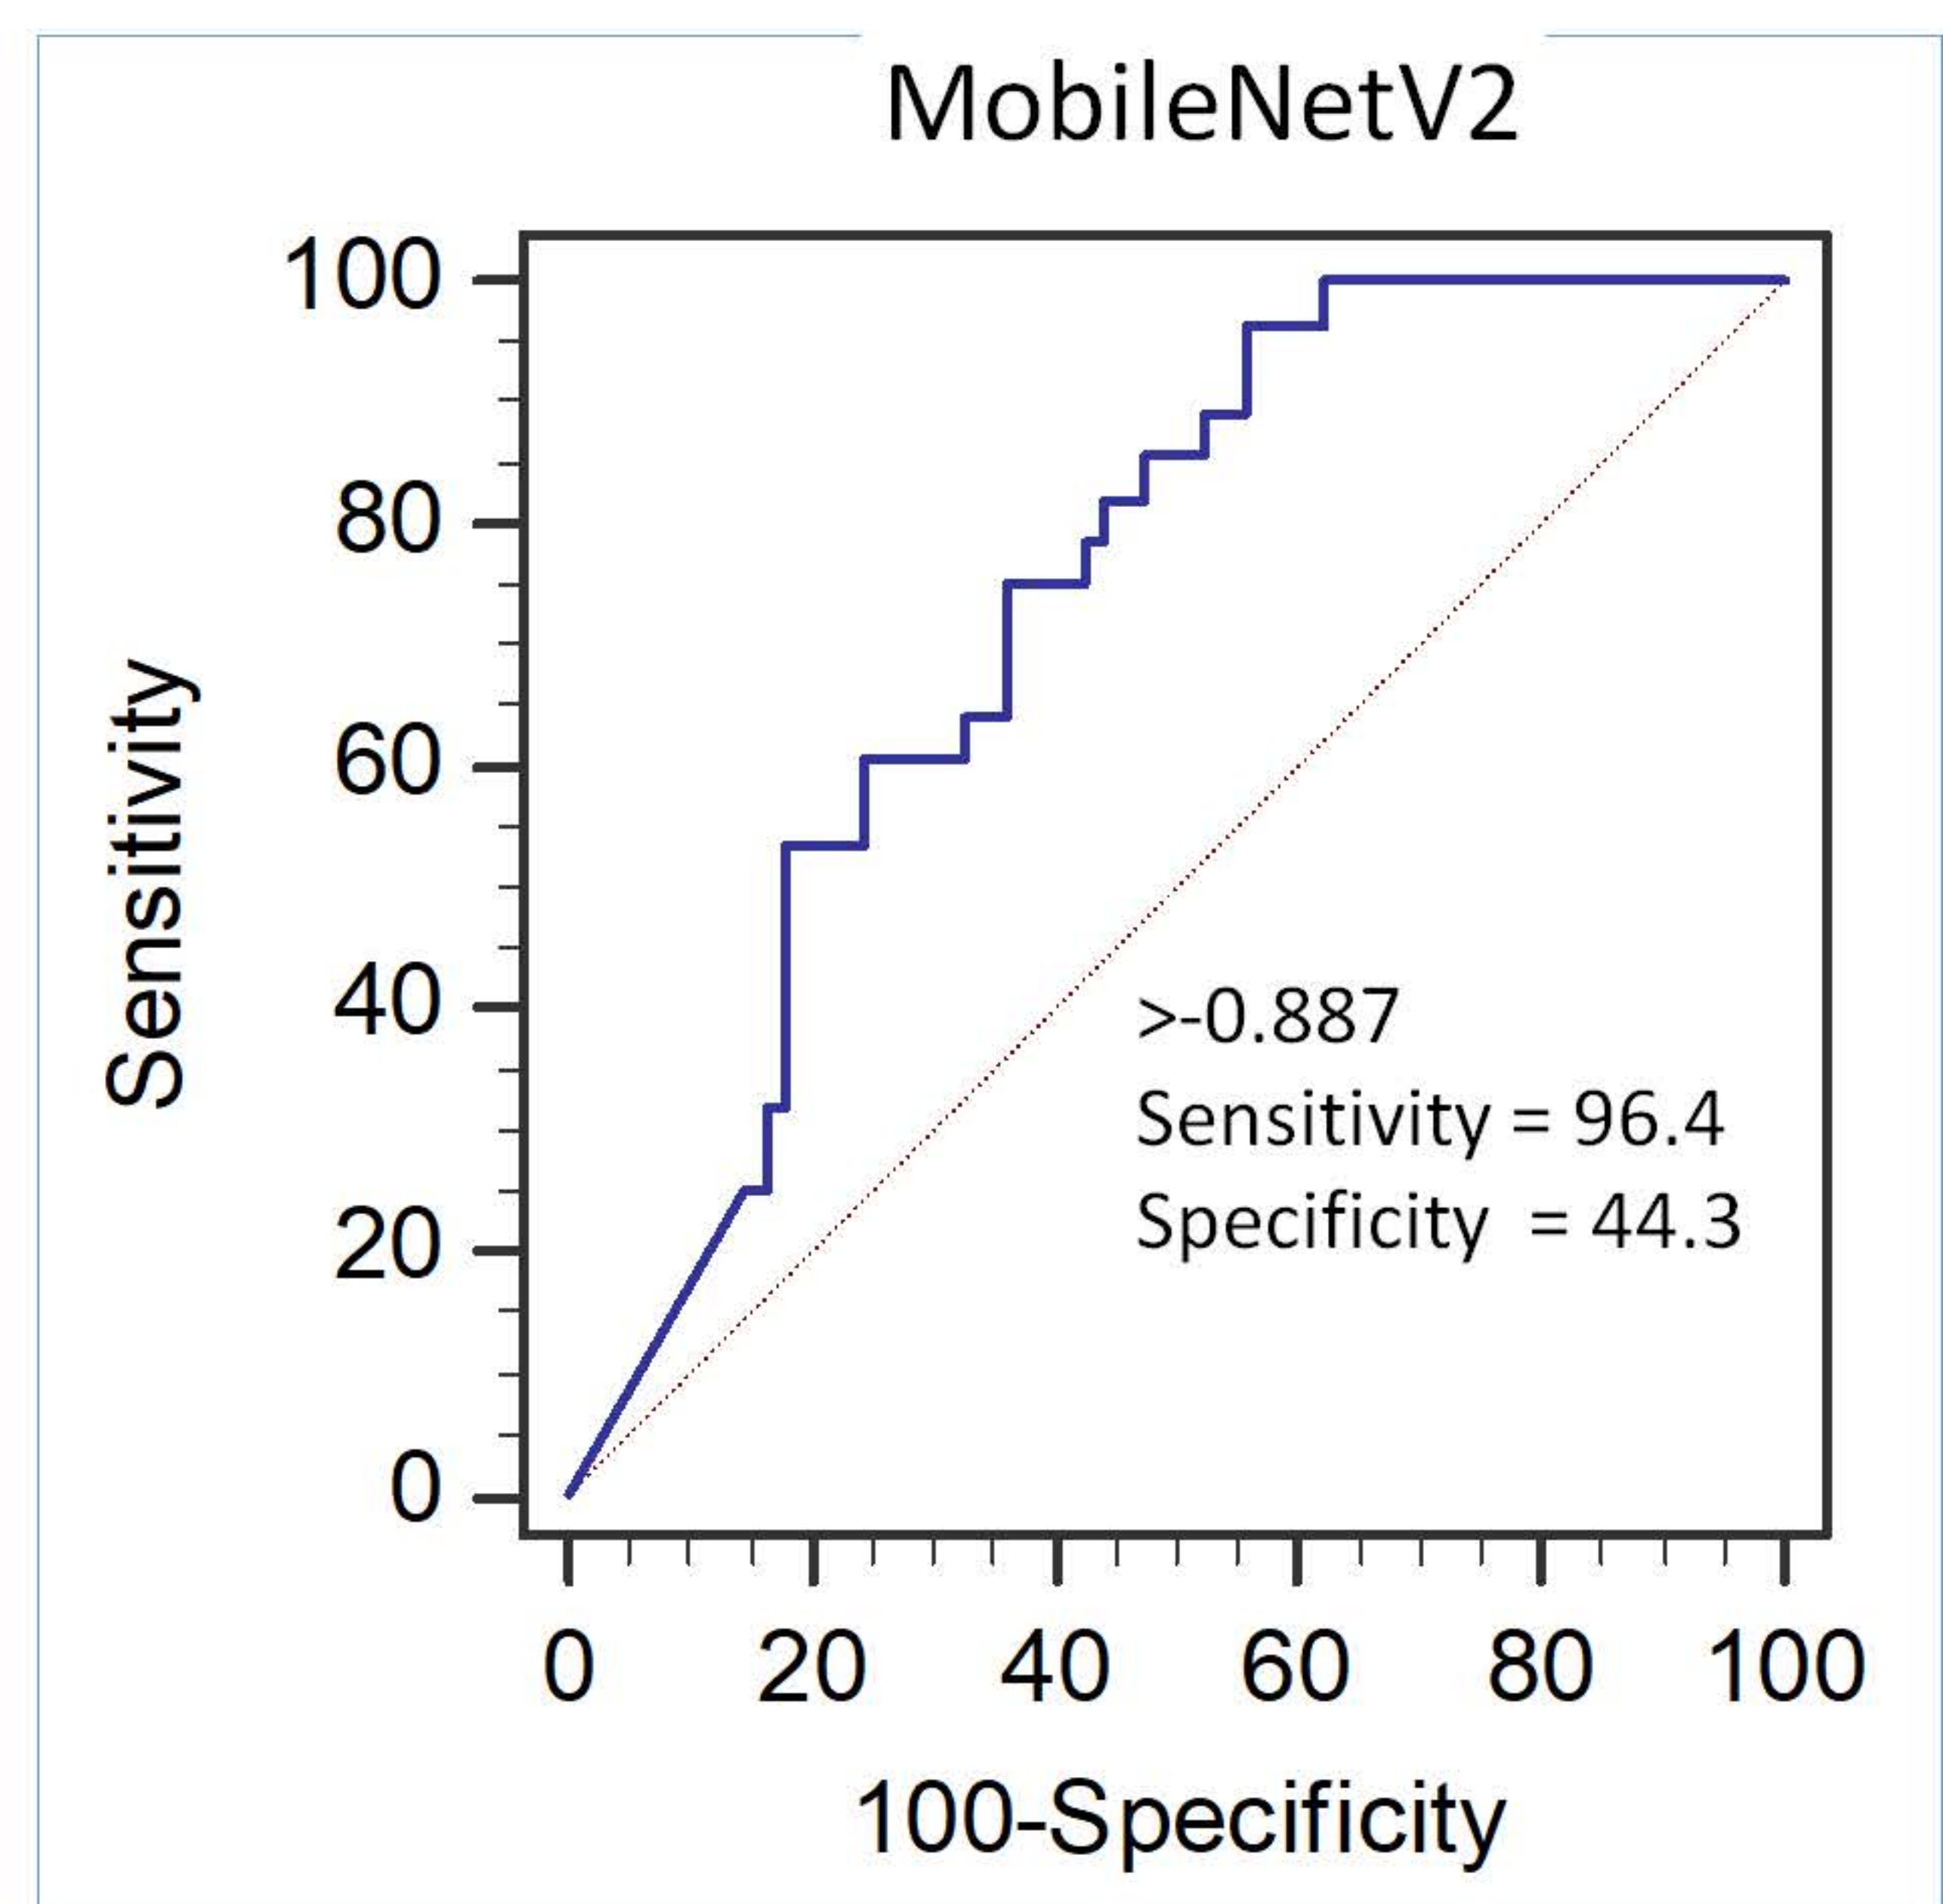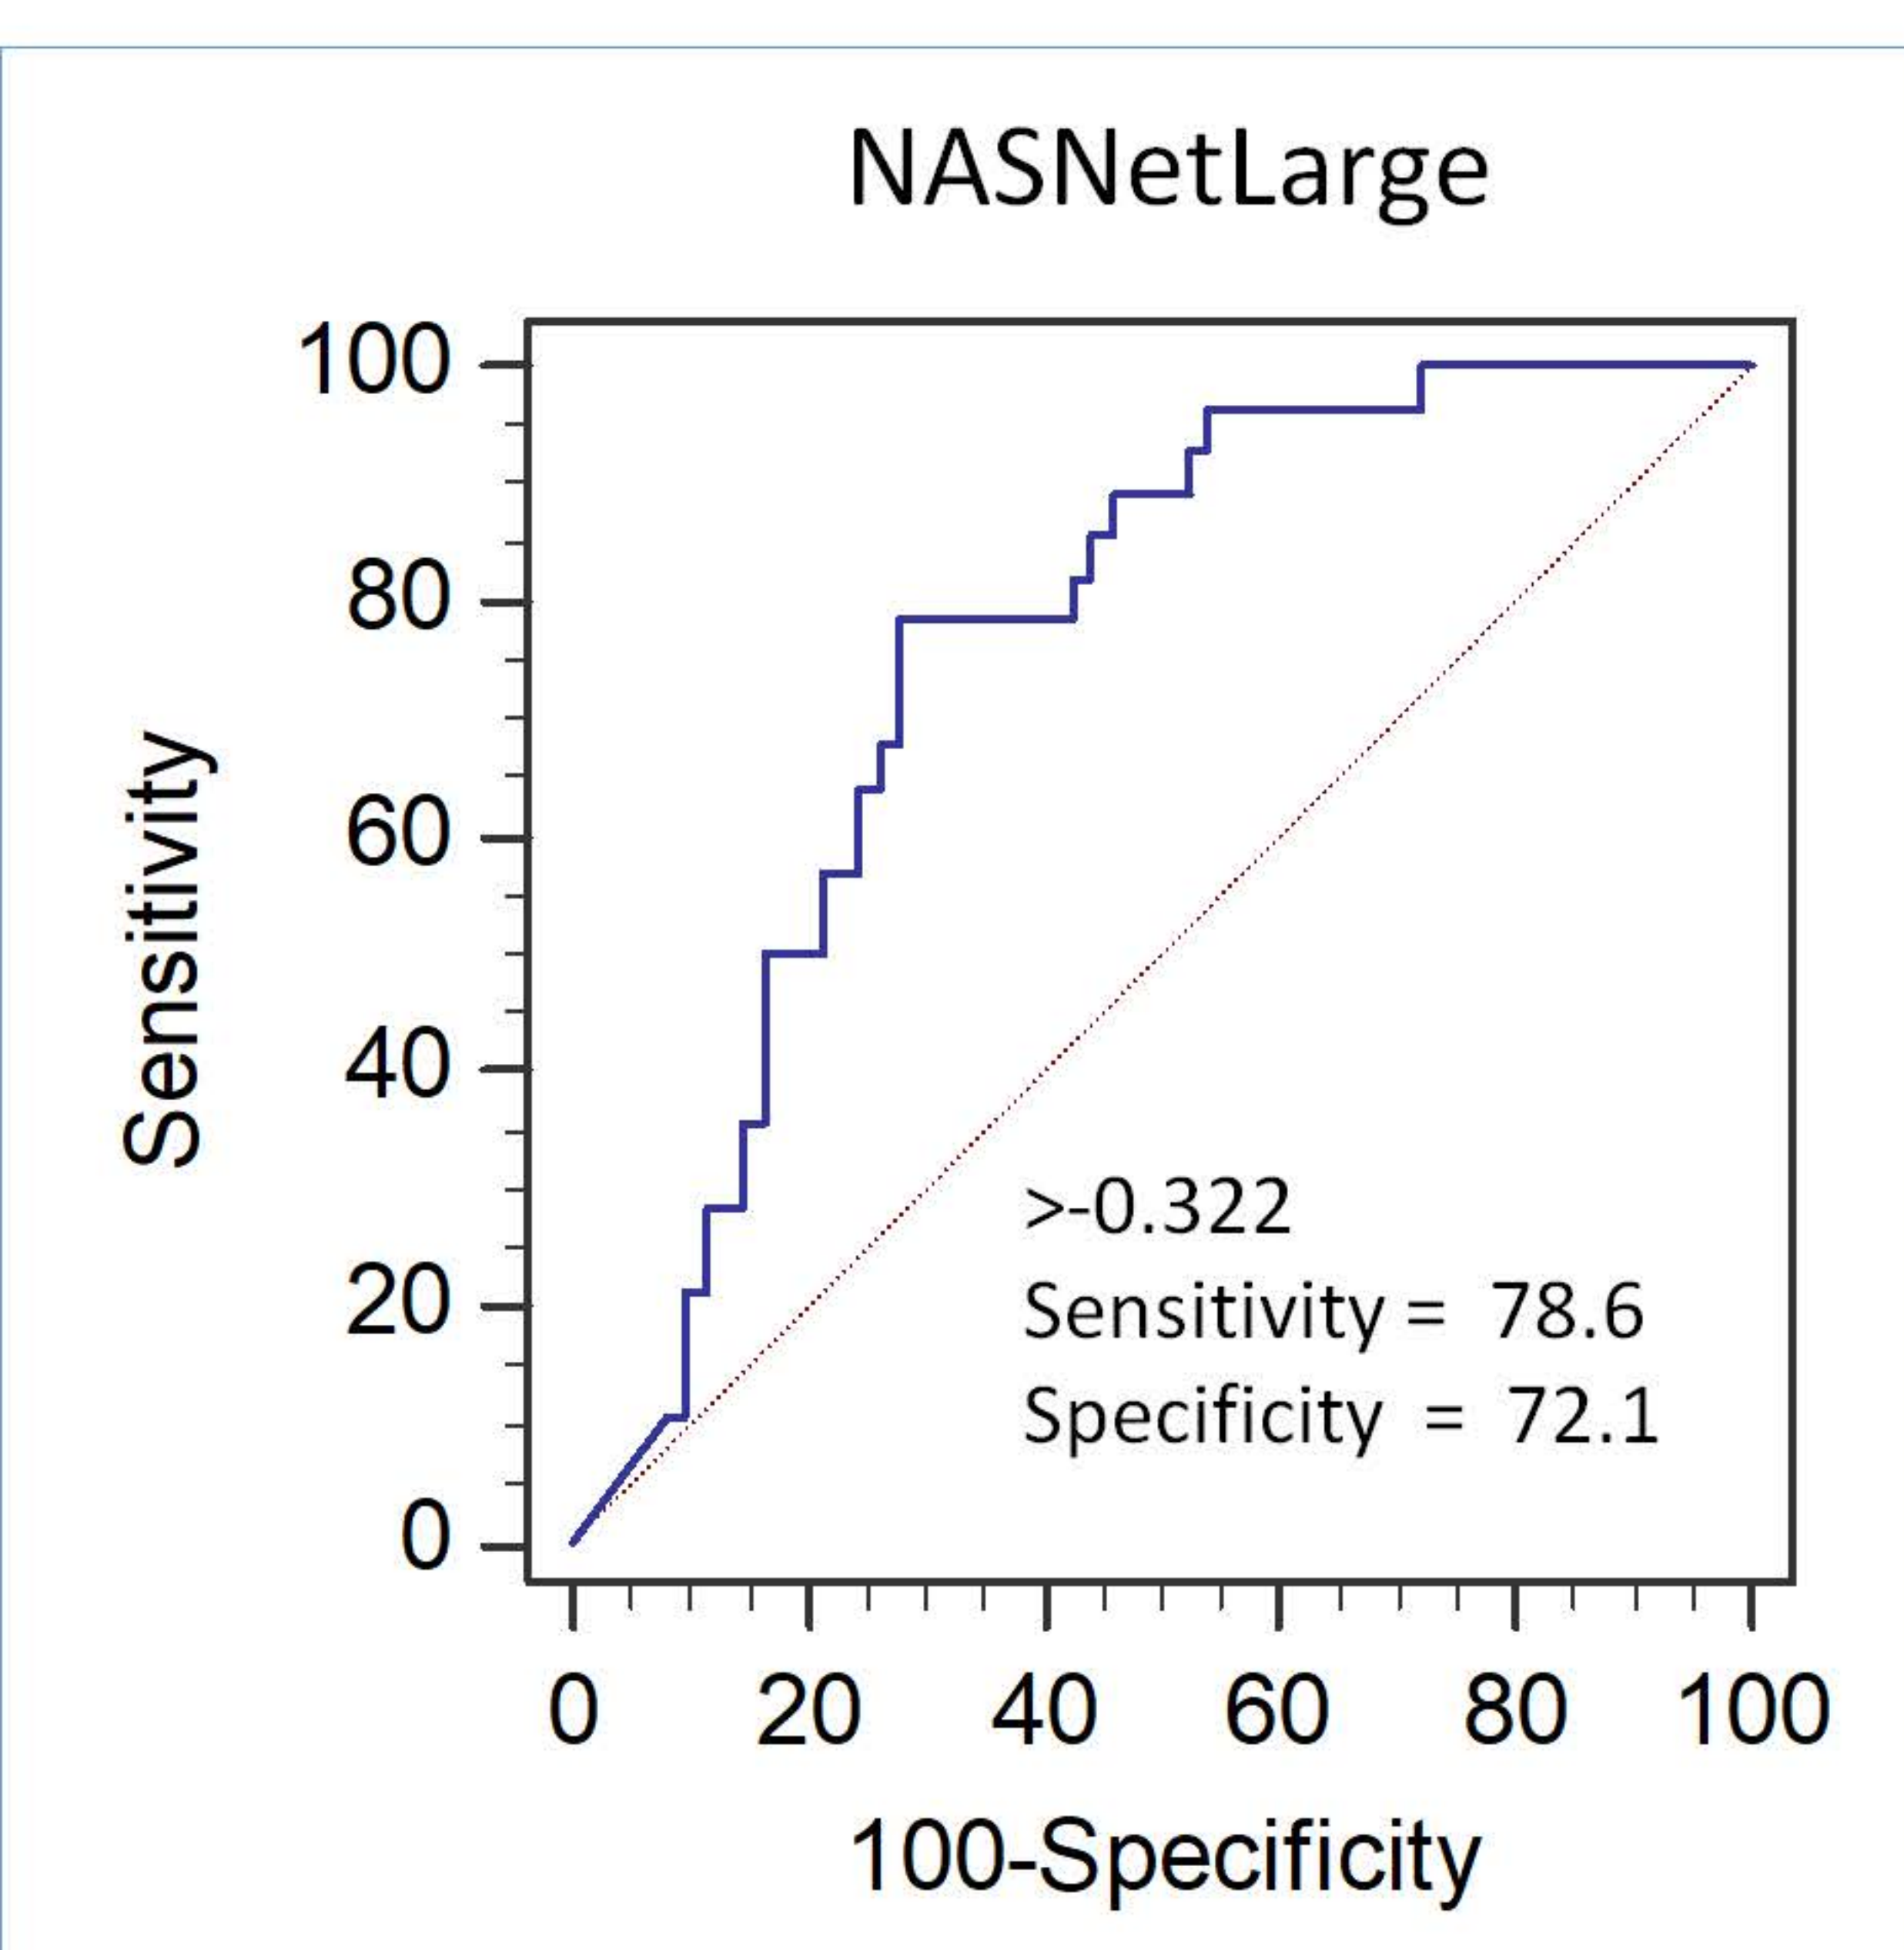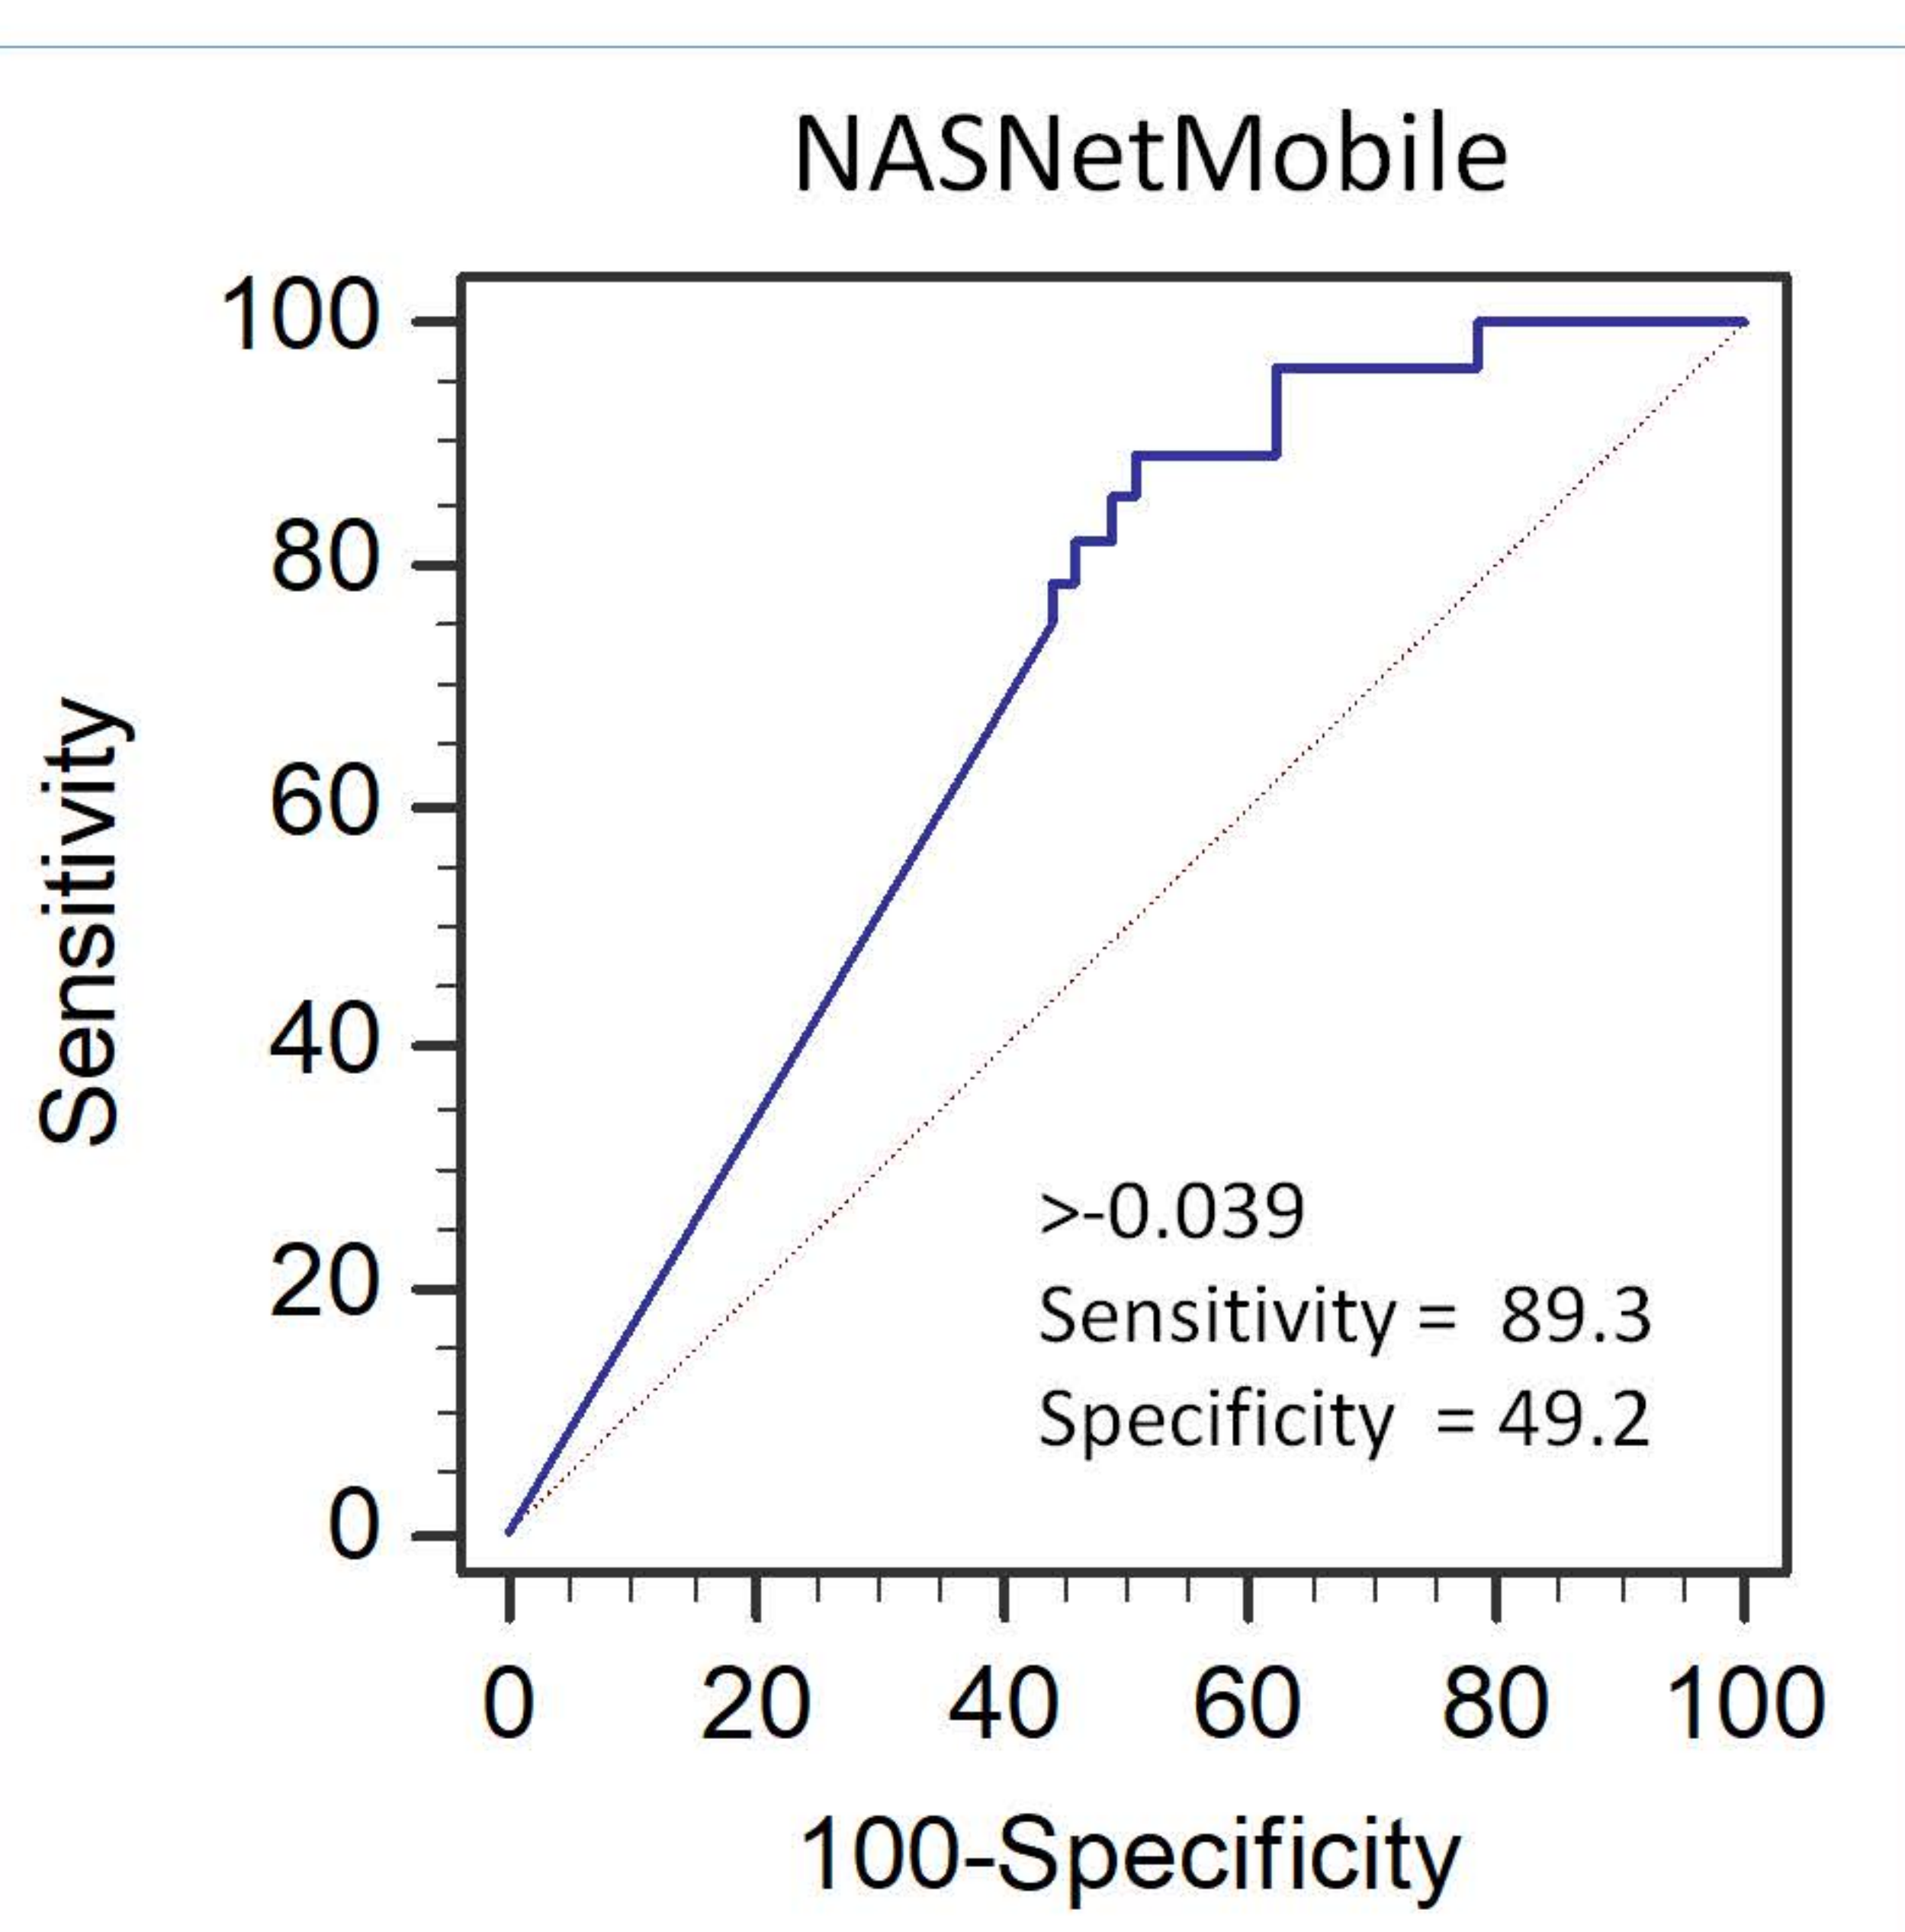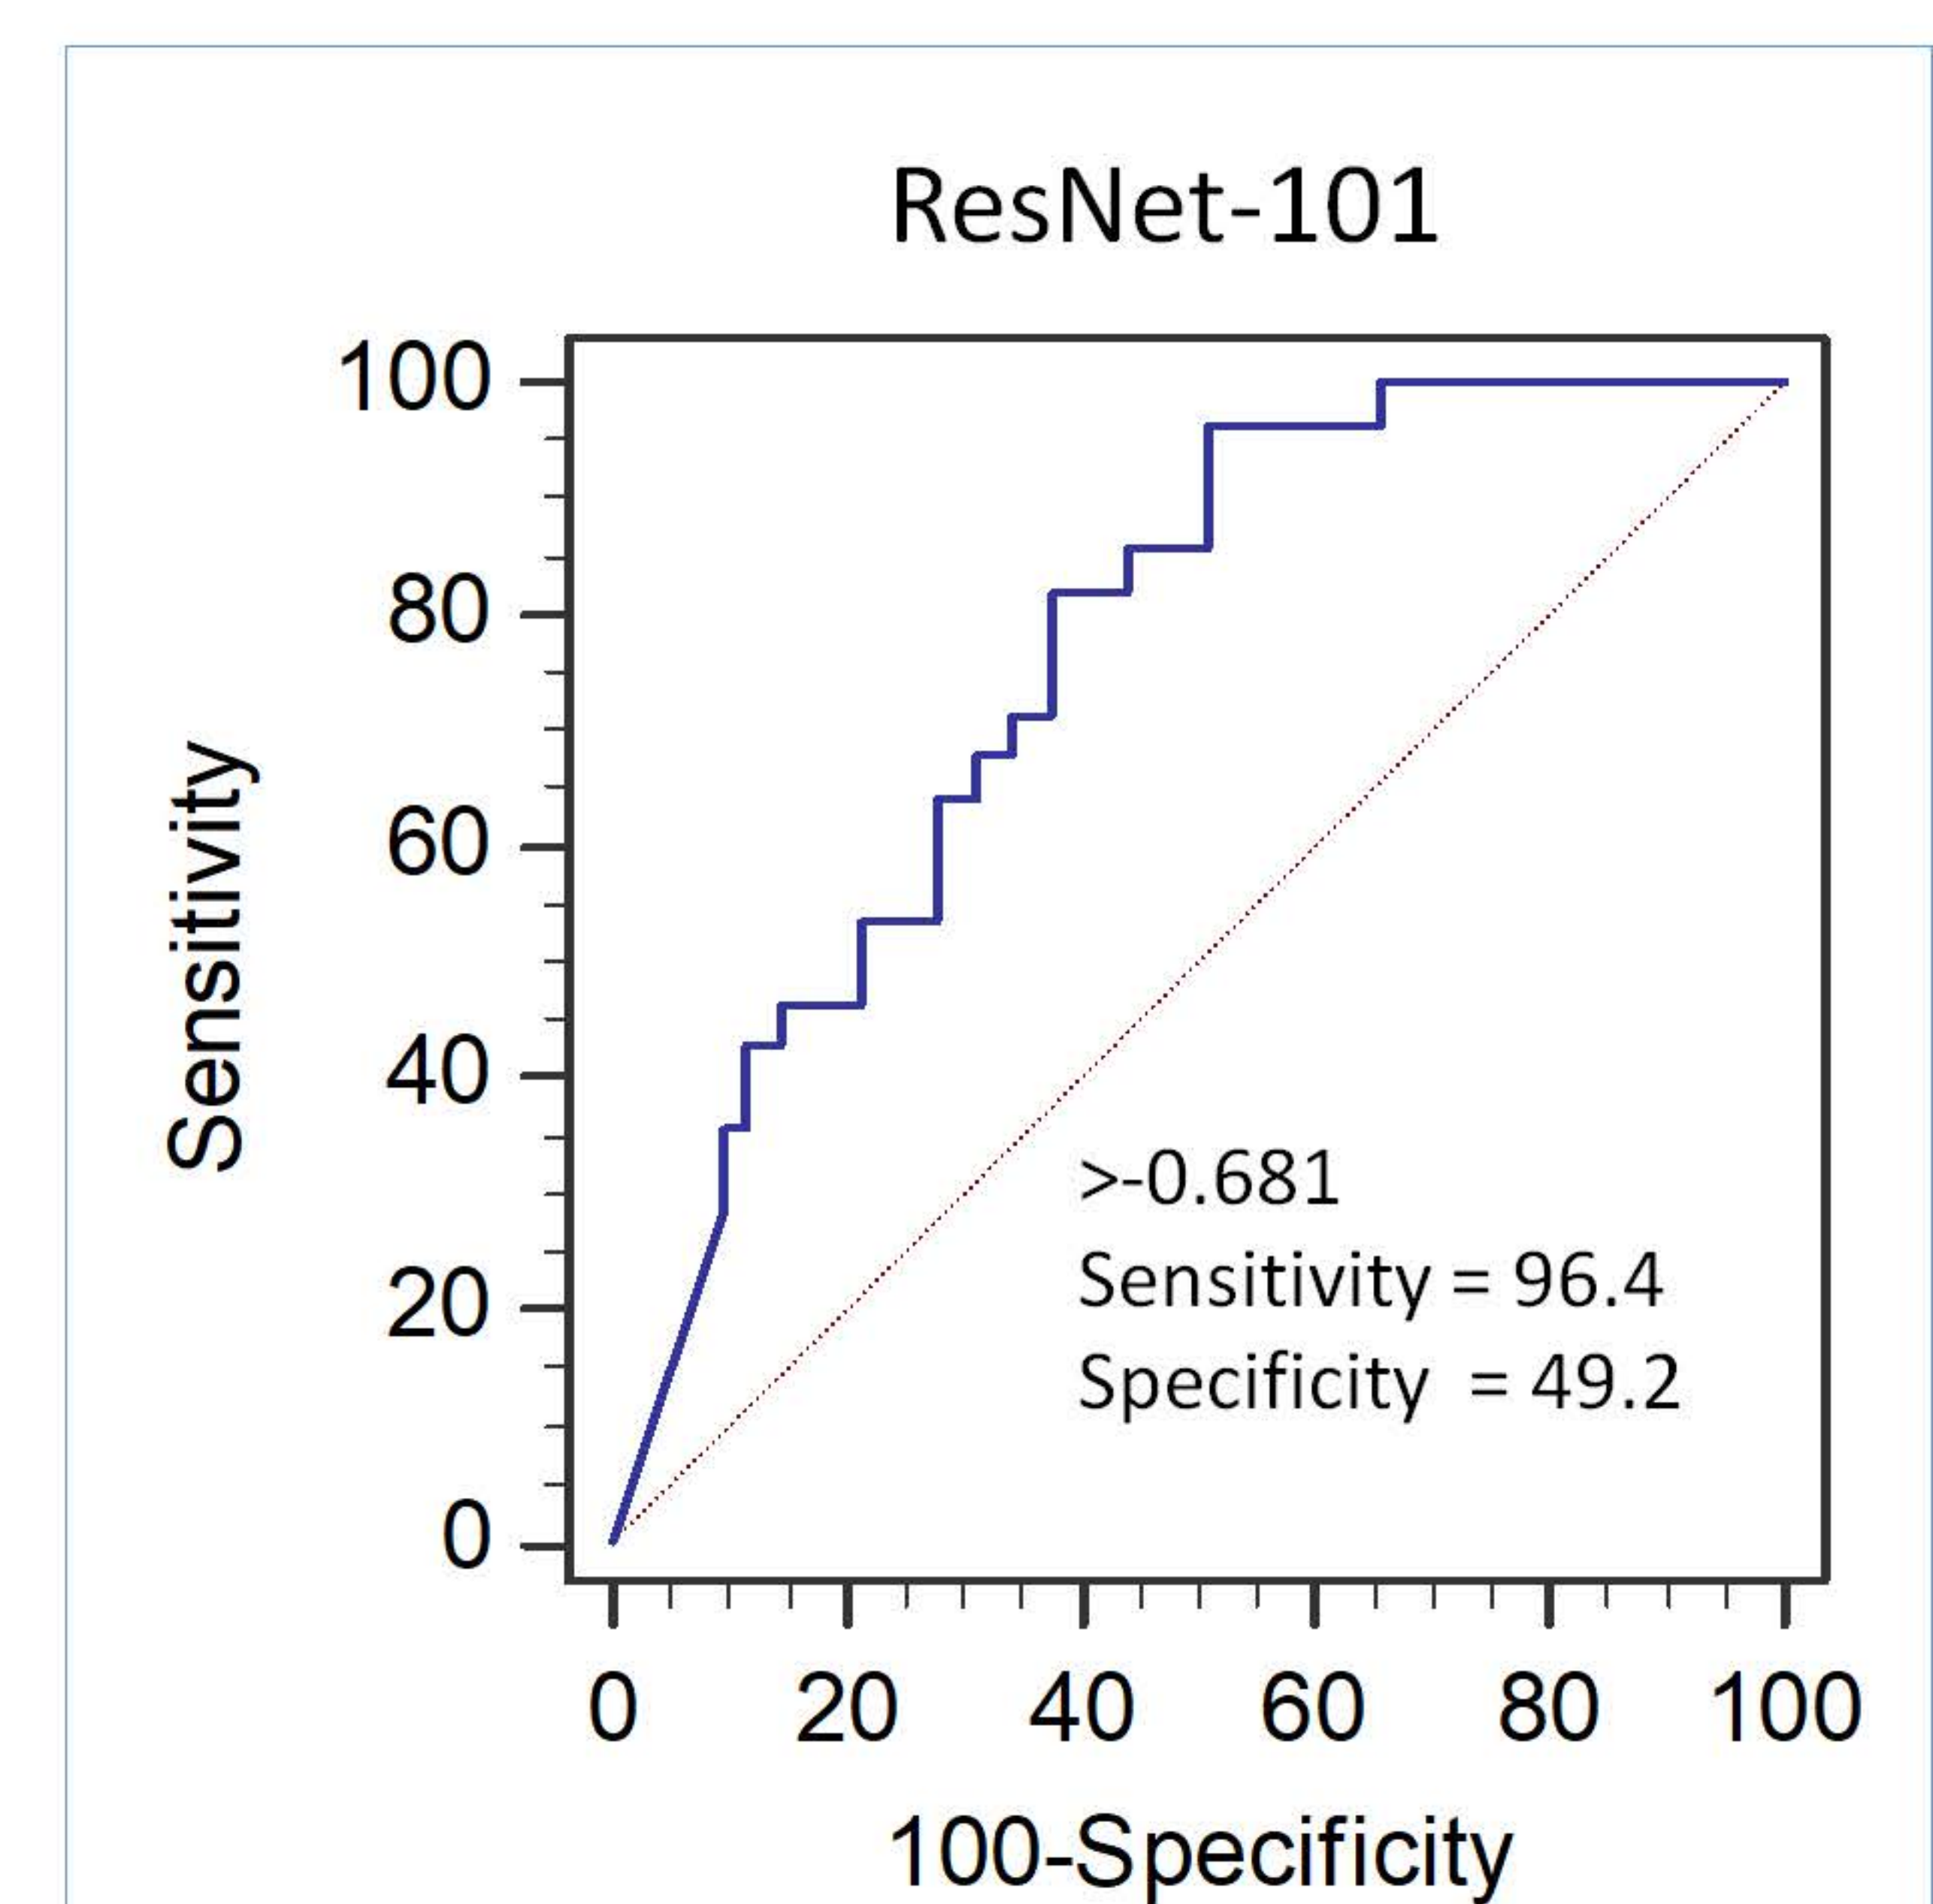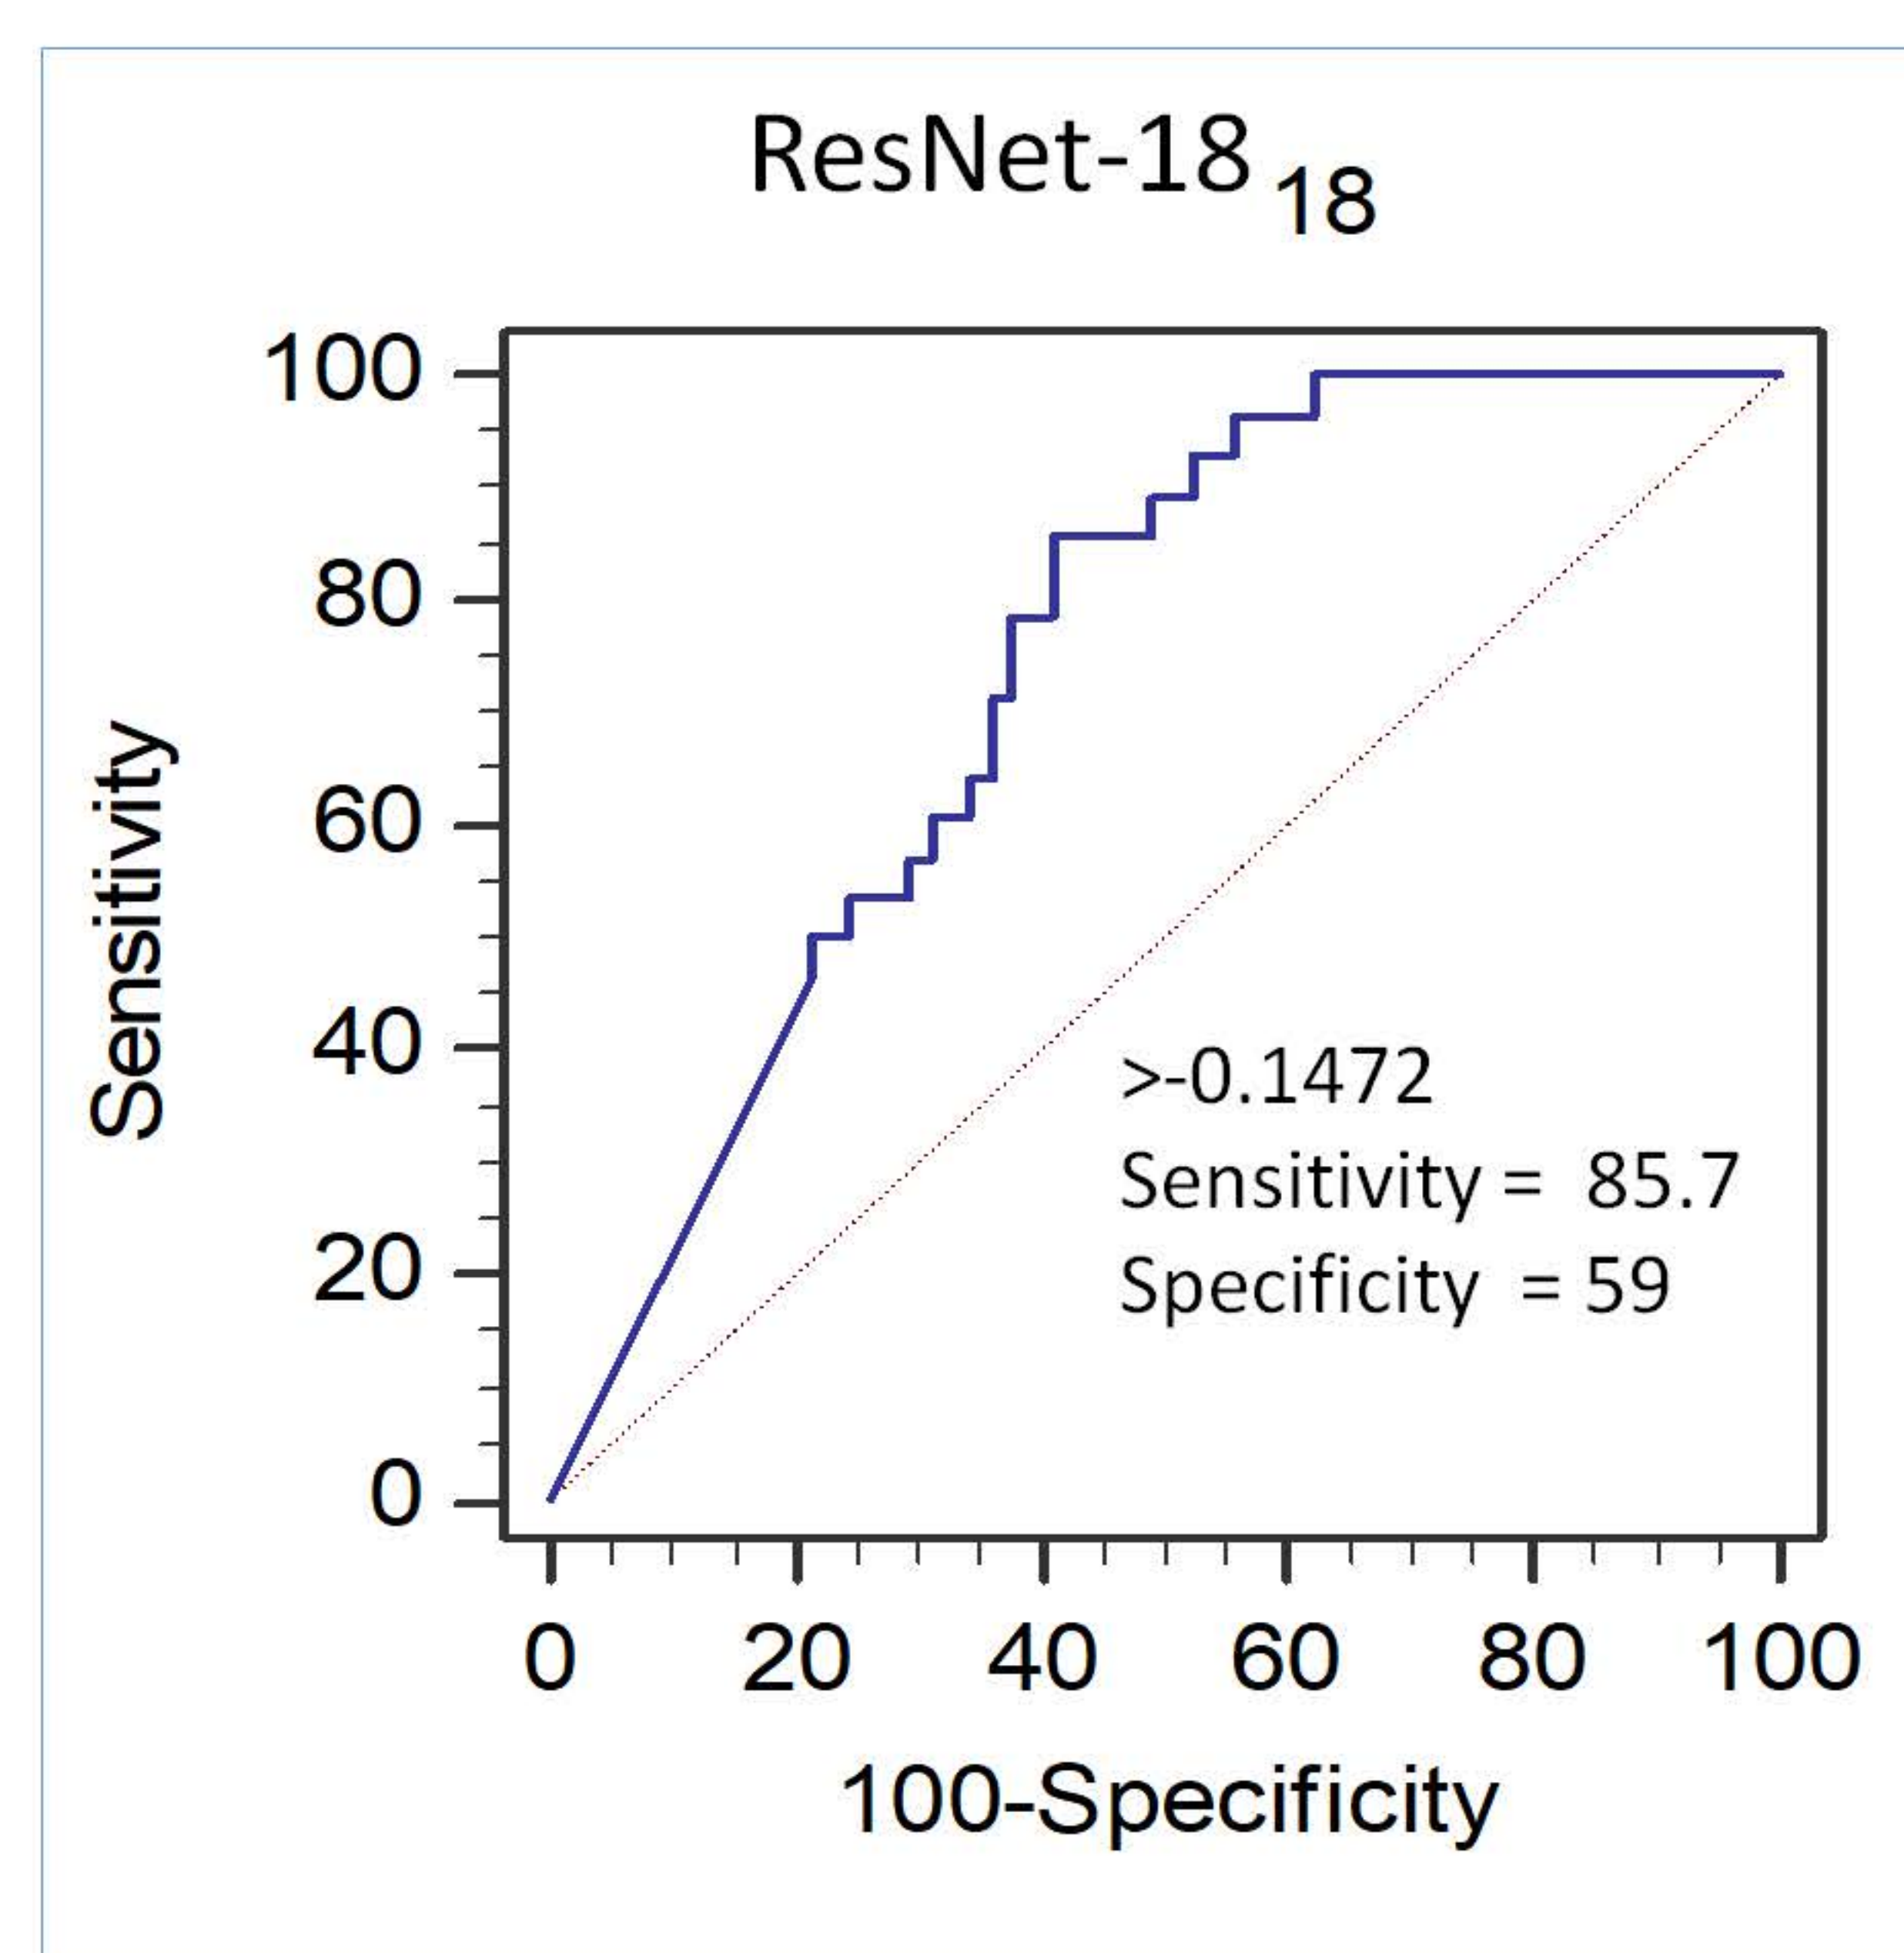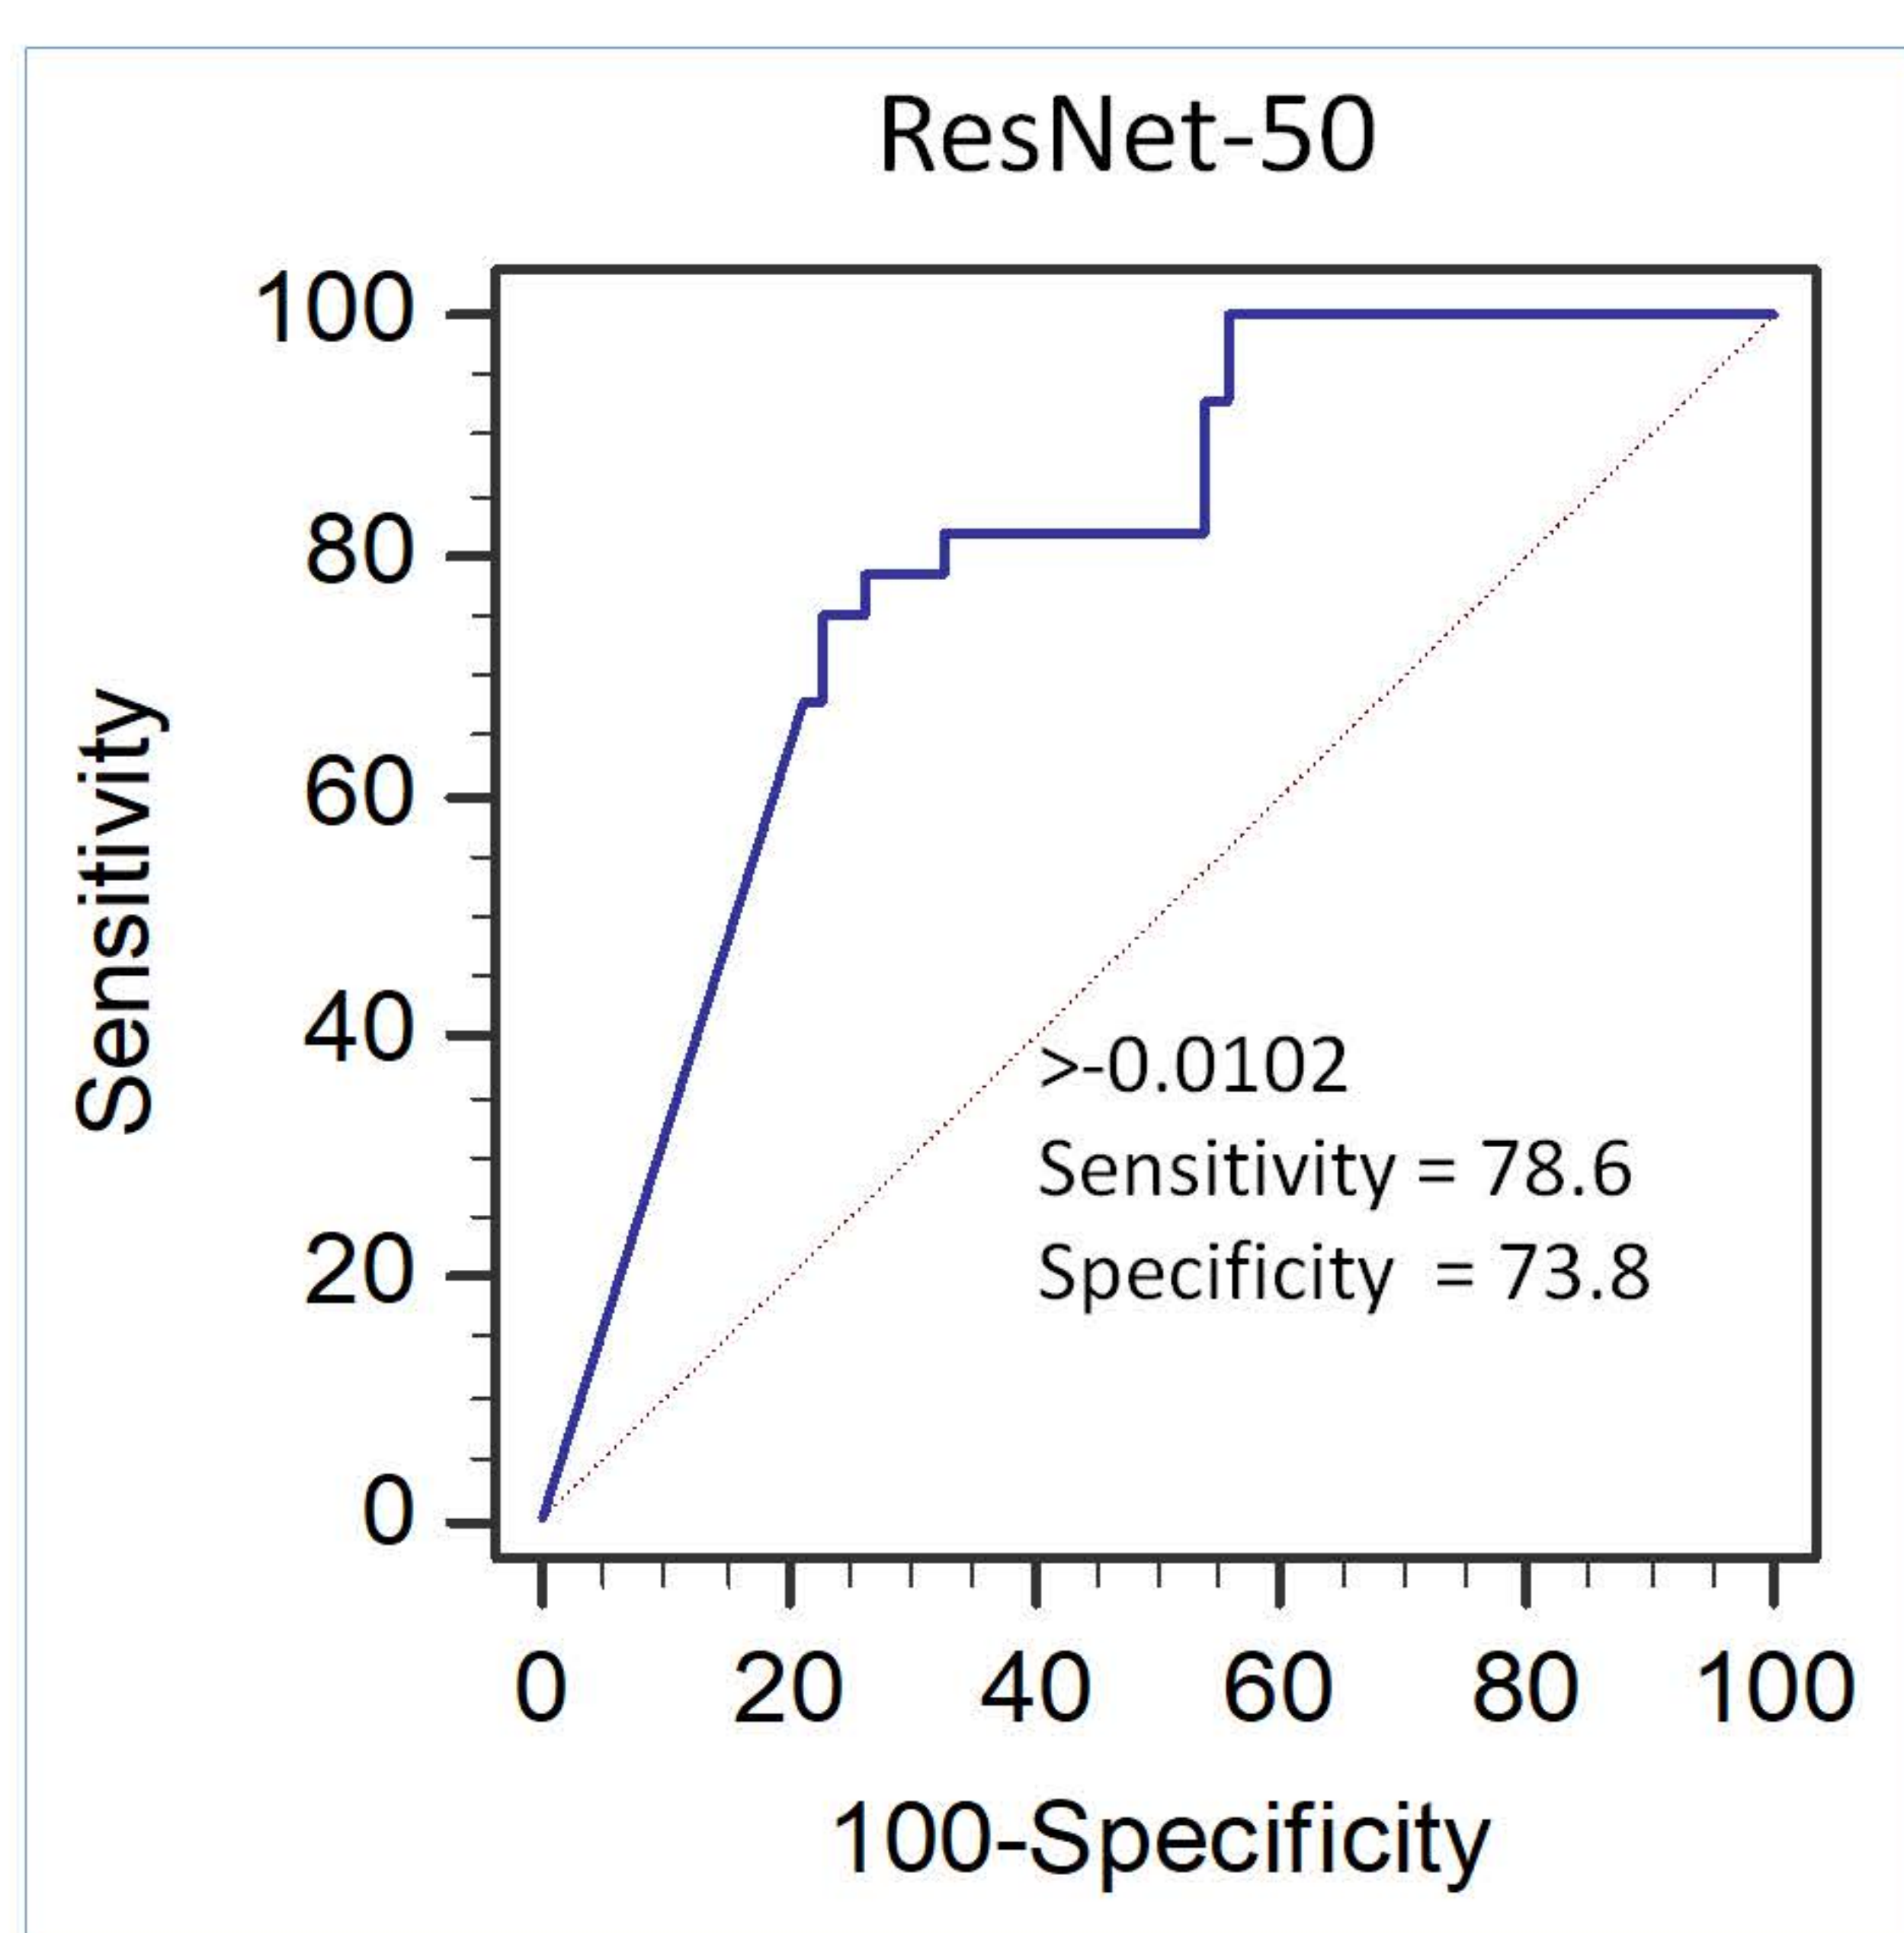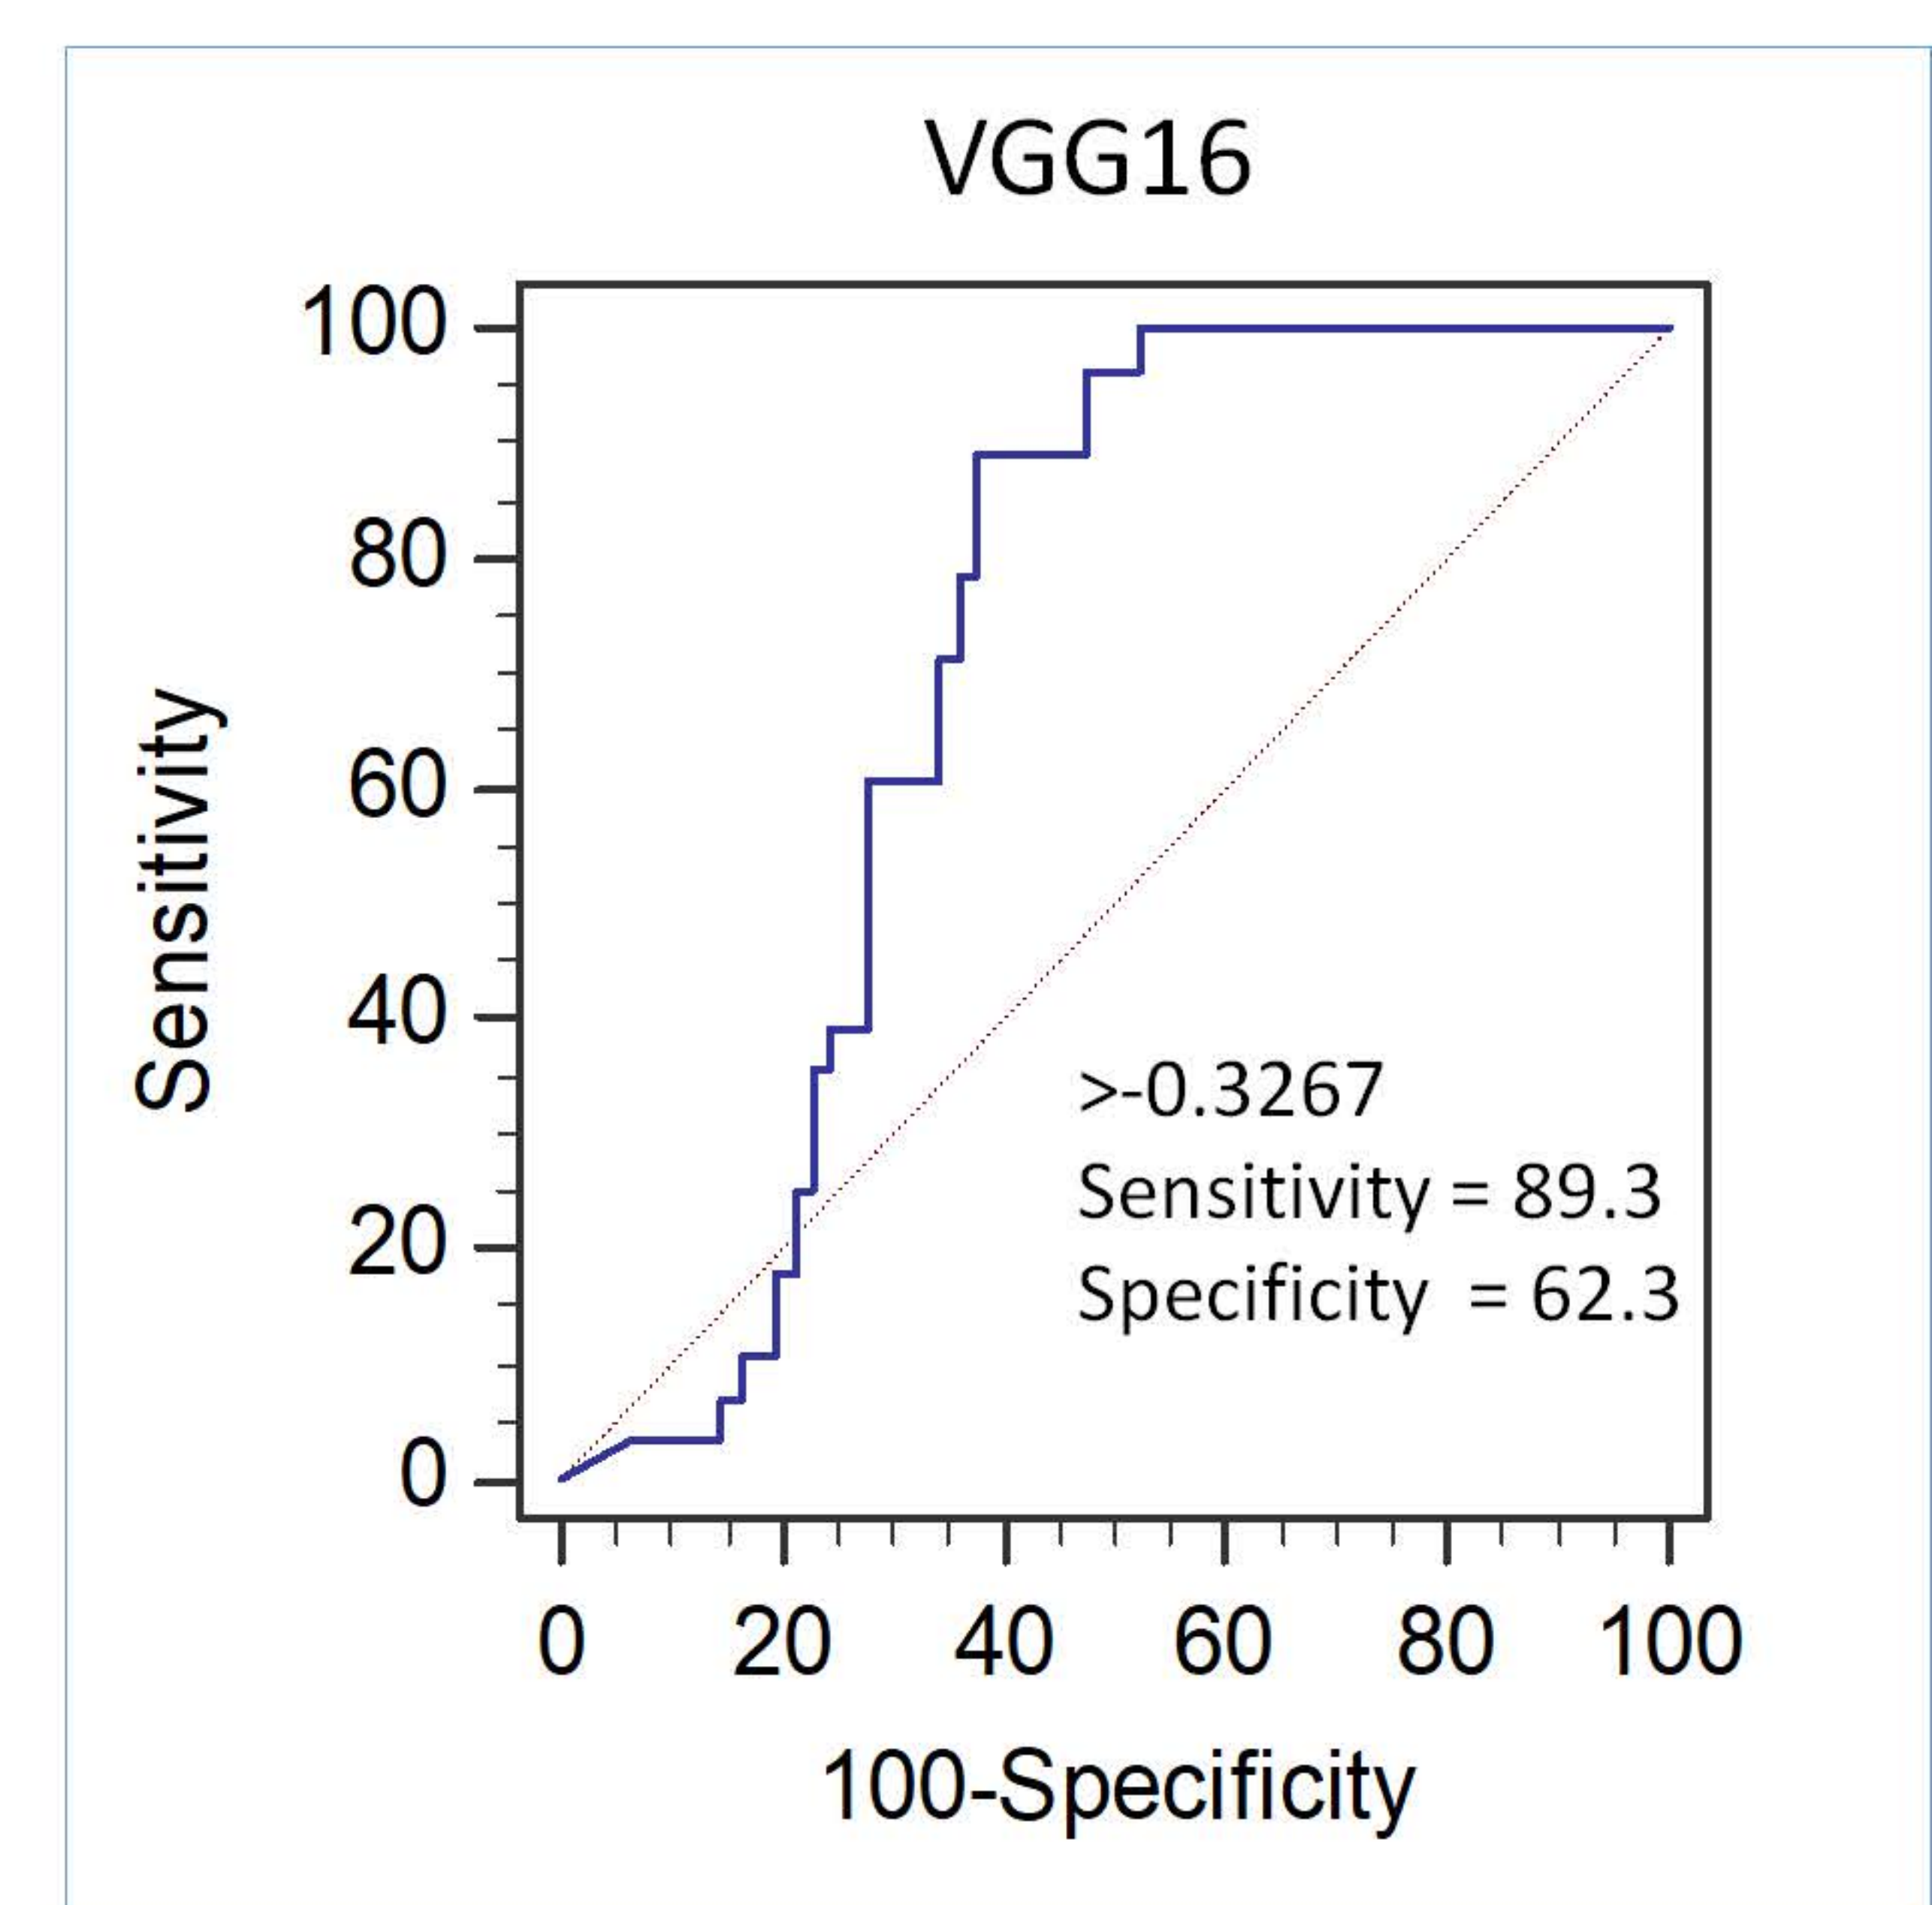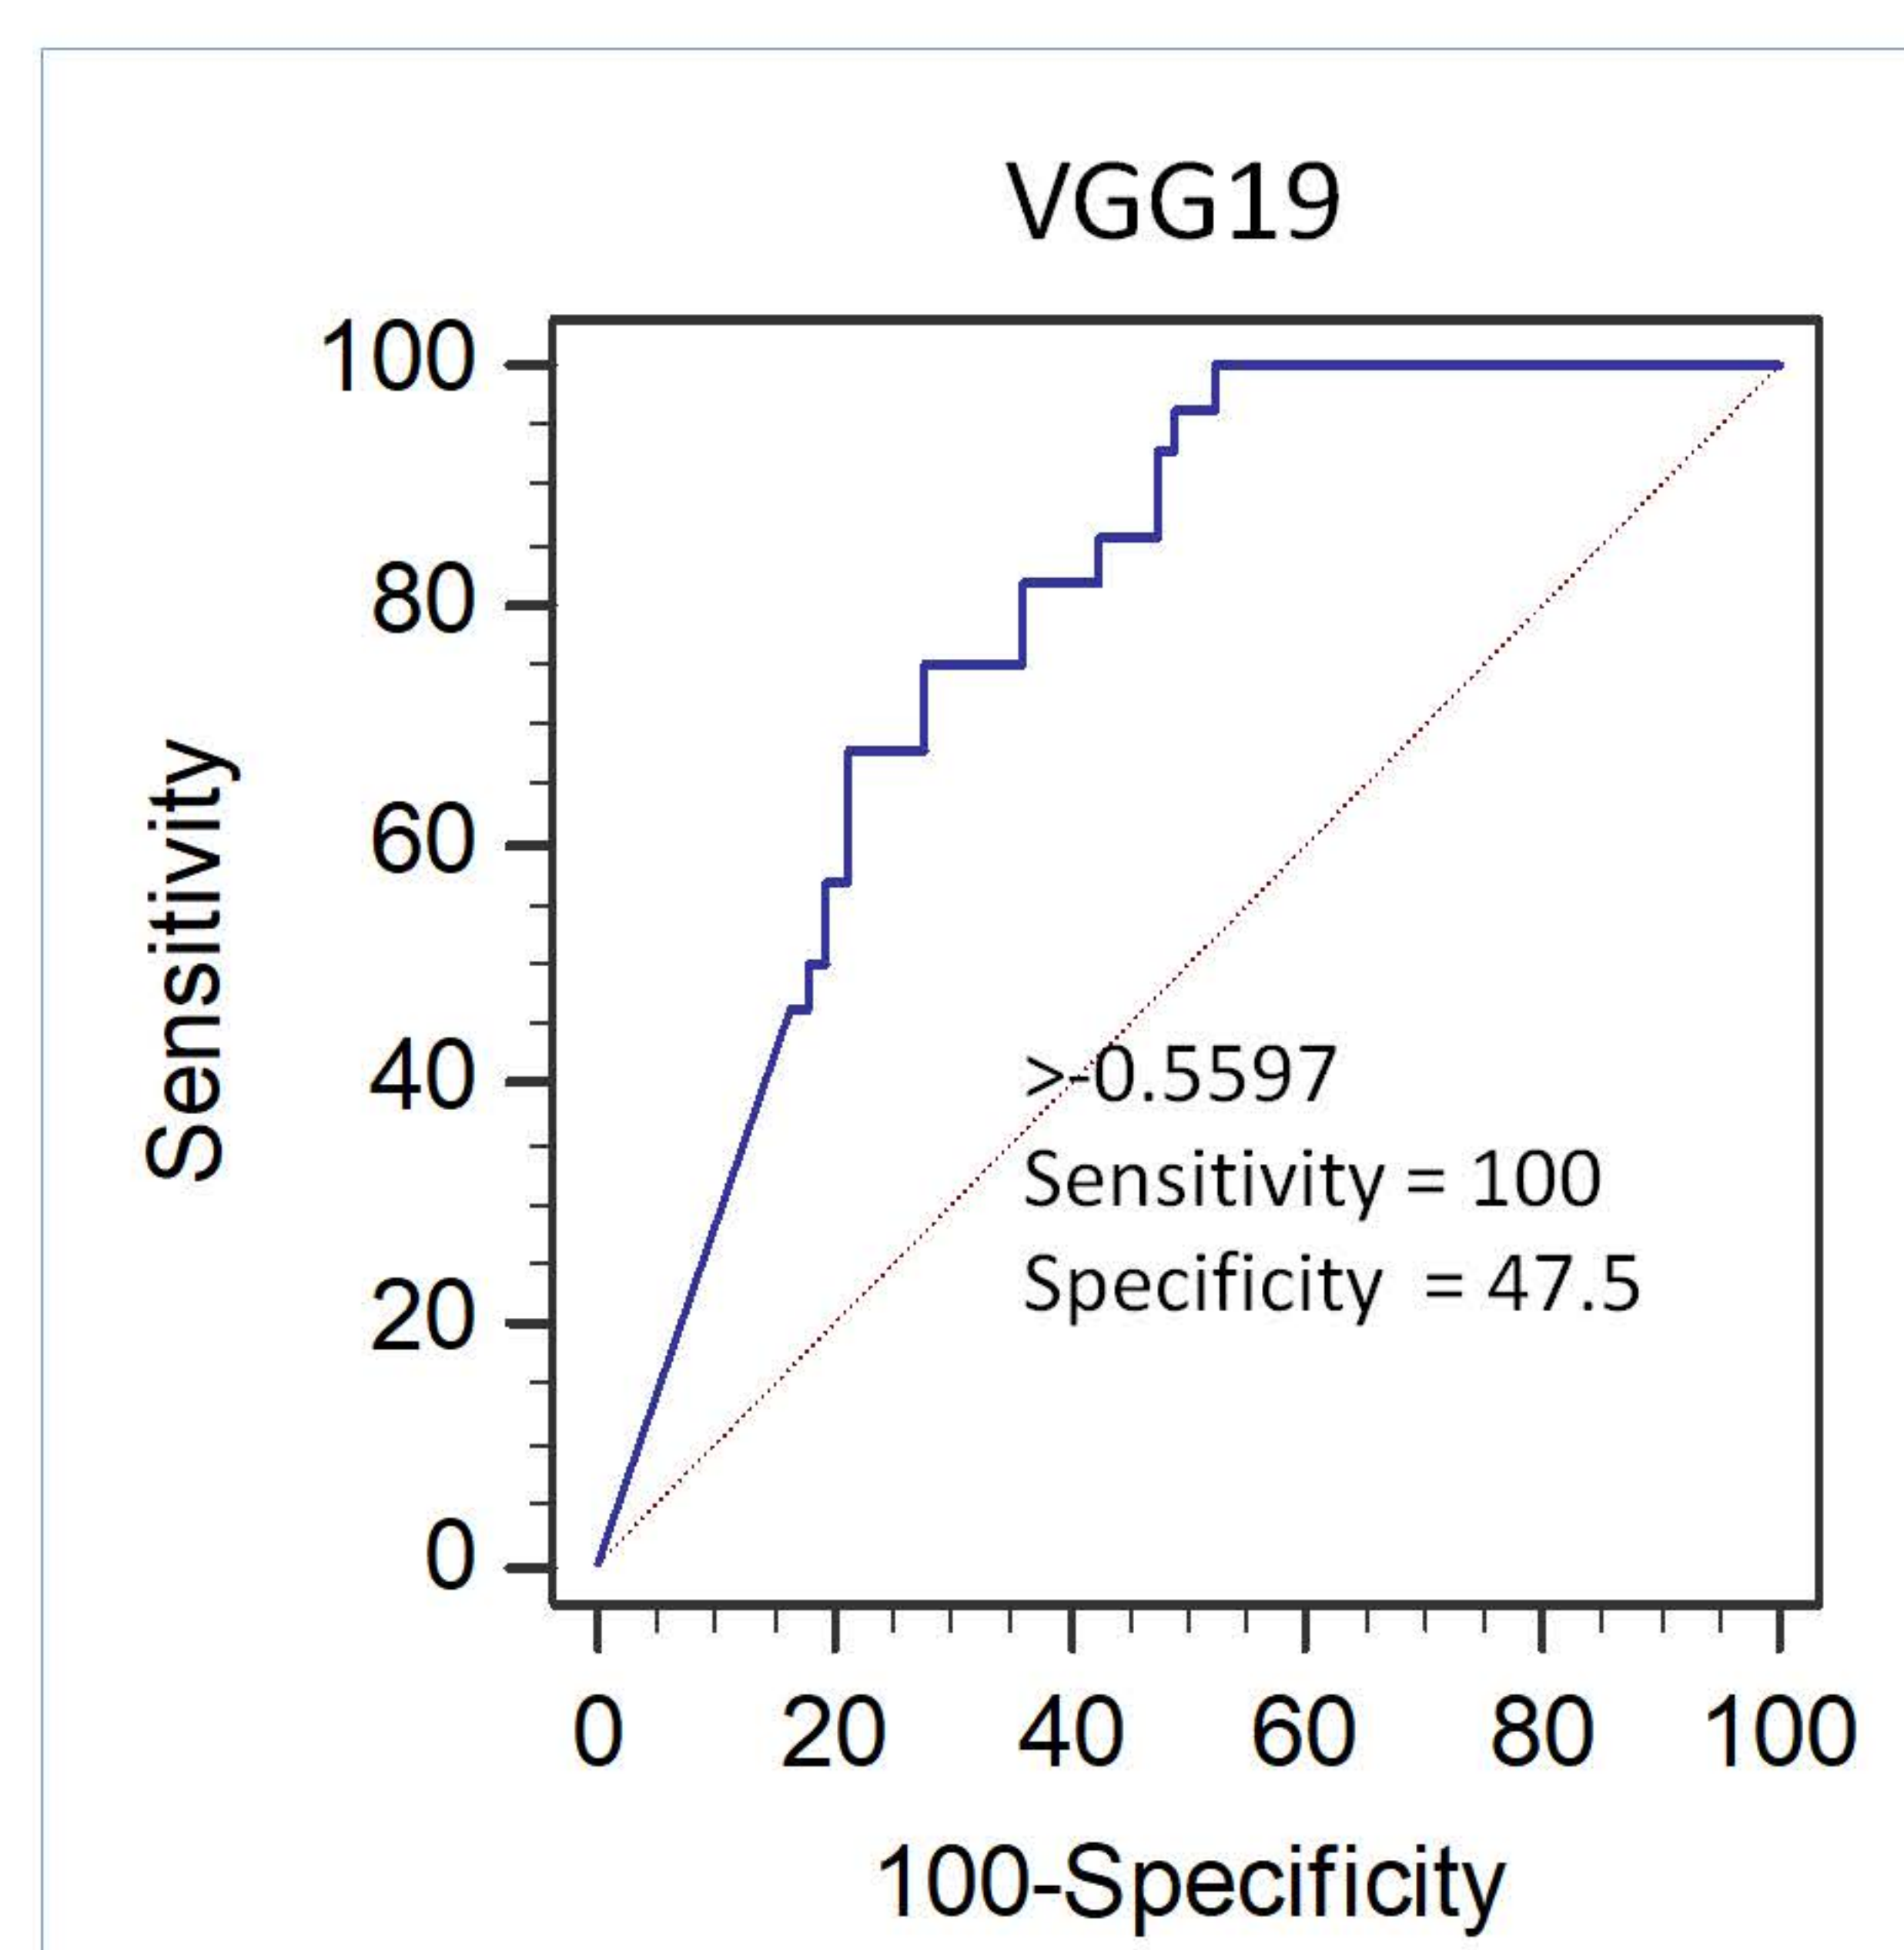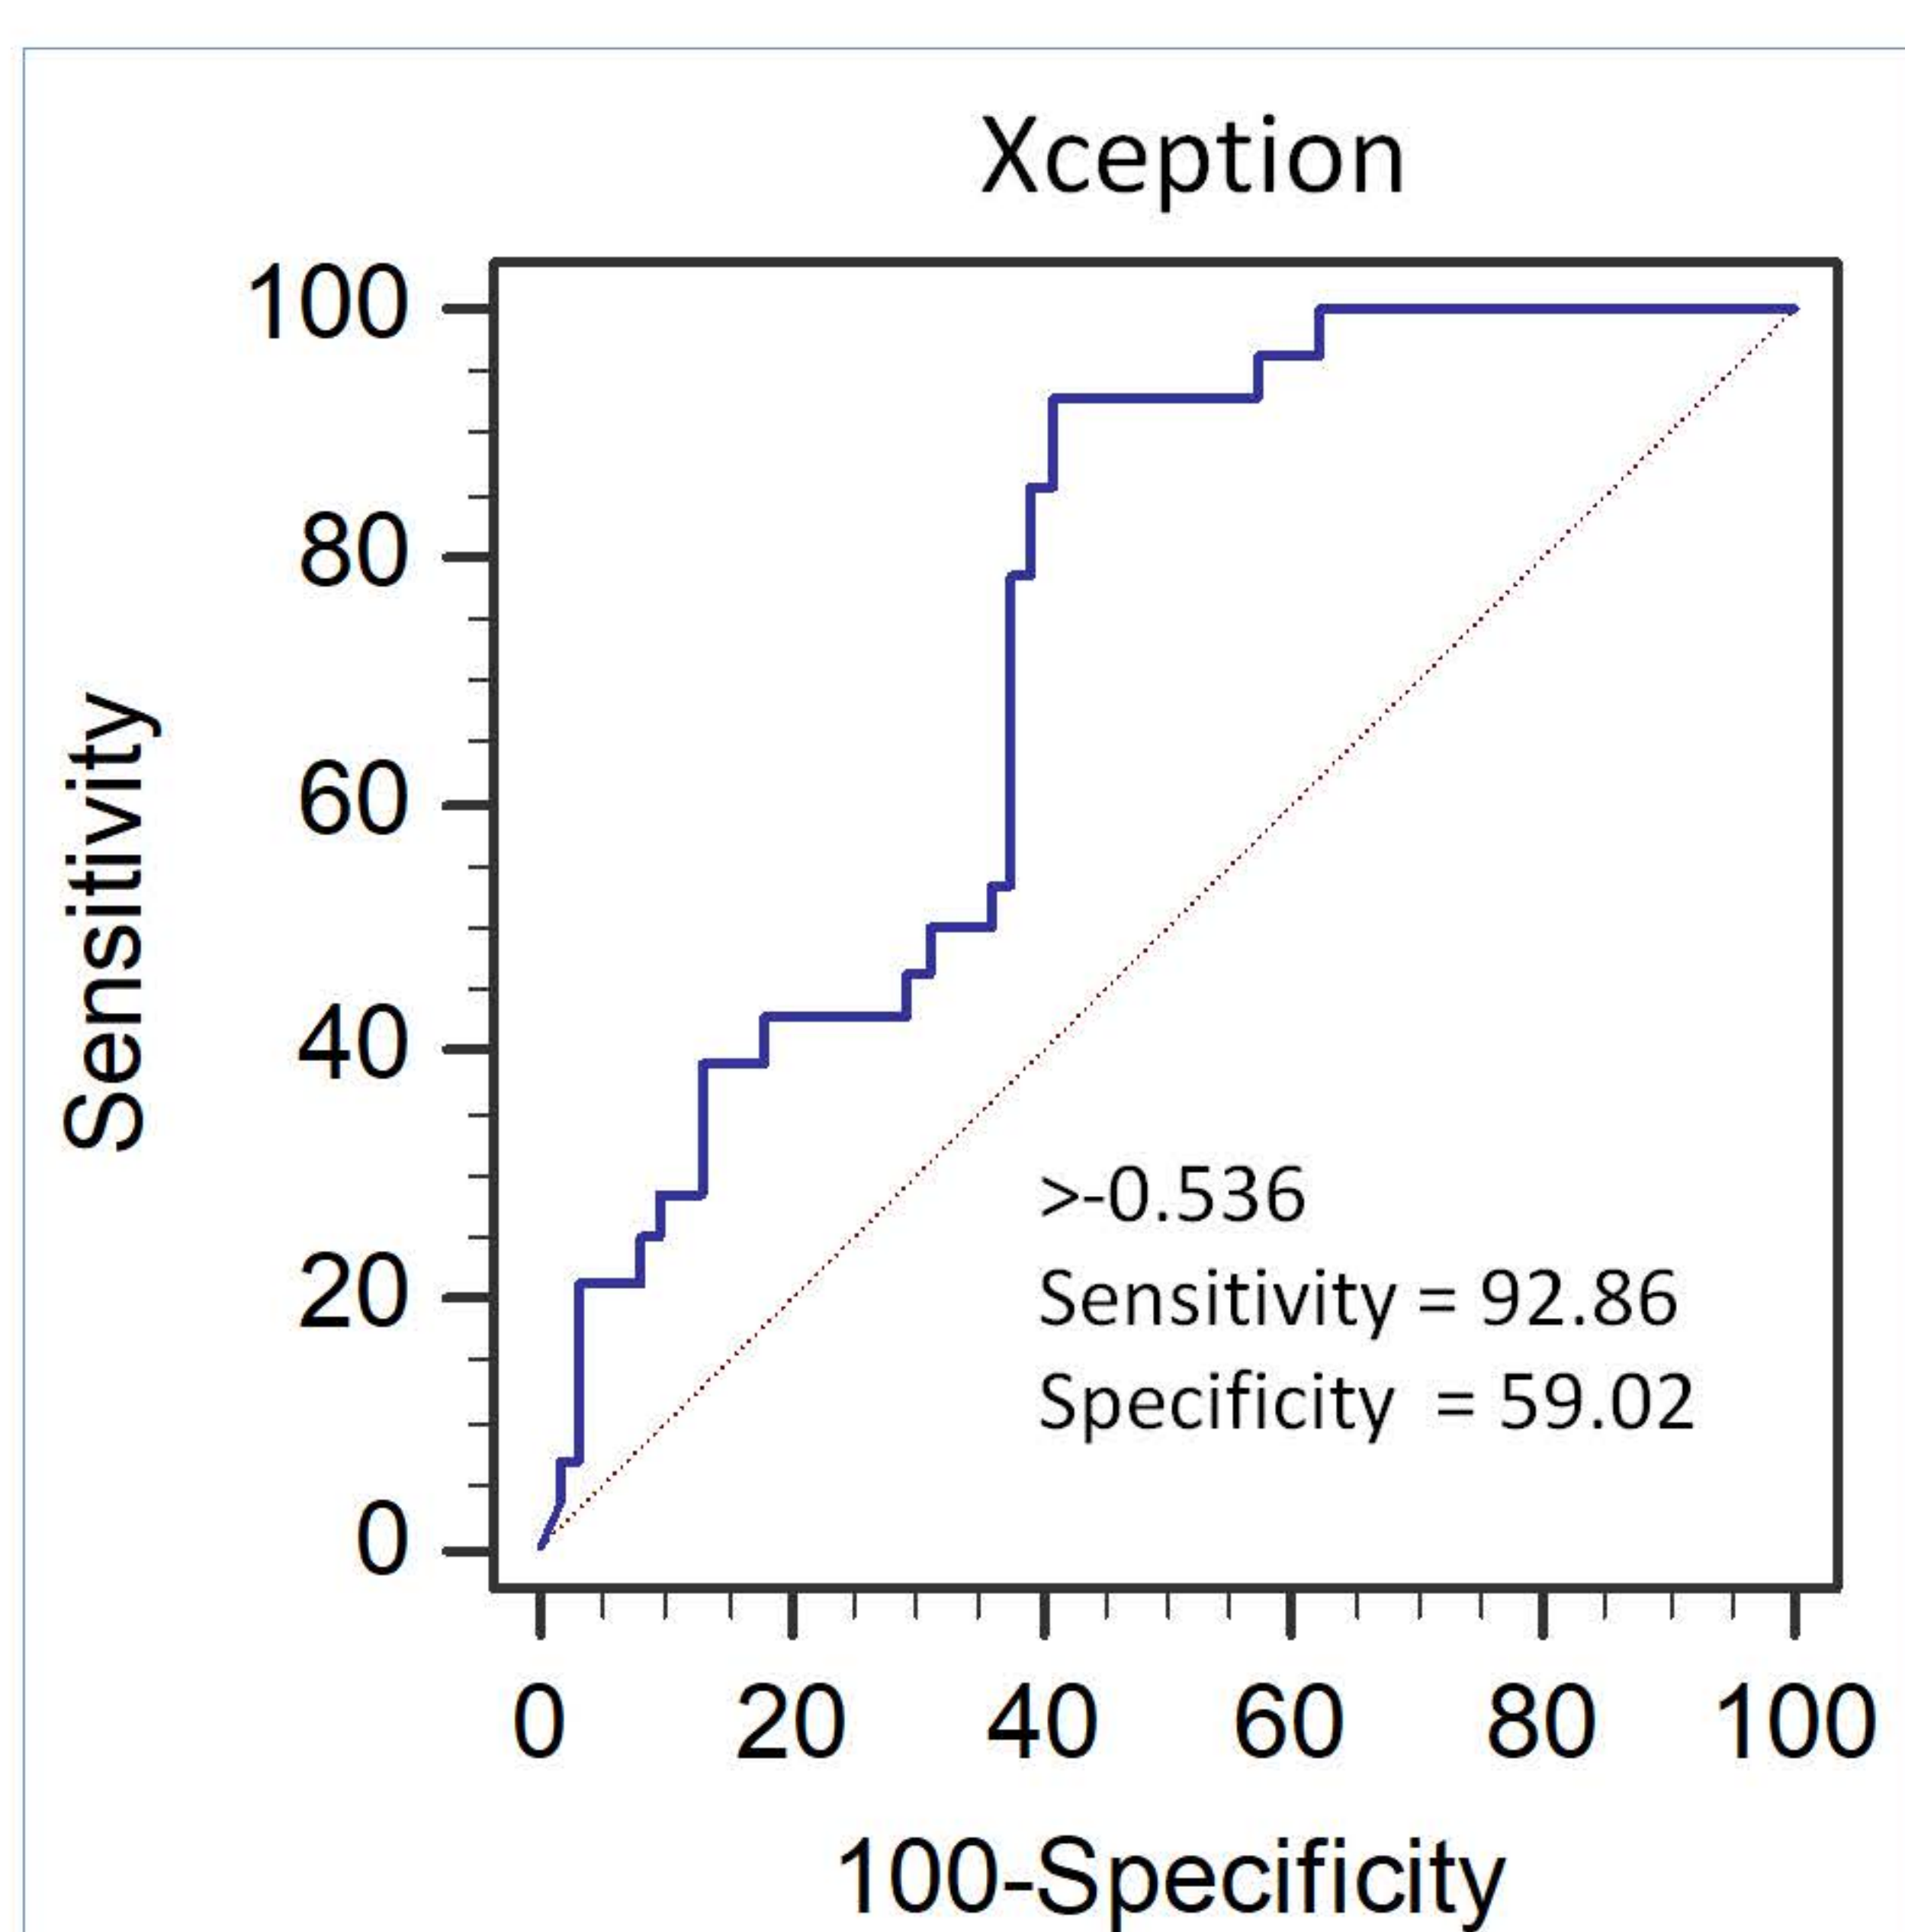

Supplement: s1 [file s1]

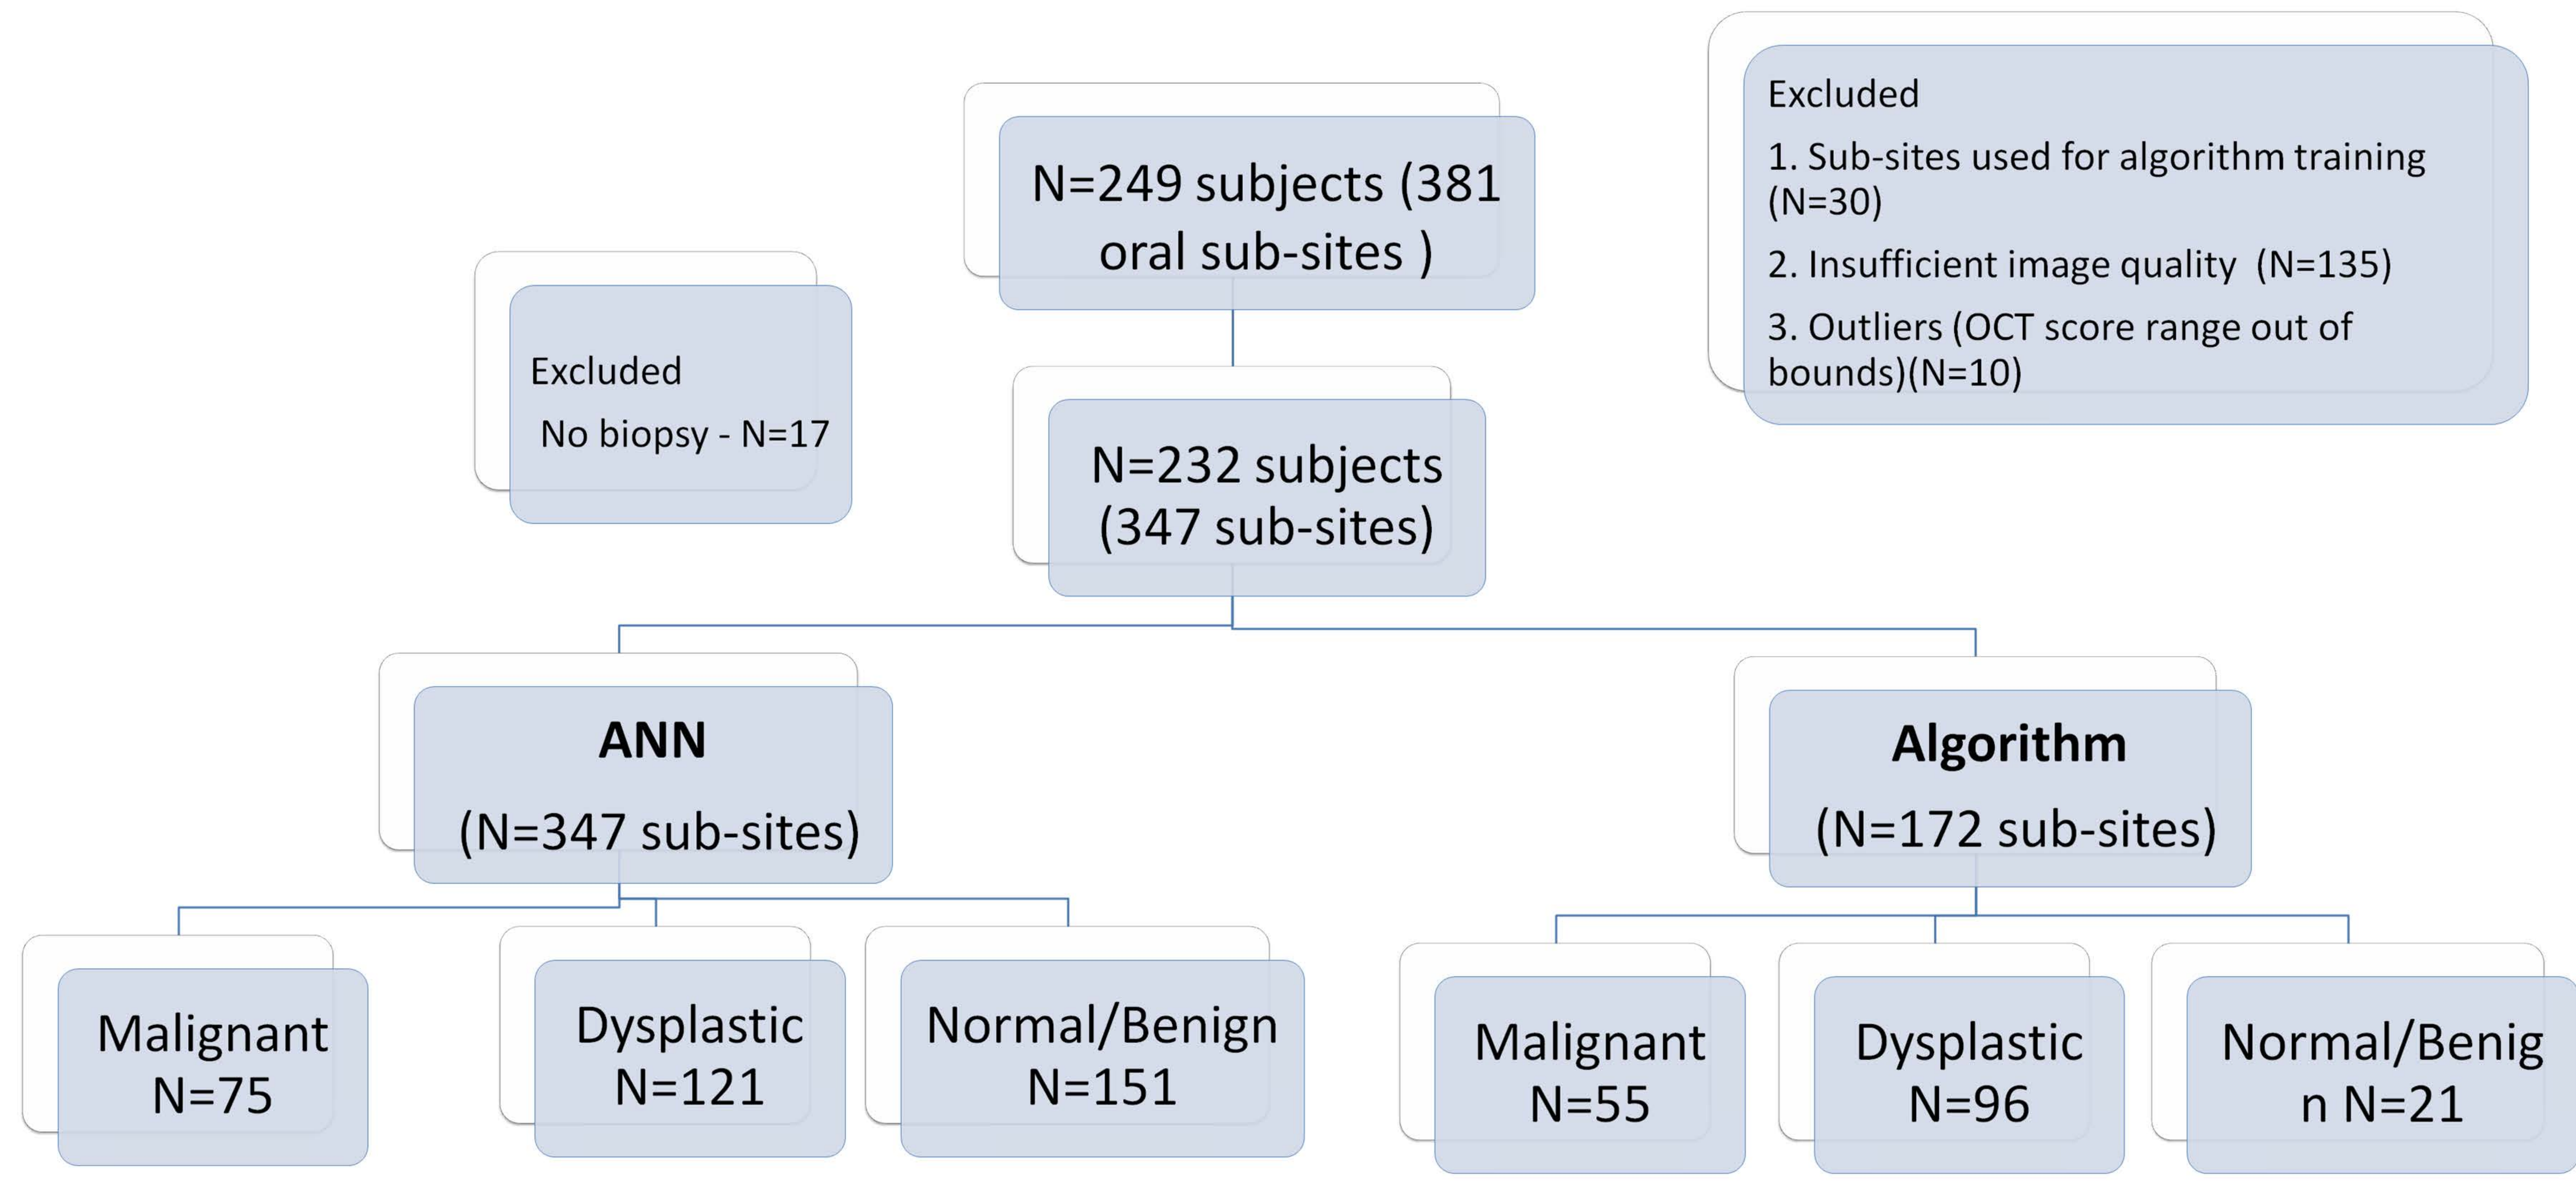

Supplement: s1 [file s1]

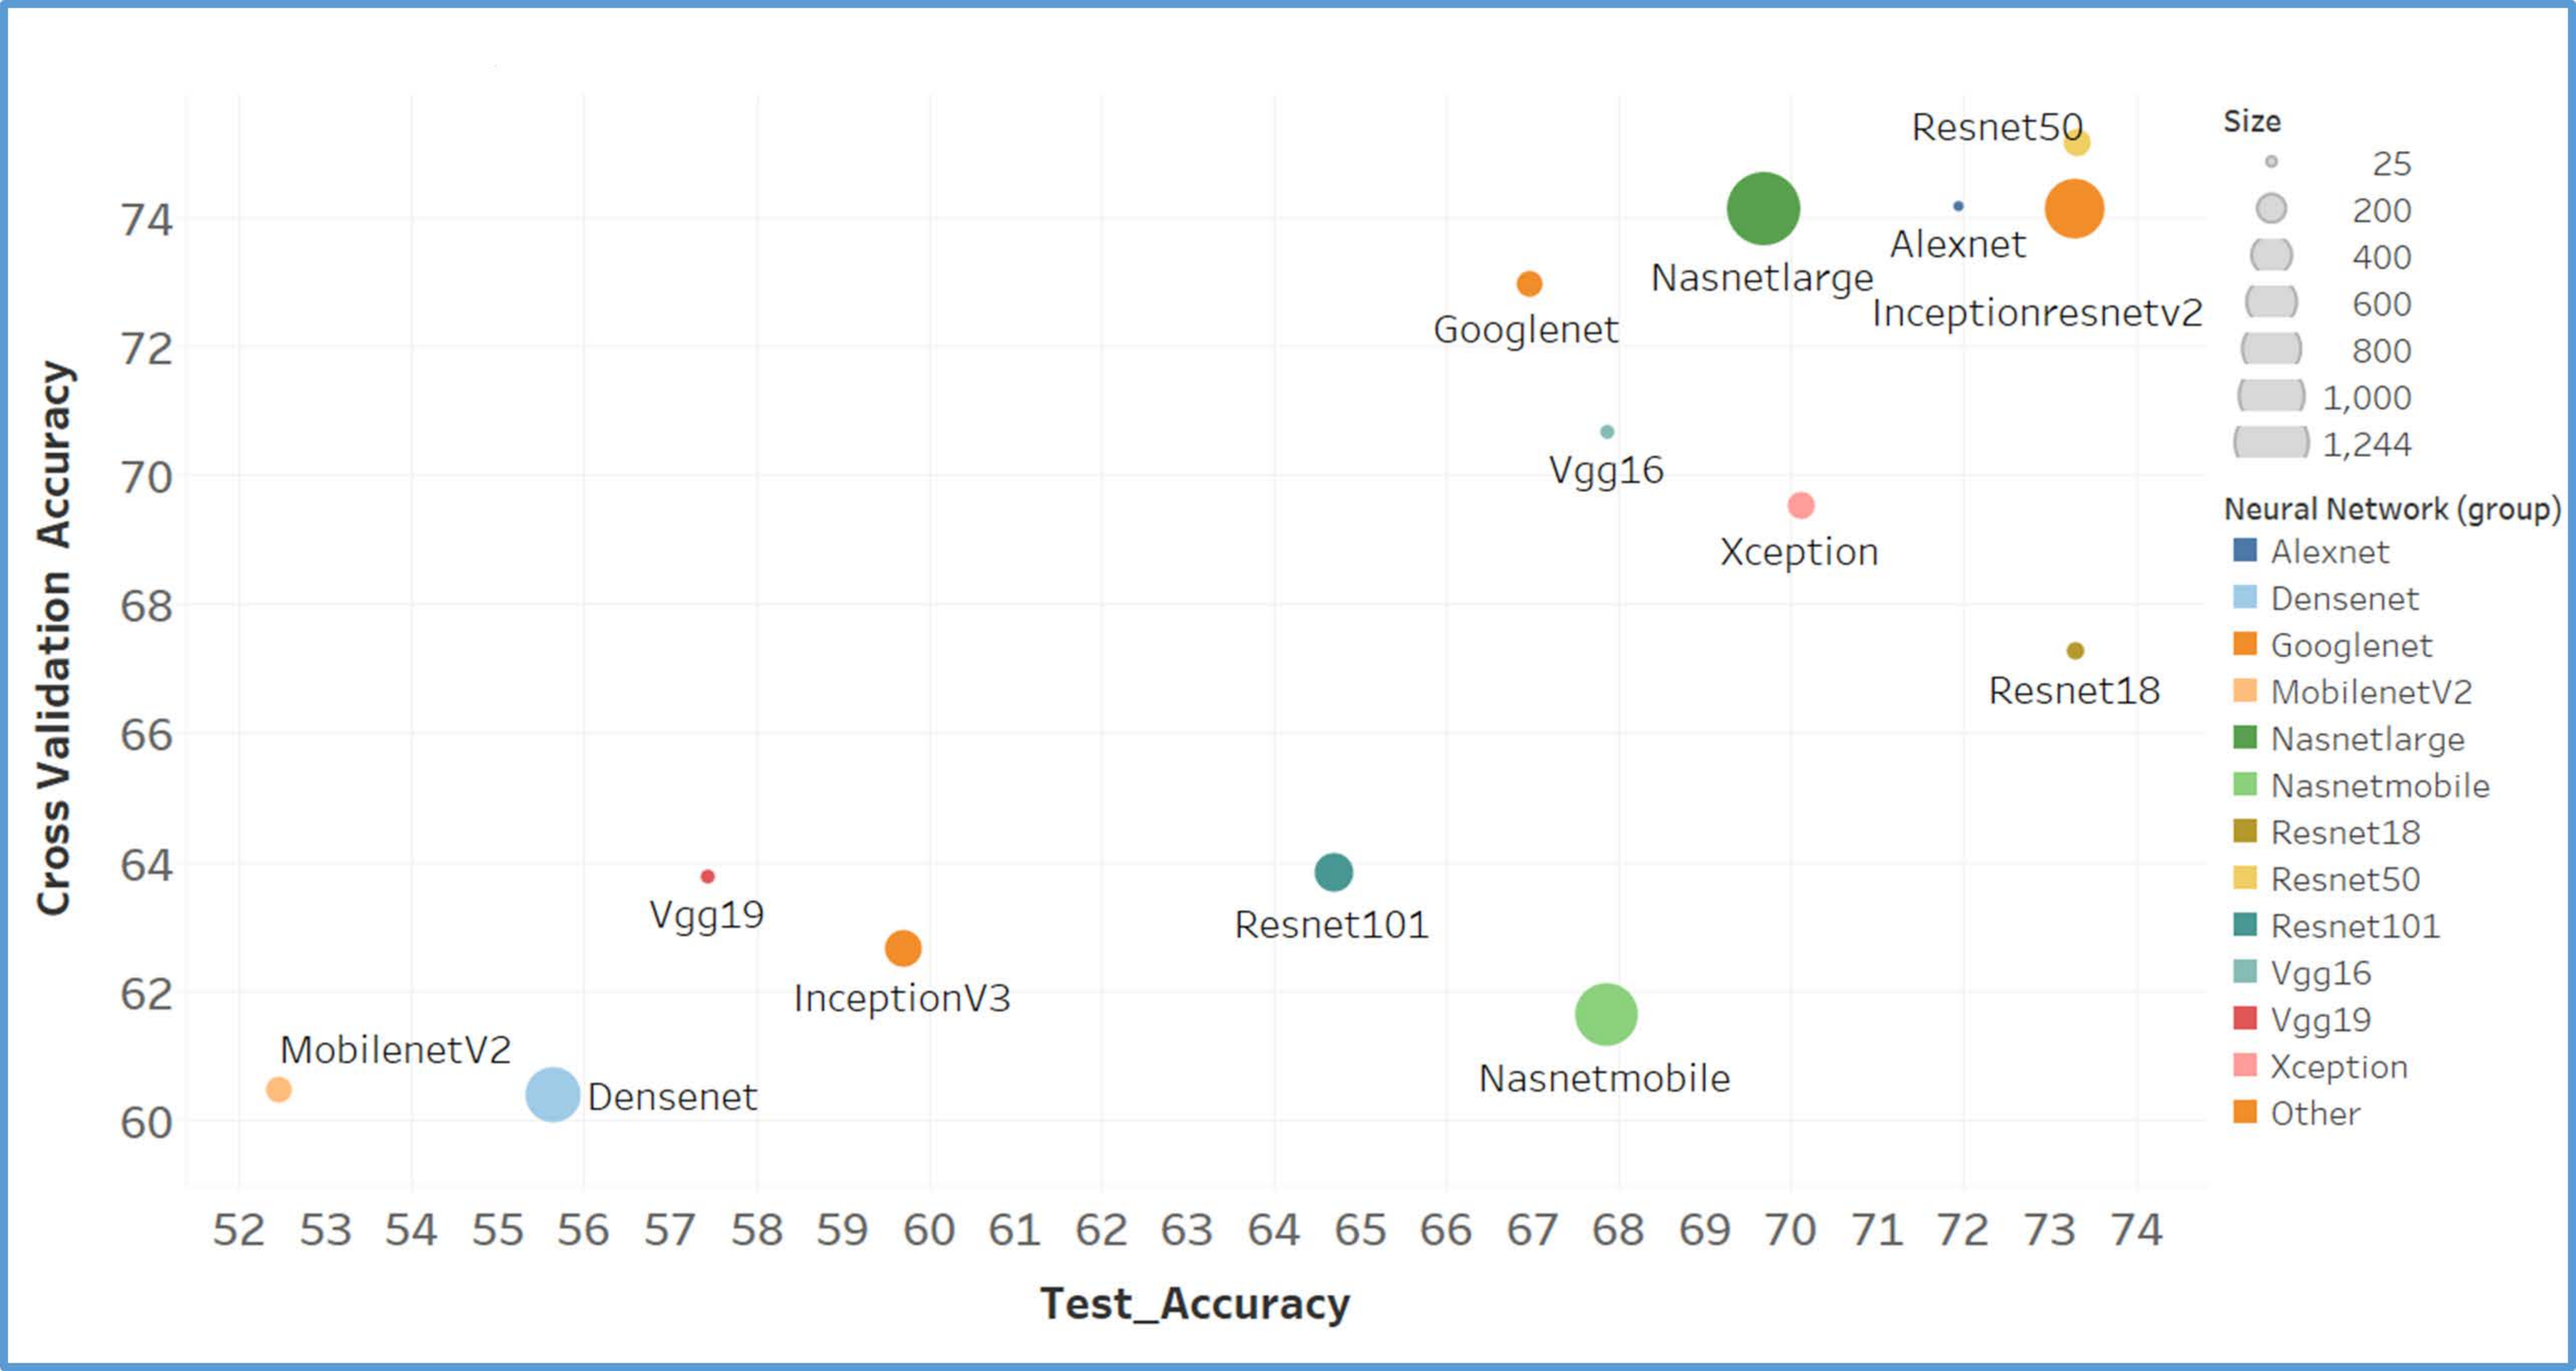

Supplement: s1 [file s1]

A

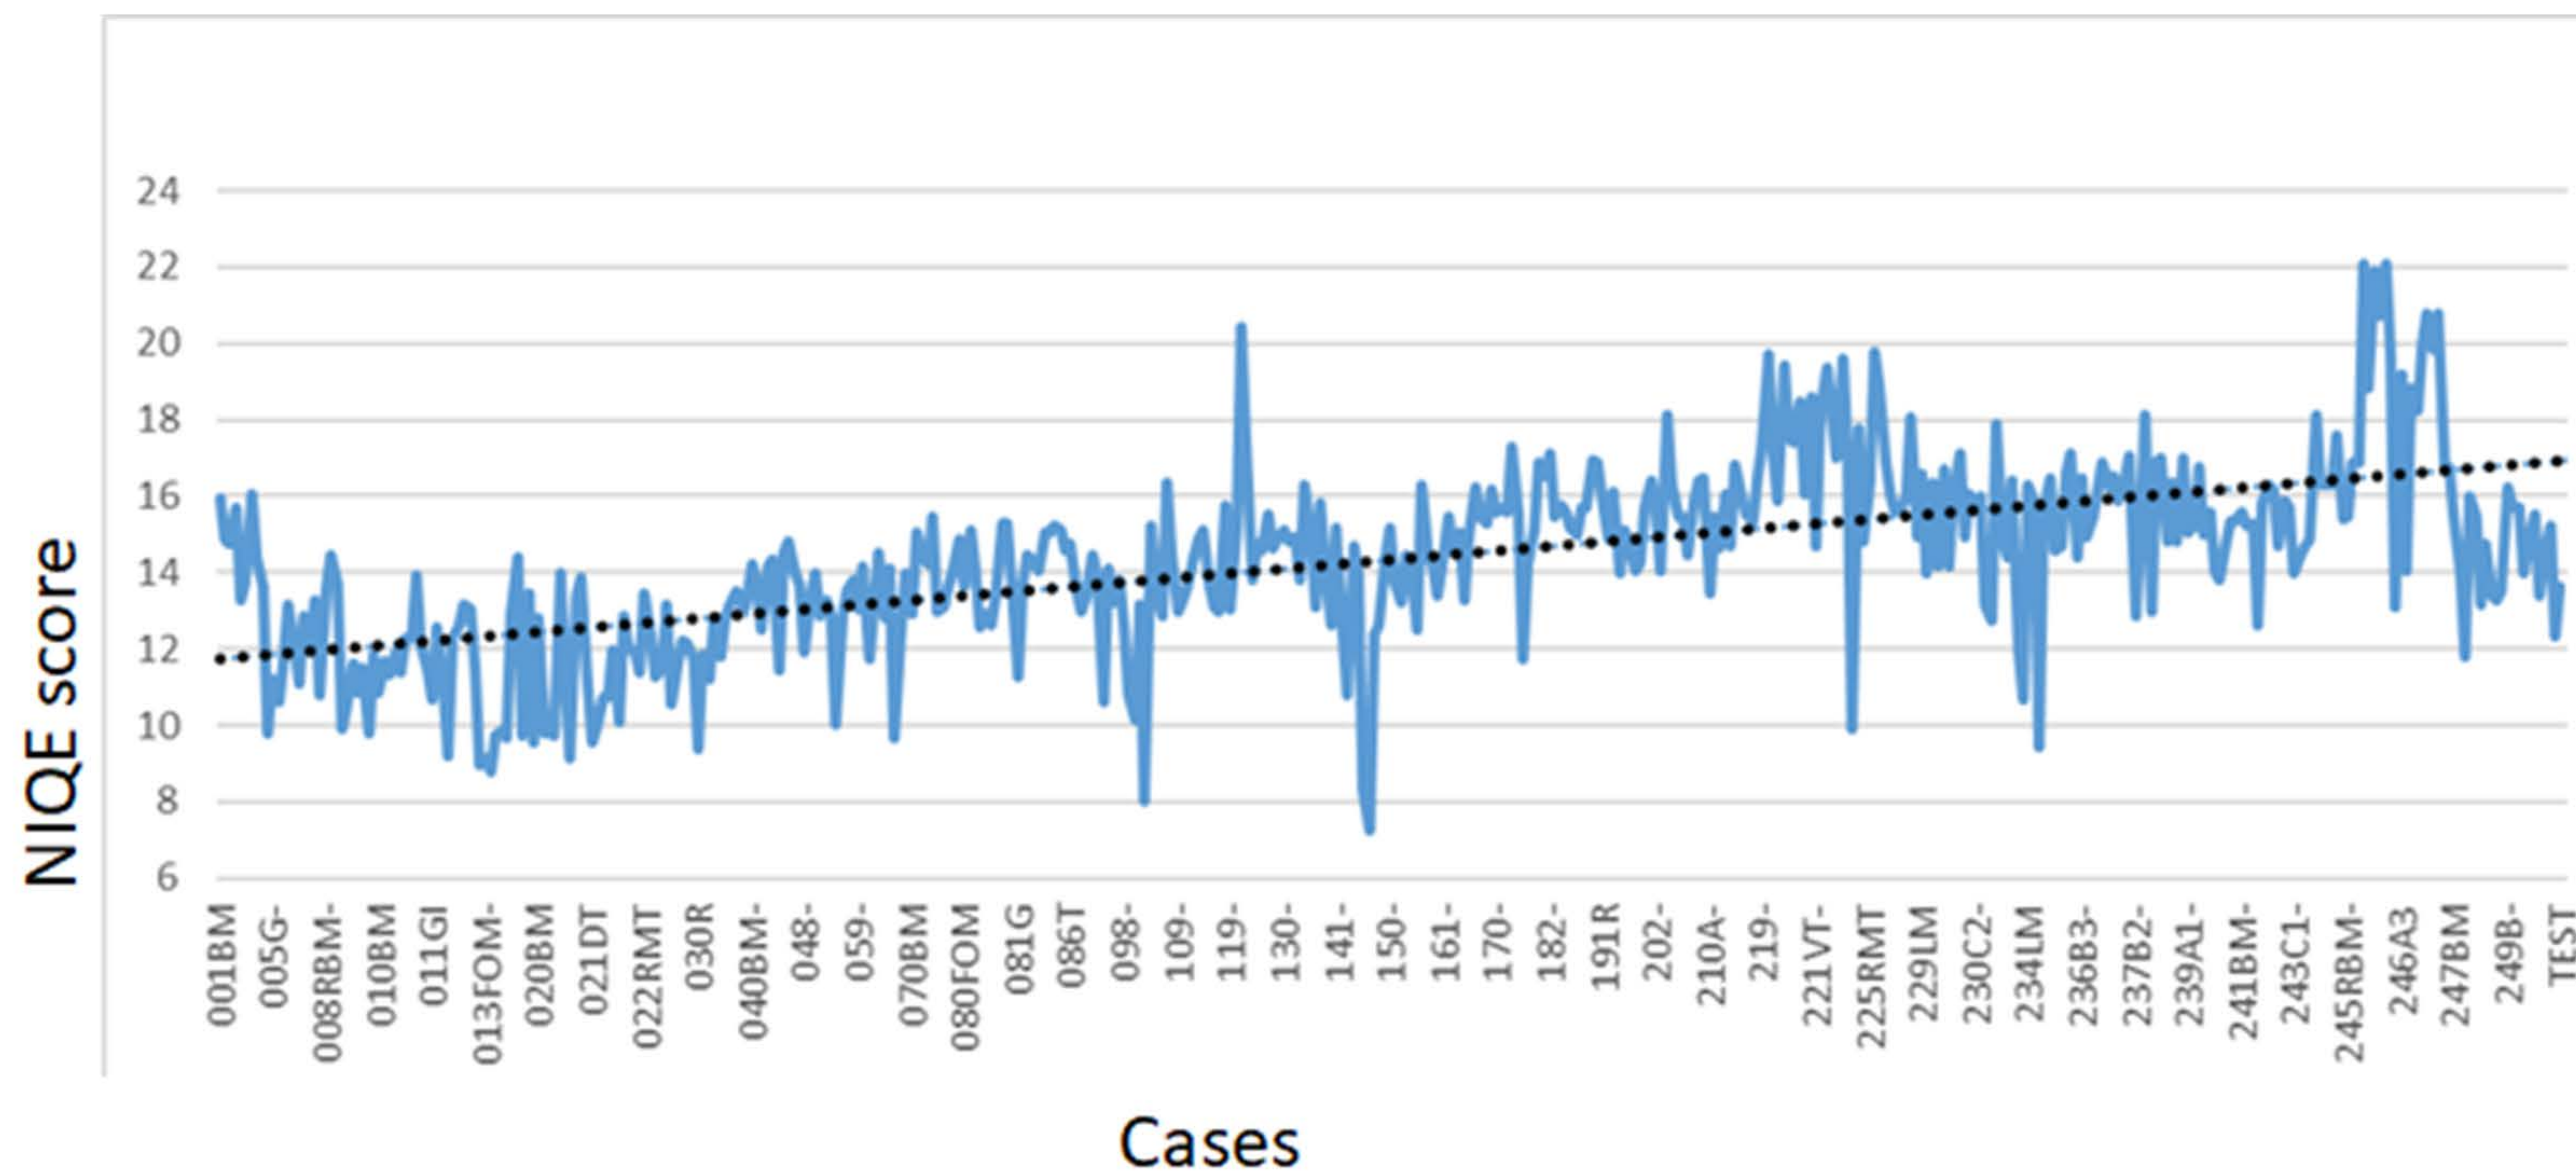

B

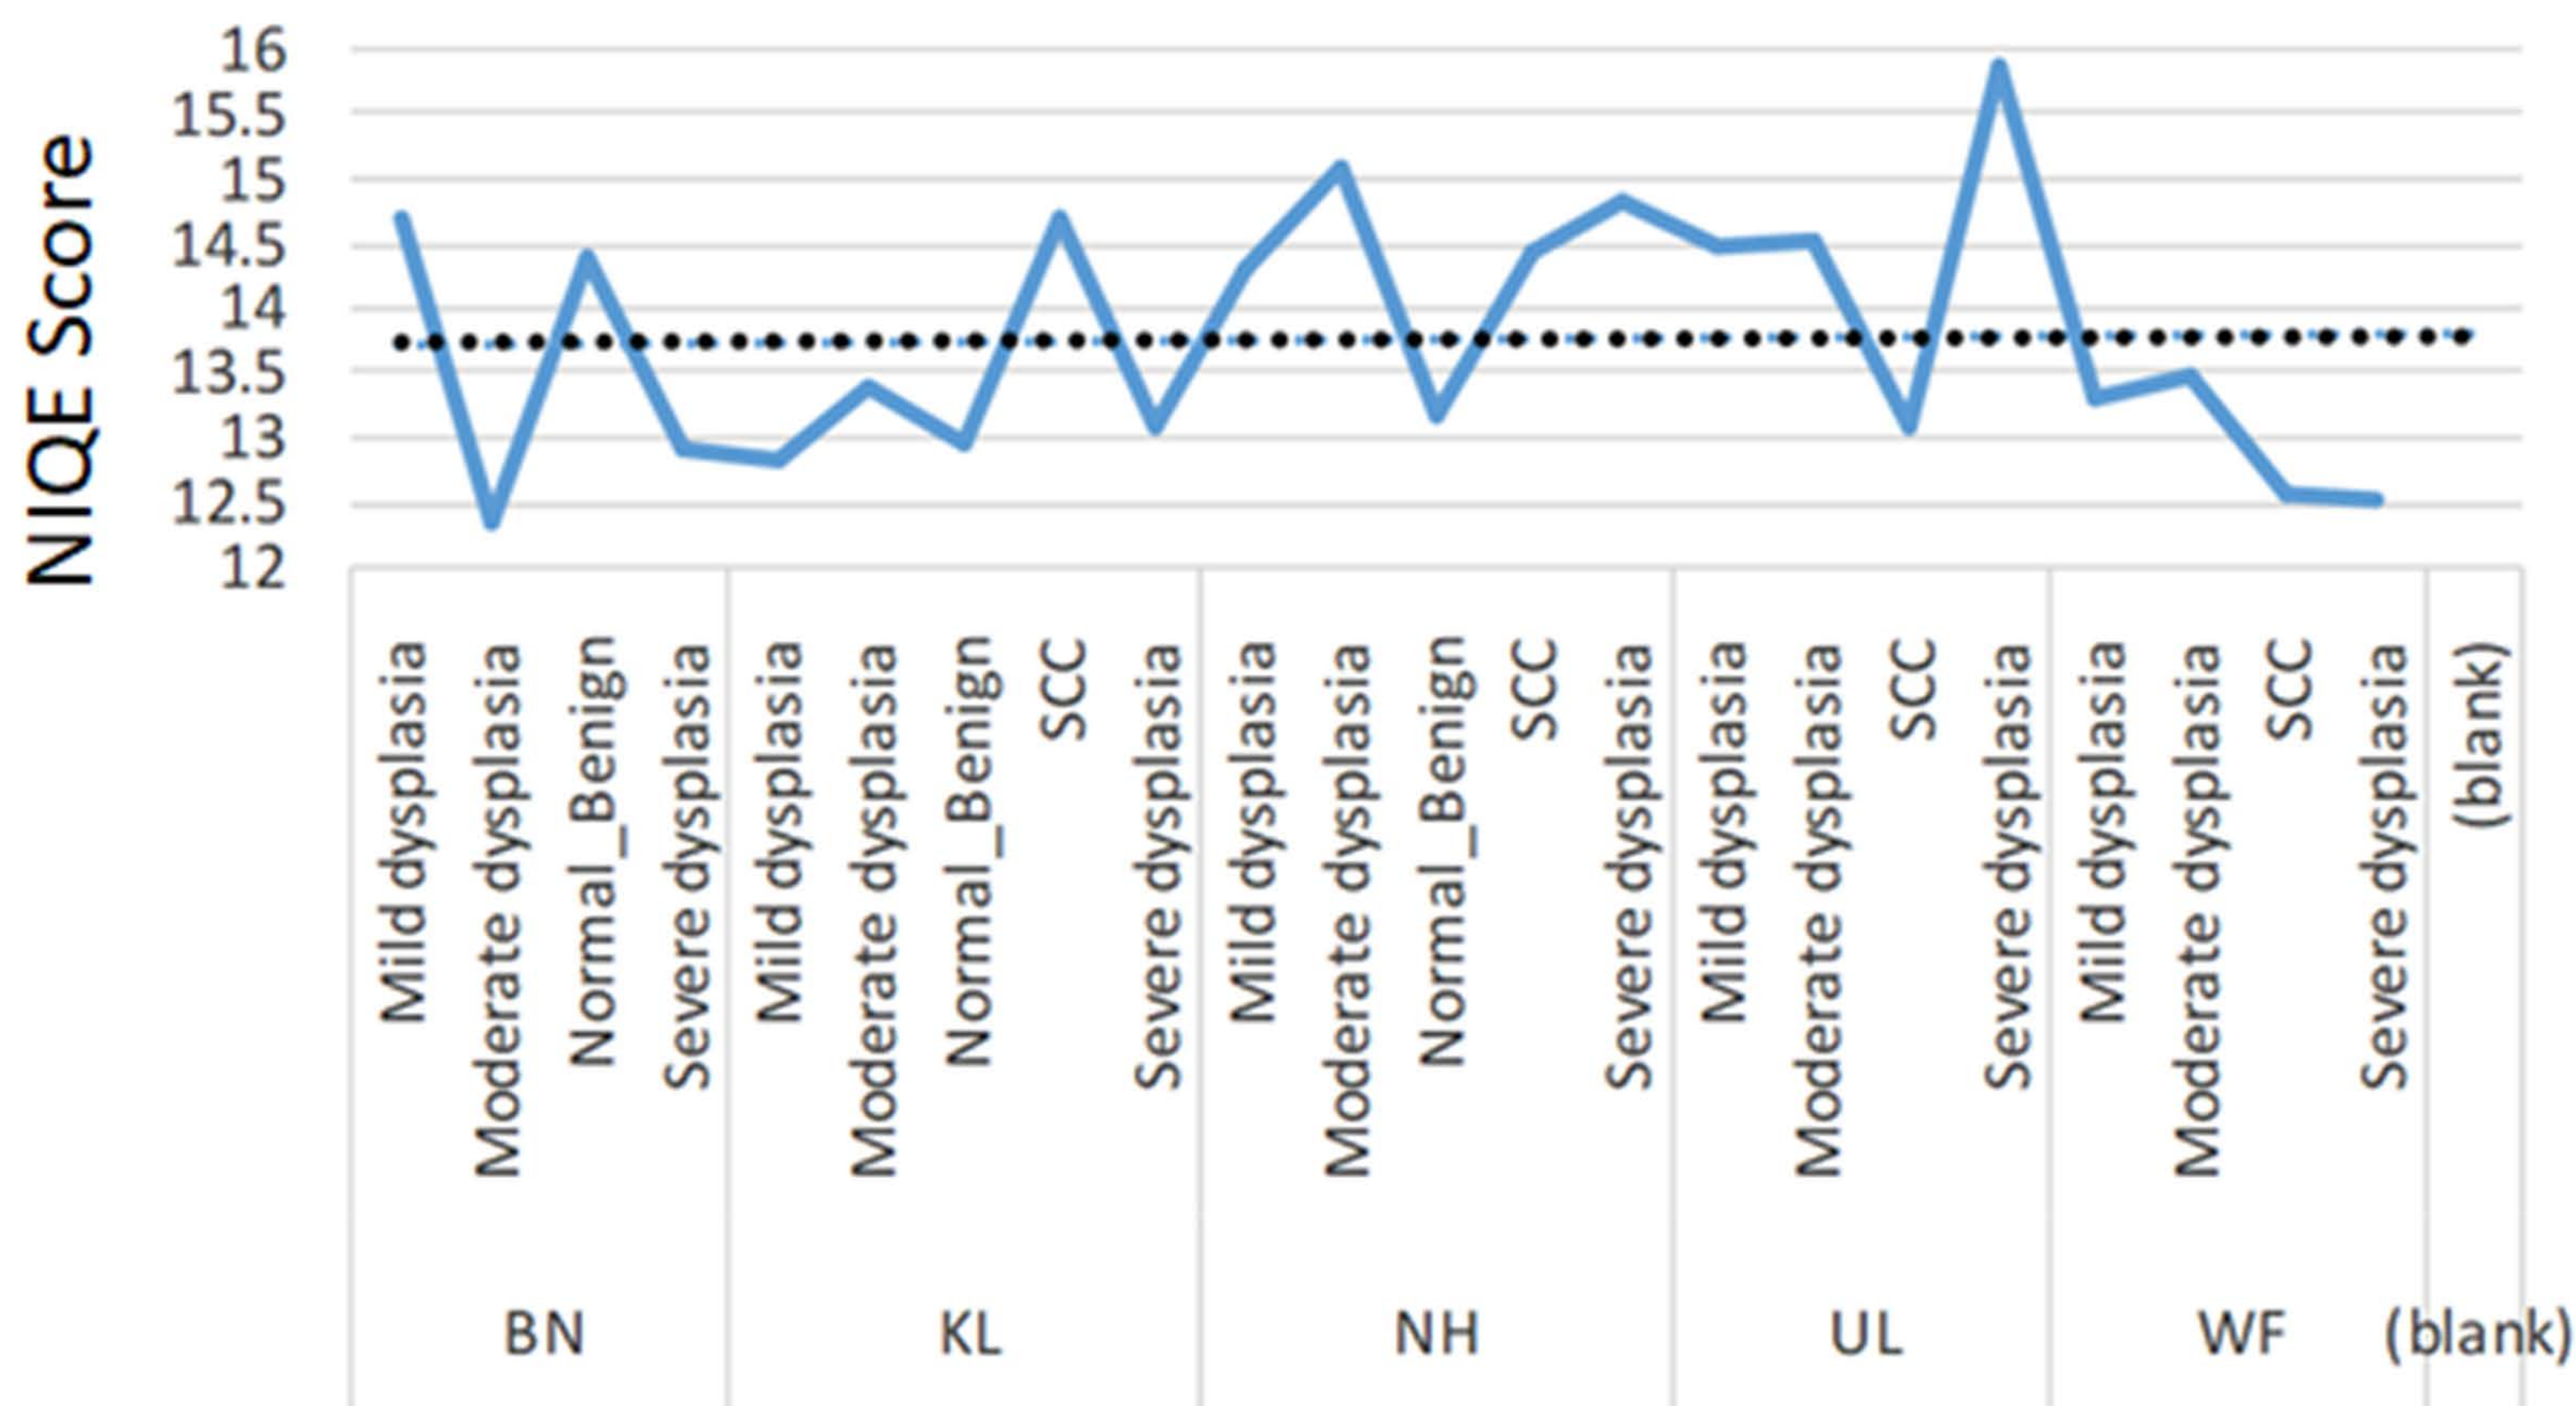

Supplement: s1 [file s1]
